# Supplementary material for: AgBF4-catalyzed insertion of unactivated alkynes into C–F bonds of acyl fluorides
Source: Royal Society of Chemistry journal article supplement (doi:10.1039/d6sc02480g), 2026-05-13

**Supporting Information**  
**for**  
**AgBF<sub>4</sub>-Catalyzed Insertion of Unactivated Alkynes into C–F Bonds of Acyl Fluorides**

Tomoya Emmei,<sup>a</sup> and Mamoru Tobisu<sup>\*,a,b</sup>

<sup>a</sup>*Department of Applied Chemistry, Graduate School of Engineering, The University of Osaka, Suita, Osaka 561-0871, Japan*

<sup>b</sup>*Innovative Catalysis Science Division, Institute for Open and Transdisciplinary Research Initiatives (ICS-OTRI), The University of Osaka, Suita, Osaka 565-0871, Japan.*

*tobisu@chem.eng.osaka-u.ac.jp*

**CONTENTS**

|             |                                        |            |
|-------------|----------------------------------------|------------|
| <b>I</b>    | <b>General Information</b>             | <b>S2</b>  |
| <b>II</b>   | <b>Materials</b>                       | <b>S2</b>  |
| <b>III</b>  | <b>Synthesis of Acyl Fluorides</b>     | <b>S2</b>  |
| <b>IV</b>   | <b>Optimization Studies</b>            | <b>S6</b>  |
| <b>V</b>    | <b>Spectroscopic Data of Products</b>  | <b>S9</b>  |
| <b>VI</b>   | <b>Mechanistic Studies</b>             | <b>S24</b> |
| <b>VII</b>  | <b>List of Unsuccessful Substrates</b> | <b>S31</b> |
| <b>VIII</b> | <b>DFT Calculations</b>                | <b>S33</b> |
| <b>IX</b>   | <b>References</b>                      | <b>S38</b> |
| <b>X</b>    | <b>Copies of NMR Spectra</b>           | <b>S39</b> |

## I. General Information

$^1\text{H}$ ,  $^{13}\text{C}$ ,  $^{19}\text{F}$  NMR spectra were recorded on a JEOL ECS-400 spectrometer in  $\text{CDCl}_3$ . The chemical shifts in  $^1\text{H}$  NMR spectra were recorded relative to tetramethyl silane ( $\delta$  0.00) or  $\text{CHCl}_3$  ( $\delta$  7.26). The chemical shifts in  $^{13}\text{C}$  NMR spectra were recorded relative to  $\text{CDCl}_3$  ( $\delta$  77.00). The chemical shifts in  $^{19}\text{F}$  NMR spectra were recorded relative to benzotrifluoride ( $\text{PhCF}_3$ ,  $\delta$  -65.64). The data is reported as follows: chemical shift ( $\delta$ ) in ppm, coupling constant (Hz), and integration. Infrared spectra (IR) were obtained using a JASCO FT/IR-4200 spectrometer. Absorption is reported in reciprocal centimeters ( $\text{cm}^{-1}$ ) with the following relative intensities: s (strong), m (medium), or w (weak). High resolution mass spectra (HRMS) were obtained using a JEOL JMS-T100LP spectrometer. Melting points were determined using a Yamato melting point apparatus. Column chromatography was performed with  $\text{SiO}_2$  (Silicycle SilicaFlash F60 (230-400 mesh)).

## II. Materials

$\text{AgBF}_4$  was purchased from Aldrich and used as received in the glovebox. 1,1,2,2-Tetrachloroethane (TCE) was purchased from TCI and used as received in the glovebox. Unless otherwise stated, all commercially available reagents and solvents were supplied from TCI, Wako Chemical, Aldrich and BLD and used as received. Acyl fluorides **1a** [CAS:701-53-1],<sup>1</sup> **1c** [CAS: 350-42-5],<sup>1</sup> **1d** [CAS: 72398-40-4],<sup>1</sup> **1e** [CAS: 2254447-02-2],<sup>2</sup> **1f** [CAS: 370-12-7],<sup>3</sup> **1g** [CAS: 37827-83-1],<sup>1</sup> **1h** [CAS: 3020788-99-9],<sup>4</sup> **1i** [CAS: 364-20-5],<sup>1</sup> **1j** [CAS: 138421-49-5],<sup>5</sup> **1o** [CAS: 334-47-4],<sup>6</sup> **1p** [CAS: 1977-87-3],<sup>1</sup> **1q** [CAS: 10405-61-5],<sup>1</sup> **1r** [CAS: 38986-89-9],<sup>1</sup> **1t** [2921955-03-3],<sup>7</sup> **1u** [CAS: 359699-03-9],<sup>1</sup> were prepared according to the literature procedures.

## III. Synthesis of Acyl Fluorides

**A general procedure for the synthesis of starting acyl fluorides.**

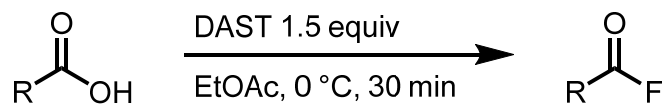

A carboxylic acid (5.0 mmol) and dehydrated EtOAc (15 mL) were added to a round-bottom flask under  $\text{N}_2$  atmosphere. After the mixture was cooled to  $0\text{ }^\circ\text{C}$ , DAST (1.0 mL, 7.5 mmol, 1.5 equiv) was added dropwise, and the resulting mixture was stirred at  $0\text{ }^\circ\text{C}$  for 30 min. An aqueous saturated solution of  $\text{NaHCO}_3$  (30 mL) was then added, and the organic layer was separated and dried using  $\text{Na}_2\text{SO}_4$ .

After filtration, volatiles were removed in vacuo and the residue was purified by flash column chromatography to give the desired acyl fluoride.

### Spectroscopic data of 1.

#### 3-Chloro-4-methoxybenzoyl fluoride (1k).

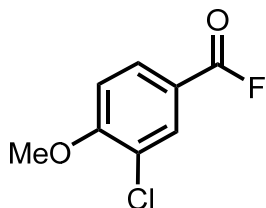

The synthesis was performed on a 3.0 mmol scale according to General Procedures using the commercially available 3-chloro-4-methoxybenzoic acid.

Brown solid (322.8 mg, 60%).  $R_f$  0.43 (SiO<sub>2</sub>, Hexane/EtOAc = 9/1). M.p. 59–61 °C.

<sup>1</sup>H NMR (CDCl<sub>3</sub>, 400 MHz)  $\delta$ : 8.02-7.93 (m, 2H), 7.02 (d,  $J$  = 8.0 Hz, 1H), 4.00 (s, 3H).

<sup>13</sup>C NMR {<sup>1</sup>H, <sup>19</sup>F} (CDCl<sub>3</sub>, 101 MHz)  $\delta$ : 160.5, 156.2, 133.2, 132.1, 123.4, 117.5, 111.7, 56.6.

<sup>19</sup>F NMR (CDCl<sub>3</sub>, 376 MHz)  $\delta$ : 13.8.

IR (ATR): 2961 w, 1793 s, 1595 s, 1500 s, 1441 m, 1410 m, 1319 m, 1273 s, 1219 s, 1155 w, 1064 s, 1011 s, 900 m, 849 m, 822 m, 740 s, 693 m, 615 s.

HRMS (DART+, [M+H]<sup>+</sup>) Calcd for C<sub>8</sub>H<sub>7</sub><sup>35</sup>ClFO<sub>2</sub>: 189.0113. Found: 189.0117.

#### Dibenzo[b,d]furan-4-carbonyl fluoride (1l).

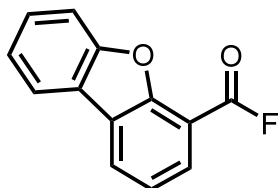

The synthesis was performed on a 3.0 mmol scale according to General Procedures using the commercially available dibenzo[b,d]furan-4-carboxylic acid.

White solid (322 mg, 50%).  $R_f$  0.50 (SiO<sub>2</sub>, Hexane/EtOAc = 9/1). M.p. 106–108 °C.

<sup>1</sup>H NMR (CDCl<sub>3</sub>, 400 MHz)  $\delta$ : 8.25 (dd,  $J$  = 7.7, 1.3 Hz, 1H), 8.08 (dd,  $J$  = 7.8, 0.5 Hz, 1H), 7.98-7.96 (m, 1H), 7.70 (d,  $J$  = 8.2 Hz, 1H), 7.56-7.52 (m, 1H), 7.48-7.40 (m, 2H).

<sup>13</sup>C NMR {<sup>1</sup>H, <sup>19</sup>F} (CDCl<sub>3</sub>, 101 MHz)  $\delta$ : 156.5, 155.8, 154.8, 130.4, 128.4, 127.8, 126.5, 123.7, 122.8, 122.5, 120.7, 112.3, 109.8.

<sup>19</sup>F NMR (CDCl<sub>3</sub>, 376 MHz)  $\delta$ : 26.3.

IR (ATR): 1800 s, 1597 w, 1450 m, 1421 s, 1278 m, 1250 m, 1188 s, 1130 m, 1096 m, 1015 m, 867 m, 819 w, 772 s, 741 s, 715 s, 628 w.

HRMS (DART+, [M+H]<sup>+</sup>) Calcd for C<sub>13</sub>H<sub>8</sub>FO<sub>2</sub>: 215.0503. Found: 215.0512.

### 9-Methyl-9H-carbazole-3-carbonyl fluoride (1m).

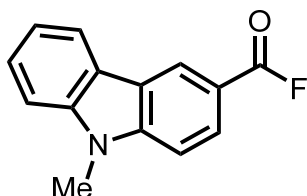

The synthesis was performed on a 1.0 mmol scale according to General Procedures using the corresponding carboxylic acid.<sup>8</sup>

White solid (78 mg, 31%). R<sub>f</sub> 0.25 (SiO<sub>2</sub>, Hexane/EtOAc = 9/1). M.p. 125–126 °C.

<sup>1</sup>H NMR (CDCl<sub>3</sub>, 400 MHz) δ: 8.75 (s, 1H), 8.12 (d, *J* = 8.2 Hz, 2H), 7.59–7.54 (m, 1H), 7.46–7.33 (m, 3H), 3.87 (s, 3H).

<sup>13</sup>C NMR {<sup>1</sup>H, <sup>19</sup>F} (CDCl<sub>3</sub>, 101 MHz) δ: 158.5, 144.6, 141.7, 128.8, 127.0, 125.0, 123.0, 122.5, 120.7, 120.6, 114.6, 109.1, 108.6, 29.3.

<sup>19</sup>F NMR (CDCl<sub>3</sub>, 376 MHz) δ: 12.5.

IR (ATR): 2945 w, 1787 s, 1595 s, 1472 w, 1442 w, 1365 m, 1327 m, 1252 s, 1202 m, 1144 w, 1000 m, 902 w, 826 m, 769 s, 749 m, 715 s, 617 w.

HRMS (DART+, [M+H]<sup>+</sup>) Calcd for C<sub>14</sub>H<sub>11</sub>FNO: 228.0819. Found: 228.0818.

### Synthesis of 9-Acetyl-9H-carbazole-3-carbonyl fluoride (1n).

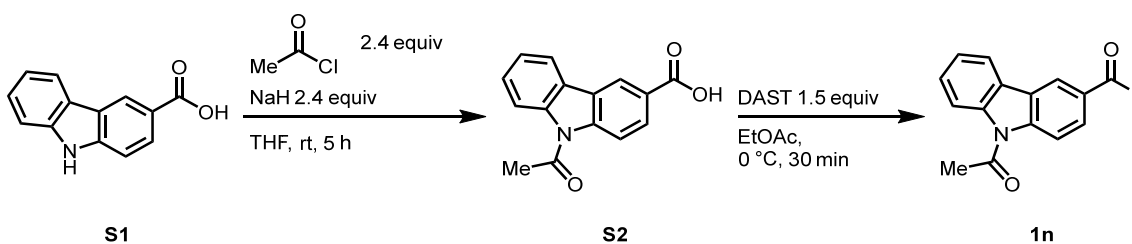

**Synthesis of S2.** In a round-bottom flask, **S1**<sup>9</sup> (0.75 g, 3.5 mmol) was added at 0 °C to a suspension of NaH (0.33 g, 8.4 mmol, 60% dispersion in mineral oil) in THF (10 mL). After the mixture was stirred for 30 min at 0 °C, acetyl chloride (0.60 mL, 8.4 mmol) in THF (10 mL) was added dropwise and the resulting mixture was stirred at rt for 5 h. After HCl (1.0 M, 10 mL) was added, the reaction mixture was extracted with EtOAc (10 mL × 2). The combined organic extracts were washed with water (10 mL) and brine (10 mL), dried over anhydrous Na<sub>2</sub>SO<sub>4</sub>. After filtration, the solvent was removed in vacuo to give crude **S2**, which was used for next step without further purification.

**Synthesis of 1n.** Crude carboxylic acid **S2** (0.63g, ca. 2.5 mmol) and dehydrated EtOAc (10 mL) were added to a round-bottom flask under N<sub>2</sub> atmosphere. After the mixture was cooled to 0 °C, DAST (0.50

mL, 3.8 mmol, 1.5 equiv) was added dropwise, and the resulting mixture was stirred at 0 °C for 30 min. An aqueous saturated solution of NaHCO<sub>3</sub> (15 mL) was then added, and the organic layer was separated and dried using Na<sub>2</sub>SO<sub>4</sub>. After filtration, volatiles were removed in vacuo and the residue was purified by flash column chromatography to give desired acyl fluoride **1n** (383 mg, 43%).

**9-Acetyl-9*H*-carbazole-3-carbonyl fluoride (1n).**

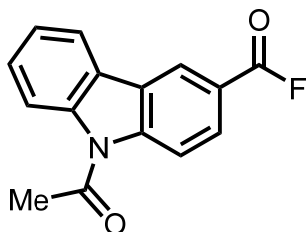

White solid (383 mg, 43% for two steps). R<sub>f</sub> 0.43 (SiO<sub>2</sub>, Hexane/EtOAc = 9/1). M.p. 130–133 °C.

<sup>1</sup>H NMR (CDCl<sub>3</sub>, 400 MHz) δ: 8.69 (d, *J* = 1.4 Hz, 1H), 8.46 (d, *J* = 8.9 Hz, 1H), 8.18–8.08 (m, 3H), 7.60–7.56 (m, 1H), 7.50–7.46 (m, 1H), 2.94 (s, 3H).

<sup>13</sup>C NMR {<sup>1</sup>H, <sup>19</sup>F} (CDCl<sub>3</sub>, 101 MHz) δ: 170.1, 157.5, 142.8, 139.0, 130.4, 128.5, 126.7, 125.3, 124.4, 123.6, 120.5, 119.9, 116.8, 115.9, 27.8.

<sup>19</sup>F NMR (CDCl<sub>3</sub>, 376 MHz) δ: 14.8.

IR (ATR): 1797 s, 1697 m, 1600 w, 1425 w, 1367 m, 1301 m, 1246 m, 1221 s, 1136 w, 1014 m, 912 w, 836 w, 773 s, 753 s, 718 m.

HRMS (DART+, [M+H]<sup>+</sup>) Calcd for C<sub>15</sub>H<sub>11</sub>FNO<sub>2</sub>: 256.0768. Found: 256.0769.

**(3*R*,5*S*,7*R*,8*R*,9*S*,10*S*,12*S*,13*R*,14*S*,17*R*)-17-((*R*)-5-Fluoro-5-oxopentan-2-yl)-10,13-dimethylhexadecahydro-1*H*-cyclopenta[*a*]phenanthrene-3,7,12-triyltriacetate (1s).**

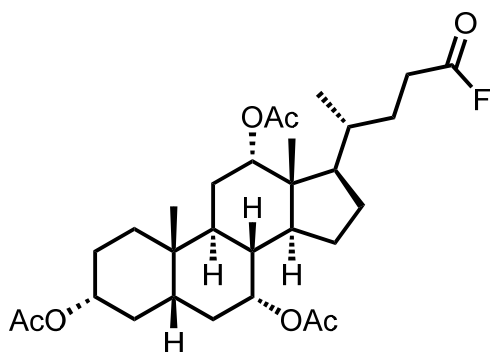

The synthesis was performed on a 4.3 mmol scale according to General Procedures using the corresponding carboxylic acid.<sup>10</sup>

White solid (1.3g, 56%). R<sub>f</sub> 0.72 (SiO<sub>2</sub>, Hexane/EtOAc = 9/1). M.p. 95–98 °C.

<sup>1</sup>H NMR (CDCl<sub>3</sub>, 400 MHz) δ: 5.07 (s, 1H), 4.89 (s, 1H), 4.55 (t, *J* = 10.9 Hz, 1H), 2.57–2.23 (m, 2H), 2.12 (d, *J* = 1.4 Hz, 3H), 2.07 (d, *J* = 1.1 Hz, 3H), 2.03 (t, *J* = 1.0 Hz, 3H), 1.98–1.19 (m, 20H), 1.14–

1.02 (m, 2H), 0.90 (s, 3H), 0.81 (t,  $J = 5.6$  Hz, 3H), 0.71 (d,  $J = 1.6$  Hz, 3H).

$^{13}\text{C}$  NMR ( $^1\text{H}$ ,  $^{19}\text{F}$ ) ( $\text{CDCl}_3$ , 101 MHz)  $\delta$ : 170.5, 170.4, 170.3, 169.8, 75.3, 74.1, 70.7, 47.3, 45.1, 43.4, 40.9, 37.8, 34.7, 34.6, 34.5, 34.4, 34.3, 31.2, 29.8, 28.9, 27.2, 26.9, 25.6, 22.8, 22.5, 21.6, 21.5, 21.4, 17.4, 12.2.

$^{19}\text{F}$  NMR ( $\text{CDCl}_3$ , 376 MHz)  $\delta$ : 43.0

IR (ATR): 2941 w, 2871 w, 1841 w, 1730 s, 1376 m, 1232 s, 1023 m, 965 w, 938 w, 889 w, 771 m, 666 w, 636 w, 608 w, 584 w.

HRMS (ESI+,  $[\text{M}+\text{Na}]^+$ ) Calcd for  $\text{C}_{30}\text{H}_{45}\text{FO}_7\text{Na}$ : 559.3042. Found: 559.3051.

## IV. Optimization Studies

### IV-I. Optimization for the reaction conditions

In a glove box filled with nitrogen,  $\text{AgBF}_4$  (0.020–0.030 mmol, 10–15 mol%) was added to a screw-capped vial and dissolved in TCE (0.5–1.0 mL). Acyl fluoride **1a** (0.20 mmol), alkyne **2a** and TCE (0.5–1.0 mL) were then added into the vial. The screw-cap was closed and the vial was taken out from glove box. The reaction mixture was heated at 120–140 °C for 16–24 h. After the mixture was cooled to rt,  $\text{PhCF}_3$  was added to the reaction mixture as an internal standard and the reaction was analyzed using  $^{19}\text{F}$  NMR.

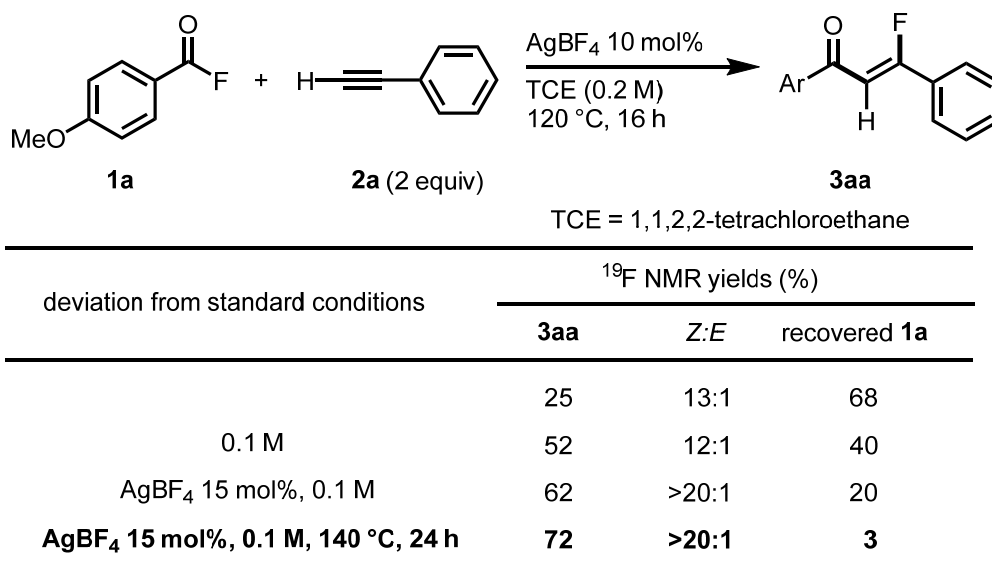

### IV-II. $\text{BF}_4$ salt screening in the reaction of **1a**

In a glove box filled with nitrogen,  $\text{BF}_4$  salt (0.030 mmol, 15 mol%) was added to a screw-capped vial and dissolved in TCE (1.0 mL). Acyl fluoride **1a** (0.20 mmol), alkyne **2a** and TCE (1.0 mL) were then added into the vial. The screw-cap was closed and the vial was taken out from glove box. The reaction mixture was heated at 140 °C for 24 h. After the mixture was cooled to rt,  $\text{PhCF}_3$  was added to the

reaction mixture as an internal standard and the reaction was analyzed using  $^{19}\text{F}$  NMR. Based on the results of  $\text{BF}_4$  salt screening,  $\text{AgBF}_4$  was identified as the most effective  $\text{BF}_4$  salt.

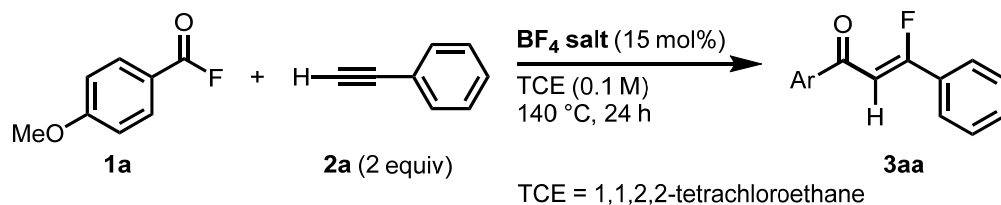

| $\text{BF}_4$ salt                        | $^{19}\text{F}$ NMR yields (%) |                 |                     |
|-------------------------------------------|--------------------------------|-----------------|---------------------|
|                                           | <b>3aa</b>                     | Z:E             | recovered <b>1a</b> |
| <b><math>\text{AgBF}_4</math></b>         | <b>72</b>                      | <b>&gt;20:1</b> | 3                   |
| $\text{ZnBF}_4 \cdot n\text{H}_2\text{O}$ | 6                              | Z only          | 3                   |
| $\text{LiBF}_4$                           | 31                             | Z only          | 50                  |
| $\text{NaBF}_4$                           | 4                              | Z only          | 17                  |
| $\text{Ph}_3\text{C}^+\text{BF}_4^-$      | 61                             | 19:1            | 1                   |
| $\text{HBF}_4$                            | 20                             | Z only          | 18                  |

#### IV-III. $\text{Ag}^+$ salt screening in the reaction of **1a**

In a glove box filled with nitrogen,  $\text{Ag}^+$  salt (0.030 mmol, 15 mol%) was added to a screw-capped vial and dissolved in TCE (1.0 mL). Acyl fluoride **1a** (0.20 mmol), alkyne **2a** and TCE (1.0 mL) were then added into the vial. The screw-cap was closed and the vial was taken out from glove box. The reaction mixture was heated at 140 °C for 24 h. After the mixture was cooled to rt,  $\text{PhCF}_3$  was added into the reaction mixture as an internal standard and the reaction was analyzed using  $^{19}\text{F}$  NMR. Based on the results of  $\text{Ag}^+$  salt screening,  $\text{AgBF}_4$  was identified as the most effective  $\text{Ag}^+$  salt.

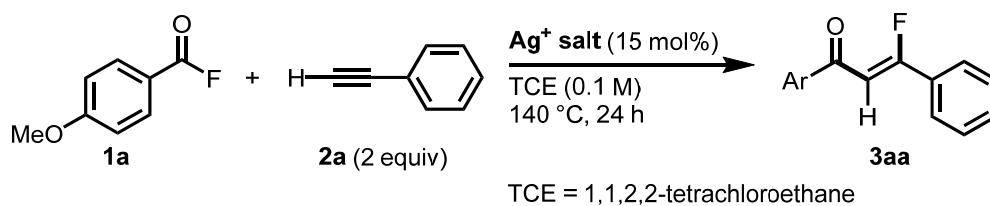

| Ag <sup>+</sup> salt | <sup>19</sup> F NMR yields (%) |        |              |
|----------------------|--------------------------------|--------|--------------|
|                      | 3aa                            | Z:E    | recovered 1a |
| AgBF <sub>4</sub>    | 72                             | >20:1  | 3            |
| AgSbF <sub>6</sub>   | 0                              |        | 18           |
| AgPF <sub>6</sub>    | 9                              | Z only | 85           |
| AgOTf                | 0                              |        | >99          |
| AgF                  | 0                              |        | >99          |

#### IV-IV. Effect of reaction temperature

In a glove box filled with nitrogen, AgBF<sub>4</sub> (0.030 mmol, 15 mol%) was added to a screw-capped vial and dissolved in TCE (1.0 mL). Acyl fluoride **1a** (0.20 mmol), alkyne **2a** and TCE (1.0 mL) were added into the vial. The screw-cap was closed and the vial was taken out from glove box. The reaction mixture was heated for 24 h. After the mixture was cooled to rt, PhCF<sub>3</sub> was added into the reaction mixture as an internal standard and the reaction was analyzed using <sup>19</sup>F NMR. As a result, 140 °C was identified as the most effective temperature.

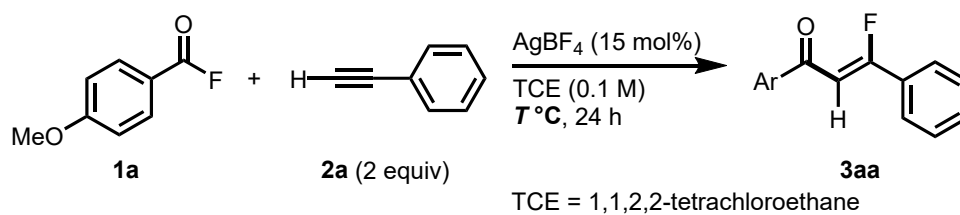

| T (°C)     | <sup>19</sup> F NMR yields (%) |                 |              |
|------------|--------------------------------|-----------------|--------------|
|            | 3aa                            | Z:E             | recovered 1a |
| 40         | 12                             | Z only          | 88           |
| 60         | 19                             | 16:1            | 67           |
| 80         | 32                             | 16:1            | 47           |
| 100        | 43                             | 14:1            | 28           |
| 120        | 59                             | 12:1            | 12           |
| <b>140</b> | <b>72</b>                      | <b>&gt;20:1</b> | <b>3</b>     |

## V. Spectroscopic Data of Products

### (Z)-3-Fluoro-1-(4-methoxyphenyl)-3-phenylprop-2-en-1-one (**3aa**) [CAS: 2169701-03-3].<sup>11</sup>

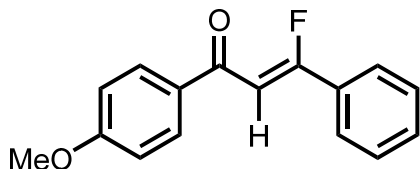

This compound was synthesized by following the typical procedure except that  $\text{AgBF}_4$  (15 mol%) was used. This product **3aa** was obtained as a mixture of *E/Z* isomers ( $Z/E = >20/1$ ), which was determined by  $^{19}\text{F}$  NMR. Corresponding alkynyl ketone **5aa** was also formed as a side product in 12% yield.

Pale yellow solid (35.3 mg, 69%).  $R_f$  0.23 ( $\text{SiO}_2$ , Hexane/EtOAc = 9/1).

$^1\text{H}$  NMR ( $\text{CDCl}_3$ , 400 MHz)  $\delta$ : 7.98 (d,  $J = 8.9$  Hz, 2H), 7.75-7.73 (m, 2H), 7.51-7.44 (m, 3H), 6.98-6.96 (m, 2H), 6.75 (d,  $J = 34.4$  Hz, 1H), 3.89 (s, 3H).

$^{13}\text{C}$  NMR  $\{^1\text{H}\}$  ( $\text{CDCl}_3$ , 101 MHz)  $\delta$ : 187.2, 164.4 (d,  $J_{\text{C-F}} = 276.5$  Hz), 163.4, 131.27, 131.25, 130.9 (d,  $J_{\text{C-F}} = 26.5$  Hz), 130.6, 128.8 (d,  $J_{\text{C-F}} = 1.9$  Hz), 125.6 (d,  $J_{\text{C-F}} = 8.2$  Hz), 113.6, 101.6 (d,  $J_{\text{C-F}} = 7.7$  Hz), 55.3.

$^{19}\text{F}$  NMR ( $\text{CDCl}_3$ , 376 MHz) *Z* isomer  $\delta$ : -101.1 (d,  $J = 34.7$  Hz), *E* isomer  $\delta$ :

HRMS (DART+,  $[\text{M}+\text{H}]^+$ ) Calcd for  $\text{C}_{16}\text{H}_{14}\text{FO}_2$ : 257.0972. Found: 257.0967.

The stereochemistry of **3aa** was determined by HOESY spectroscopy.

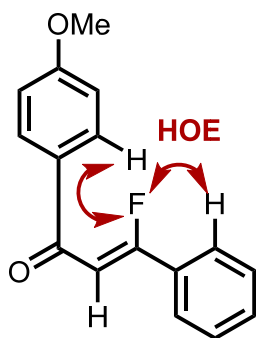

### (Z)-3-Fluoro-1,3-diphenylprop-2-en-1-one (**3ba**) [CAS: 82754-29-8].<sup>12</sup>

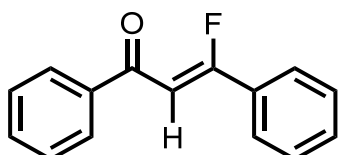

This compound was synthesized by following the typical procedure, except that **1b** was used instead of **1a**. This product **3ba** was obtained as a mixture of *E/Z* isomers ( $Z/E = >20/1$ ), which was determined by  $^{19}\text{F}$  NMR. Corresponding alkynyl ketone **5ba** was also formed as a side product in 23% yield.

Pale yellow oil (21.2 mg, 47%).  $R_f$  0.33 (SiO<sub>2</sub>, Hexane/EtOAc = 9/1).

<sup>1</sup>H NMR (CDCl<sub>3</sub>, 400 MHz)  $\delta$ : 7.99-7.97 (m, 2H), 7.77-7.74 (m, 2H), 7.61-7.56 (m, 1H), 7.54-7.45 (m, 5H), 6.81 (d,  $J$  = 34.1 Hz, 1H).

<sup>13</sup>C NMR {<sup>1</sup>H, <sup>19</sup>F} (CDCl<sub>3</sub>, 101 MHz)  $\delta$ : 188.9, 165.3, 138.6, 132.9, 131.6, 130.8, 128.9, 128.6, 128.3, 125.8, 101.7.

<sup>19</sup>F NMR (CDCl<sub>3</sub>, 376 MHz) *Z isomer*  $\delta$ : -99.5 (d,  $J$  = 34.7 Hz), *E isomer*  $\delta$ : -81.7 (d,  $J$  = 22.4 Hz).

HRMS (DART+, [M+H]<sup>+</sup>) Calcd for C<sub>15</sub>H<sub>12</sub>FO: 227.0867. Found: 227.0863.

**(Z)-3-Fluoro-3-phenyl-1-(p-tolyl)prop-2-en-1-one (3ca) [CAS: 1420041-40-2].<sup>12</sup>**

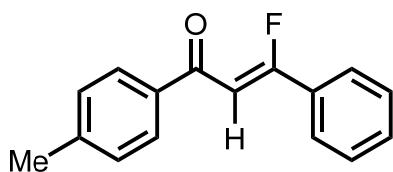

This compound was synthesized by following the typical procedure, except that **1c** was used instead of **1a**. This product **3ca** was obtained as a mixture of *E/Z* isomers ( $Z/E = >20/1$ ), which was determined by <sup>19</sup>F NMR. Corresponding alkynyl ketone **5ca** was also formed as a side product in 15% yield.

Pale yellow oil (26.7 mg, 56%).  $R_f$  0.59 (SiO<sub>2</sub>, Hexane/EtOAc = 9/1).

<sup>1</sup>H NMR (CDCl<sub>3</sub>, 400 MHz)  $\delta$ : 7.88 (d,  $J$  = 8.2 Hz, 2H), 7.76-7.74 (m, 2H), 7.53-7.44 (m, 3H), 7.29 (d,  $J$  = 8.5 Hz, 2H), 6.78 (d,  $J$  = 34.4 Hz, 1H), 2.43 (s, 3H).

<sup>13</sup>C NMR {<sup>1</sup>H, <sup>19</sup>F} (CDCl<sub>3</sub>, 101 MHz)  $\delta$ : 188.5, 164.9, 143.8, 136.0, 131.5, 130.9, 129.2, 128.9, 128.5, 125.8, 101.8, 21.7.

<sup>19</sup>F NMR (CDCl<sub>3</sub>, 376 MHz) *Z isomer*  $\delta$ : -100.3 (d,  $J$  = 34.7 Hz), *E isomer*  $\delta$ : -82.9 (d,  $J$  = 21.7 Hz)

HRMS (DART+, [M+H]<sup>+</sup>) Calcd for C<sub>16</sub>H<sub>14</sub>FO: 241.1023. Found: 241.1022.

**(Z)-1-(4-Bromophenyl)-3-fluoro-3-phenylprop-2-en-1-one (3da) [CAS: 1420041-44-6].<sup>12</sup>**

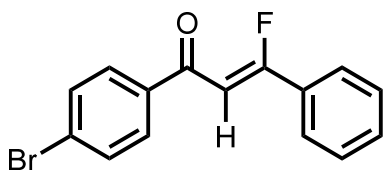

This compound was synthesized by following the typical procedure, except that **1d** was used instead of **1a**. This product **3da** was obtained as a mixture of *E/Z* isomers ( $Z/E = >20/1$ ), which was determined by <sup>19</sup>F NMR, together with an unidentified byproduct (<5%) that could not be separated. Corresponding alkynyl ketone **5da** was also formed as a side product in 20% yield.

Pale yellow solid (24.4 mg, 40%).  $R_f$  0.43 (SiO<sub>2</sub>, Hexane/EtOAc = 9/1).

<sup>1</sup>H NMR (CDCl<sub>3</sub>, 400 MHz)  $\delta$ : 7.83 (m, 2H), 7.76-7.73 (m, 2H), 7.63 (m, 2H), 7.55-7.45 (m, 3H), 6.73 (d,  $J$  = 33.9 Hz, 1H).

$^{13}\text{C}$  NMR  $\{^1\text{H}\}$  ( $\text{CDCl}_3$ , 101 MHz)  $\delta$ : 187.8, 165.6 (d,  $J_{\text{C-F}} = 275.5$  Hz), 137.3, 131.8, 131.8, 130.6 (d,  $J_{\text{C-F}} = 26.0$  Hz), 129.9, 129.0 (d,  $J_{\text{C-F}} = 1.4$  Hz), 128.0, 125.9 (d,  $J_{\text{C-F}} = 8.2$  Hz), 101.3 (d,  $J_{\text{C-F}} = 6.7$  Hz).

$^{19}\text{F}$  NMR ( $\text{CDCl}_3$ , 376 MHz)  $\delta$ : -98.3 (d,  $J = 34.0$  Hz).

HRMS (DART+,  $[\text{M}+\text{H}]^+$ ) Calcd for  $\text{C}_{15}\text{H}_{11}^{79}\text{BrFO}$ : 304.9972. Found: 304.9971.

**(Z)-1-(Benzo[d][1,3]dioxol-5-yl)-3-fluoro-3-phenylprop-2-en-1-one (3ea).**

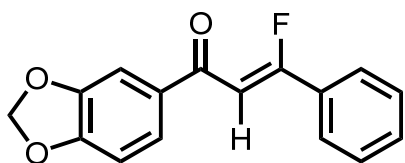

This compound was synthesized by following the typical procedure, except that **1e** was used instead of **1a**. This product **3ea** was obtained as a mixture of *E/Z* isomers ( $Z/E = 20/1$ ), which was determined by  $^{19}\text{F}$  NMR. Corresponding alkynyl ketone **5ea** was also formed as a side product in 14% yield.

Pale yellow solid (23.7 mg, 43%).  $R_f$  0.33 ( $\text{SiO}_2$ , Hexane/EtOAc = 9/1). M.p. 102–104 °C.

$^1\text{H}$  NMR ( $\text{CDCl}_3$ , 400 MHz)  $\delta$ : 7.73 (d,  $J = 8.0$  Hz, 2H), 7.58 (d,  $J = 8.2$  Hz, 1H), 7.52–7.45 (m, 4H), 6.88 (d,  $J = 8.0$  Hz, 1H), 6.72 (d,  $J = 34.1$  Hz, 1H), 6.07 (s, 2H).

$^{13}\text{C}$  NMR  $\{^1\text{H}, ^{19}\text{F}\}$  ( $\text{CDCl}_3$ , 101 MHz)  $\delta$ : 186.9, 151.8, 148.2, 131.5, 128.9, 128.9, 125.8, 125.7, 124.7, 108.2, 107.9, 101.9, 101.7, 101.6.

$^{19}\text{F}$  NMR ( $\text{CDCl}_3$ , 376 MHz) *Z isomer*  $\delta$ : -100.7 (d,  $J = 34.0$  Hz), *E isomer*  $\delta$ : -83.9 (d,  $J = 21.7$  Hz).

IR (ATR): 2984 w, 2360 w, 2344 w, 1734 s, 1446 w, 1373 m, 1237 s, 1097 w, 1044 s, 915 m, 848 w, 772 w, 730 s, 648 w, 634 w, 607 w.

MS,  $m/z$  (relative intensity, %): 270 ( $\text{M}^+$ , 59), 269 (84), 149 (100), 122 (13), 121 (39), 101 (44), 91 (14), 75 (11), 65 (24), 63 (20),

HRMS (DART+,  $[\text{M}+\text{H}]^+$ ) Calcd for  $\text{C}_{16}\text{H}_{12}\text{FO}_3$ : 271.0765. Found: 271.0765.

**(Z)-3-Fluoro-1-(4-phenoxyphenyl)-3-phenylprop-2-en-1-one (3fa).**

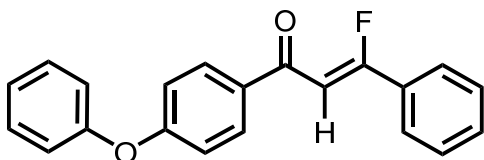

This compound was synthesized by following the typical procedure, except that **1f** was used instead of **1a**. This product **3fa** was obtained as a mixture of *E/Z* isomers ( $Z/E = >20/1$ ), which was determined by  $^{19}\text{F}$  NMR. Corresponding alkynyl ketone **5fa** was also formed as a side product in 18% yield.

Pale yellow oil (40.1 mg, 62%).  $R_f$  0.33 ( $\text{SiO}_2$ , Hexane/EtOAc = 9/1).

$^1\text{H}$  NMR ( $\text{CDCl}_3$ , 400 MHz)  $\delta$ : 7.97 (m, 2H), 7.75–7.73 (m, 2H), 7.53–7.38 (m, 5H), 7.23–7.19 (m,

1H), 7.10-7.01 (m, 4H), 6.76 (d,  $J = 34.1$  Hz, 1H).  
 $^{13}\text{C}$  NMR  $\{^1\text{H}\}$  ( $\text{CDCl}_3$ , 101 MHz)  $\delta$ : 187.4, 164.8 (d,  $J_{\text{C-F}} = 277.4$  Hz), 161.9, 155.4, 133.0, 131.5, 130.8 (d,  $J_{\text{C-F}} = 26.5$  Hz), 130.7, 130.0, 128.9 (d,  $J_{\text{C-F}} = 1.9$  Hz), 125.7 (d,  $J_{\text{C-F}} = 8.2$  Hz), 124.6, 120.1, 117.3, 101.6 (d,  $J_{\text{C-F}} = 7.2$  Hz).  
 $^{19}\text{F}$  NMR ( $\text{CDCl}_3$ , 376 MHz) *Z isomer*  $\delta$ : -100.3 (d,  $J = 34.0$  Hz) *E isomer*  $\delta$ : -82.9 (d,  $J = 21.7$  Hz).  
IR (ATR): 3065 w, 1670 m, 1613 m, 1584 m, 1488 s, 1350 w, 1285 m, 1243 s, 1213 s, 1165 s, 996 m, 870 m, 819 m, 746 m, 689 m, 582 m.  
MS,  $m/z$  (relative intensity, %): 319 (11), 318 ( $\text{M}^+$ , 58), 317 (100), 290 (13), 197 (37), 149 (37), 141 (23), 121 (12), 115 (31), 101 (35), 77 (26), 51 (16).  
HRMS (DART+,  $[\text{M}+\text{H}]^+$ ) Calcd for  $\text{C}_{21}\text{H}_{16}\text{FO}_2$ : 319.1129. Found: 319.1129.

**(Z)-3-Fluoro-1-(naphthalen-2-yl)-3-phenylprop-2-en-1-one (3ga) [CAS: 1420041-50-4].<sup>12</sup>**

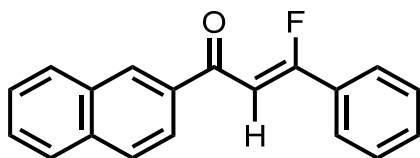

This compound was synthesized by following the typical procedure, except that **1g** was used instead of **1a**. This product **3ga** was obtained as a mixture of *E/Z* isomers ( $Z/E = 20/1$ ), which was determined by  $^{19}\text{F}$  NMR. Corresponding alkynyl ketone **5ga** was also formed as a side product in 22% yield.  
Pale yellow solid (21.3 mg, 43%).  $R_f$  0.32 ( $\text{SiO}_2$ , Hexane/EtOAc = 9/1).  
 $^1\text{H}$  NMR ( $\text{CDCl}_3$ , 400 MHz)  $\delta$ : 8.47 (s, 1H), 8.08-7.89 (m, 4H), 7.80 (d,  $J = 7.8$  Hz, 2H), 7.63-7.48 (m, 5H), 6.94 (d,  $J = 34.1$  Hz, 1H).  
 $^{13}\text{C}$  NMR  $\{^1\text{H}, ^{19}\text{F}\}$  ( $\text{CDCl}_3$ , 101 MHz)  $\delta$ : 188.7, 165.2, 135.9, 135.5, 132.5, 131.6, 130.9, 129.9, 129.5, 128.9, 128.5, 128.4, 127.8, 126.8, 125.9, 124.2, 101.8.  
 $^{19}\text{F}$  NMR ( $\text{CDCl}_3$ , 376 MHz) *Z isomer*  $\delta$ : -99.6 (d,  $J = 34.0$  Hz), *E isomer*  $\delta$ : -82.2 (d,  $J = 21.7$  Hz).  
HRMS (DART+,  $[\text{M}+\text{H}]^+$ ) Calcd for  $\text{C}_{19}\text{H}_{14}\text{FO}$ : 277.1023. Found: 277.1020.

**(Z)-3-Fluoro-1-(6-methoxynaphthalen-2-yl)-3-phenylprop-2-en-1-one (3ha).**

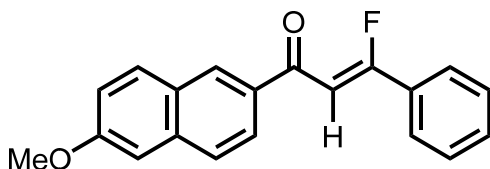

This compound was synthesized by following the typical procedure, except that **1h** was used instead of **1a**. This product **3ha** was obtained as a mixture of *E/Z* isomers ( $Z/E = 20/1$ ), which was determined by  $^{19}\text{F}$  NMR. Corresponding alkynyl ketone **5ha** was also formed as a side product in 20% yield.  
Pale yellow solid (28.2 mg, 46%).  $R_f$  0.20 ( $\text{SiO}_2$ , Hexane/EtOAc = 9/1). M.p. 130–132 °C.

$^1\text{H}$  NMR ( $\text{CDCl}_3$ , 400 MHz)  $\delta$ : 8.41 (d,  $J = 0.7$  Hz, 1H), 8.05 (dd,  $J = 8.7, 1.8$  Hz, 1H), 7.87 (d,  $J = 8.9$  Hz, 1H), 7.82-7.78 (m, 3H), 7.55-7.47 (m, 3H), 7.23-7.17 (m, 2H), 6.93 (d,  $J = 34.4$  Hz, 1H), 3.96 (s, 3H).

$^{13}\text{C}$  NMR  $\{^1\text{H}, ^{19}\text{F}\}$  ( $\text{CDCl}_3$ , 101 MHz)  $\delta$ : 188.4, 164.9, 159.7, 137.2, 133.9, 131.5, 131.1, 131.0, 129.9, 128.9, 127.8, 127.2, 125.8, 124.9, 119.7, 105.7, 101.8, 55.4.

$^{19}\text{F}$  NMR ( $\text{CDCl}_3$ , 376 MHz)  $\delta$ : -100.5 (d,  $J = 34.7$  Hz).

IR (ATR): 2984 w, 1734 s, 1373 m, 1237 s, 1044 s, 915 m, 848 w, 730 s, 648 w, 607 w.

MS,  $m/z$  (relative intensity, %): 307 (24), 306 ( $\text{M}^+$ , 100), 305 (79), 278 (18), 263 (12), 185 (36), 158 (13), 157 (28), 149 (35), 142 (18), 121 (10), 114 (25), 101 (30).

HRMS (DART+,  $[\text{M}+\text{H}]^+$ ) Calcd for  $\text{C}_{20}\text{H}_{16}\text{FO}_2$ : 307.1129. Found: 307.1127.

**(Z)-3-Fluoro-3-phenyl-1-(o-tolyl)prop-2-en-1-one (3ia) [Cas: 2222483-29-4].<sup>1</sup>**

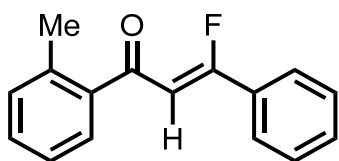

This compound was synthesized by following the typical procedure, except that **1i** was used instead of **1a**. This product **3ca** was obtained as a mixture of *E/Z* isomers ( $Z/E = >20/1$ ), which was determined by  $^{19}\text{F}$  NMR. Corresponding alkynyl ketone **5ia** was also formed as a side product in 13% yield.

Pale yellow oil (30.8 mg, 64%).  $R_f$  0.49 ( $\text{SiO}_2$ , Hexane/EtOAc = 9/1).

$^1\text{H}$  NMR ( $\text{CDCl}_3$ , 400 MHz)  $\delta$ : 7.72-7.70 (m, 2H), 7.57 (d,  $J = 8.2$  Hz, 1H), 7.54-7.45 (m, 3H), 7.39 (td,  $J = 7.3, 1.4$  Hz, 1H), 7.30-7.26 (m, 2H), 6.55 (d,  $J = 34.8$  Hz, 1H), 2.52 (s, 3H).

$^{13}\text{C}$  NMR ( $\text{CDCl}_3$ , 101 MHz)  $\delta$ : 193.2, 165.1 (d,  $J_{\text{C-F}} = 278.0$  Hz), 140.0, 136.9, 131.5 (d,  $J_{\text{C-F}} = 31.6$  Hz), 130.7, 130.5, 128.9, 128.9, 128.0, 125.8 (d,  $J_{\text{C-F}} = 8.6$  Hz), 125.6, 105.3 (d,  $J_{\text{C-F}} = 6.7$  Hz), 20.3.

$^{19}\text{F}$  NMR ( $\text{CDCl}_3$ , 376 MHz) *Z isomer*  $\delta$ : -99.4 (d,  $J = 34.7$  Hz), *E isomer*  $\delta$ : -82.2 (d,  $J = 23.1$  Hz).

HRMS (DART+,  $[\text{M}+\text{H}]^+$ ) Calcd for  $\text{C}_{16}\text{H}_{14}\text{FO}$ : 241.1023. Found: 241.1012.

**(Z)-3-Fluoro-1-(2-methoxyphenyl)-3-phenylprop-2-en-1-one (3ja) [CAS: 1420041-42-4].<sup>12</sup>**

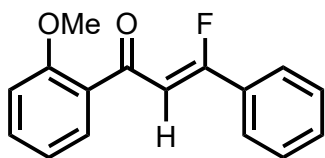

This compound was synthesized by following the typical procedure, except that **1j** was used instead of **1a**. This product **3ja** was obtained as a mixture of *E/Z* isomers ( $Z/E = 17/1$ ), which was determined by  $^{19}\text{F}$  NMR. Corresponding alkynyl ketone **5ja** was also formed as a side product in 12% yield.

Pale yellow oil (20.5 mg, 40%).  $R_f$  0.29 ( $\text{SiO}_2$ , Hexane/EtOAc = 9/1).

$^1\text{H}$  NMR ( $\text{CDCl}_3$ , 400 MHz)  $\delta$ : 7.72-7.63 (m, 3H), 7.51-7.38 (m, 4H), 7.06-6.97 (m, 2H), 6.85 (d,  $J = 34.8$  Hz, 1H), 3.90 (s, 3H).

$^{13}\text{C}$  NMR ( $\text{CDCl}_3$ , 101 MHz)  $\delta$ : 189.8, 164.3 (d,  $J_{\text{C-F}} = 276.0$  Hz), 157.9, 133.0, 133.0, 131.3, 131.2 (d,  $J_{\text{C-F}} = 26.0$  Hz), 130.3, 128.8 (d,  $J_{\text{C-F}} = 1.9$  Hz), 125.8 (d,  $J_{\text{C-F}} = 8.2$  Hz), 120.8, 111.4, 105.9 (d,  $J_{\text{C-F}} = 4.3$  Hz), 55.8.

$^{19}\text{F}$  NMR ( $\text{CDCl}_3$ , 376 MHz) *E* isomer  $\delta$ : -101.6 (d,  $J = 34.7$  Hz), *E* isomer  $\delta$ : -82.6 (d,  $J = 21.7$  Hz).

HRMS (DART+,  $[\text{M}+\text{H}]^+$ ) Calcd for  $\text{C}_{16}\text{H}_{14}\text{FO}_2$ : 257.0972. Found: 257.0971.

**(Z)-1-(3-Chloro-4-methoxyphenyl)-3-fluoro-3-phenylprop-2-en-1-one (3ka).**

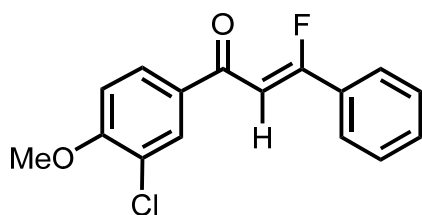

This compound was synthesized by following the typical procedure, except that **1k** was used instead of **1a**. This product **3la** was obtained as a mixture of *E/Z* isomers ( $Z/E = >20/1$ ), which was determined by  $^{19}\text{F}$  NMR. Corresponding alkynyl ketone **5ka** was also formed as a side product in 17% yield.

Yellow solid (31.3 mg, 54%).  $R_f$  0.2 ( $\text{SiO}_2$ , Hexane/EtOAc = 9/1). M.p. 138–140 °C.

$^1\text{H}$  NMR ( $\text{CDCl}_3$ , 400 MHz)  $\delta$ : 8.01 (d,  $J = 2.1$  Hz, 1H), 7.89 (dd,  $J = 8.6, 1.9$  Hz, 1H), 7.74 (d,  $J = 7.1$  Hz, 2H), 7.51-7.45 (m, 3H), 6.99 (d,  $J = 8.7$  Hz, 1H), 6.72 (d,  $J = 34.1$  Hz, 1H), 3.97 (s, 3H).

$^{13}\text{C}$  NMR  $\{^1\text{H}\}$  ( $\text{CDCl}_3$ , 101 MHz)  $\delta$ : 186.3, 165.2 (d,  $J_{\text{C-F}} = 274.5$  Hz), 158.6, 131.9, 131.6, 130.7 (d,  $J_{\text{C-F}} = 25.5$  Hz), 130.6, 128.9 (d,  $J_{\text{C-F}} = 1.9$  Hz), 128.9, 125.8 (d,  $J_{\text{C-F}} = 8.2$  Hz), 122.8, 111.3, 101.2 (d,  $J_{\text{C-F}} = 7.2$  Hz), 56.4.

$^{19}\text{F}$  NMR ( $\text{CDCl}_3$ , 376 MHz) *Z* isomer  $\delta$ : -99.6 (d,  $J = 34.0$  Hz), *E* isomer  $\delta$ : -82.1 (d,  $J = 21.7$  Hz).

IR (ATR): 1667 m, 1609 s, 1593 s, 1496 m, 1449 w, 1409 w, 1344 w, 1276 s, 1202 m, 1058 m, 1012 m, 808 m, 767 m, 701 m, 596 w, 490 w.

MS,  $m/z$  (relative intensity, %): 292 ( $\text{M}^+ + 2$ , 16), 291 (41), 290 ( $\text{M}^+$ , 50), 289 (100), 247 (11), 183 (10), 171 (10), 169 (31), 149 (69), 126 (16), 121 (15), 111 (810), 101 (49), 77 (19), 75 (19), 63 (16).

HRMS (DART+,  $[\text{M}+\text{H}]^+$ ) Calcd for  $\text{C}_{16}\text{H}_{13}^{35}\text{ClFO}$ : 291.0583. Found: 291.0583.

**(Z)-1-(Dibenzo[b,d]furan-4-yl)-3-fluoro-3-phenylprop-2-en-1-one (3la).**

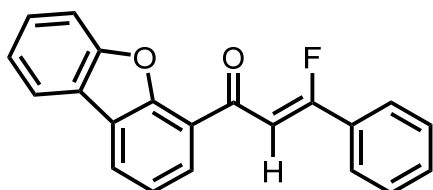

This compound was synthesized by following the typical procedure, except that **1l** was used instead

of **1a**. This product **3la** was obtained as a mixture of *E/Z* isomers (*Z/E* =>20/1), which was determined by <sup>19</sup>F NMR, together with an unidentified byproduct (<5%) that could not be separated. Corresponding alkynyl ketone **5la** was also formed as a side product in 16% yield.

Pale yellow solid (33.7 mg, 53%). R<sub>f</sub> 0.41 (SiO<sub>2</sub>, Hexane/EtOAc = 9/1). M.p. 145–146 °C.

<sup>1</sup>H NMR (CDCl<sub>3</sub>, 400 MHz) δ: 8.14 (dd, *J* = 7.6, 1.4 Hz, 1H), 8.10 (dd, *J* = 7.7, 1.3 Hz, 1H), 8.00–7.98 (m, 1H), 7.86–7.84 (m, 2H), 7.65 (m, 1H), 7.57–7.38 (m, 7H).

<sup>13</sup>C NMR {<sup>1</sup>H} (CDCl<sub>3</sub>, 101 MHz) δ: 185.4, 165.7 (d, *J*<sub>C-F</sub> = 278.4 Hz), 156.0, 154.0, 131.7, 131.2 (d, *J*<sub>C-F</sub> = 25.5 Hz), 128.9 (d, *J*<sub>C-F</sub> = 1.9 Hz), 128.2, 127.8, 126.0 (d, *J*<sub>C-F</sub> = 7.7 Hz), 125.6, 125.1, 124.1, 123.4, 123.3, 123.0, 120.7, 111.8, 104.4 (d, *J*<sub>C-F</sub> = 3.9 Hz).

<sup>19</sup>F NMR (CDCl<sub>3</sub>, 376 MHz) *Z* isomer δ: -98.9 (d, *J* = 34.0 Hz), *E* isomer δ: -78.6 (d, *J* = 21.7 Hz).

IR (ATR): 1667 s, 1608 s, 1494 m, 1450 m, 1412 m, 1287 s, 1224 m, 1181 s, 1115 m, 1057 w, 1031 w, 996 m, 910 w, 843 m, 754 s, 687 m, 637 w, 557 m, 496 w.

MS, *m/z* (relative intensity, %): 317 (10), 316 (M<sup>+</sup>, 58), 315 (100), 306 (16), 288 (15), 287 (16), 259 (10), 195 (19), 162 (10), 158 (26), 149 (57), 148 (10), 143 (10), 139 (60), 138 (11), 121 (19), 120 (10), 101 (59), 75 (12), 63 (11).

HRMS (DART+, [M+H]<sup>+</sup>) Calcd for C<sub>21</sub>H<sub>14</sub>FO<sub>2</sub>: 317.0972. Found: 317.0969.

#### (*Z*)-3-Fluoro-1-(9-methyl-9H-carbazol-3-yl)-3-phenylprop-2-en-1-one (**3ma**).

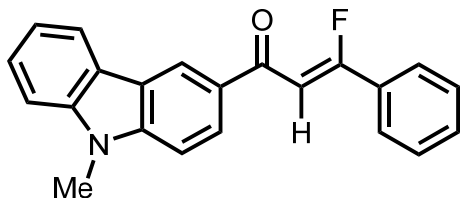

This compound was synthesized by following the typical procedure, except that **1m** was used instead of **1a** and AgBF<sub>4</sub> 15 mol% was used. This product **3la** was obtained as a mixture of *E/Z* isomers (*Z/E* =>20/1), which was determined by <sup>19</sup>F NMR. Corresponding alkynyl ketone **5ma** was also formed as a side product in 16% yield.

Pale yellow solid (24.2 mg, 43%). R<sub>f</sub> 0.15 (SiO<sub>2</sub>, Hexane/EtOAc = 9/1). M.p. 58–60 °C.

<sup>1</sup>H NMR (CDCl<sub>3</sub>, 400 MHz) δ: 8.74 (s, 1H), 8.16 (d, *J* = 7.8 Hz, 2H), 7.81–7.79 (m, 2H), 7.54–7.47 (m, 4H), 7.42 (t, *J* = 8.0 Hz, 2H), 7.31 (t, *J* = 7.4 Hz, 1H), 6.93 (d, *J* = 34.6 Hz, 1H), 3.87 (s, 3H).

<sup>13</sup>C NMR {<sup>1</sup>H} (CDCl<sub>3</sub>, 101 MHz) δ: 188.3, 164.1 (d, *J*<sub>C-F</sub> = 275.5 Hz), 143.7, 141.7, 131.3 (d, *J*<sub>C-F</sub> = 26.5 Hz), 131.2, 129.9, 128.9 (d, *J*<sub>C-F</sub> = 1.9 Hz), 126.7, 126.5, 125.7 (d, *J*<sub>C-F</sub> = 7.7 Hz), 123.0, 122.6, 121.9, 120.6, 120.0, 109.0, 108.2, 102.4 (d, *J*<sub>C-F</sub> = 7.7 Hz), 29.3.

<sup>19</sup>F NMR (CDCl<sub>3</sub>, 376 MHz) *Z* isomer δ: -101.9 (d, *J* = 34.7 Hz), *E* isomer δ: -86.0 (d, *J* = 21.7 Hz).

IR (ATR): 3058 w, 1770 w, 1664 s, 1592 s, 1495 m, 1366 m, 1324 m, 1247 s, 1187 m, 1122 m, 995 m, 914 w, 807 w, 770 s, 749 m, 687 m, 602 w, 542 w.

MS,  $m/z$  (relative intensity, %): 330 (26), 329 ( $M^+$ , 100), 328 (38), 302 (10), 301 (47), 300 (13), 285 (10), 208 (45), 181 (17), 180 (29), 164 (20), 152 (31), 151 (11), 149 (13), 142 (10), 101 (18).

HRMS (DART+,  $[M+H]^+$ ) Calcd for  $C_{22}H_{17}FNO$ : 330.1289. Found: 330.1287.

**(Z)-1-(9-Acetyl-9H-carbazol-3-yl)-3-fluoro-3-phenylprop-2-en-1-one (3na).**

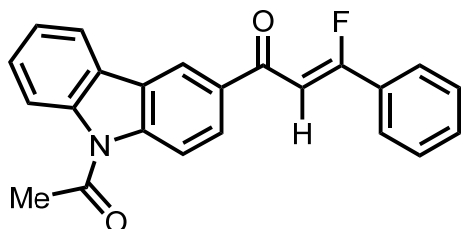

This compound was synthesized by following the typical procedure, except that **1n** was used instead of **1a** and  $AgBF_4$  15 mol% was used. This product **3la** was obtained as a mixture of *E/Z* isomers (*Z/E* = >20/1), which was determined by  $^{19}F$  NMR. Corresponding alkynyl ketone **5na** was also formed as a side product in 14% yield.

Yellow solid (29.4 mg, 41%).  $R_f$  0.12 ( $SiO_2$ , Hexane/EtOAc = 9/1). M.p. 63–64 °C.

$^1H$  NMR ( $CDCl_3$ , 400 MHz)  $\delta$ : 8.63 (d,  $J = 1.4$  Hz, 1H), 8.36 (d,  $J = 8.9$  Hz, 1H), 8.17 (d,  $J = 8.2$  Hz, 1H), 8.13–8.09 (m, 2H), 7.81–7.79 (m, 2H), 7.56–7.42 (m, 5H), 6.91 (d,  $J = 34.1$  Hz, 1H), 2.93 (s, 3H).

$^{13}C$  NMR  $\{^1H\}$  ( $CDCl_3$ , 101 MHz)  $\delta$ : 188.1, 170.1, 165.2 (d,  $J_{C-F} = 277.9$  Hz), 141.5, 139.1, 134.2, 131.6, 130.9 (d,  $J_{C-F} = 26.5$  Hz), 129.0 (d,  $J_{C-F} = 1.9$  Hz), 128.0 (d,  $J_{C-F} = 10.1$  Hz) 128.0, 127.9, 126.6, 126.0, 125.9, 125.8, 124.1, 120.4, 116.1 (d,  $J_{C-F} = 5.3$  Hz), 101.9 (d,  $J_{C-F} = 7.2$  Hz), 27.8.

$^{19}F$  NMR ( $CDCl_3$ , 376 MHz) *Z isomer*  $\delta$ : -99.5 (d,  $J = 34.0$  Hz), *E isomer*  $\delta$ : -82.3 (d,  $J = 21.7$  Hz).

IR (ATR): 1734 w, 1698 s, 1668 s, 1606 s, 1484 m, 1451 m, 1425 m, 1368 s, 1291 s, 1242 s, 1197 s, 1009 s, 913 w, 812 w, 751 m, 687 m, 619 w, 542 w.

MS,  $m/z$  (relative intensity, %): 358 (33), 357 ( $M^+$ , 92), 337 (10), 316 (23), 315 (100), 314 (83), 298 (16), 295 (18), 288 (17), 287 (78), 286 (36), 285 (18), 284 (13), 267 (21), 266 (13), 264 (11), 195 (14), 194 (44), 193 (24), 167 (39), 166 (44), 165 (20), 164 (17), 157 (12), 149 (47), 140 (23), 139 (45), 138 (15), 137 (12), 129 (10), 121 (17), 120 (11), 102 (12), 101 (51), 51 (10).

HRMS (DART+,  $[M+H]^+$ ) Calcd for  $C_{23}H_{17}FNO_2$ : 358.1238. Found: 358.1233.

**(Z)-1-Fluoro-1-phenyldodec-1-en-3-one (3oa).**

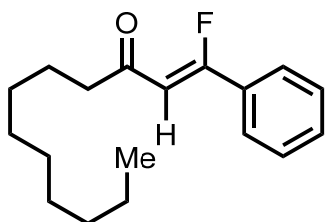

This compound was synthesized by following the typical procedure, except that **1o** was used instead

of **1a**. This product **3ga** was obtained as a mixture of *E/Z* isomers (*Z/E* = >20/1), which was determined by <sup>19</sup>F NMR. Corresponding alkynyl ketone **5oa** was also formed as a side product in 20% yield.

Pale yellow oil (31.1 mg, 58%). *R*<sub>f</sub> 0.63 (SiO<sub>2</sub>, Hexane/EtOAc = 9/1).

<sup>1</sup>H NMR (CDCl<sub>3</sub>, 400 MHz) δ: 7.68-7.65 (m, 2H), 7.51-7.42 (m, 3H), 6.07 (d, *J* = 39.2 Hz, 1H), 2.78 (td, *J* = 7.4, 2.4 Hz, 2H), 1.70-1.63 (m, 2H), 1.30-1.27 (m, 12H), 0.88 (t, *J* = 6.9 Hz, 3H).

<sup>13</sup>C NMR {<sup>1</sup>H, <sup>19</sup>F} (CDCl<sub>3</sub>, 101 MHz) δ: 199.2, 164.8, 131.5, 130.6, 128.9, 125.7, 106.4, 43.8, 31.9, 29.5, 29.3, 29.3, 29.3, 24.1, 22.7, 14.1.

<sup>19</sup>F NMR (CDCl<sub>3</sub>, 376 MHz) δ: -99.5 (d, *J* = 39.0 Hz).

IR (ATR): 2984 w, 1769 w, 1737 s, 1447 w, 1372 m, 1301 w, 1234 s, 1097 w, 1043 s, 938 w, 848 w, 773 m, 634 w, 607 w, 468 w.

MS, *m/z* (relative intensity, %): 177 (14), 165 (18), 164 (99), 163 (83), 150 (34), 149 (100), 122 (13), 121 (25), 101 (53), 55 (13), 41 (14).

HRMS (DART+, [M+H]<sup>+</sup>) Calcd for C<sub>18</sub>H<sub>26</sub>FO: 277.1962. Found: 277.1960.

#### (*Z*)-1-Cyclohexyl-3-fluoro-3-phenylprop-2-en-1-one (**3pa**) [CAS: 2222483-39-6].<sup>1</sup>

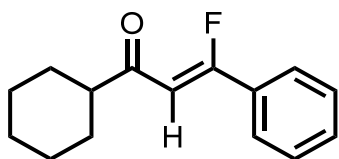

This compound was synthesized by following the typical procedure, except that **1p** was used instead of **1a**. This product **3pa** was obtained as a mixture of *E/Z* isomers (*Z/E* = >20/1), which was determined by <sup>19</sup>F NMR. Corresponding alkynyl ketone **5pa** was also formed as a side product in 22% yield.

Pale yellow oil (25.5 mg, 48%). *R*<sub>f</sub> 0.50 (SiO<sub>2</sub>, Hexane/EtOAc = 9/1).

<sup>1</sup>H NMR (CDCl<sub>3</sub>, 400 MHz) δ: 7.67-7.65 (m, 2H), 7.50-7.42 (m, 3H), 6.11 (d, *J* = 38.5 Hz, 1H), 2.82-2.76 (m, 1H), 1.95-1.92 (m, 2H), 1.84-1.81 (m, 2H), 1.73-1.69 (m, 1H), 1.46-1.19 (m, 5H).

<sup>13</sup>C NMR {<sup>1</sup>H} (CDCl<sub>3</sub>, 101 MHz) δ: 201.9 (d, *J*<sub>C-F</sub> = 1.9 Hz), 164.3 (d, *J*<sub>C-F</sub> = 275.1 Hz), 131.5, 130.9 (d, *J*<sub>C-F</sub> = 27.8 Hz), 128.9 (d, *J*<sub>C-F</sub> = 1.9 Hz), 125.8 (d, *J*<sub>C-F</sub> = 7.7 Hz), 105.0 (d, *J*<sub>C-F</sub> = 8.6 Hz), 51.0 (d, *J*<sub>C-F</sub> = 3.8 Hz), 28.8, 26.0, 25.9.

HRMS (DART+, [M+H]<sup>+</sup>) Calcd for C<sub>15</sub>H<sub>18</sub>FO: 233.1336. Found: 233.1336.

#### (*Z*)-1-(Adamantan-1-yl)-3-fluoro-3-phenylprop-2-en-1-one (**3qa**).

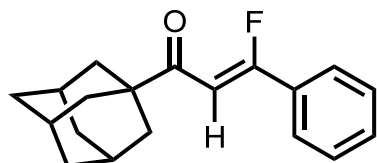

This compound was synthesized by following the typical procedure, except that **1q** was used instead

of **1a**. This product **3qa** was obtained as a mixture of *E/Z* isomers ( $Z/E = >20/1$ ), which was determined by  $^{19}\text{F}$  NMR. Corresponding alkynyl ketone **5qa** was also formed as a side product in 19% yield.

Pale yellow solid (32.4 mg, 57%).  $R_f$  0.64 ( $\text{SiO}_2$ , Hexane/EtOAc = 9/1). M.p. 91–93 °C.

$^1\text{H}$  NMR ( $\text{CDCl}_3$ , 400 MHz)  $\delta$ : 7.70–7.67 (m, 2H), 7.50–7.41 (m, 3H), 6.49 (d,  $J = 33.9$  Hz, 1H), 2.08 (s, 3H), 1.87 (d,  $J = 2.7$  Hz, 6H), 1.78–1.68 (m, 6H).

$^{13}\text{C}$  NMR  $\{^1\text{H}\}$  ( $\text{CDCl}_3$ , 101 MHz)  $\delta$ : 202.1, 165.2 (d,  $J_{\text{C-F}} = 276.5$  Hz), 131.3, 131.2 (d,  $J_{\text{C-F}} = 26.5$  Hz), 128.8 (d,  $J_{\text{C-F}} = 1.9$  Hz), 125.7 (d,  $J_{\text{C-F}} = 8.2$  Hz), 99.3 (d,  $J_{\text{C-F}} = 5.3$  Hz), 46.4, 38.1, 36.5, 27.9.

$^{19}\text{F}$  NMR ( $\text{CDCl}_3$ , 376 MHz) *Z isomer*  $\delta$ : -101.7 (d,  $J = 34.0$  Hz), *E isomer*  $\delta$ : -80.5 (d,  $J = 24.1$  Hz).

IR (ATR): 2901 s, 2849 m, 1684 s, 1612 s, 1577 m, 1496 w, 1449 m, 1347 w, 1277 m, 1197 w, 1159 m, 1059 w, 1032 m, 1012 s, 999 w, 973 w, 853 w, 766 m, 741 w, 687 m, 677 w, 591 m.

MS,  $m/z$  (relative intensity, %): 257 (13), 256 (68), 149 (38), 136 (70), 135 (100), 121 (11), 107 (51), 101 (37), 93 (86), 91 (23), 81 (23), 79 (87), 77 (27), 67 (32), 55 (18), 41 (22).

HRMS (DART+,  $[\text{M}+\text{H}]^+$ ) Calcd for  $\text{C}_{19}\text{H}_{22}\text{FO}$ : 285.1649. Found: 285.1651.

#### (1*Z*,4*E*)-1-Fluoro-1,5-diphenylpenta-1,4-dien-3-one (**3ra**).

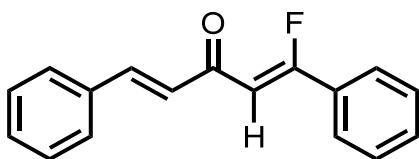

This compound was synthesized by following the typical procedure, except that **1r** was used instead of **1a**. This product **3ra** was obtained as a mixture of *E/Z* isomers ( $Z/E = 5/1$ ), which was determined by  $^{19}\text{F}$  NMR. Corresponding alkynyl ketone **5ra** was also formed as a side product in 10% yield.

Pale yellow oil (16.7 mg, 33%).  $R_f$  0.29 ( $\text{SiO}_2$ , Hexane/EtOAc = 9/1).

$^1\text{H}$  NMR ( $\text{CDCl}_3$ , 400 MHz)  $\delta$ : 7.73–7.69 (m, 3H), 7.64–7.60 (m, 2H), 7.53–7.39 (m, 6H), 7.28 (dd,  $J = 15.9, 1.3$  Hz, 1H), 6.33 (d,  $J = 37.3$  Hz, 1H).

$^{13}\text{C}$  NMR  $\{^1\text{H}\}$  ( $\text{CDCl}_3$ , 101 MHz)  $\delta$ : 187.5, 164.9 (d,  $J_{\text{C-F}} = 270.7$  Hz), 143.2, 134.8, 131.6, 130.8, 130.4, 128.9, 128.4, 126.1 (d,  $J_{\text{C-F}} = 5.8$  Hz), 125.8 (d,  $J_{\text{C-F}} = 8.2$  Hz), 106.1, 106.1.

$^{19}\text{F}$  NMR ( $\text{CDCl}_3$ , 376 MHz) *Z isomer*  $\delta$ : -99.5 (d,  $J = 37.6$  Hz), *E isomer*  $\delta$ : -82.1 (d,  $J = 21.7$  Hz).

IR (ATR): 3060 w, 3027 w, 1648 s, 1625 s, 1593 s, 1576 m, 1496 m, 1448 m, 1337 s, 1284 m, 1194 m, 1098 m, 1053 m, 1031 w, 979 m, 923 w, 874 w, 839 w, 767 m, 758 m, 726 w, 687 m, 634 w, 557 m, 490 w.

MS,  $m/z$  (relative intensity, %): 253 ( $\text{M}^+$ , 11), 252 (74), 251 (100), 203 (13), 202 (10), 149 (41), 147 (10), 146 (18), 131 (23), 121 (16), 109 (17), 103 (44), 102 (29), 101 (58), 91 (22), 77 (47), 76 (11), 75 (18), 51 (24).

HRMS (DART+,  $[\text{M}+\text{H}]^+$ ) Calcd for  $\text{C}_{17}\text{H}_{14}\text{FO}$ : 253.1023. Found: 253.1016.

**(Z)-3-Fluoro-3-(4-fluorophenyl)-1-(4-methoxyphenyl)prop-2-en-1-one (3ab).**

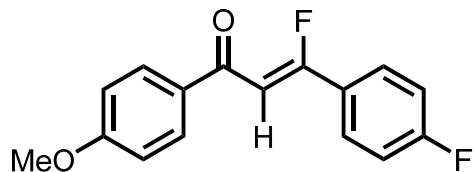

This compound was synthesized by following the typical procedure, except that **2b** was used instead of **2a**. This product **3ab** was obtained as a mixture of *E/Z* isomers (*Z/E* = 10/1), which was determined by  $^{19}\text{F}$  NMR. Corresponding alkynyl ketone **5ab** was also formed as a side product in 18% yield.

Pale yellow solid (30.2 mg, 55%).  $R_f$  0.17 (SiO<sub>2</sub>, Hexane/EtOAc = 9/1). M.p. 166–169 °C.

$^1\text{H}$  NMR (CDCl<sub>3</sub>, 400 MHz)  $\delta$ : 7.96 (d,  $J$  = 4.4 Hz, 2H), 7.75–7.71 (m, 2H), 7.15 (t,  $J$  = 8.5 Hz, 2H), 6.96 (dt,  $J$  = 9.5, 2.4 Hz, 2H), 6.68 (d,  $J$  = 34.3 Hz, 1H), 3.89 (d,  $J$  = 5.5 Hz, 3H).

$^{13}\text{C}$  NMR { $^1\text{H}$ } (CDCl<sub>3</sub>, 101 MHz)  $\delta$ : 187.2, 164.5 (d,  $J_{\text{C-F}}$  = 253.0 Hz), 163.6 (d,  $J_{\text{C-F}}$  = 276.0 Hz), 163.5, 131.3, 130.7, 127.9 (d,  $J_{\text{C-F}}$  = 17.3 Hz), 127.9, 127.2 (dd,  $J_{\text{C-F}}$  = 26.8, 2.9 Hz), 116.1 (d,  $J_{\text{C-F}}$  = 22.1 Hz), 113.8, 101.6 (d,  $J_{\text{C-F}}$  = 6.8 Hz).

$^{19}\text{F}$  NMR (CDCl<sub>3</sub>, 376 MHz)  $\delta$ : -100.6 (d,  $J$  = 34.7 Hz), -110.5.

IR (ATR): 2923 w, 1737 w, 1663 m, 1600 s, 1573 m, 1508 s, 1423 m, 1290 m, 1227 s, 1189 m, 1165 m, 1109 w, 1029 m, 889 w, 843 m, 813 s, 557 w, 508 w

MS,  $m/z$  (relative intensity, %): 274 (54), 273 (77), 246 (19), 231 (19), 167 (32), 139 (15), 135 (100), 119 (21), 108 (21), 107 (22), 92 (18), 77 (29).

HRMS (DART+, [M+H]<sup>+</sup>) Calcd for C<sub>16</sub>H<sub>13</sub>F<sub>2</sub>O<sub>2</sub>: 275.0878. Found: 275.0879.

**(Z)-3-(4-Chlorophenyl)-3-fluoro-1-(4-methoxyphenyl)prop-2-en-1-one (3ac).**

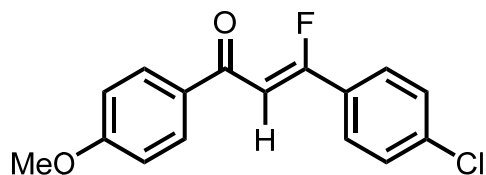

This compound was synthesized by following the typical procedure, except that **2c** was used instead of **2a**. This product **3ac** was obtained as a mixture of *E/Z* isomers (*Z/E* = 10/1), which was determined by  $^{19}\text{F}$  NMR. Corresponding alkynyl ketone **5ac** was also formed as a side product in 18% yield.

Pale yellow solid (35.0 mg, 60%).  $R_f$  0.15 (SiO<sub>2</sub>, Hexane/EtOAc = 9/1). M.p. 140–144 °C.

$^1\text{H}$  NMR (CDCl<sub>3</sub>, 400 MHz)  $\delta$ : 7.95 (d,  $J$  = 8.7 Hz, 2H), 7.66 (d,  $J$  = 8.5 Hz, 2H), 7.44 (s, 1H), 7.42 (s, 1H), 6.96 (d,  $J$  = 9.2 Hz, 2H), 6.71 (d,  $J$  = 34.3 Hz, 1H), 3.88 (s, 3H).

$^{13}\text{C}$  NMR { $^1\text{H}$ } (CDCl<sub>3</sub>, 101 MHz)  $\delta$ : 187.2, 163.6, 163.3 (d,  $J_{\text{C-F}}$  = 275.1 Hz), 137.5, 131.2, 130.7, 129.5 (d,  $J_{\text{C-F}}$  = 26.8 Hz), 129.2, 126.9 (d,  $J_{\text{C-F}}$  = 7.7 Hz), 113.8, 102.2 (d,  $J_{\text{C-F}}$  = 7.7 Hz), 55.5.

$^{19}\text{F}$  NMR (CDCl<sub>3</sub>, 376 MHz) *Z* isomer  $\delta$ : -101.8 (d,  $J$  = 34.7 Hz), *E* isomer  $\delta$ : -84.6 (d,  $J$  = 23.1 Hz).

IR (ATR): 1660 m, 1607 s, 1572 m, 1491 m, 1422 m, 1345 m, 1287 m, 1259 s, 1221 m, 1185 m, 1091

m, 1029 m, 1011 m, 889 m, 814 s, 768 w, 606 w, 502 w.

MS,  $m/z$  (relative intensity, %): 292 ( $M^+$ , 13), 291 (27), 290 (37), 289 (69), 262 (16), 247 (12), 183 (27), 135 (100), 120 (30), 108 (22), 107 (21), 92 (19), 77 (29).

HRMS (DART+,  $[M+H]^+$ ) Calcd for  $C_{16}H_{13}^{35}ClFO_2$ : 291.0583. Found: 291.0583.

**(Z)-3-(4-Bromophenyl)-3-fluoro-1-(4-methoxyphenyl)prop-2-en-1-one (3ad).**

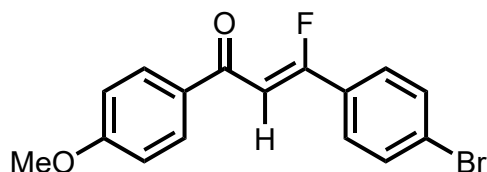

This compound was synthesized by following the typical procedure, except that **2d** was used instead of **2a** and alkyne (3equiv) was used. This product **3ad** was obtained as a mixture of *E/Z* isomers (*Z/E* = 8/1), which was determined by  $^{19}F$  NMR. Corresponding alkynyl ketone **5ad** was also formed as a side product in 17% yield. When 2 equiv of alkyne was used, the yield was slightly decreased.

Pale yellow solid (39.5 mg, 58%).  $R_f$  0.09 ( $SiO_2$ , Hexane/EtOAc = 9/1). M.p. 146–148 °C.

$^1H$  NMR ( $CDCl_3$ , 400 MHz)  $\delta$ : 7.95 (d,  $J$  = 7.0 Hz, 2H), 7.59 (s, 4H), 6.96 (d,  $J$  = 6.9 Hz, 2H), 6.72 (d,  $J$  = 34.4 Hz, 1H), 3.88 (s, 3H).

$^{13}C$  NMR  $\{^1H\}$  ( $CDCl_3$ , 101 MHz)  $\delta$ : 187.2, 163.6, 163.3, 132.2, 131.2, 130.8, 130.0, 127.1, 125.9, 113.8, 102.3, 55.5.

$^{19}F$  NMR ( $CDCl_3$ , 376 MHz) *Z isomer*  $\delta$ : -102.0 (d,  $J$  = 34.7 Hz), *E isomer*: -85.0 (d,  $J$  = 22.4 Hz).

IR (ATR): 2987 w, 1660 m, 1607 s, 1488 m, 1421 m, 1344 w, 1287 m, 1258 m, 1221 m, 1187 m, 1006 m, 889 w, 813 s, 773 m, 689 w, 601 w, 502 w.

MS,  $m/z$  (relative intensity, %): 336 ( $M^+$ , 100), 335 (53), 334 (27), 333 (52), 306 (11), 226 (11), 184 (11), 183 (11), 148 (18), 135 (100), 120 (31), 108 (25), 107 (21), 92 (21), 77 (31).

HRMS (DART+,  $[M+H]^+$ ) Calcd for  $C_{16}H_{13}^{79}BrFO_2$ : 335.0078. Found: 335.0077.

**(Z)-3-Fluoro-1-(4-methoxyphenyl)-3-(4-(trifluoromethyl)phenyl)prop-2-en-1-one (3ae).**

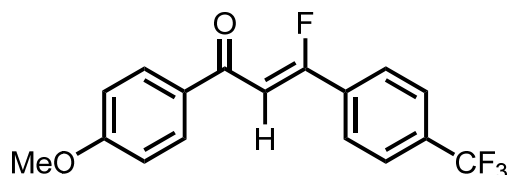

This compound was synthesized by following the typical procedure, except that **2e** was used instead of **2a** and  $AgBF_4$  30 mol% was used for 48 h. This product **3ae** was obtained as a mixture of *E/Z* isomers (*Z/E* = 10/1), which was determined by  $^{19}F$  NMR. Corresponding alkynyl ketone **5ae** was also formed as a side product in 25% yield.

Pae yellow solid (29.8 mg, 46%).  $R_f$  0.19 ( $SiO_2$ , Hexane/EtOAc = 9/1). M.p. 144–148 °C.

$^1\text{H}$  NMR ( $\text{CDCl}_3$ , 400 MHz)  $\delta$ : 7.99-7.96 (m, 2H), 7.85 (s, 1H), 7.83 (s, 1H), 7.74 (s, 1H), 7.71 (s, 1H), 6.99-6.96 (m, 2H), 6.79 (d,  $J = 34.3$  Hz, 1H), 3.89 (s, 3H).

$^{13}\text{C}$  NMR ( $\text{CDCl}_3$ , 101 MHz)  $\delta$ : 187.1, 163.8, 161.0, 134.4 (d,  $J_{\text{C-F}} = 27.8$  Hz), 132.8 (q,  $J_{\text{C-F}} = 32.6$  Hz), 130.9, 129.0 (d,  $J_{\text{C-F}} = 6.7$  Hz), 125.9, 125.1 (q,  $J_{\text{C-F}} = 3.7$  Hz), 123.6 (q,  $J_{\text{C-F}} = 272.5$  Hz), 113.9, 103.7 (d,  $J_{\text{C-F}} = 7.7$  Hz), 56.5.

$^{19}\text{F}$  NMR ( $\text{CDCl}_3$ , 376 MHz) *Z* isomer  $\delta$ : -65.9, -102.7 (d,  $J = 34.7$  Hz), *E* isomer  $\delta$ : -66.0, -85.4 (d,  $J = 23.1$  Hz).

IR (ATR): 1738 s, 1668 m, 1612 s, 1509 w, 1373 m, 1326 s, 1290 w, 1242 s, 1175 s, 1120 s, 1046 m, 1015 m, 849 m, 773 m, 506 w.

MS,  $m/z$  (relative intensity, %): 325 ( $\text{M}^+$ , 10), 324 (59), 323 (68), 296 (25), 281 (13), 217 (18), 169 (11), 135 (100), 120 (11), 108 (17), 107 (17), 92 (16), 77 (24).

HRMS (DART+,  $[\text{M}+\text{H}]^+$ ) Calcd for  $\text{C}_{17}\text{H}_{13}\text{F}_4\text{O}_2$ : 325.0846. Found: 325.0843.

**(*E*)-3-(2-Bromophenyl)-3-fluoro-1-(4-methoxyphenyl)prop-2-en-1-one (3af).**

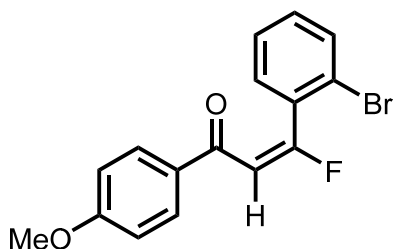

This compound was synthesized by following the typical procedure, except that **2f** was used instead of **2a** and alkyne **3** equiv was used. This product **3ga** was obtained as a mixture of *E/Z* isomers (*Z/E* = 1/2.5), which was determined by  $^{19}\text{F}$  NMR. Corresponding alkynyl ketone **5af** was also formed as a side product in 14% yield. When 2 equiv of alkyne was used, the yield was slightly decreased.

Pale yellow oil (45.6 mg, 68%).  $R_f$  0.12 ( $\text{SiO}_2$ , Hexane/EtOAc = 9/1).

$^1\text{H}$  NMR ( $\text{CDCl}_3$ , 400 MHz)  $\delta$ : 8.01 (d,  $J = 7.8$  Hz, 2H), 7.70 (d,  $J = 8.0$  Hz, 1H), 7.61 (d,  $J = 7.6$  Hz, 1H), 7.41 (t,  $J = 7.6$  Hz, 1H), 7.33 (t,  $J = 7.7$  Hz, 1H), 6.98-6.96 (m, 2H), 6.63 (dd,  $J = 34.0$ , 1.3 Hz, 1H), 3.88 (d,  $J = 1.1$  Hz, 3H)

$^{13}\text{C}$  NMR  $\{^1\text{H}, ^{19}\text{F}\}$  ( $\text{CDCl}_3$ , 101 MHz)  $\delta$ : 187.3, 163.7, 162.5, 134.0, 132.8, 131.8, 131.0, 130.9, 130.7, 127.6, 121.6, 113.8, 108.2, 55.5.

$^{19}\text{F}$  NMR ( $\text{CDCl}_3$ , 376 MHz)  $\delta$ : -89.3 (d,  $J = 34.0$  Hz).

IR (ATR): 1675 m, 1599 s, 1510 m, 1469 w, 1308 w, 1252 s, 1171 s, 1027 m, 996 m, 828 m, 785 s, 760 s, 580 w.

MS,  $m/z$  (relative intensity, %): 256 (18), 255 (100), 212 (21), 135 (41), 120 (27), 107 (14), 92 (25), 77 (34), 64 (16), 63 (12).

HRMS (DART+,  $[\text{M}+\text{H}]^+$ ) Calcd for  $\text{C}_{16}\text{H}_{13}^{79}\text{BrFO}_2$ : 335.0078. Found: 335.0075.

The stereochemistry of **3af** was determined by HOESY spectroscopy.

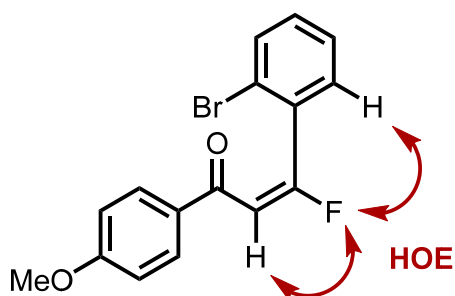

**(Z)-3-Fluoro-3-(3-methoxyphenyl)-1-(4-methoxyphenyl)prop-2-en-1-one (3ag).**

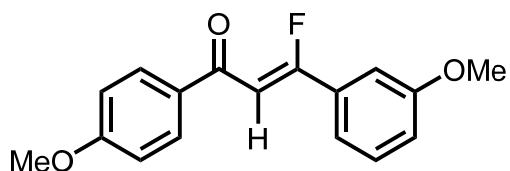

This compound was synthesized by following the typical procedure, except that **2g** was used instead of **2a** at 120 °C. This product **3ga** was obtained as a mixture of *E/Z* isomers (*Z/E* = 18/1), which was determined by <sup>19</sup>F NMR. Corresponding alkynyl ketone **5ag** was also formed as a side product in 20% yield.

Pale yellow solid (28.1 mg, 49%). *R*<sub>f</sub> 0.10 (SiO<sub>2</sub>, Hexane/EtOAc = 9/1). M.p. 55–58 °C.

<sup>1</sup>H NMR (CDCl<sub>3</sub>, 400 MHz) δ: 7.96 (d, *J* = 8.7 Hz, 2H), 7.39-7.31 (m, 2H), 7.23 (d, *J* = 1.8 Hz, 1H), 7.03 (dd, *J* = 7.9, 1.3 Hz, 1H), 6.99-6.95 (m, 2H), 6.72 (d, *J* = 34.4 Hz, 1H), 3.88 (s, 3H), 3.86 (s, 3H).

<sup>13</sup>C NMR {<sup>1</sup>H, <sup>19</sup>F} (CDCl<sub>3</sub>, 101 MHz) δ: 187.4, 164.2, 163.5, 159.8, 132.3, 131.4, 130.7, 129.9, 118.1, 117.0, 113.7, 111.1, 102.1, 55.5, 55.4.

<sup>19</sup>F NMR (CDCl<sub>3</sub>, 376 MHz) *Z isomer* δ: -100.6 (d, *J* = 34.7 Hz), *E isomer* δ: -85.4 (d, *J* = 22.4 Hz).

IR (ATR): 2839 w, 1667 m, 1599 s, 1509 m, 1489 m, 1456 w, 1258 m, 1233 s, 1170 s, 1046 m, 895 w, 822 m, 787 m, 691 w, 587 w, 509 w.

MS, *m/z* (relative intensity, %): 286 (50), 285 (72), 255 (19), 179 (20), 136 (29), 135 (100), 108 (29), 107 (36), 92 (31), 77 (52), 64 (17), 63 (14).

HRMS (DART+, [M+H]<sup>+</sup>) Calcd for C<sub>17</sub>H<sub>16</sub>FO<sub>3</sub>: 287.1078. Found: 287.1078.

**(3*R*,5*S*,7*R*,8*R*,9*S*,10*S*,12*S*,13*R*,14*S*,17*R*)-17-((*R,Z*)-7-Fluoro-5-oxo-7-phenylhept-6-en-2-yl)-10,13-dimethylhexadecahydro-1*H*-cyclopenta[*a*]phenanthrene-3,7,12-triyl triacetate (3sa).**

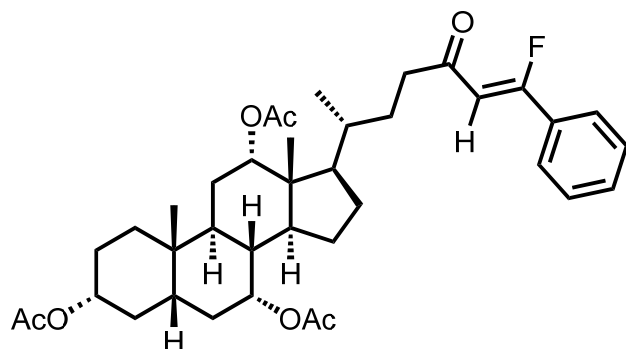

This compound was synthesized by following the typical procedure, except that **1s** was used instead of **1a** and  $\text{AgBF}_4$  10 mol% at 120 °C. This product **3sa** was obtained as a mixture of *E/Z* isomers (*Z/E* = >20/1), which was determined by  $^{19}\text{F}$  NMR. Corresponding alkynyl ketone **5sa** was also formed as a side product in 18% yield.

Pale yellow solid (46.0 mg, 36%).  $R_f$  0.15 ( $\text{SiO}_2$ , Hexane/EtOAc = 9/1). M.p. 80–83 °C.

$^1\text{H}$  NMR ( $\text{CDCl}_3$ , 400 MHz)  $\delta$ : 7.65–7.63 (m, 2H), 7.50–7.42 (m, 3H), 6.05 (d,  $J = 39.2$  Hz, 1H), 5.09 (s, 1H), 4.89 (d,  $J = 2.5$  Hz, 1H), 4.59–4.53 (m, 1H), 2.79–2.69 (m, 2H), 2.14 (s, 3H), 2.07 (s, 3H), 2.03 (s, 3H), 1.96–1.19 (m, 20H), 1.08–0.95 (m, 2H), 0.90 (s, 3H), 0.84 (t,  $J = 6.8$  Hz, 3H), 0.73 (s, 3H).

$^{13}\text{C}$  NMR  $\{^1\text{H}, ^{19}\text{F}\}$  ( $\text{CDCl}_3$ , 101 MHz)  $\delta$ : 198.9, 170.3, 170.3, 170.1, 164.6, 131.4, 130.3, 128.7, 125.5, 106.2, 75.2, 73.8, 70.5, 47.2, 44.9, 43.2, 40.7, 40.4, 37.5, 34.5, 34.5, 34.4, 34.1, 31.0, 29.6, 28.7, 27.0, 26.7, 25.4, 22.6, 22.3, 21.4, 21.3, 21.2, 17.5, 12.0.

$^{19}\text{F}$  NMR ( $\text{CDCl}_3$ , 376 MHz) *Z* isomer  $\delta$ : -99.4 (d,  $J = 39.0$  Hz), *E* isomer  $\delta$ : -81.3 (d,  $J = 22.4$  Hz).

IR (ATR): 2940 w, 2870 w, 2158 w, 1982 w, 1733 s, 1572 w, 1448 w, 1377 w, 1249 s, 1200 w, 1024 w, 773 w, 703 w, 455 m. 433 m, 418 m, 410 m.

HRMS ESI+,  $[\text{M}+\text{Na}]^+$  Calcd for  $\text{C}_{38}\text{H}_{51}\text{FO}_7\text{Na}$ : 661.3511. Found: 661.3512.

**(Z)-7-(2,5-Dimethylphenoxy)-1-fluoro-4,4-dimethyl-1-phenylhept-1-en-3-one (3ta).**

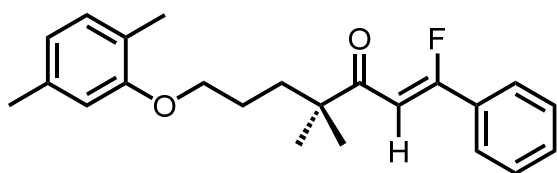

This compound was synthesized by following the typical procedure, except that **1t** was used instead of **1a** at 80 °C. This product **3ta** was obtained as a mixture of *E/Z* isomers (*Z/E* = >20/1), which was determined by  $^{19}\text{F}$  NMR. Corresponding alkynyl ketone **5ta** was also formed as a side product in 24% yield.

Pale yellow oil (15.7 mg, 31%).  $R_f$  0.37 ( $\text{SiO}_2$ , Hexane/EtOAc = 9/1).

$^1\text{H}$  NMR ( $\text{CDCl}_3$ , 400 MHz)  $\delta$ : 7.68–7.66 (m, 2H), 7.49–7.42 (m, 3H), 6.98 (d,  $J = 7.3$  Hz, 1H), 6.64 (d,  $J = 7.6$  Hz, 1H), 6.60 (s, 1H), 6.50 (d,  $J = 33.2$  Hz, 1H), 3.93 (t,  $J = 5.6$  Hz, 2H), 2.29 (s, 3H), 2.13

(s, 3H), 1.84-1.74 (m, 4H), 1.25 (s, 6H).

$^{13}\text{C}$  NMR  $\{^1\text{H}\}$  ( $\text{CDCl}_3$ , 101 MHz)  $\delta$ : 201.9, 165.4 (d,  $J_{\text{C-F}} = 277.0$  Hz), 156.8, 136.5, 131.4, 131.0 (d,  $J_{\text{C-F}} = 26.0$  Hz), 130.2, 128.8 (d,  $J_{\text{C-F}} = 1.4$  Hz), 125.7 (d,  $J_{\text{C-F}} = 7.7$  Hz), 123.4, 120.6, 111.8, 99.7 (d,  $J_{\text{C-F}} = 4.8$  Hz), 67.7, 47.3, 36.6, 24.9, 24.4, 21.4, 15.7.

$^{19}\text{F}$  NMR ( $\text{CDCl}_3$ , 376 MHz) *Z isomer*  $\delta$ : -101.0 (d,  $J = 48.4$  Hz), *E isomer*  $\delta$ : -78.5 (d,  $J = 23.1$  Hz).

IR (ATR): 2957 w, 1691 m, 1614 s, 1578 m, 1508 m, 1449 m, 1389 w, 1345 w, 1309 w, 1265 m, 1157 m, 1130 m, 1038 s, 804 m, 767 m, 688 m, 640 w, 587 w.

MS,  $m/z$  (relative intensity, %): 257 (13), 256 (68), 149 (38), 136 (70), 135 (100), 121 (11), 107 (51), 101 (37), 93 (86), 91 (23), 81 (23), 79 (87), 77 (27), 67 (32), 55 (18), 41 (22).

HRMS (DART+,  $[\text{M}+\text{H}]^+$ ) Calcd for  $\text{C}_{23}\text{H}_{28}\text{FO}_2$ : 355.2068. Found: 355.2074.

**(Z)-1-(6-(3-((3r,5r,7r)-Adamantan-1-yl)-4-methoxyphenyl)naphthalen-2-yl)-3-fluoro-3-phenylprop-2-en-1-one (3ua).**

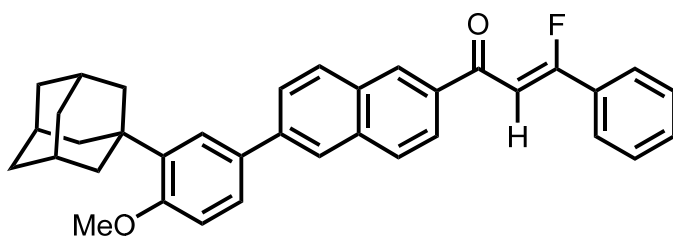

This compound was synthesized by following the typical procedure, except that **1u** was used instead of **1a**. This product **3ua** was obtained as a mixture of *E/Z* isomers ( $Z/E = >20/1$ ), which was determined by  $^{19}\text{F}$  NMR. Corresponding alkynyl ketone **5ua** was also formed as a side product in 18% yield.

Pale yellow solid (67.4 mg, 64%).  $R_f$  0.26 ( $\text{SiO}_2$ , Hexane/EtOAc = 9/1). M.p. 172–175 °C.

$^1\text{H}$  NMR ( $\text{CDCl}_3$ , 400 MHz)  $\delta$ : 8.48 (s, 1H), 8.09-7.95 (m, 4H), 7.82-7.74 (m, 3H), 7.62 (s, 1H), 7.56-7.50 (m, 4H), 7.01-6.91 (m, 2H), 3.91 (s, 3H), 2.20 (s, 6H), 2.12 (s, 3H), 1.82 (s, 6H).

$^{13}\text{C}$  NMR  $\{^1\text{H}, ^{19}\text{F}\}$  ( $\text{CDCl}_3$ , 101 MHz)  $\delta$ : 188.5, 165.1, 158.9, 141.6, 139.0, 136.0, 135.5, 132.4, 131.5, 131.2, 131.0, 129.9, 129.7, 128.9, 128.5, 126.5, 125.9, 125.8, 125.7, 124.7, 124.5, 112.1, 101.9, 55.1, 40.6, 37.2, 37.1, 29.1.

$^{19}\text{F}$  NMR ( $\text{CDCl}_3$ , 376 MHz) *Z isomer*  $\delta$ : -100.0 (d,  $J = 34.7$  Hz), *E isomer*  $\delta$ : -82.6 (d,  $J = 21.7$  Hz).

IR (ATR): 2901 s, 1667 s, 1604 s, 1472 m, 1342 w, 1285 s, 1237s, 1173 m, 1139 m, 1030 m, 907 s, 768 m, 730 s, 687 m, 648 w, 601 m.

HRMS (DART+,  $[\text{M}+\text{H}]^+$ ) Calcd for  $\text{C}_{36}\text{H}_{34}\text{FO}_2$ : 517.2537. Found: 517.2537.

## VI. Mechanistic Studies

### VI-I. Silver-catalyzed Friedel-Crafts acylation of anisole using **1a**

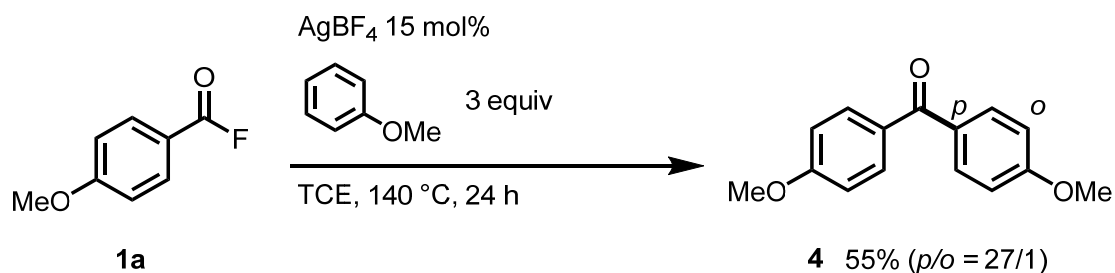

In a glove box filled with nitrogen,  $\text{AgBF}_4$  (5.7 mg, 0.030 mmol, 15 mol%) was added to a screw-capped vial and dissolved in TCE (1.0 mL). Acyl fluoride **1a** (30.8 mg, 0.20 mmol), anisole (64.9 mg, 0.60 mmol, 3 equiv) and TCE (1.0 mL) were then added to the vial. The screw-cap was closed and the vial was taken out from glove box. The reaction mixture was heated at 140 °C for 24 h. After the mixture was cooled to rt, all volatiles were removed in vacuo and the residue was purified by flash column chromatography to give **4**.

**Bis(4-methoxyphenyl)methanone (4) [CAS: 90-96-0].<sup>13</sup>**

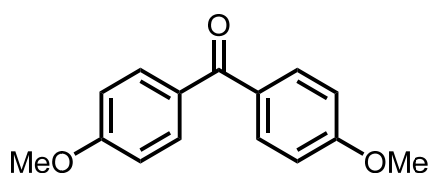

This product **4** was obtained as a mixture of regioisomers (*p/o* = 27/1), which was determined by <sup>1</sup>H NMR.

White solid (26.7 mg, 55%).  $R_f$  0,50 (SiO<sub>2</sub>, Hexane/EtOAc = 9/1).

<sup>1</sup>H NMR (CDCl<sub>3</sub>, 400 MHz)  $\delta$ : 7.78-7.77 (m, 4H), 6.98-6.94 (m, 4H), 3.88 (s, 6H).

<sup>13</sup>C NMR (CDCl<sub>3</sub>, 101 MHz)  $\delta$ : 194.4, 162.8, 132.2, 130.7, 113.4, 55.4.

HRMS (DART+, [M+H]<sup>+</sup>) Calcd for C<sub>15</sub>H<sub>15</sub>O<sub>3</sub>: 243.1016. Found: 243.1017.

**VI-II. Intermolecular insertion of 1a using AgSbF<sub>6</sub> in the presence of <sup>n</sup>Bu<sub>4</sub>NBF<sub>4</sub>**

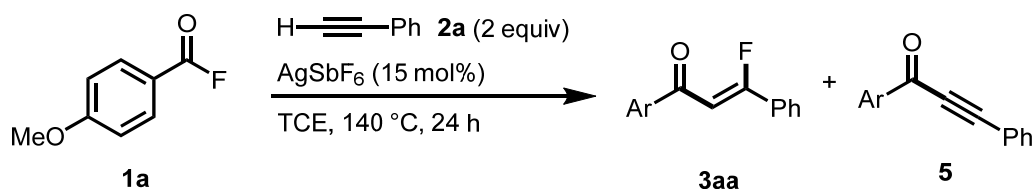

| deviation of reaction conditions                      | <b>3aa</b> (%) | <b>5</b> (%) | <b>1a</b> (%) |
|-------------------------------------------------------|----------------|--------------|---------------|
| none                                                  | 0              | 15           | 18            |
| <sup>n</sup> Bu <sub>4</sub> NBF <sub>4</sub> 1 equiv | 55             | 10           | 2             |

In a glove box filled with nitrogen, AgSbF<sub>6</sub> (5.7 mg, 0.030 mmol, 15 mol%) was added to a screw-capped vial and dissolved in TCE (1.0 mL). **1a** (30.8 mg, 0.20 mmol), **2a** (40.8 mg, 0.40 mmol, 2 equiv), and TCE (1.0 mL) were then added into the vial. The screw-cap was closed and the vial was taken out from glove box. The reaction mixture was heated at 140 °C for 24 h. After the mixture was cooled to rt, all volatiles were removed in vacuo and the residue was purified by flash column chromatography to give **5** (7.0 mg, 15%) with **1a** (5.6 mg, 18%) being recovered. The desired **3aa** was not observed.

When the same reaction was conducted with <sup>n</sup>Bu<sub>4</sub>NBF<sub>4</sub> (65.9 mg, 0.20 mmol, 1.0 equiv), **3aa** was obtained in 55% isolated yield (28 mg), along with **5** (4.7 mg, 10%) and recovered **1a** (0.6 mg, 2%).

### VI-III. Disproof of the intermediacy of alkynyl ketones using **1a** in the presence of **5ba**.

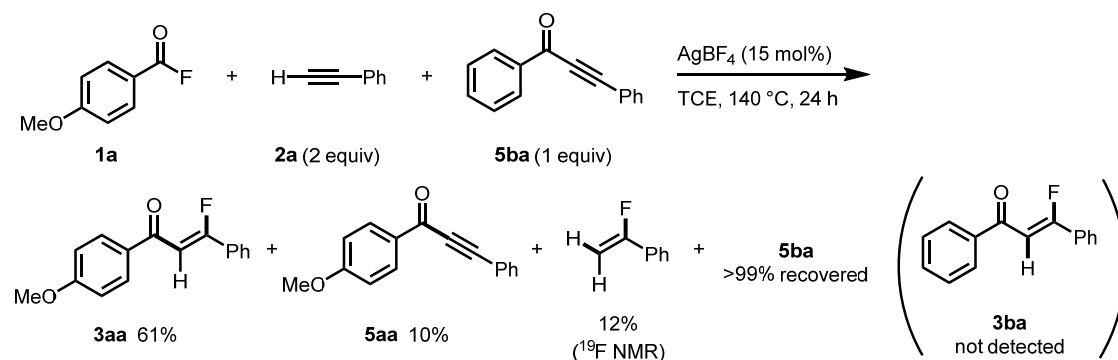

In a glove box filled with nitrogen, AgBF<sub>4</sub> (5.7 mg, 0.030 mmol, 15 mol%) was added to a screw-capped vial and dissolved in TCE (1.0 mL). **1a** (30.8 mg, 0.20 mmol), **2a** (40.8 mg, 0.40 mmol, 2 equiv), **5ba** (41.2 mg, 0.20 mmol, 1 equiv) and TCE (1.0 mL) were added into the vial. The screw-cap was closed and the vial was taken out from glove box. The reaction mixture was heated at 140 °C for 24 h. After the mixture was cooled to rt, all volatiles were removed in vacuo and the residue was purified by flash column chromatography to give **3aa** (31.2 mg, 61%), **5aa** (4.7 mg, 10%) and α-fluorostyrene (12% in <sup>19</sup>F NMR). HF adduct of **5ba** (i.e., **3ba**) was not observed, and **5ba** was quantitatively recovered. As outlined in Scheme 4, the formation of byproduct **5** is accompanied by the generation of a proton. We propose that this proton can protonate phenylacetylene (**2a**) to form a vinyl cation intermediate, which is subsequently trapped by BF<sub>4</sub><sup>-</sup> to afford the observed α-fluorostyrene. Notably, the yield of α-fluorostyrene (12%) closely matches that of byproduct **5aa** (10%), providing supporting evidence for a common origin involving proton generation. This correlation is consistent with the proposed mechanism.

#### VI-IV. Generation of AgBF<sub>4</sub> by reacting AgF and BF<sub>3</sub><sup>14</sup>

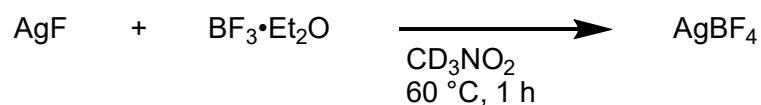

The formation of AgBF<sub>4</sub> from AgF and BF<sub>3</sub> was confirmed by NMR spectroscopy. In a glove box filled with nitrogen, AgF (3.7 mg, 0.030 mmol), BF<sub>3</sub>·Et<sub>2</sub>O (4.2 mg, 0.020 mmol) and PhCF<sub>3</sub> as an internal standard were added to a J-Young NMR tube and dissolved in CD<sub>3</sub>NO<sub>2</sub> (0.50 mL). The tube was sealed and removed from the glove box. The reaction mixture was heated at 60 °C for 1 h. The <sup>19</sup>F NMR spectrum of the reaction mixture was consistent with that of an authentic sample of AgBF<sub>4</sub>. Minor <sup>19</sup>F NMR signals observed downfield of the BF<sub>4</sub><sup>-</sup> species are attributed to F species bound to <sup>10</sup>B.<sup>15</sup>

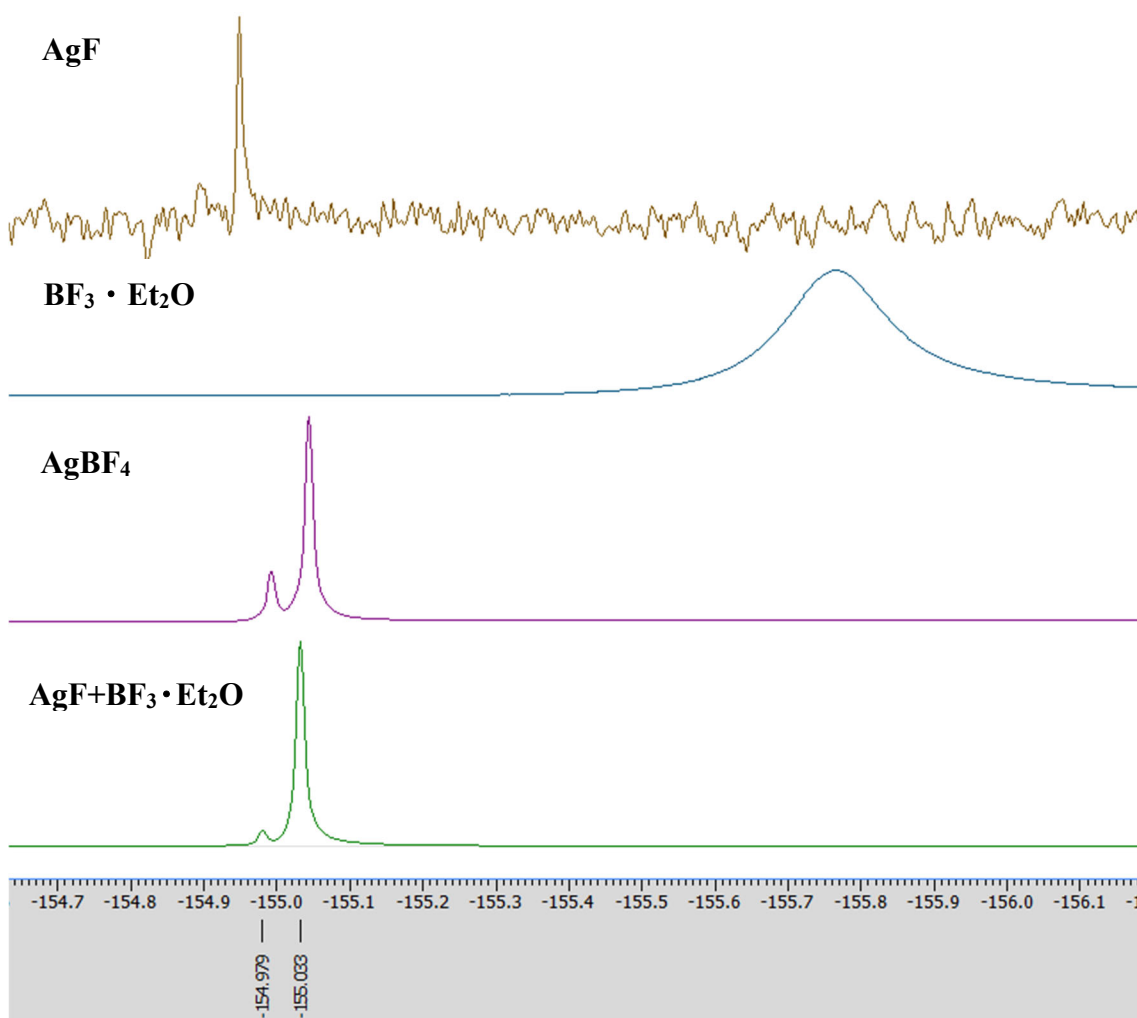

The in situ formation of  $\text{AgBF}_4$  from  $\text{AgF}$  and  $\text{BF}_3$  under the reaction conditions was further supported by the following experiments. In a glove box filled with nitrogen, the catalyst (0.030 mmol, 15 mol%) was added to a screw-capped vial and dissolved in TCE (1.0 mL). **1a** (30.8 mg, 0.20 mmol), **2a** (40.8 mg, 0.40 mmol, 2 equiv) and TCE (1.0 mL) were added into the vial. The screw-cap was closed and the vial was taken out from glove box. The reaction mixture was heated at 140 °C for 24 h. After cooling to room temperature, the reaction mixtures were analyzed by  $^{19}\text{F}$  NMR spectroscopy.  $\text{AgF}$  alone did not afford **3aa**; however, combining  $\text{AgF}$  with  $\text{BF}_3\cdot\text{OEt}_2$  resulted in a higher yield of **3aa** than that obtained using  $\text{BF}_3\cdot\text{OEt}_2$  alone. These results indicate that a more active catalyst,  $\text{AgBF}_4$ , is generated in situ from  $\text{AgF}$  and  $\text{BF}_3\cdot\text{OEt}_2$  under these conditions.

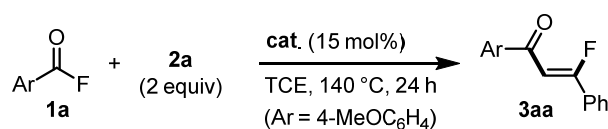

| cat.                                               | yield of <b>3aa</b> [%] | recovered <b>1a</b> [%] |
|----------------------------------------------------|-------------------------|-------------------------|
| $\text{AgF}$                                       | 0                       | >99                     |
| $\text{BF}_3\cdot\text{Et}_2\text{O}$              | 52                      | 2                       |
| $\text{AgF} + \text{BF}_3\cdot\text{Et}_2\text{O}$ | 60                      | 5                       |
| <b><math>\text{AgBF}_4</math></b>                  | <b>72</b>               | <b>3</b>                |

#### VI-V. *E/Z* isomerization of the product

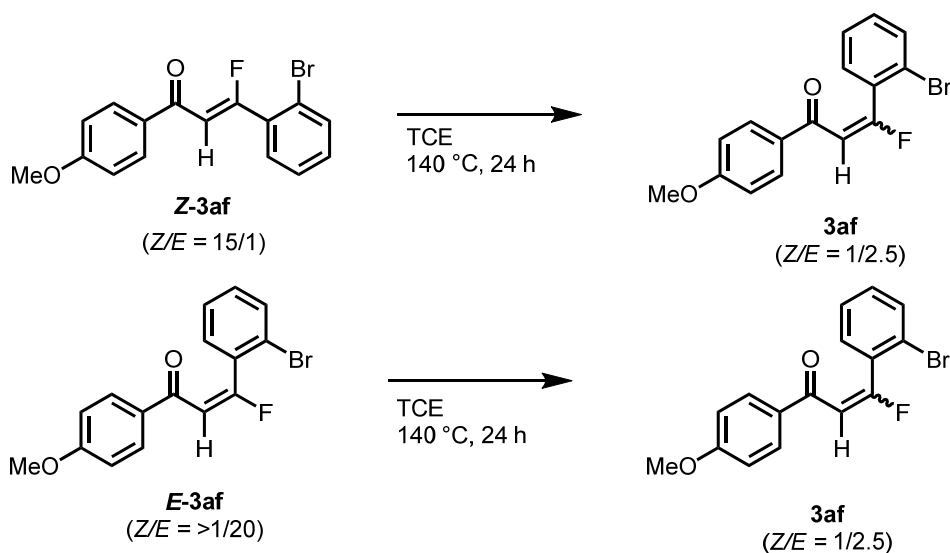

Independently prepared *E*- and *Z*-isomers of **3af** (35.0 mg, 0.10 mmol) were each dissolved in TCE (1.0 mL) in screw-capped vials and heated at 140 °C for 24 h. After cooling to room temperature, the reaction mixtures were analyzed by  $^{19}\text{F}$  NMR spectroscopy. In both cases, the same isomeric ratio ( $Z/E = 1/2.5$ ) was obtained in the absence of  $\text{AgBF}_4$ . These results indicate that thermal *E/Z* isomerization

occurs without a catalyst, and that the observed isomer ratio reflects the thermodynamic equilibrium between the two isomers.

#### VI-VI. NMR analysis of a mixture of acyl fluoride and AgBF<sub>4</sub>

<sup>1</sup>H, <sup>13</sup>C, and <sup>19</sup>F NMR spectra were recorded for CD<sub>2</sub>Cl<sub>2</sub> solutions of **1a** and a 1:1 mixture of **1a** and AgBF<sub>4</sub> (ca. 0.10 M). Comparison of these spectra revealed several downfield shifts upon addition of AgBF<sub>4</sub>, consistent with the formation of a coordination complex between **1a** and Ag<sup>+</sup>.

<sup>1</sup>H NMR

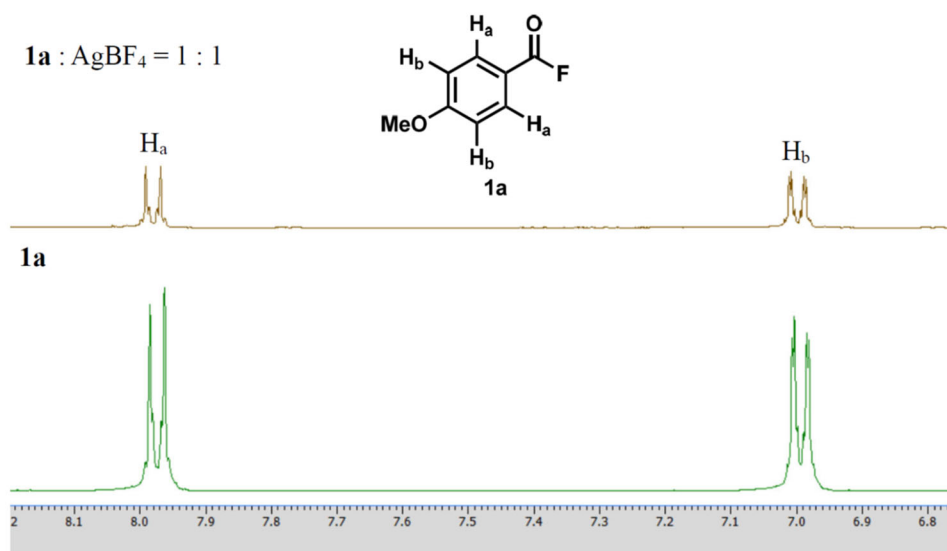

<sup>13</sup>C NMR

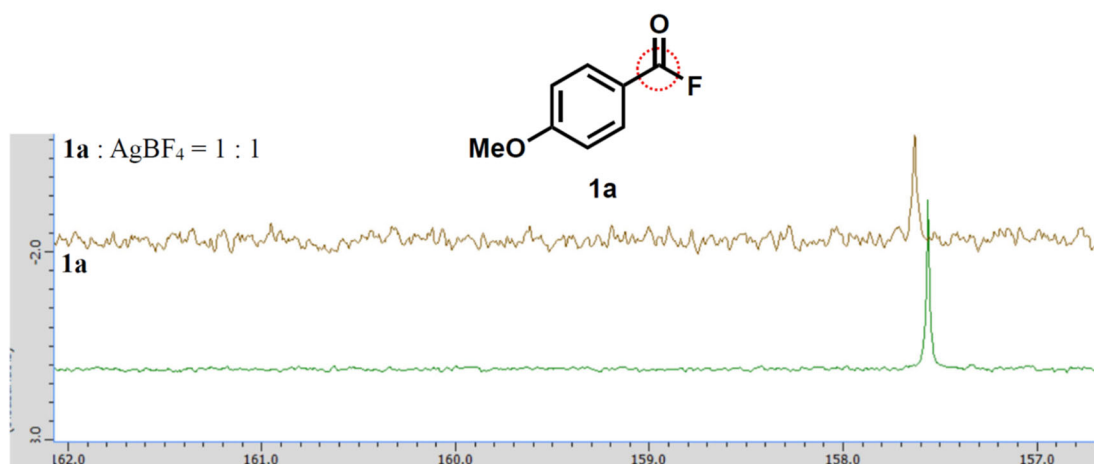

## $^{19}\text{F}$ NMR

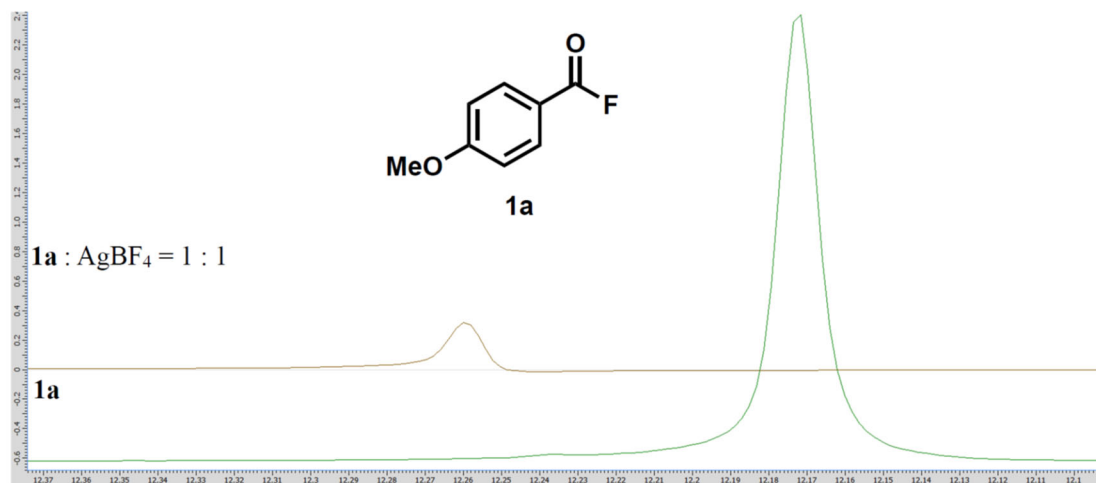

### 4-Methoxybenzoyl fluoride.

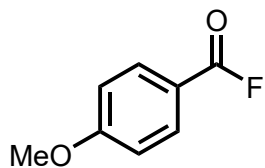

$^1\text{H}$  NMR ( $\text{CD}_2\text{Cl}_2$ , 400 MHz):  $\delta$  7.98 (d,  $J = 8.7$  Hz, 2H),  $\delta$  7.00 (dd,  $J = 8.9, 1.2$  Hz, 2H), 3.89 (s, 3H).

$^{13}\text{C}\{^{19}\text{F}\}$  NMR ( $\text{CD}_2\text{Cl}_2$ , 101 MHz):  $\delta$  165.707, 157.562, 134.003, 117.003, 114.775, 56.071.

$^{19}\text{F}$  NMR ( $\text{CD}_2\text{Cl}_2$ , 376 MHz):  $\delta$  12.2.

### 4-Methoxybenzoyl fluoride with $\text{AgBF}_4$ .

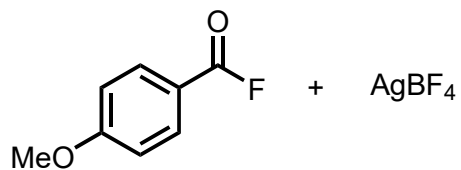

$^1\text{H}$  NMR ( $\text{CD}_2\text{Cl}_2$ , 400 MHz):  $\delta$  7.99 (d,  $J = 8.7$  Hz, 2H), 7.01 (dd,  $J = 8.5, 1.4, 1.2$  Hz, 2H), 3.89 (s, 3H).

$^{13}\text{C}\{^{19}\text{F}\}$  NMR ( $\text{CD}_2\text{Cl}_2$ , 101 MHz):  $\delta$  165.722, 157.634, 134.0222, 116.969, 114.770, 56.090.

$^{19}\text{F}$  NMR ( $\text{CD}_2\text{Cl}_2$ , 376 MHz):  $\delta$  12.3.

## VII. List of Unsuccessful Substrates

### VII-I. Limitation of acyl fluorides

#### • Benzyl acyl fluorides

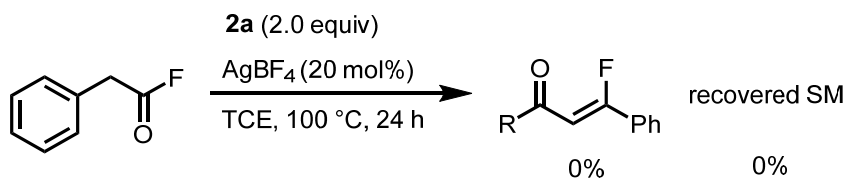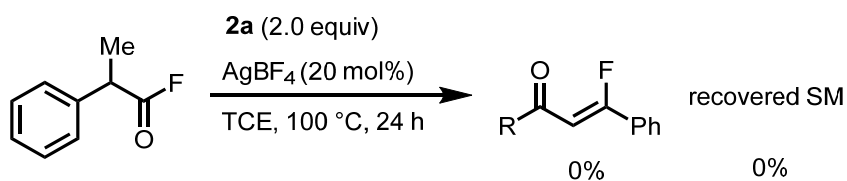

#### • Electron-deficient acyl fluorides

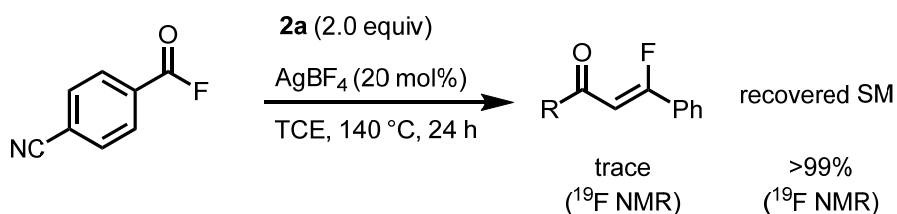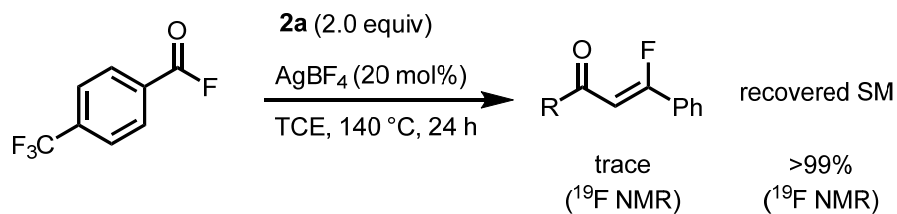

### VII-II. Limitation of alkynes

#### • Electron-rich terminal alkyne

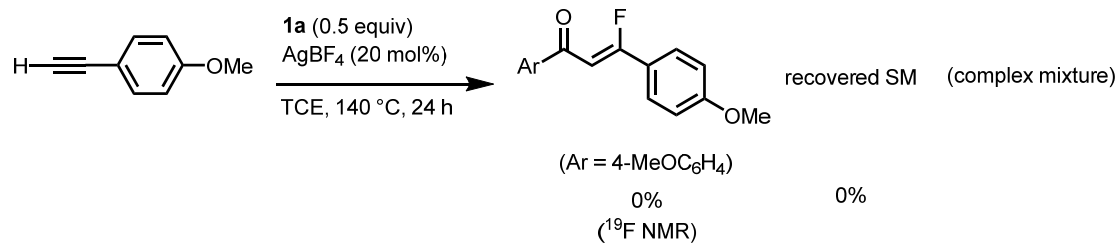

• Hetero-substituted terminal alkyne

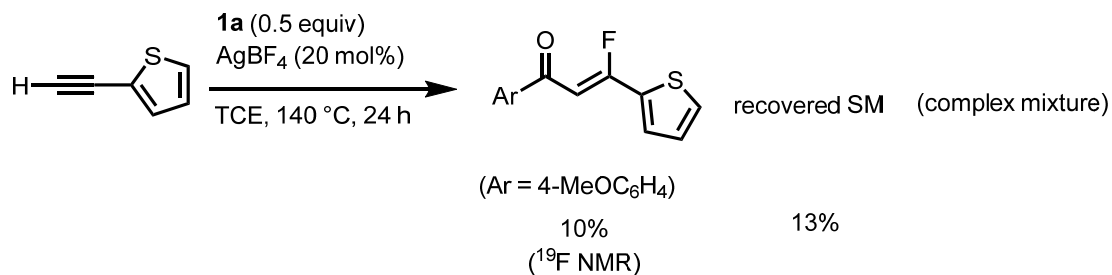

• Aliphatic terminal alkyne

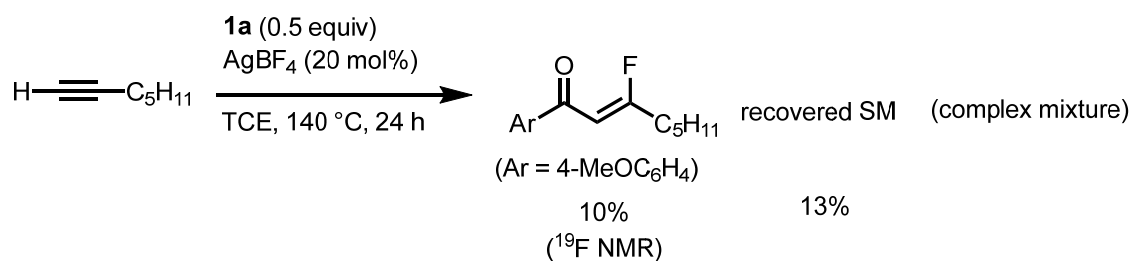

• Aromatic internal alkynes

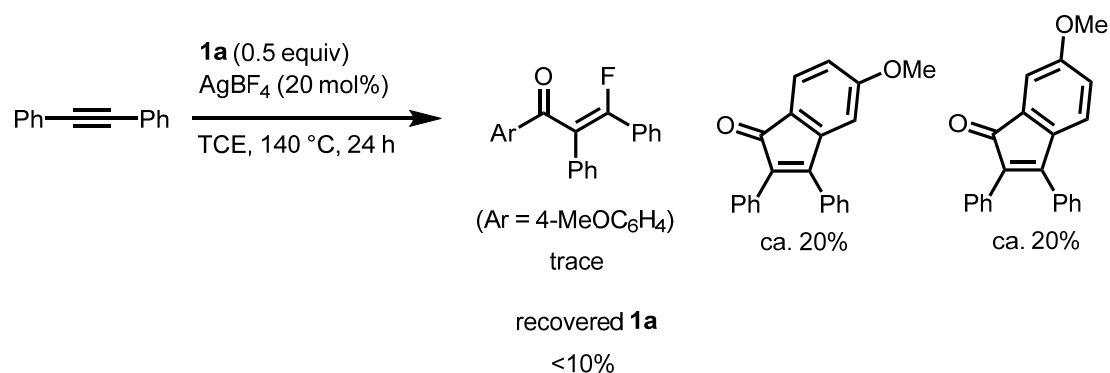

• Aliphatic internal alkyne

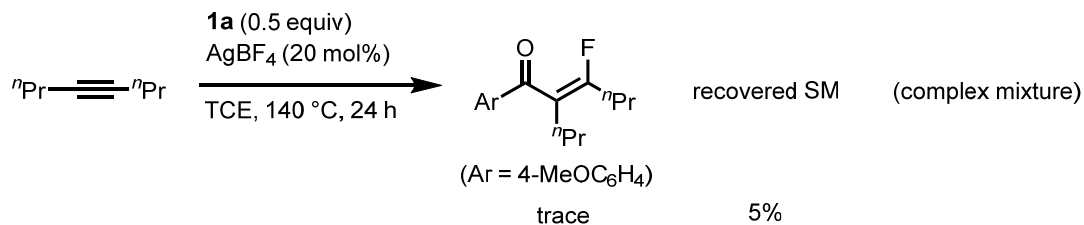

• Aryl-alkyl-substituted alkyne

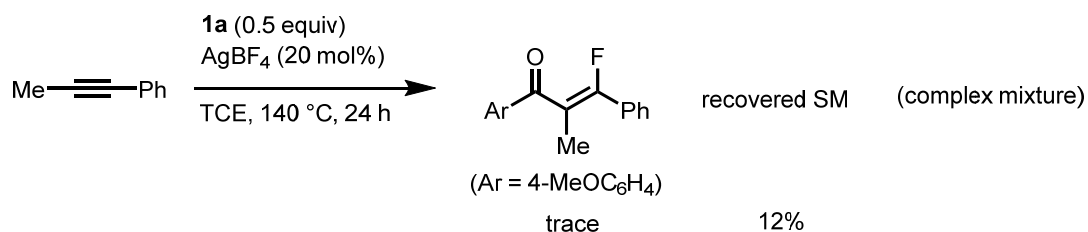

### VIII. DFT Calculations

#### VIII-I. Computational Details

Calculations were performed with the Gaussian 09 (G09) program. Geometry optimizations for all the reported structures were performed using M06-2X with the 6-31+G\* basis set and the frequency calculations were performed using M06-2X with the 6-31+G\* basis set.<sup>16</sup> PCM solvent effects were incorporated for all calculations with dichloroethane as the solvent. Single-point calculations on optimized geometries were separately calculated using M06-2X with the 6-31+G\* basis set. Energy changes were shown by the use of Gibbs free energies ( $T = 298.15$  K and  $P = 1$  atm).

#### VIII-II. Relative Gibbs Free Energies of 3ba

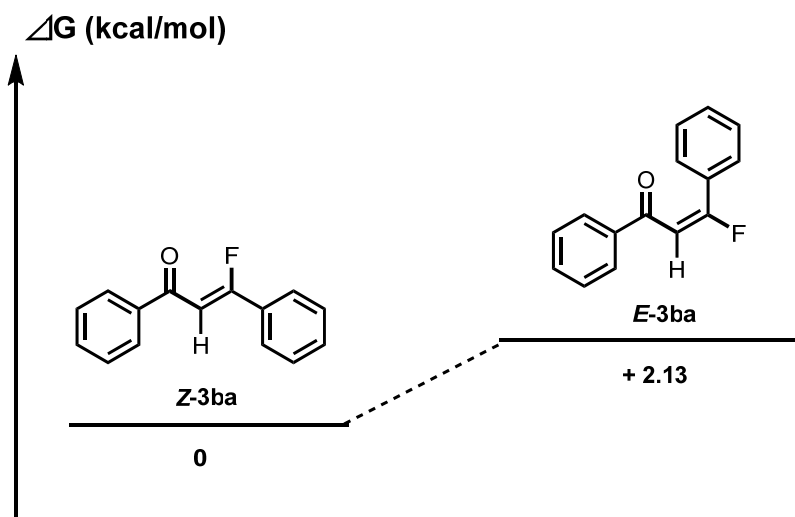

#### VIII-III. Relative Gibbs Free Energies of 3af

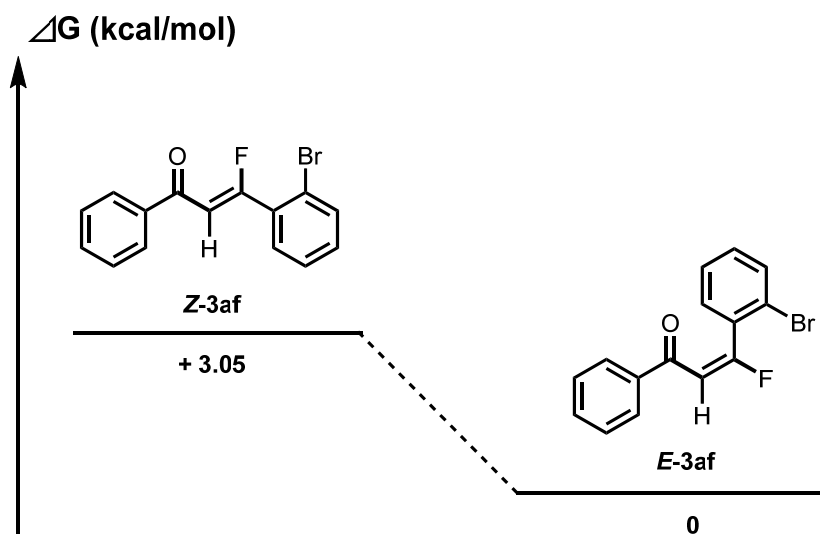

According to DFT calculations, the E isomer is more stable than the Z isomer, consistent with the experimental results. Although the E isomer is normally less stable due to steric repulsion between the carbonyl and phenyl groups, the isomer is stabilized by donation of the lone pair on the bromine atom into the  $\pi^*$  orbital of the carbonyl group.

#### VIII-IV. Cartesian coordinates of the optimized geometries and energies

• **3ba-Z** ( $G = -752.827987$  Hartree, no imaginary frequency)

|   |             |             |             |
|---|-------------|-------------|-------------|
| C | -0.01390100 | -0.19660300 | 0.22472500  |
| C | 1.18830800  | -0.74623500 | -0.00369300 |
| H | -0.04134600 | 0.86387500  | 0.44232200  |
| C | -1.29172500 | -0.94388200 | 0.19578600  |
| F | 1.26787900  | -2.04406100 | -0.34123300 |
| C | 2.50456300  | -0.08867400 | 0.02841100  |
| O | -1.34617200 | -2.18349600 | 0.30928500  |
| C | -2.55567200 | -0.14328300 | 0.04748600  |
| C | -2.56519600 | 1.16068100  | -0.46214800 |
| C | -3.77078100 | 1.84655900  | -0.60887000 |
| C | -4.96989400 | 1.24033000  | -0.23635100 |
| C | -4.96584600 | -0.06008900 | 0.27412900  |
| C | -3.76529100 | -0.75016700 | 0.40828000  |
| C | 3.62128900  | -0.75550400 | -0.49367200 |
| C | 4.87223900  | -0.14193100 | -0.48049100 |
| C | 5.02109700  | 1.13593800  | 0.05567900  |
| C | 3.91204500  | 1.80079400  | 0.58432200  |

|   |             |             |             |
|---|-------------|-------------|-------------|
| C | 2.66093500  | 1.19467600  | 0.57373800  |
| H | -1.64136000 | 1.64227800  | -0.76957000 |
| H | -3.77175700 | 2.85369800  | -1.01554100 |
| H | -5.90740800 | 1.77849500  | -0.34523500 |
| H | -5.89882100 | -0.53409900 | 0.56532100  |
| H | -3.74968700 | -1.76364500 | 0.79826400  |
| H | 3.51203700  | -1.74985200 | -0.91363000 |
| H | 5.73058700  | -0.66566500 | -0.89076000 |
| H | 5.99715100  | 1.61236500  | 0.06678300  |
| H | 4.02360400  | 2.79278600  | 1.01193200  |
| H | 1.81244800  | 1.71861800  | 1.00293800  |

• **3ba-E** (G = -752.824583 Hartree, no imaginary frequency)

|   |             |             |             |
|---|-------------|-------------|-------------|
| C | -4.40023900 | -1.20710500 | -0.45429800 |
| C | -4.96808800 | -0.31343500 | 0.45770900  |
| C | -4.18853300 | 0.69219400  | 1.02846800  |
| C | -2.84335500 | 0.81348900  | 0.68233400  |
| C | -2.26975800 | -0.08046800 | -0.22939400 |
| C | -3.05562100 | -1.09476200 | -0.79158400 |
| C | -0.82153300 | -0.01053000 | -0.60494400 |
| C | -0.10501700 | 1.25722100  | -0.32408000 |
| O | -0.27878200 | -0.95618800 | -1.15831000 |
| C | 1.21517300  | 1.36264500  | -0.12775700 |
| F | 1.71031200  | 2.62336300  | -0.05028600 |
| C | 2.26735700  | 0.35247600  | 0.06412900  |
| C | 2.01948400  | -0.81439500 | 0.79686900  |
| C | 3.03600200  | -1.74493200 | 0.98480900  |
| C | 4.30416800  | -1.51748300 | 0.44524300  |
| C | 4.55717700  | -0.34998800 | -0.27449600 |
| C | 3.54489300  | 0.58930700  | -0.45870600 |
| H | -5.00746900 | -1.98963500 | -0.89999300 |
| H | -6.01786400 | -0.40268900 | 0.72308100  |
| H | -4.62616100 | 1.38291000  | 1.74324700  |
| H | -2.24337000 | 1.59498700  | 1.13974200  |
| H | -2.60041000 | -1.78550500 | -1.49527800 |
| H | -0.67796800 | 2.17977400  | -0.32907100 |

|   |            |             |             |
|---|------------|-------------|-------------|
| H | 1.03744400 | -0.98561900 | 1.22792800  |
| H | 2.84099300 | -2.64585500 | 1.55903100  |
| H | 5.09533900 | -2.24716600 | 0.59254000  |
| H | 5.54339300 | -0.16764600 | -0.69112400 |
| H | 3.74086200 | 1.50027600  | -1.01686000 |

• **3af-Z** (G = -3438.496739 Hartree, no imaginary frequency)

|   |             |             |             |
|---|-------------|-------------|-------------|
| C | -4.14640300 | 1.41544700  | -0.26725500 |
| C | -5.19253100 | 0.48070800  | -0.26111000 |
| C | -4.92002700 | -0.87280100 | -0.01970000 |
| C | -3.60779400 | -1.27003100 | 0.21193300  |
| C | -2.55291500 | -0.35163500 | 0.19717700  |
| C | -2.84323600 | 1.00124900  | -0.04647300 |
| C | -1.17473500 | -0.85319700 | 0.46437600  |
| C | -0.04119500 | 0.04889400  | 0.14219600  |
| O | -0.99307800 | -1.97709600 | 0.91482700  |
| C | 1.20249900  | -0.09845500 | 0.61164500  |
| O | -6.42720100 | 0.97444500  | -0.49555300 |
| C | -7.52264800 | 0.06645700  | -0.49687200 |
| C | 2.33576800  | 0.80912900  | 0.33182600  |
| F | 1.51861100  | -1.09648100 | 1.45084700  |
| C | 3.55460700  | 0.34410600  | -0.17527000 |
| C | 4.61088900  | 1.21460000  | -0.41785300 |
| C | 4.45322400  | 2.57532400  | -0.15888600 |
| C | 3.24280500  | 3.06107500  | 0.33129300  |
| C | 2.19315900  | 2.18014900  | 0.57527600  |
| H | -4.38015700 | 2.46055900  | -0.44660000 |
| H | -5.71296000 | -1.61183900 | -0.01176300 |
| H | -3.38952600 | -2.31669500 | 0.40293600  |
| H | -2.05502300 | 1.74813900  | -0.04447500 |
| H | -0.20342900 | 0.88440500  | -0.52897900 |
| H | -8.40663700 | 0.66900300  | -0.70510300 |
| H | -7.40153200 | -0.69097200 | -1.27876500 |
| H | -7.62989100 | -0.41851900 | 0.47927500  |
| H | 5.54786500  | 0.83700000  | -0.81467300 |
| H | 5.28120300  | 3.25200600  | -0.34765200 |

|    |            |             |             |
|----|------------|-------------|-------------|
| H  | 3.11718400 | 4.12025000  | 0.53281800  |
| H  | 1.25149600 | 2.54487900  | 0.97591300  |
| Br | 3.77506700 | -1.48842300 | -0.59310200 |

• **3af-E** (G = -752.827987 Hartree, no imaginary frequency)

|    |             |             |             |
|----|-------------|-------------|-------------|
| C  | -1.87483300 | -1.24481600 | 1.57258700  |
| C  | -2.20846000 | 0.02030300  | 1.30948800  |
| H  | -2.56745700 | -1.84131100 | 2.16116200  |
| C  | -0.69669700 | -1.97373100 | 1.02880200  |
| C  | -1.54408300 | 1.05536500  | 0.49295300  |
| F  | -3.33509700 | 0.49885300  | 1.89574500  |
| O  | -0.82625500 | -3.15706100 | 0.74470200  |
| C  | 0.61017800  | -1.28458800 | 0.85207300  |
| C  | 1.02722700  | -0.23483600 | 1.68466800  |
| C  | -1.26694700 | 2.27992300  | 1.11771500  |
| C  | -0.57113100 | 3.28323500  | 0.45484500  |
| C  | -0.14222200 | 3.07410600  | -0.85560000 |
| C  | -0.43383000 | 1.87706000  | -1.50439300 |
| C  | -1.12512300 | 0.87451500  | -0.83005500 |
| H  | -0.35766300 | 4.21952400  | 0.96089400  |
| H  | 0.40550800  | 3.84752100  | -1.38565600 |
| H  | -0.12907600 | 1.72413500  | -2.53457700 |
| C  | 2.26292300  | 0.36188700  | 1.49888400  |
| C  | 3.10446600  | -0.07504900 | 0.46398400  |
| C  | 2.70338100  | -1.12600300 | -0.37167700 |
| C  | 1.46452400  | -1.72413100 | -0.16177200 |
| H  | 0.38600600  | 0.10901500  | 2.49223100  |
| H  | 2.59987200  | 1.16899400  | 2.14262300  |
| O  | 4.28322400  | 0.57561100  | 0.34887000  |
| H  | 3.33799500  | -1.47614900 | -1.17765600 |
| H  | 1.14536100  | -2.53879900 | -0.80605900 |
| C  | 5.17928400  | 0.16092000  | -0.67487700 |
| H  | 6.05224500  | 0.80722900  | -0.58490300 |
| H  | 5.47870100  | -0.88309800 | -0.53278800 |
| H  | 4.72847400  | 0.28861600  | -1.66499900 |
| Br | -1.60179900 | -0.67526500 | -1.81405300 |

## IX. References

- 1 L. Xu, Q. Zhang, Q. Xie, B. Huang, J.-J. Dai, J. Xu and H.-J. Xu, *Chem. Commun.*, 2018, **54**, 4406–4409.
- 2 Z. Wang, X. Wang and Y. Nishihara, *Chem. Commun.*, 2018, **54**, 13969–13972.
- 3 S. T. Keaveney and F. Schoenebeck, *Angew. Chem. Int. Ed.*, 2018, **57**, 4073–4077.
- 4 M. Cen, X. Yang, S. Zhang, L. Gan, L. Liu and T. Chen, *Org. Biomol. Chem.*, 2023, **21**, 9372–9378.
- 5 H.-X. Song, Z.-Y. Tian, J.-C. Xiao and C.-P. Zhang, *Chem. – Eur. J.*, 2020, **26**, 16261–16265.
- 6 G. S. Lal, G. P. Pez, R. J. Pesaresi and F. M. Prozonic, *Chem. Commun.*, 1999, 215–216.
- 7 C. Bonnefoy, A. Gallego, C. Delobel, B. Raynal, M. Decourt, E. Chefdeville, G. Hanquet, A. Panossian, F. R. Leroux, F. Toulgoat and T. Billard, *Eur. J. Org. Chem.*, 2024, **27**, e202400142.
- 8 Y. Huang, M. Yu, N. Sun, T. Tang, F. Yu, X. Song, Q. Xie, W. Fu, L. Shao and Y. Wang, *Eur. J. Med. Chem.*, 2018, **148**, 465–476.
- 9 V. Humne, Y. Dangat, K. Vanka and P. Lokhande, *Org. Biomol. Chem.*, 2014, **12**, 4832–4836.
- 10 H. Nagai, Y. Morita, Y. Shimizu and M. Kanai, *Org. Lett.*, 2016, **18**, 2276–2279.
- 11 J. Zhang, L. Liu, J. Duan, L. Gu, B. Chen, T. Sun and Y. Gong, *Adv. Synth. Catal.*, 2017, **359**, 4348–4358.
- 12 Y. Li, X. Liu, D. Ma, B. Liu and H. Jiang, *Adv. Synth. Catal.*, 2012, **354**, 2683–2688.
- 13 K. Tanaka, M. Kishimoto, Y. Hoshino and K. Honda, *Tetrahedron Lett.*, 2018, **59**, 1841–1845.
- 14 G. A. Olah and H. W. Quinn, *J. Inorg. Nucl. Chem.*, 1960, **14**, 295–296.
- 15 S. Tashiro, Y. Yamada, L. A. Kringe, Y. Okajima and M. Shionoya, *J. Am. Chem. Soc.*, 2024, **146**, 34501–34509.
- 16 R. Guo, X. Qi, H. Xiang, P. Geaneotes, R. Wang, P. Liu and Y.-M. Wang, *Angew. Chem. Int. Ed.*, 2020, **59**, 16651–16660.

## X. Copies of NMR Spectra

**<sup>1</sup>H NMR (400 MHz, CDCl<sub>3</sub>)**

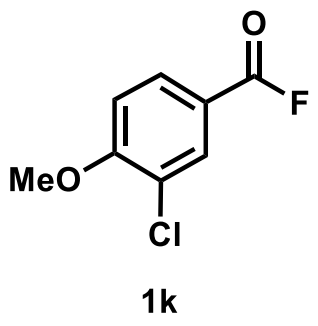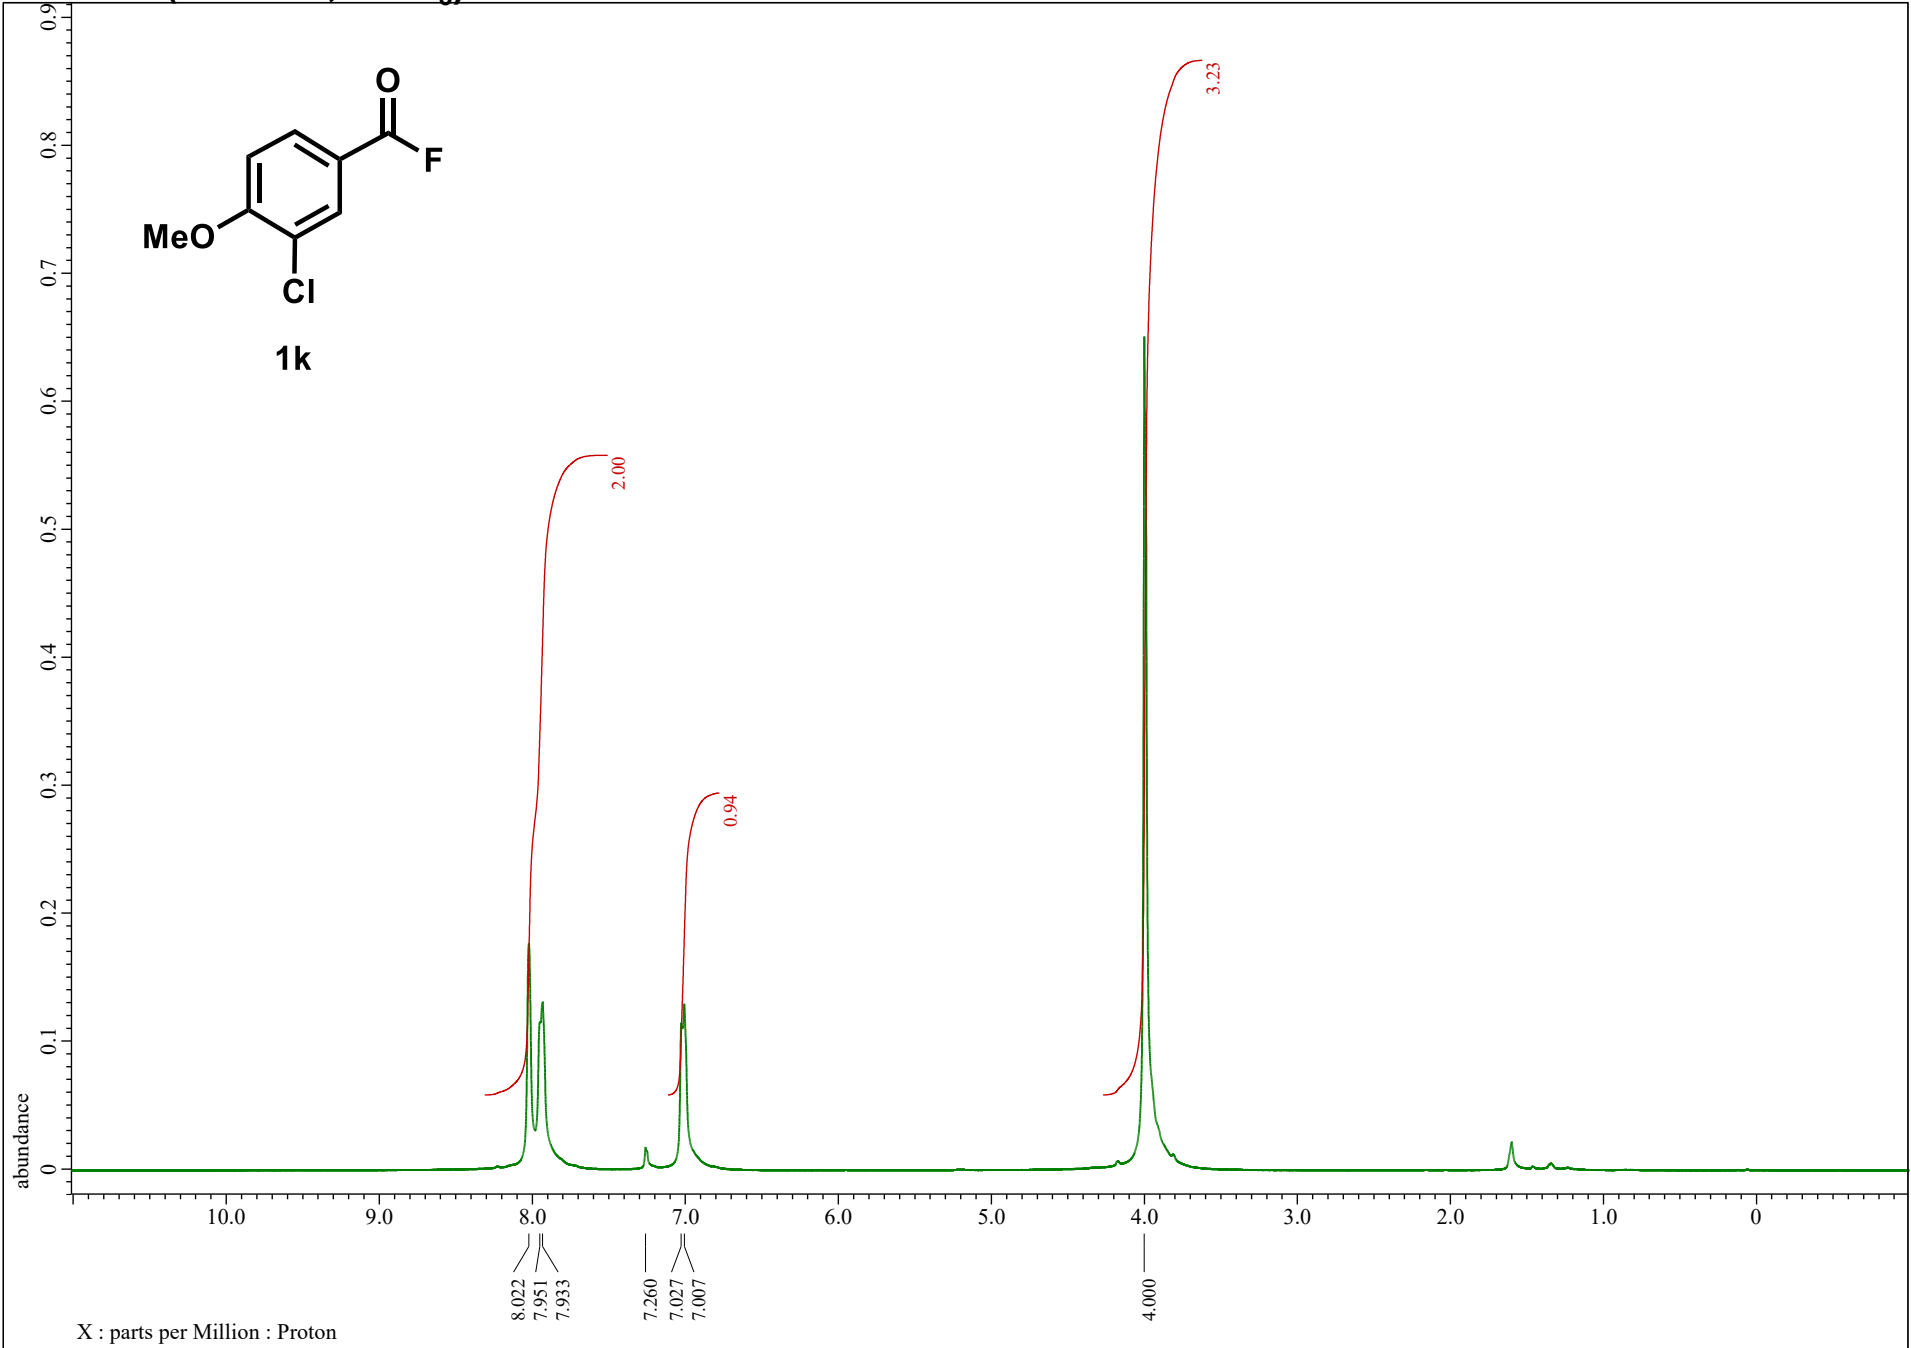

**<sup>13</sup>C NMR (101 MHz, CDCl<sub>3</sub>)**

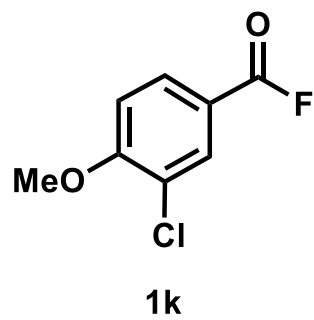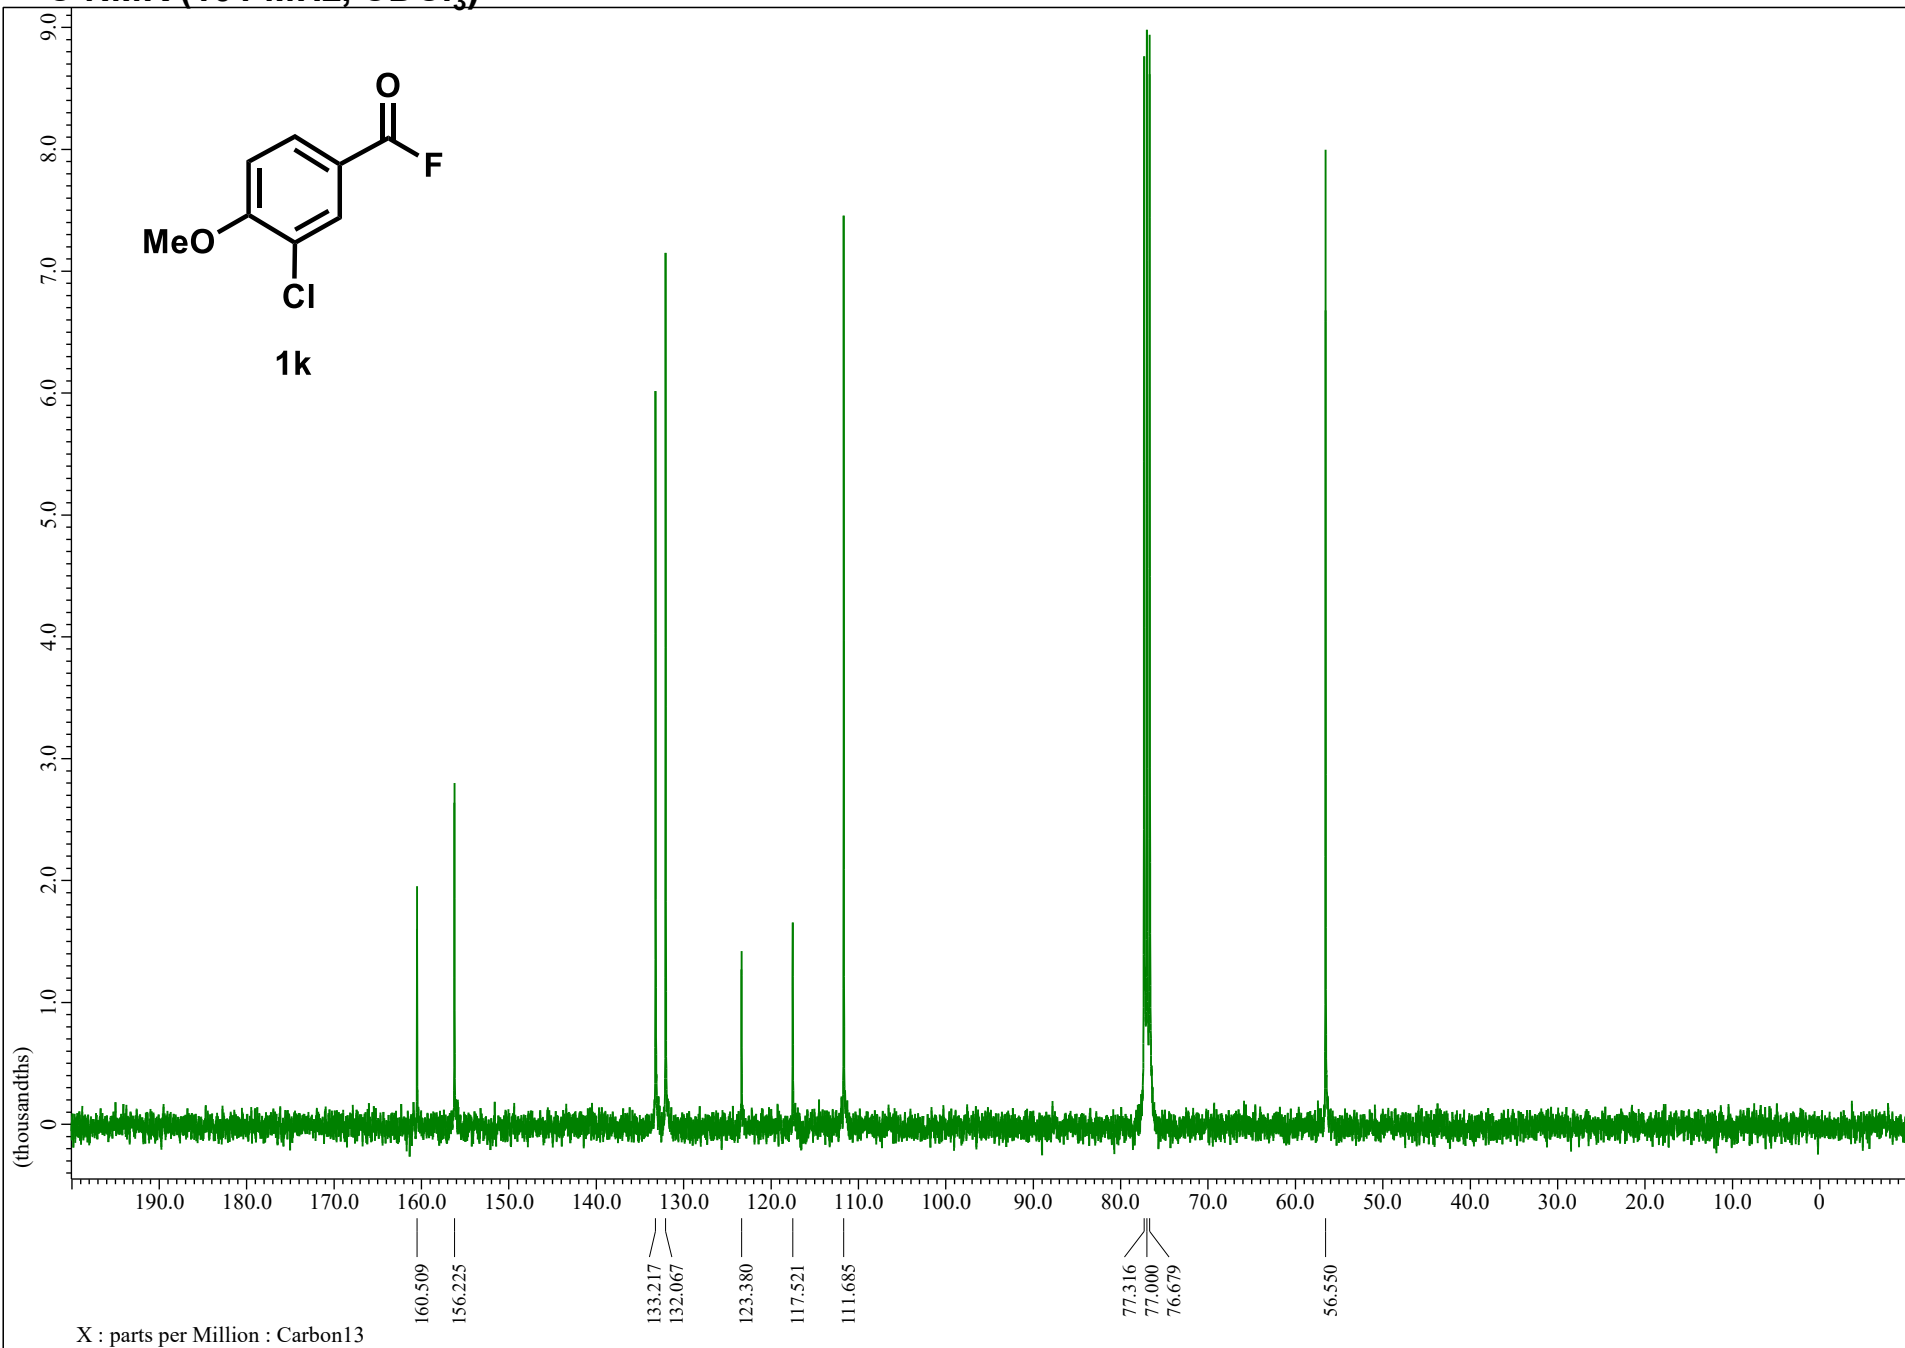

X : parts per Million : Carbon13

**<sup>19</sup>F NMR (376 MHz, CDCl<sub>3</sub>)**

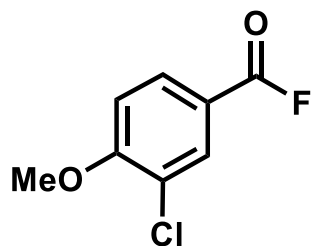

**1k**

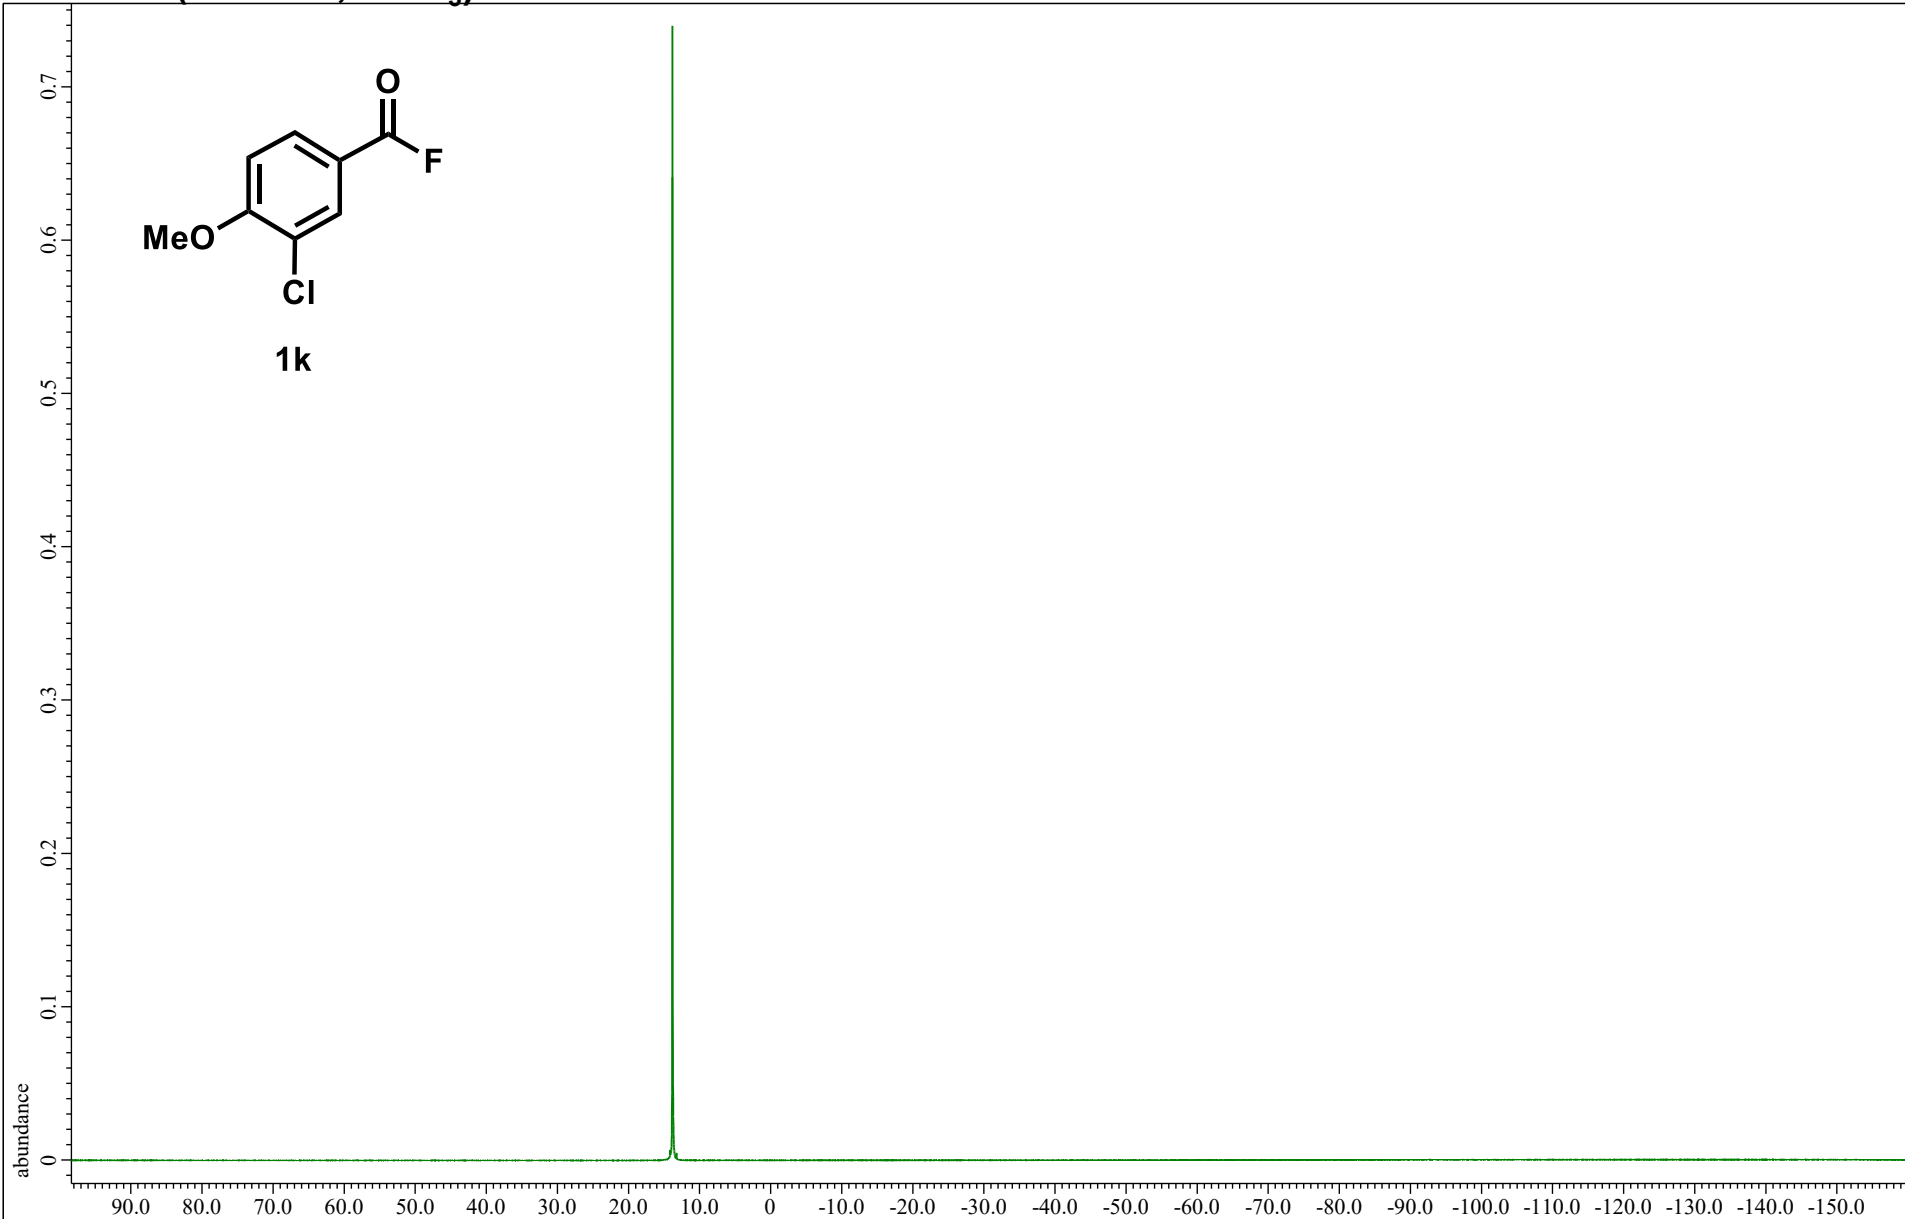

13.820

X : parts per Million : Fluorine19

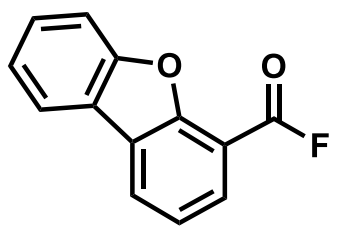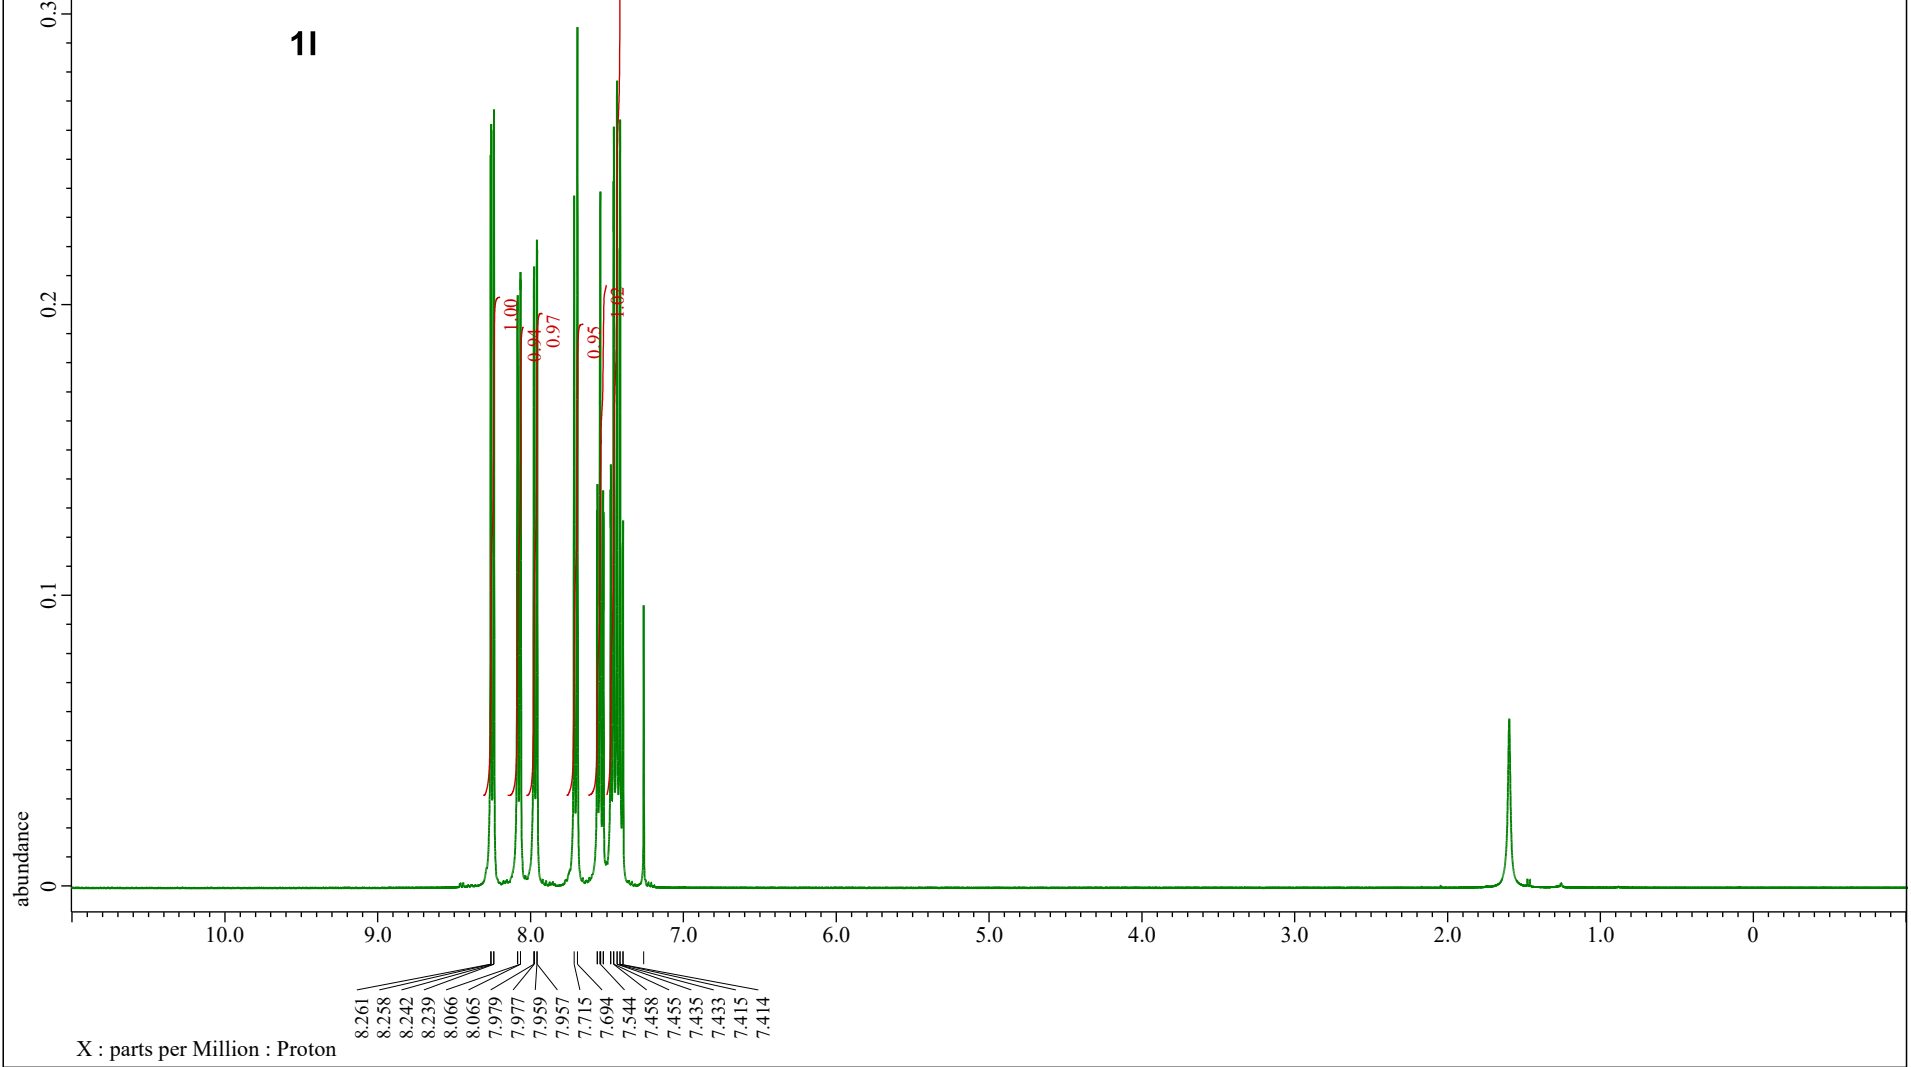

<sup>13</sup>C NMR (101 MHz, CDCl<sub>3</sub>)



11

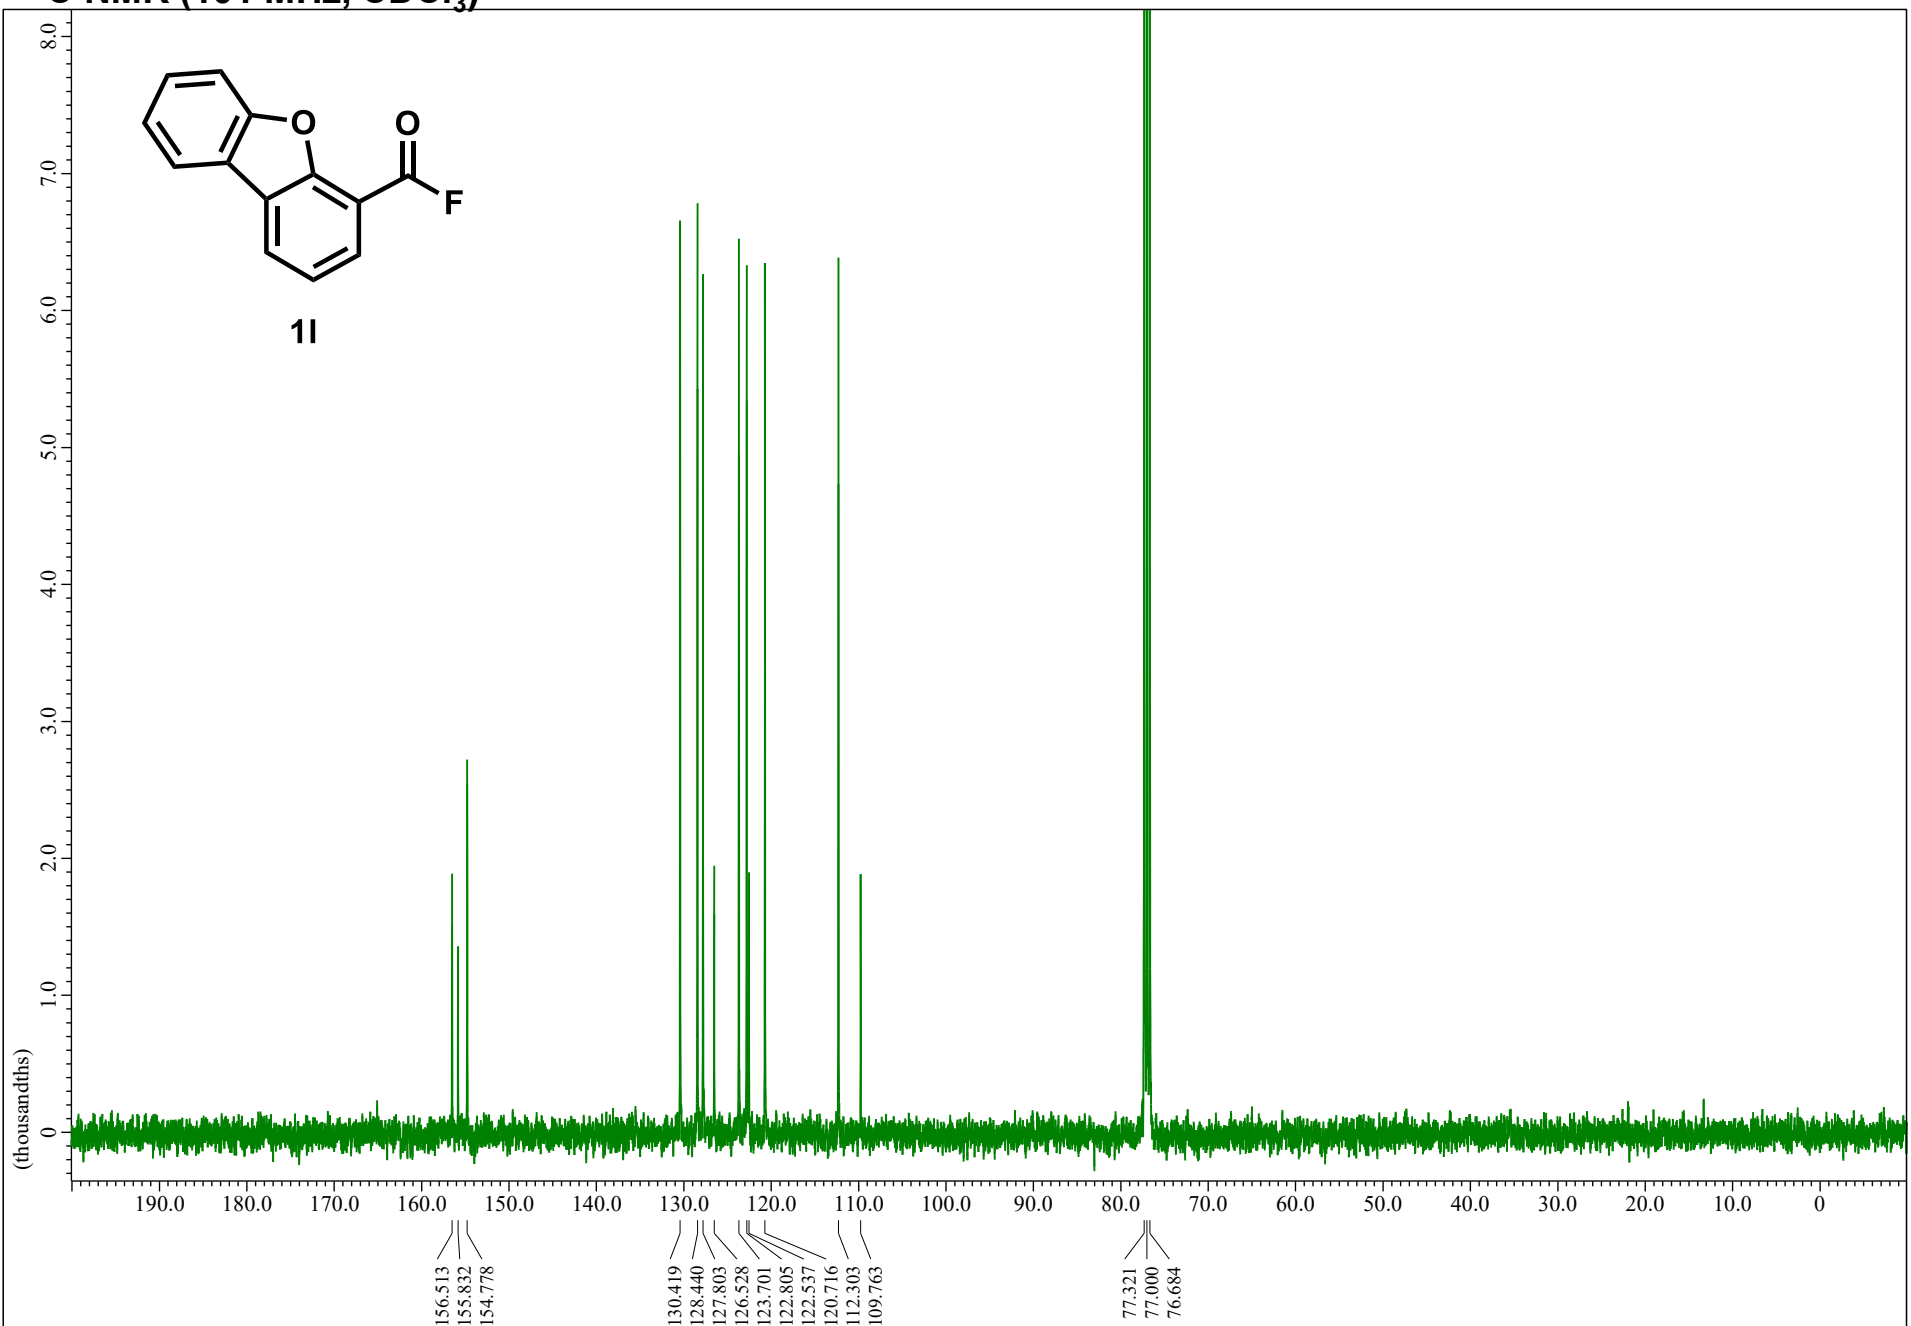

X : parts per Million : Carbon13

**<sup>19</sup>F NMR (376 MHz, CDCl<sub>3</sub>)**

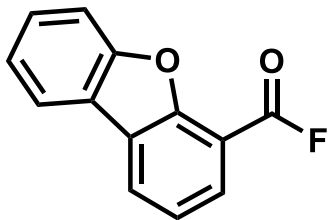

**11**

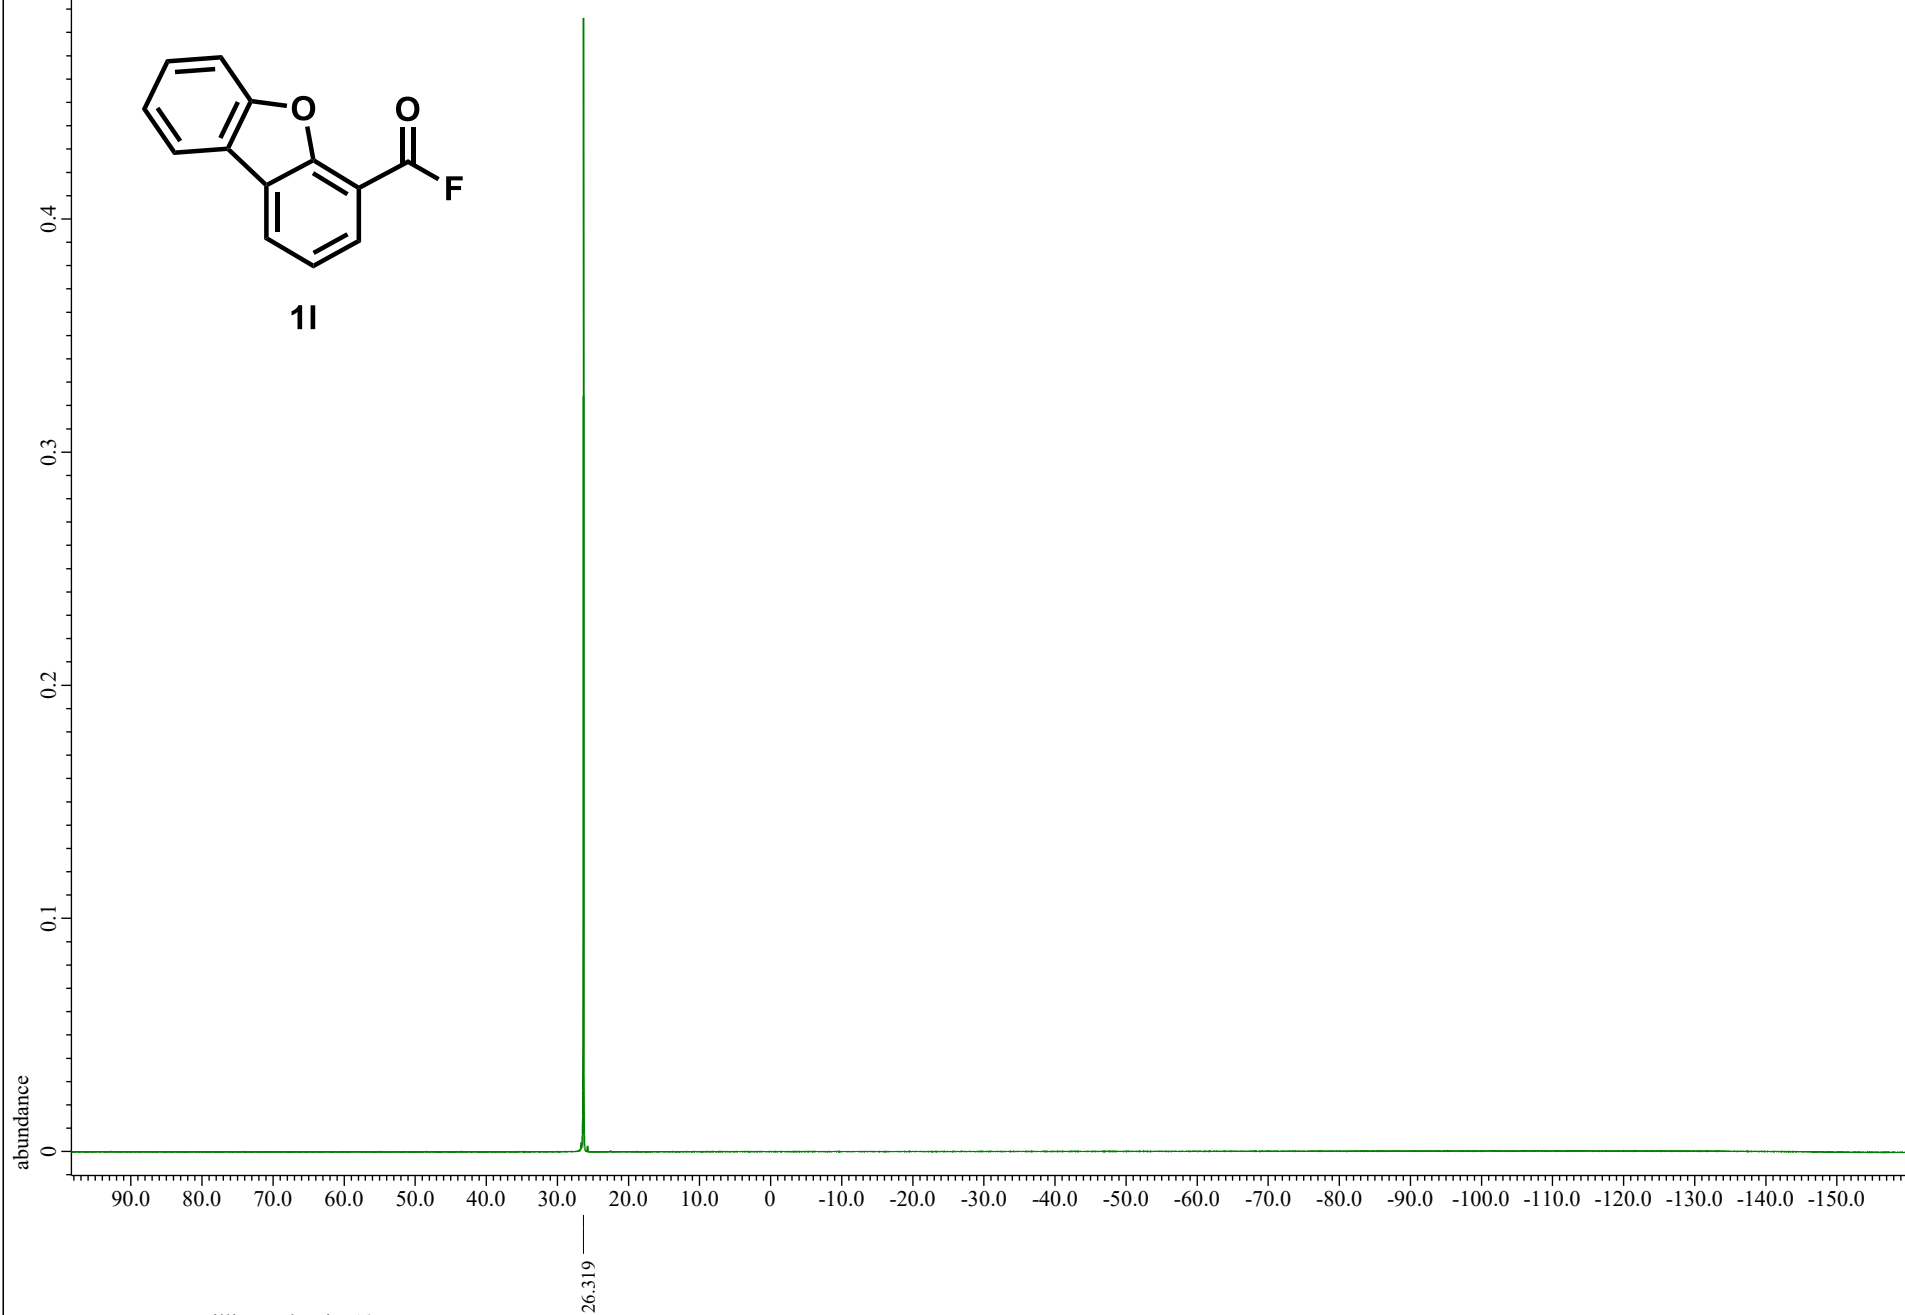

X : parts per Million : Fluorine19

<sup>1</sup>H NMR (400 MHz, CDCl<sub>3</sub>)

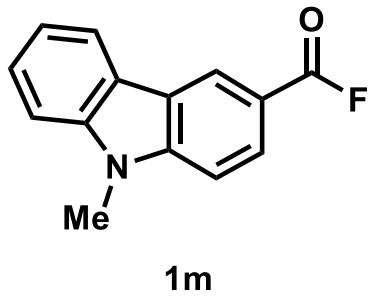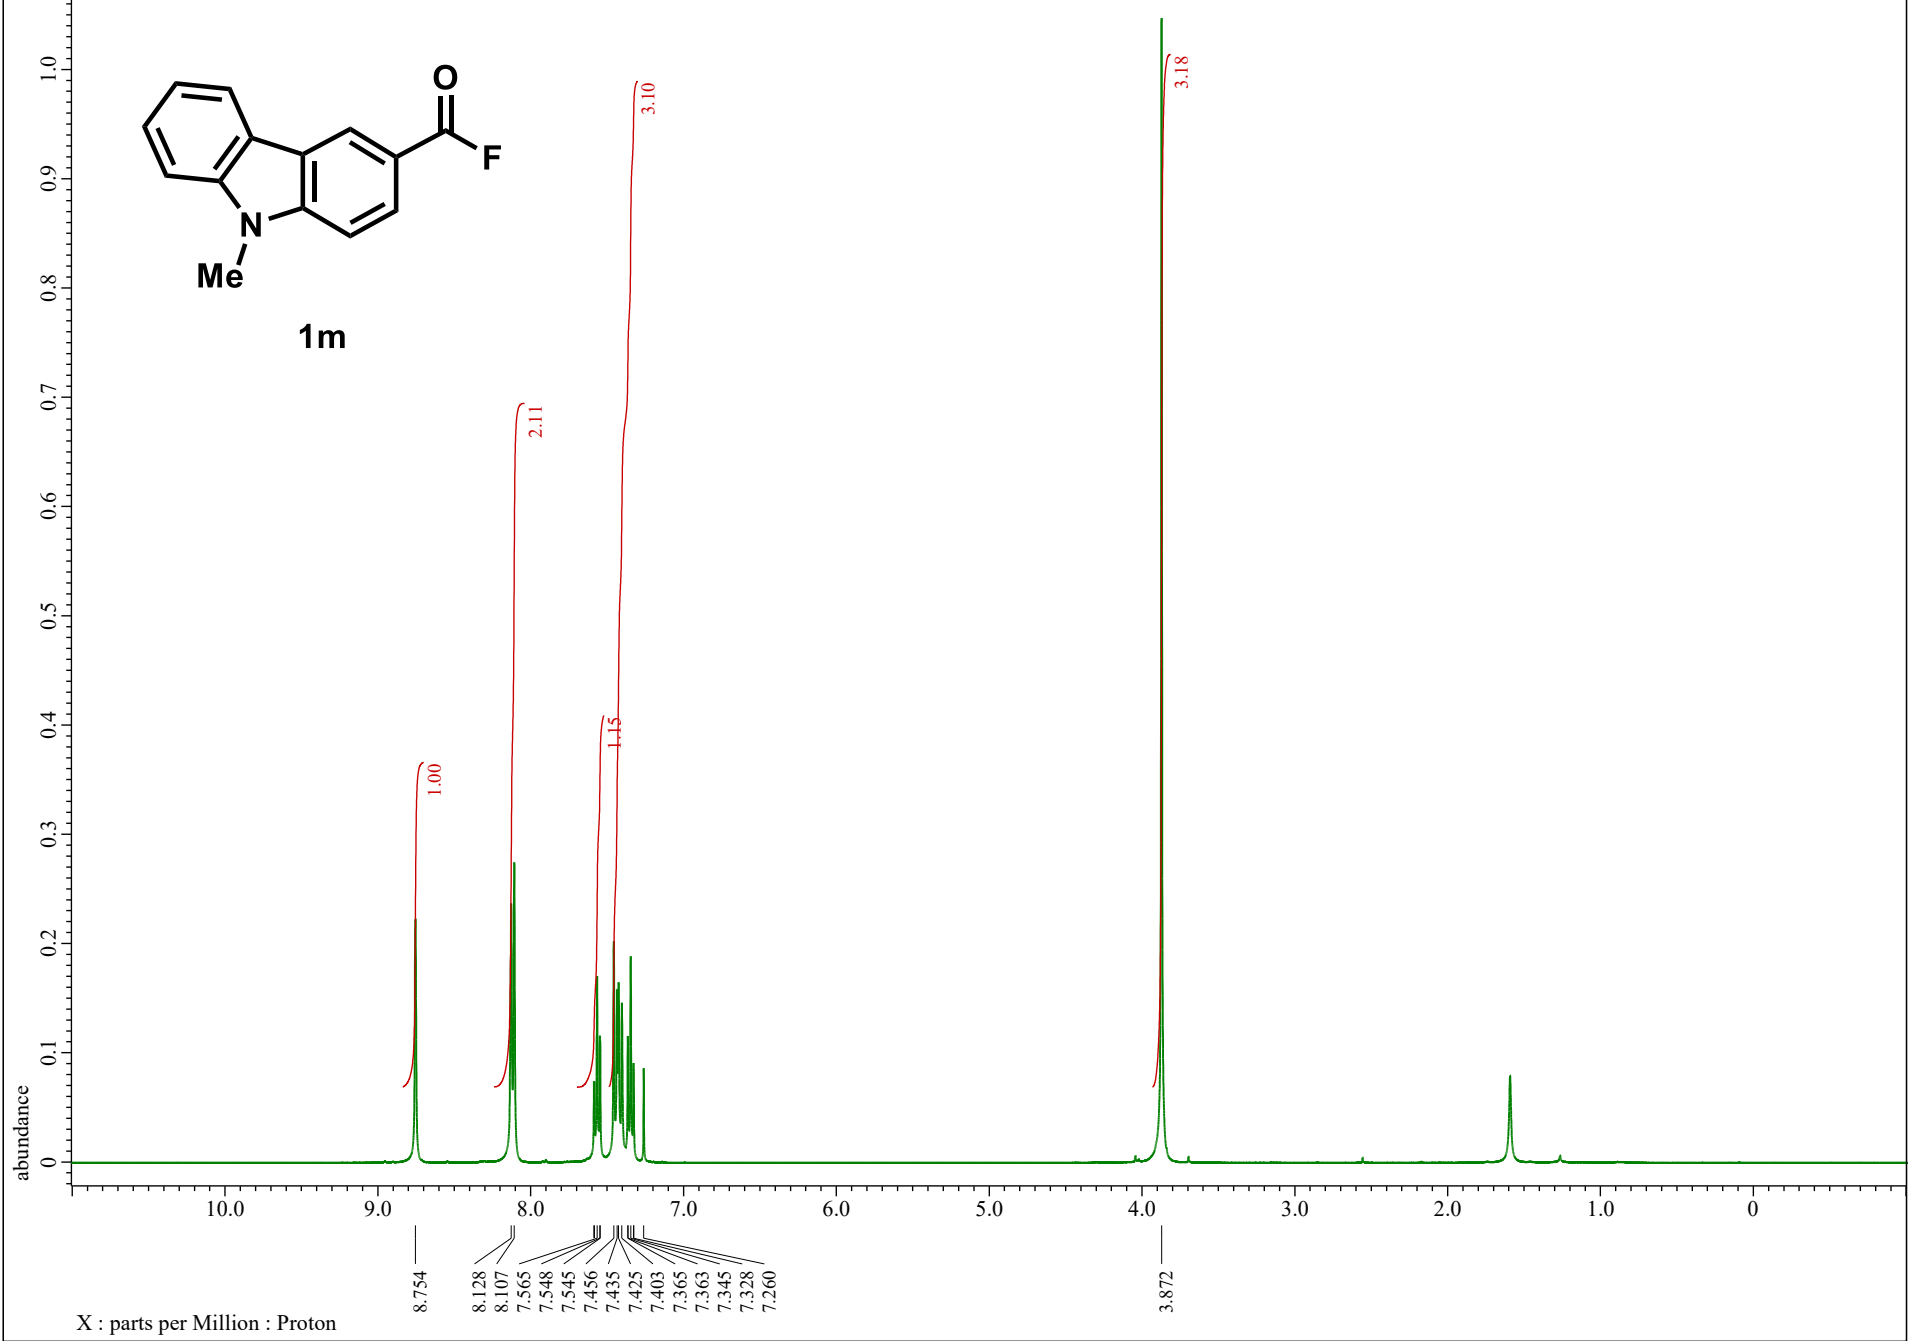

<sup>13</sup>C NMR (101 MHz, CDCl<sub>3</sub>)

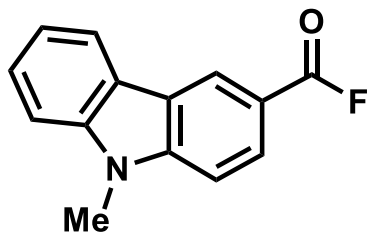

1m

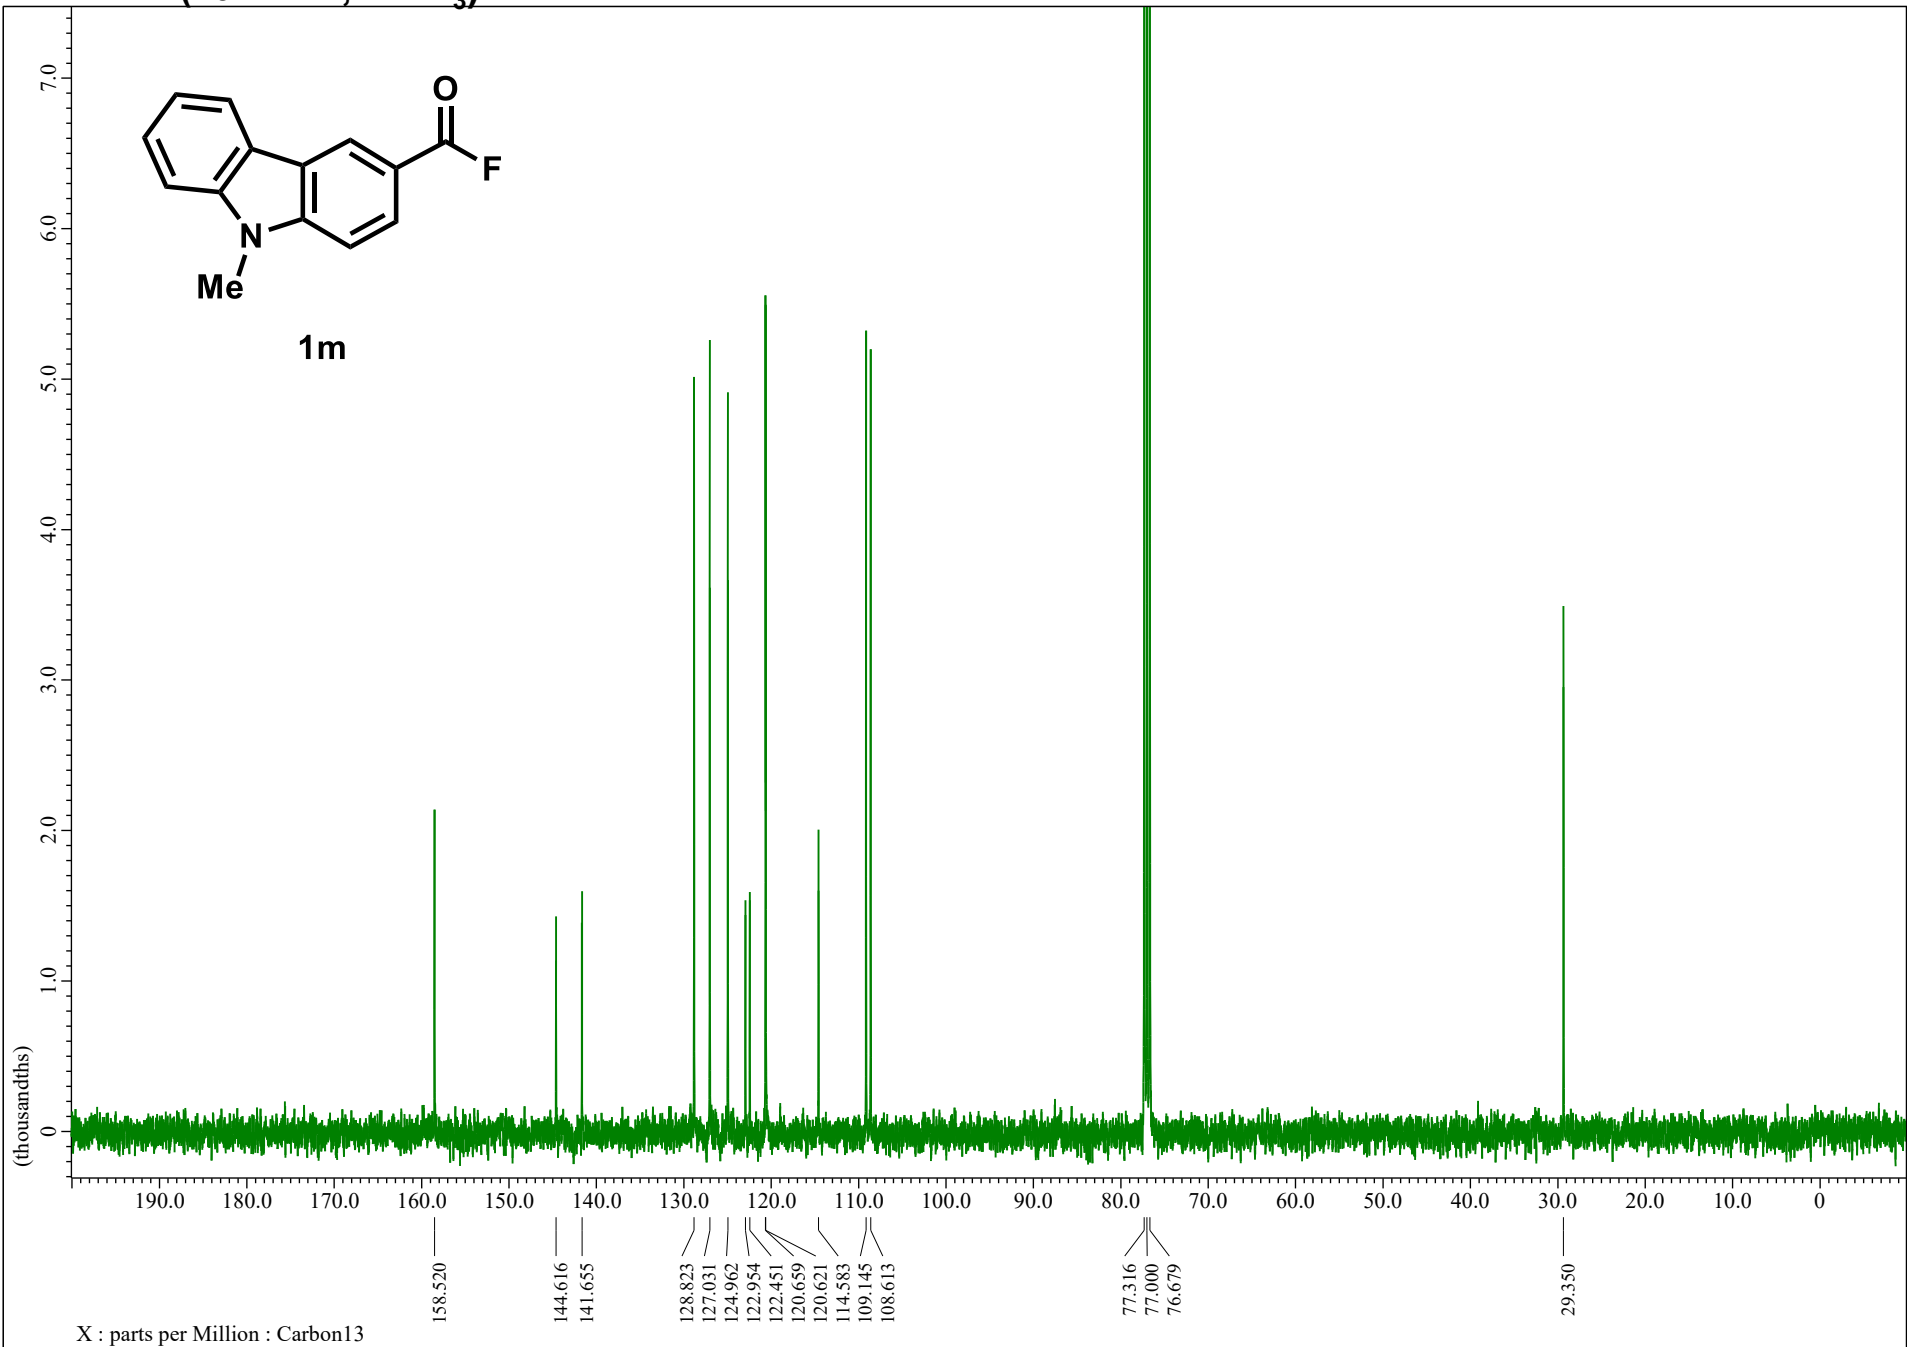

X : parts per Million : Carbon13

**<sup>19</sup>F NMR (376 MHz, CDCl<sub>3</sub>)**

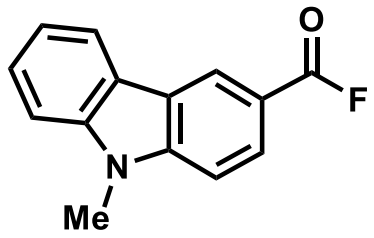

**1m**

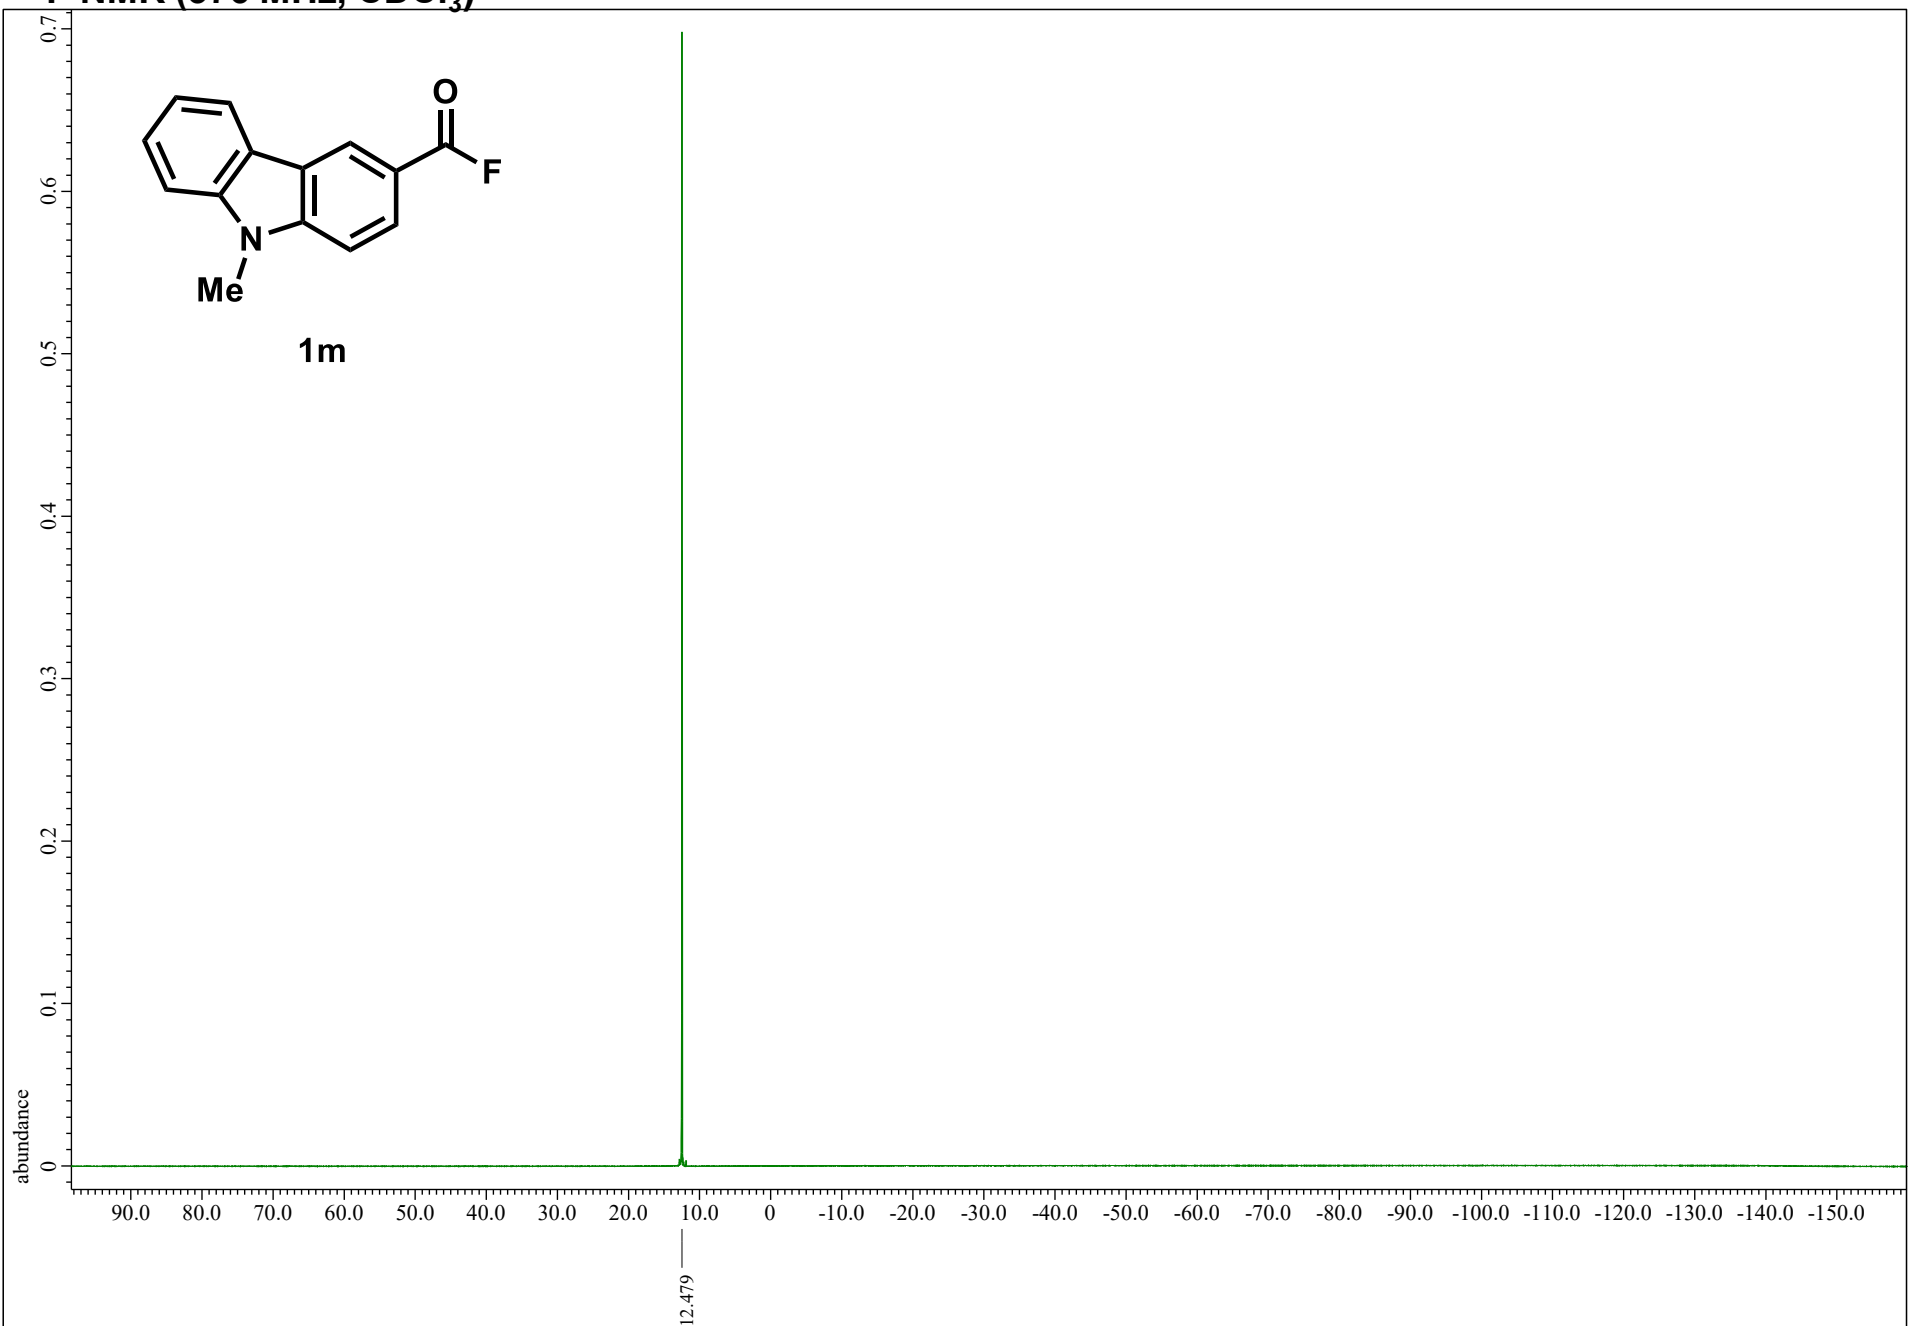

X : parts per Million : Fluorine19

<sup>1</sup>H NMR (400 MHz, CDCl<sub>3</sub>)

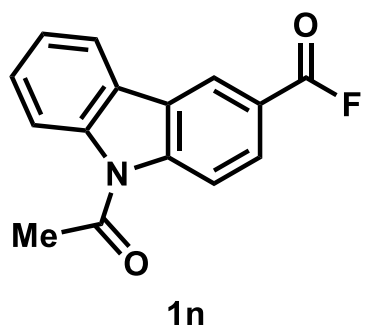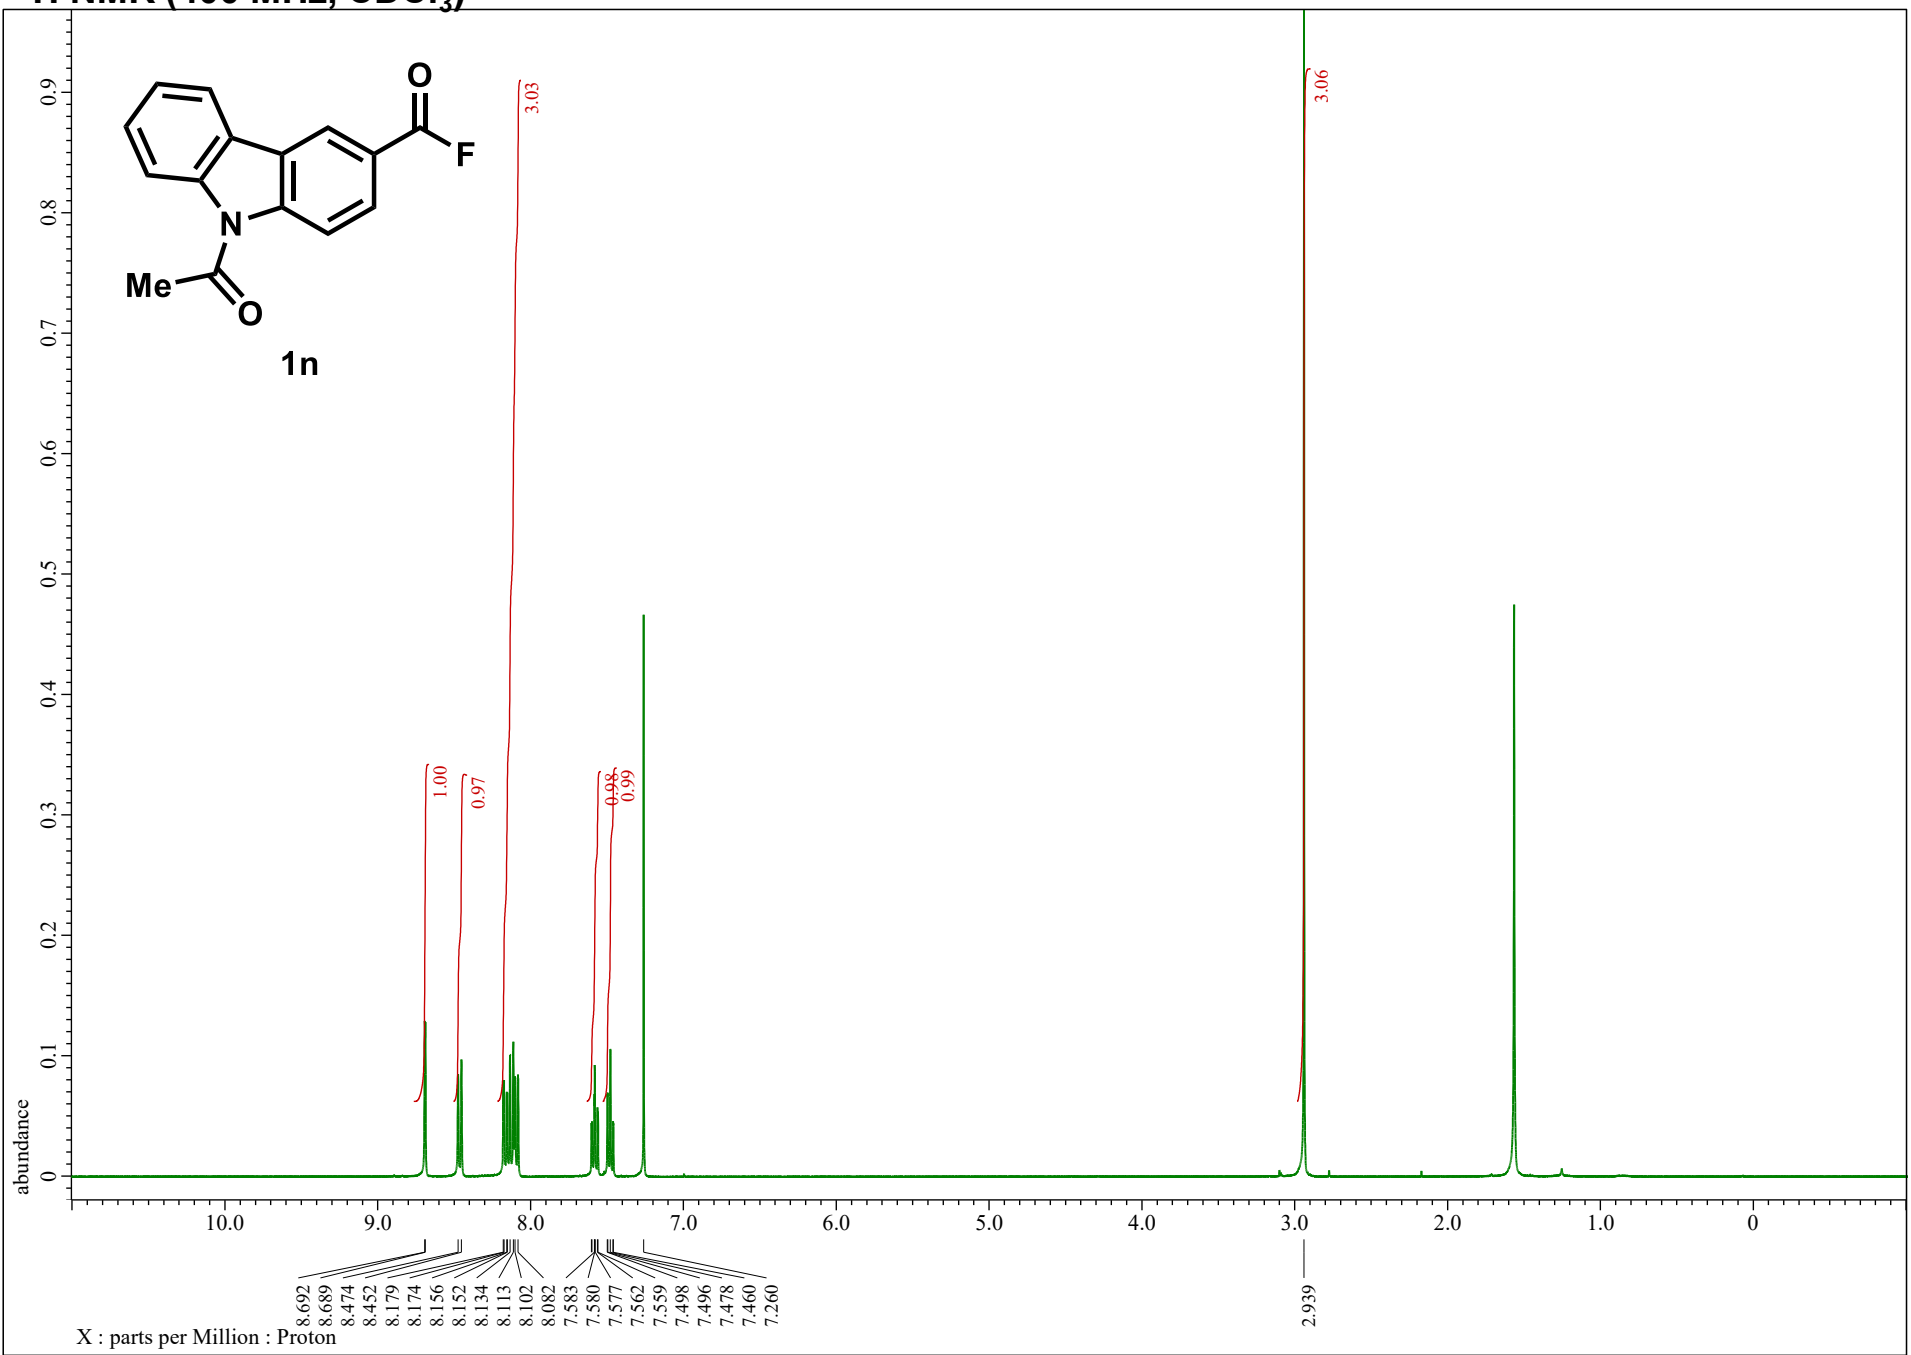

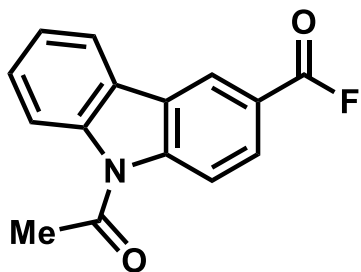

1n

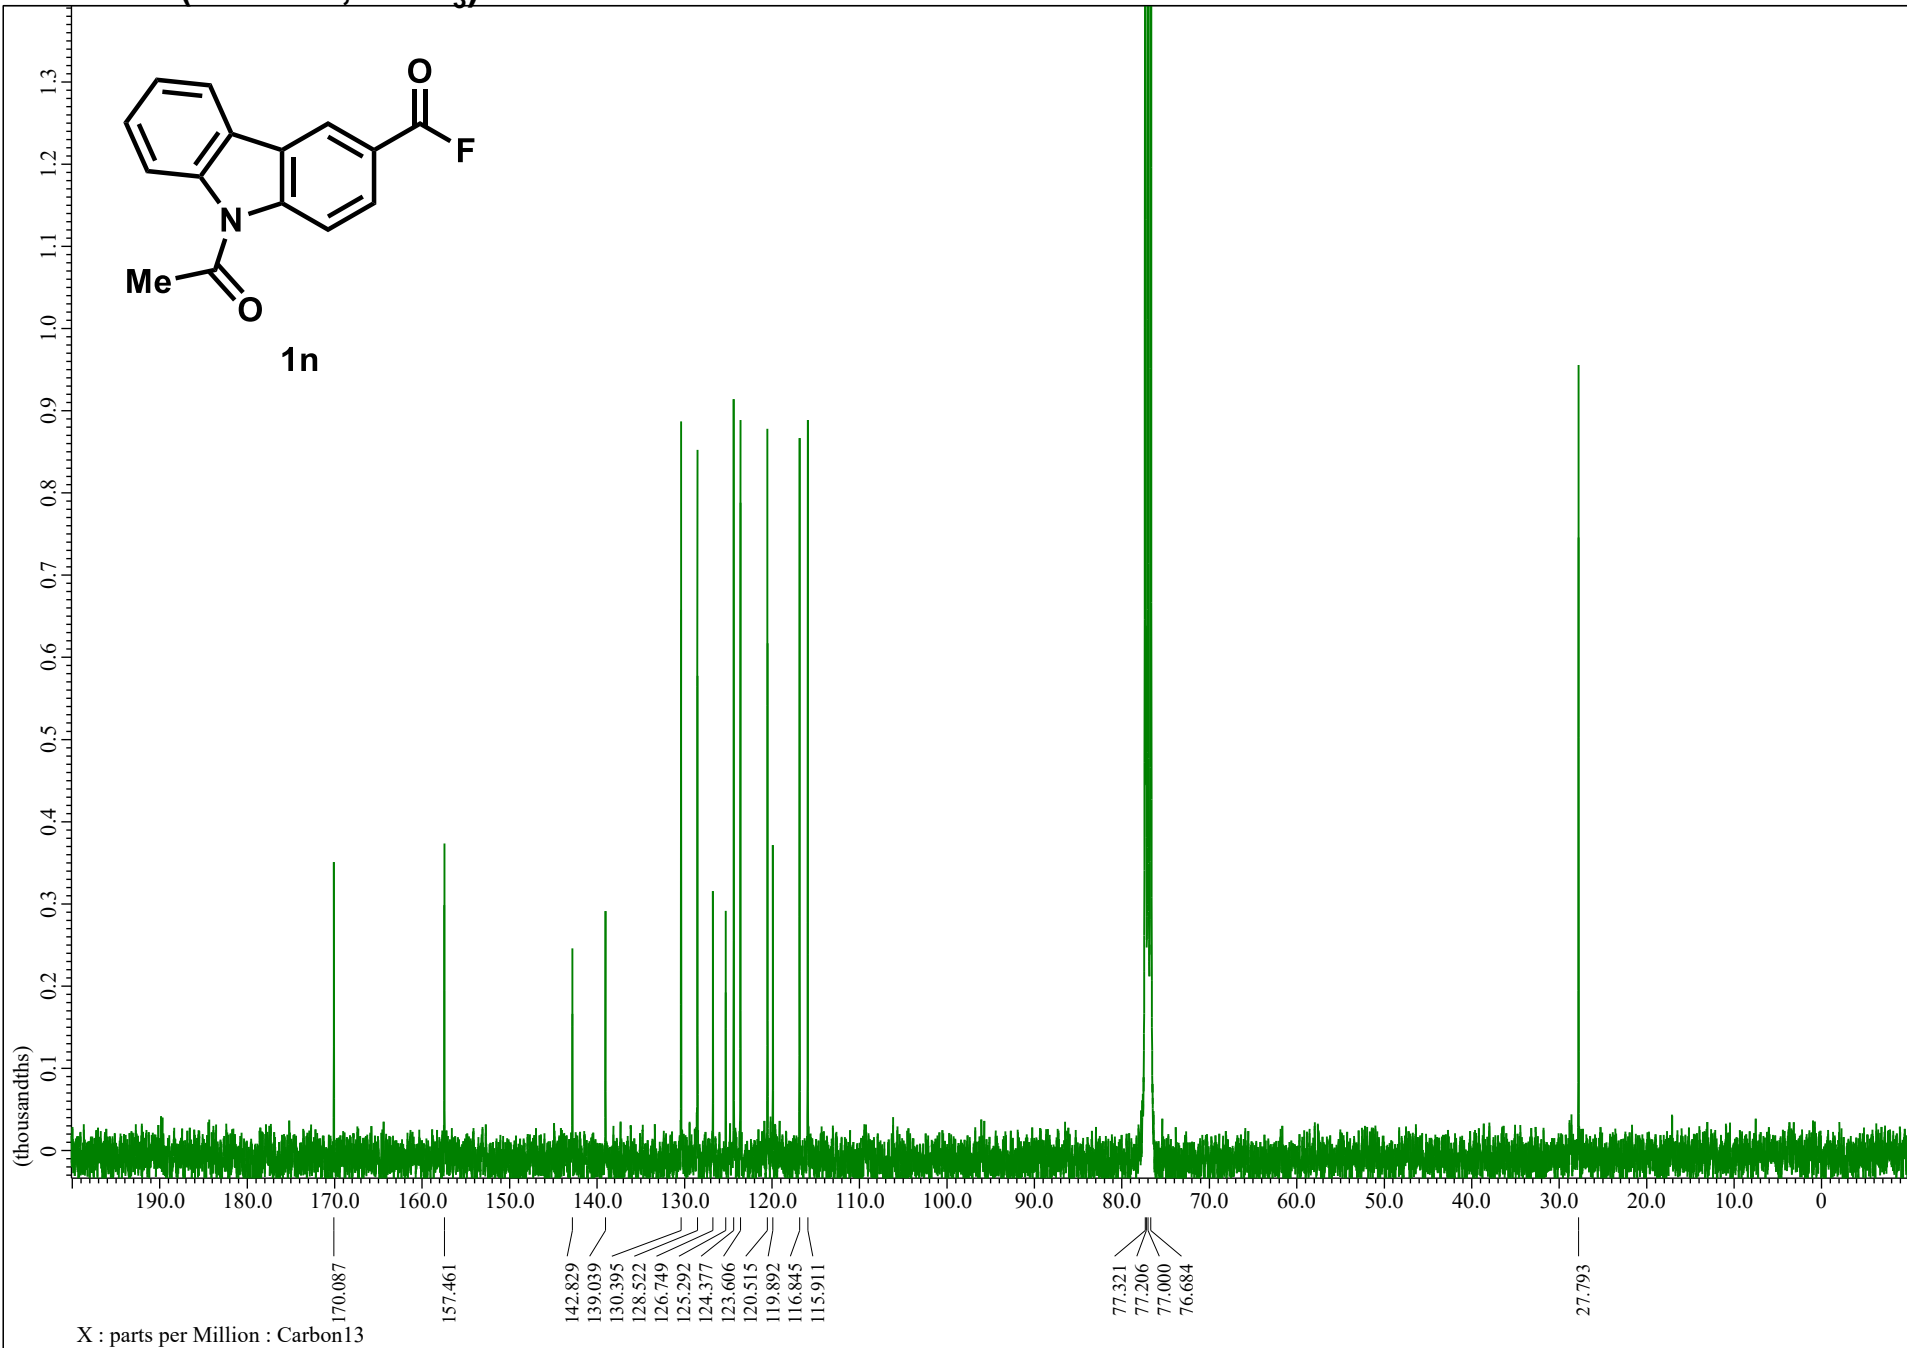

**<sup>19</sup>F NMR (376 MHz, CDCl<sub>3</sub>)**

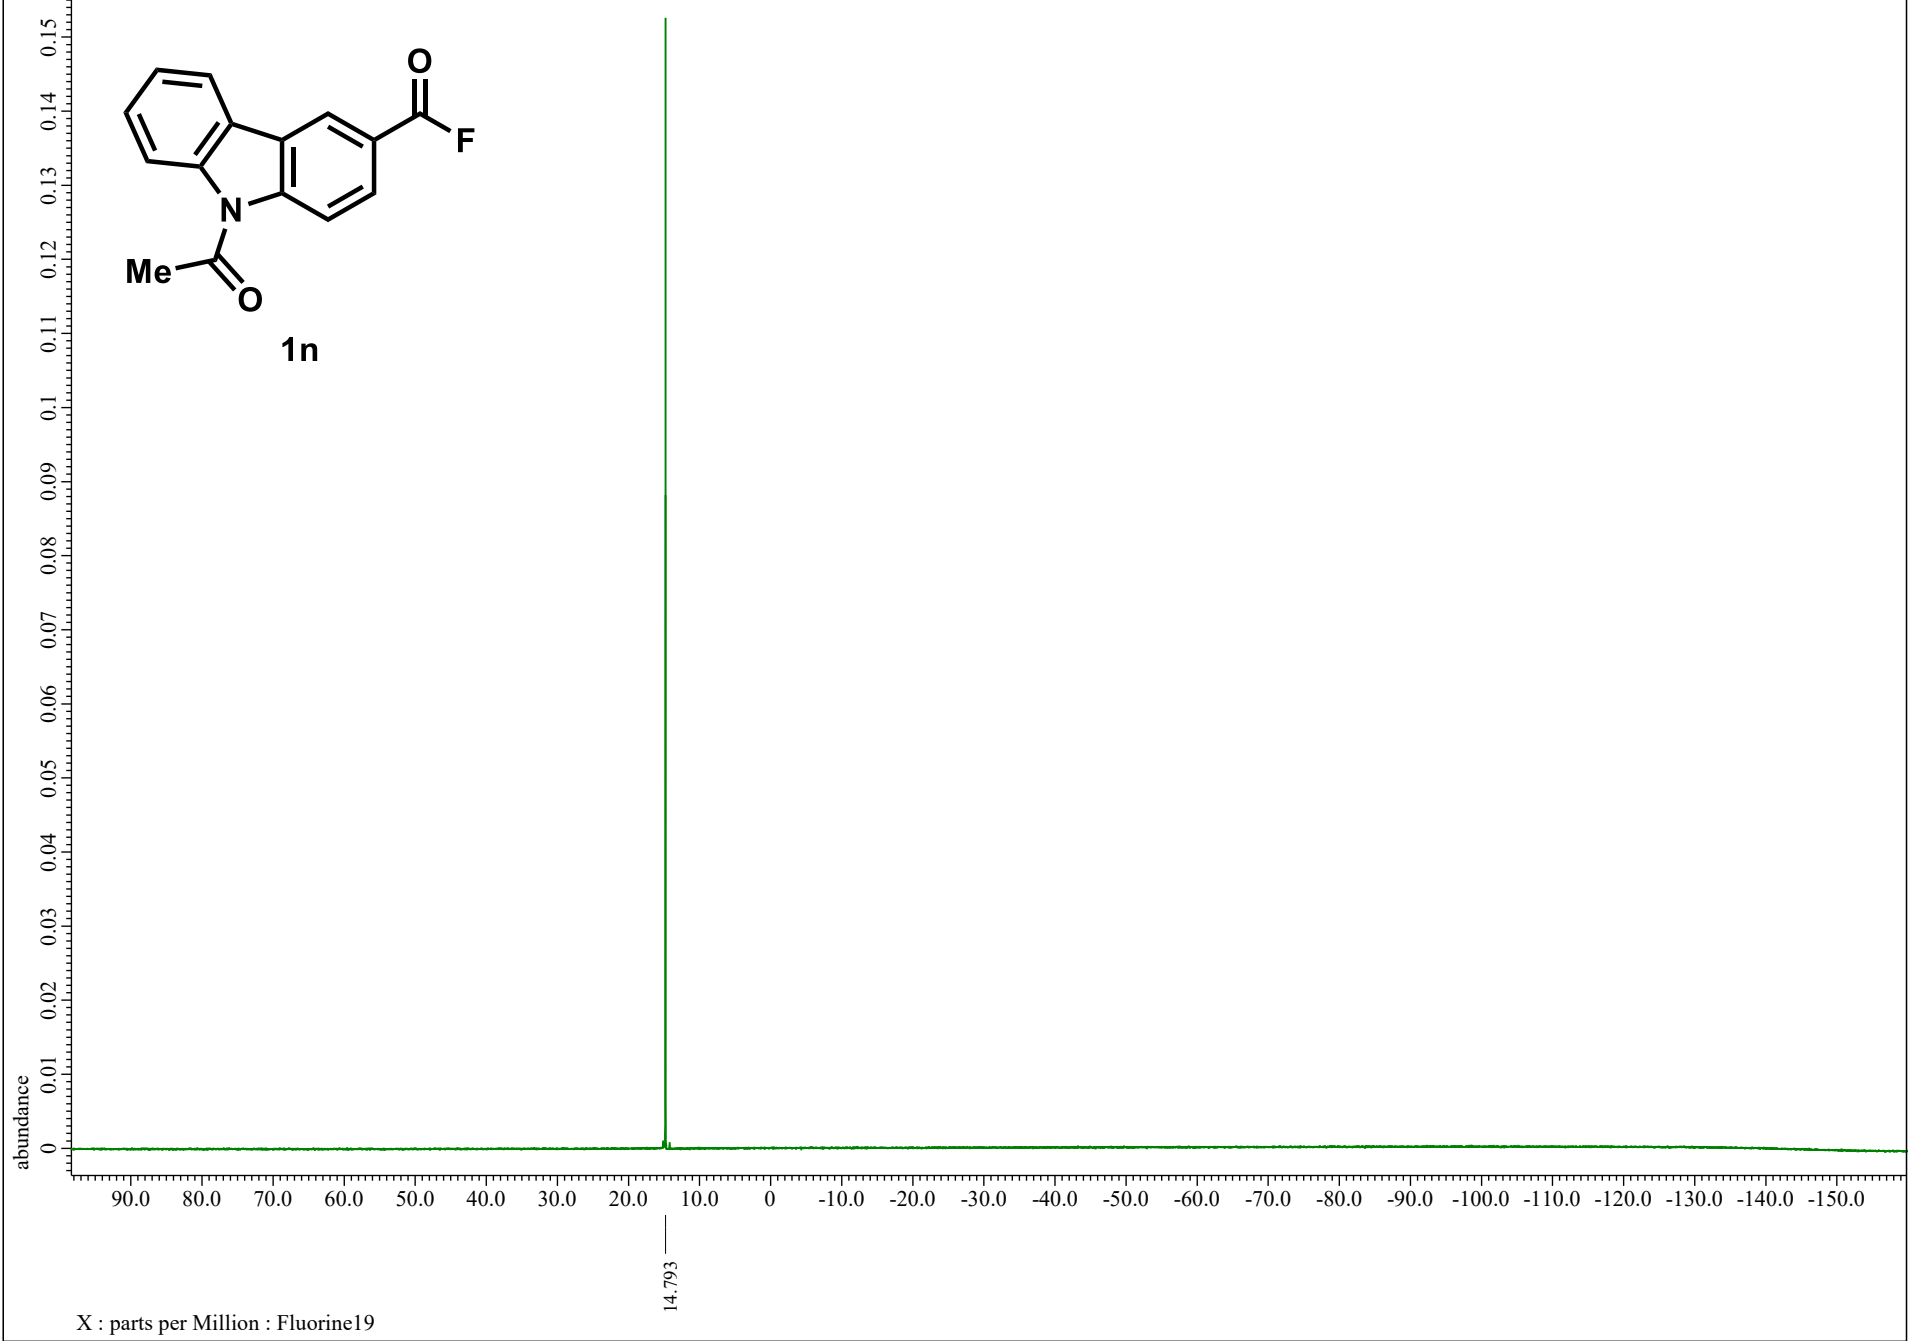

X : parts per Million : Fluorine19

<sup>1</sup>H NMR (400 MHz, CDCl<sub>3</sub>)

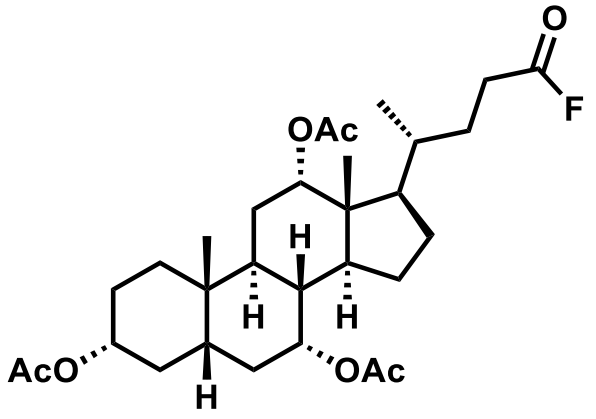

1s

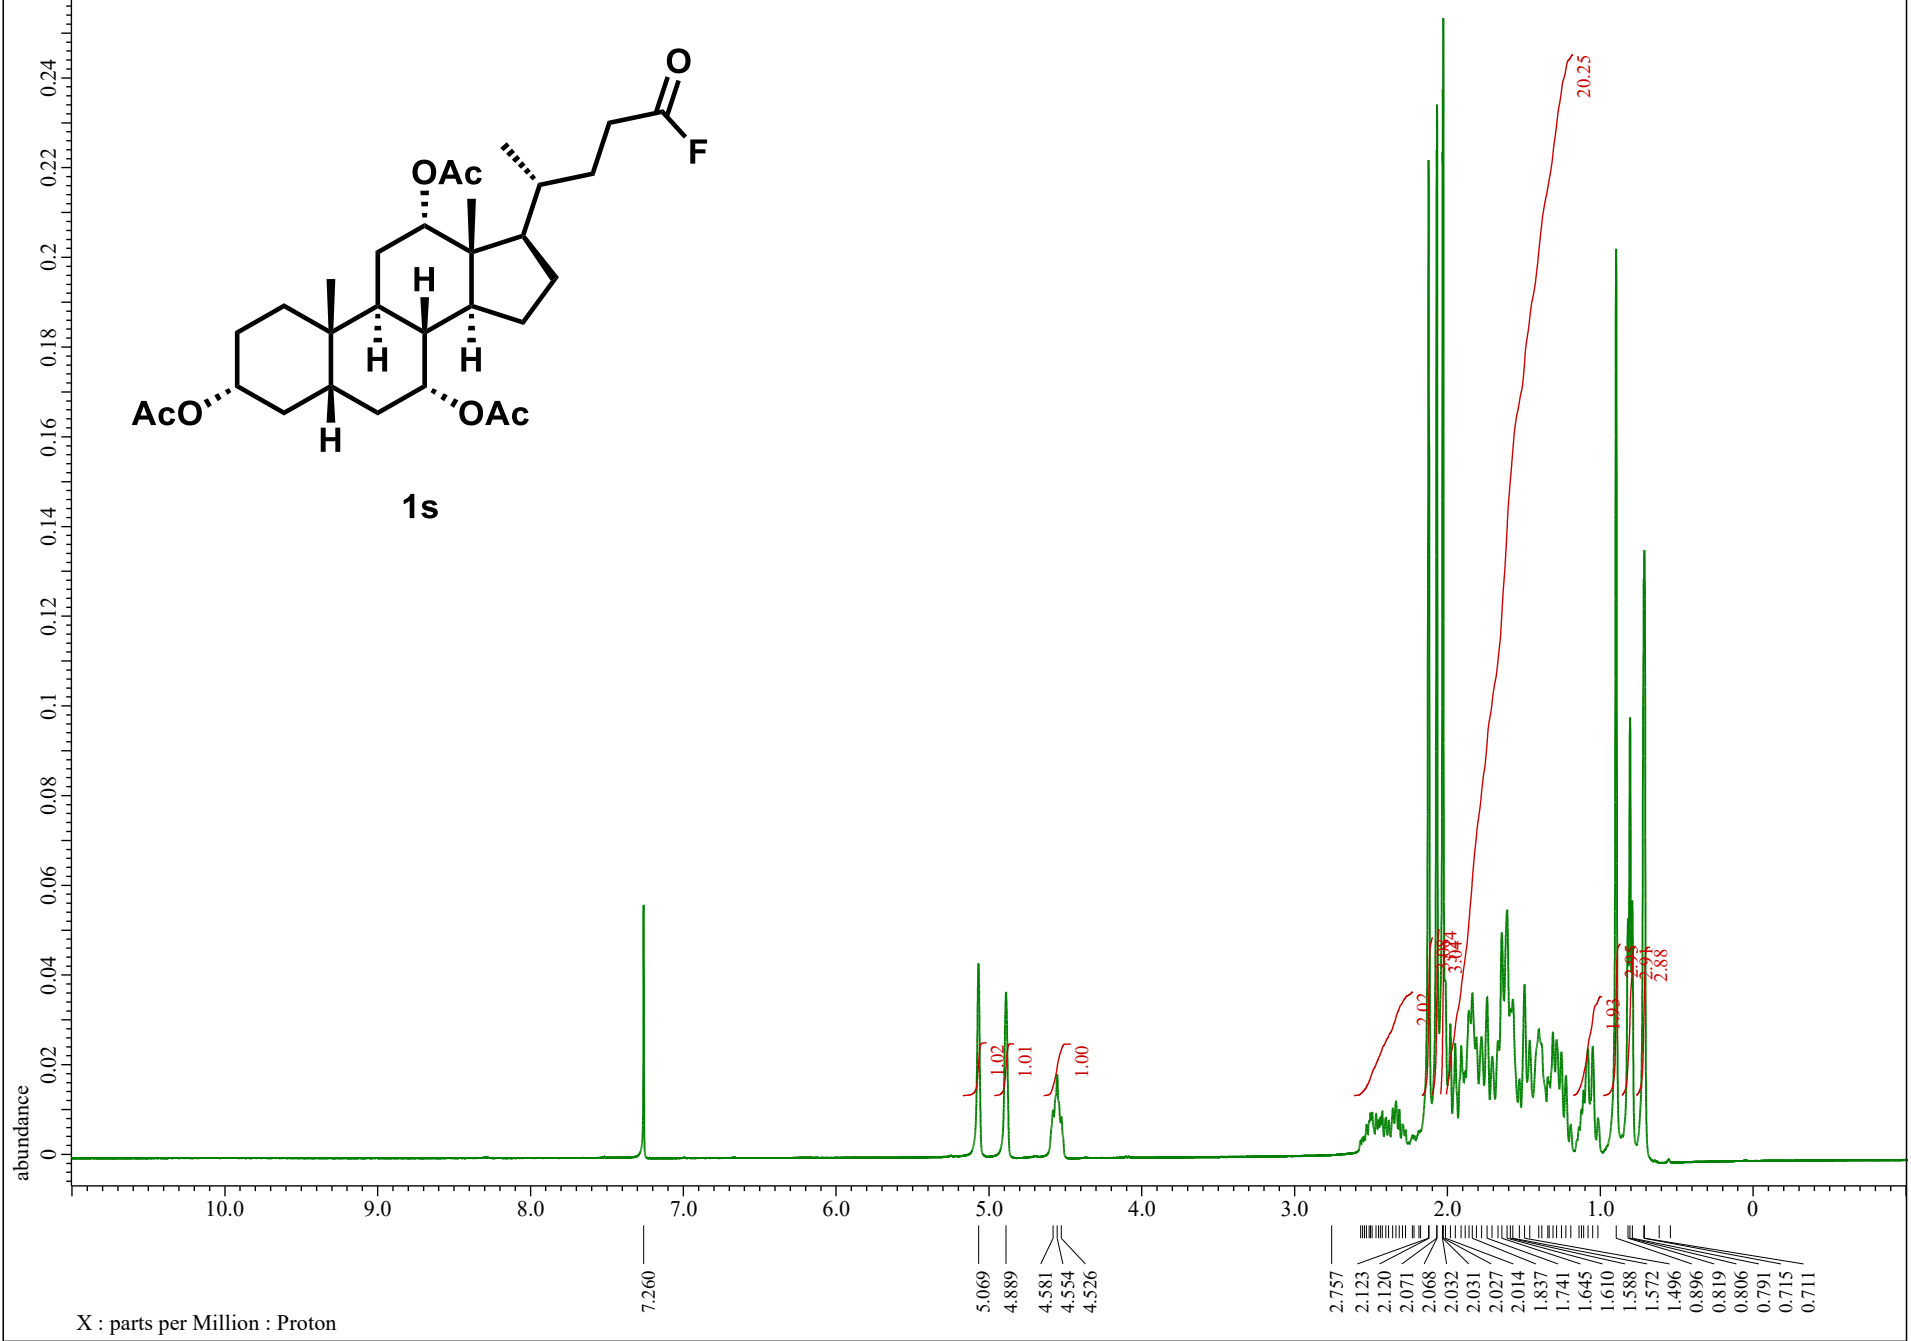

X : parts per Million : Proton

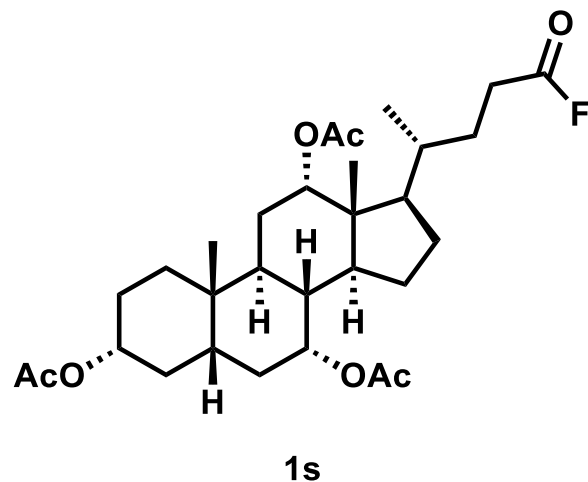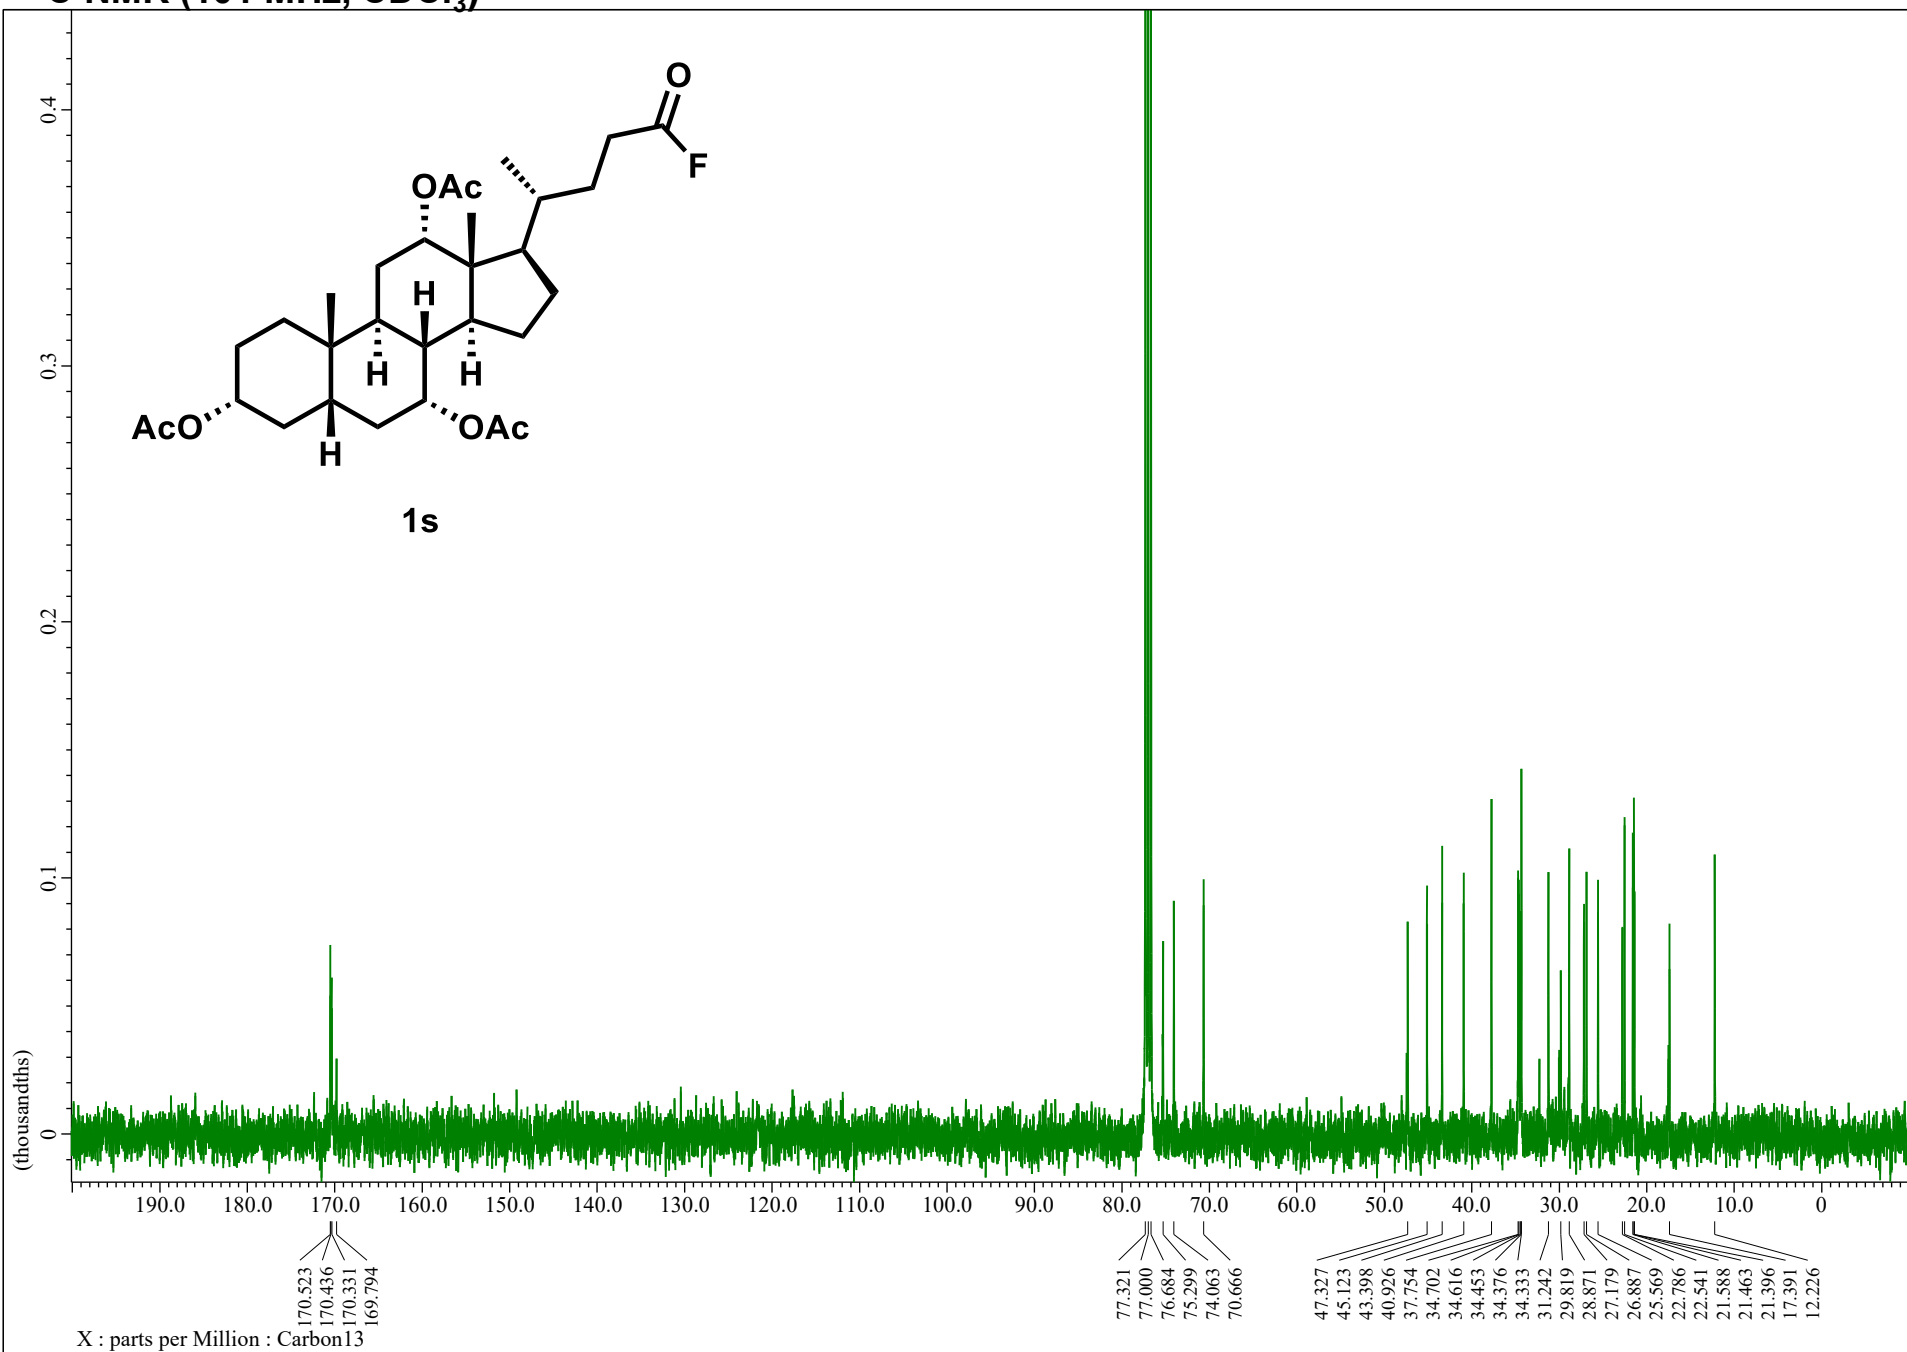

**<sup>19</sup>F NMR (376 MHz, CDCl<sub>3</sub>)**

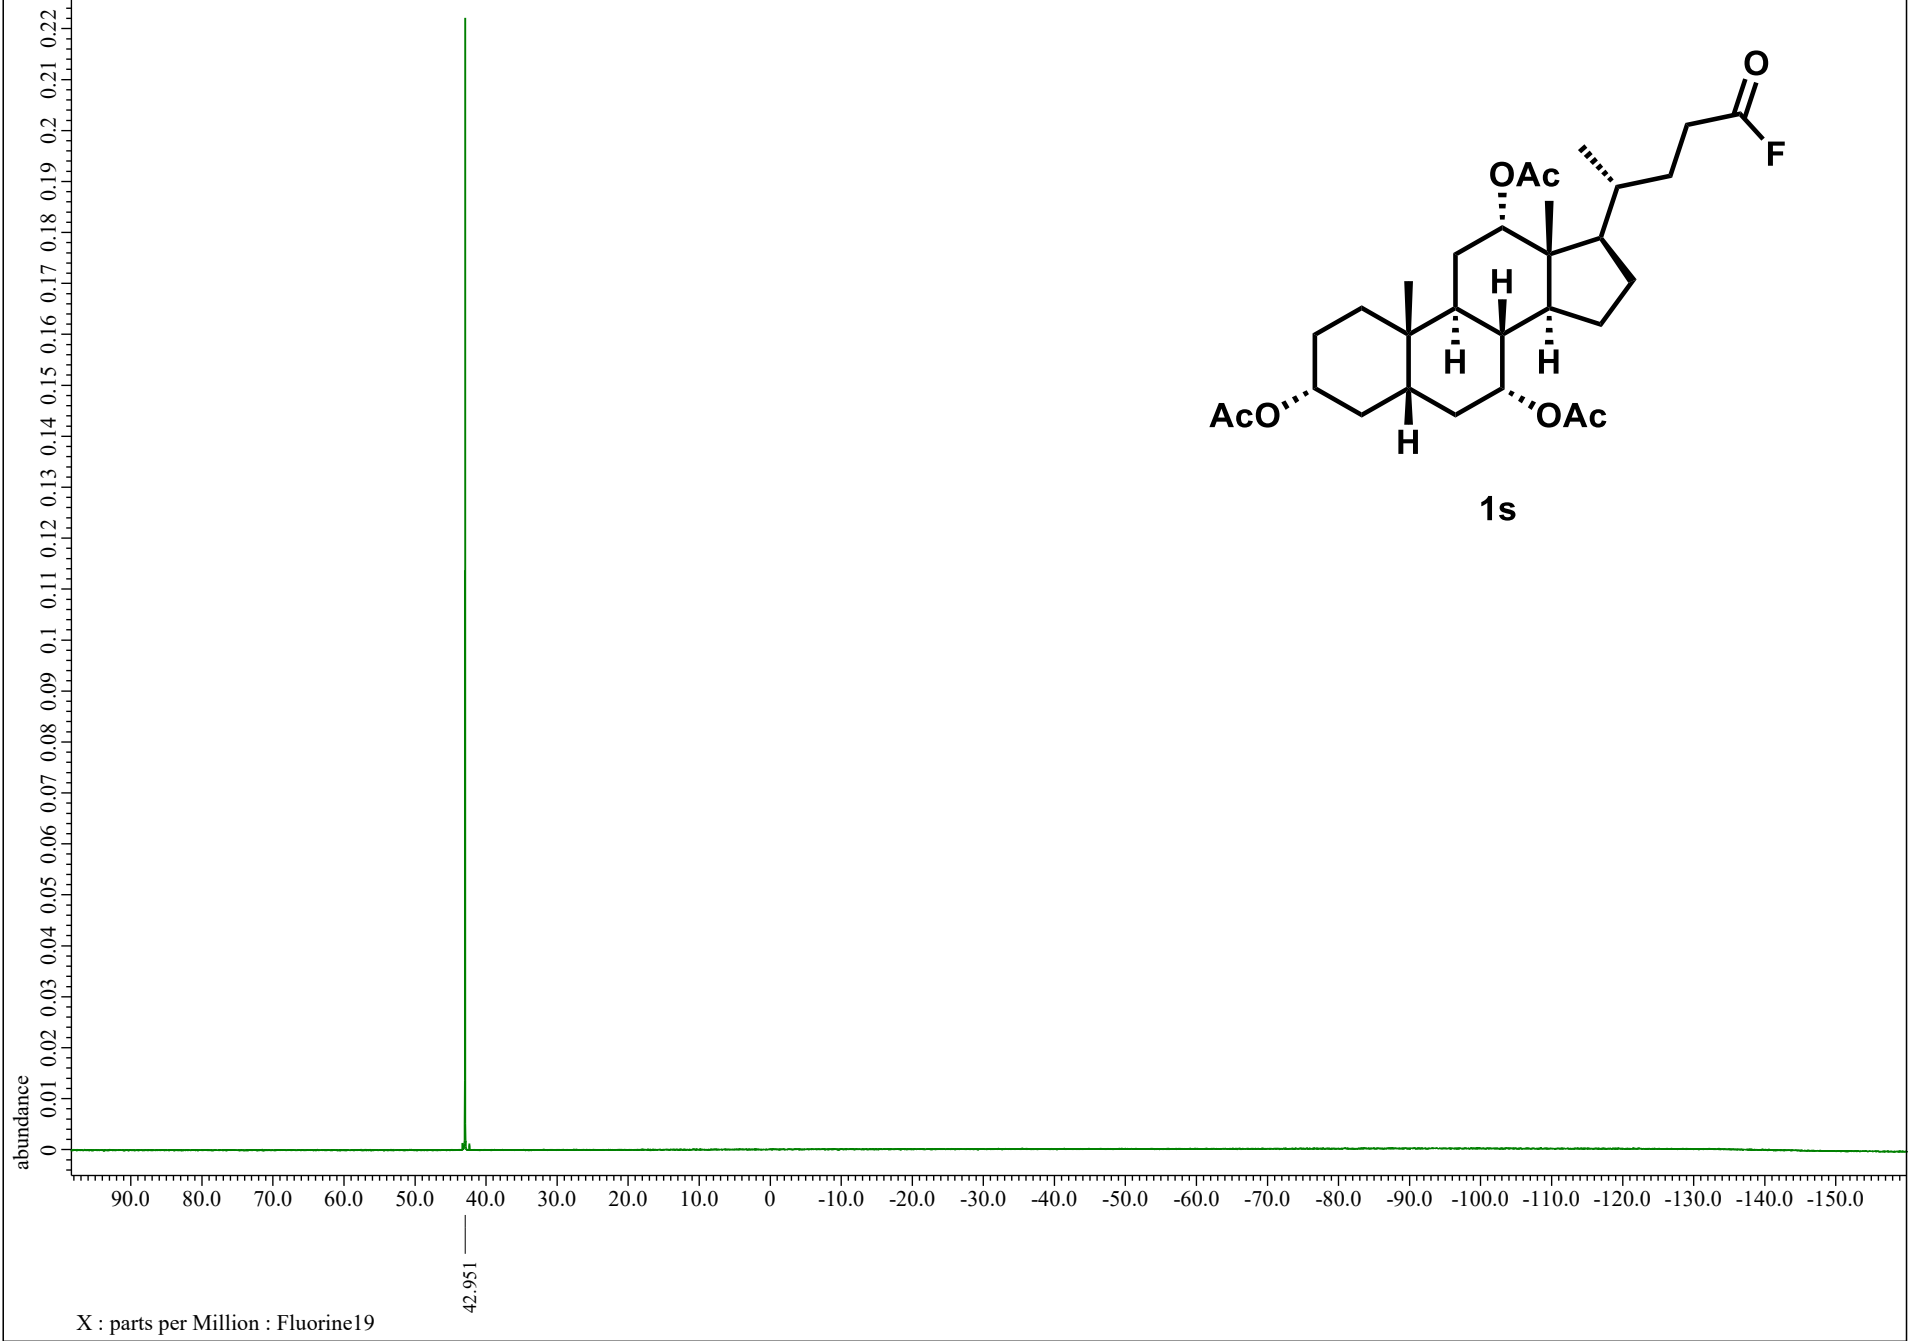

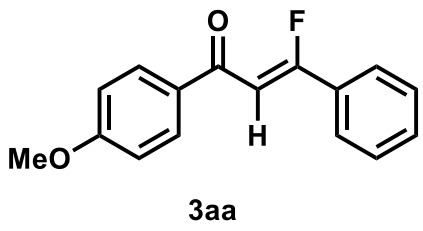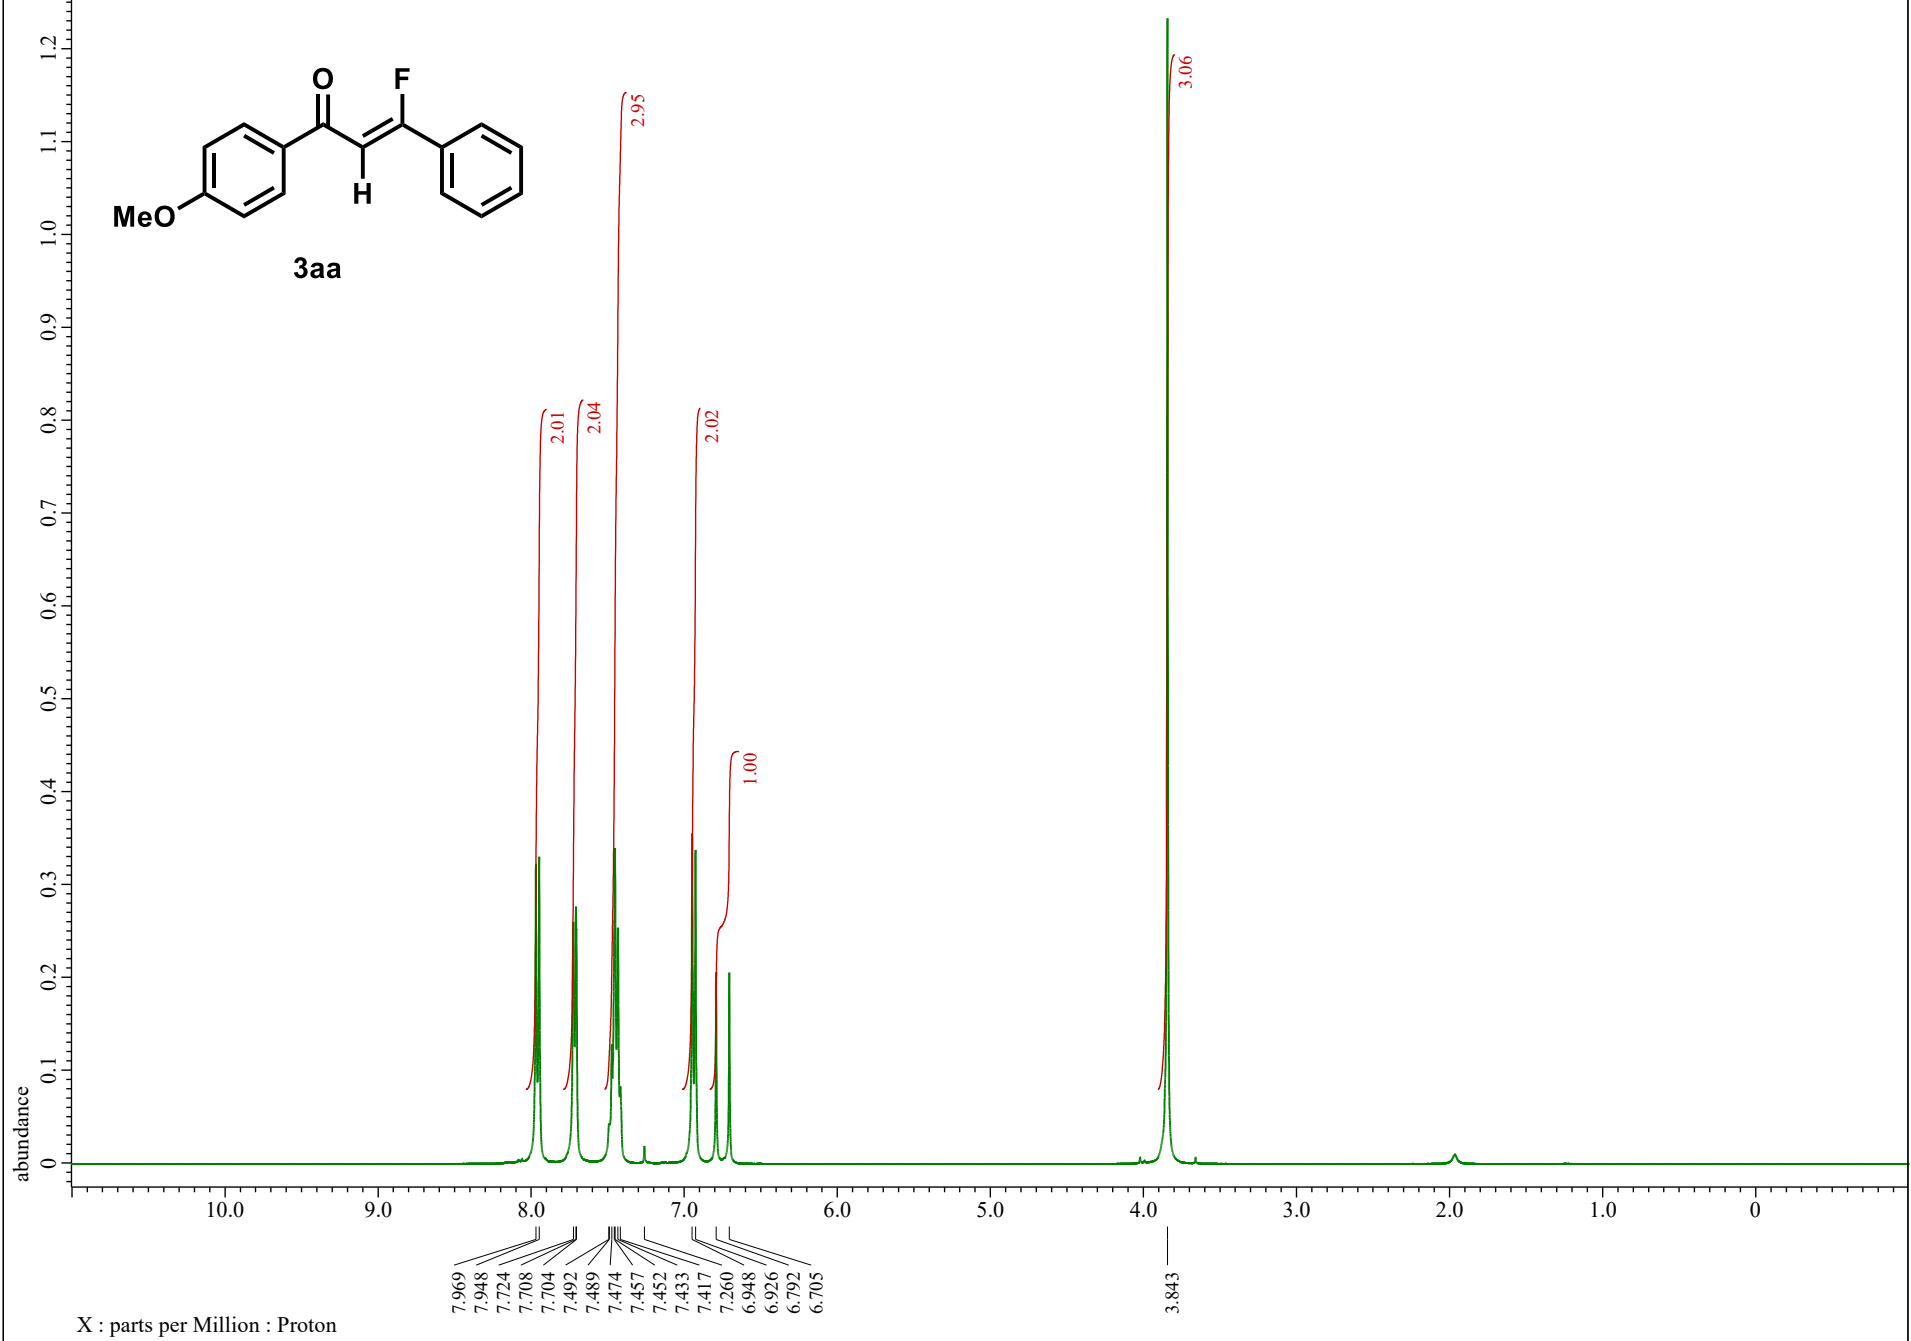

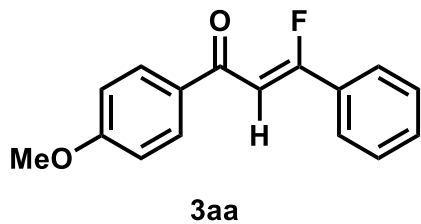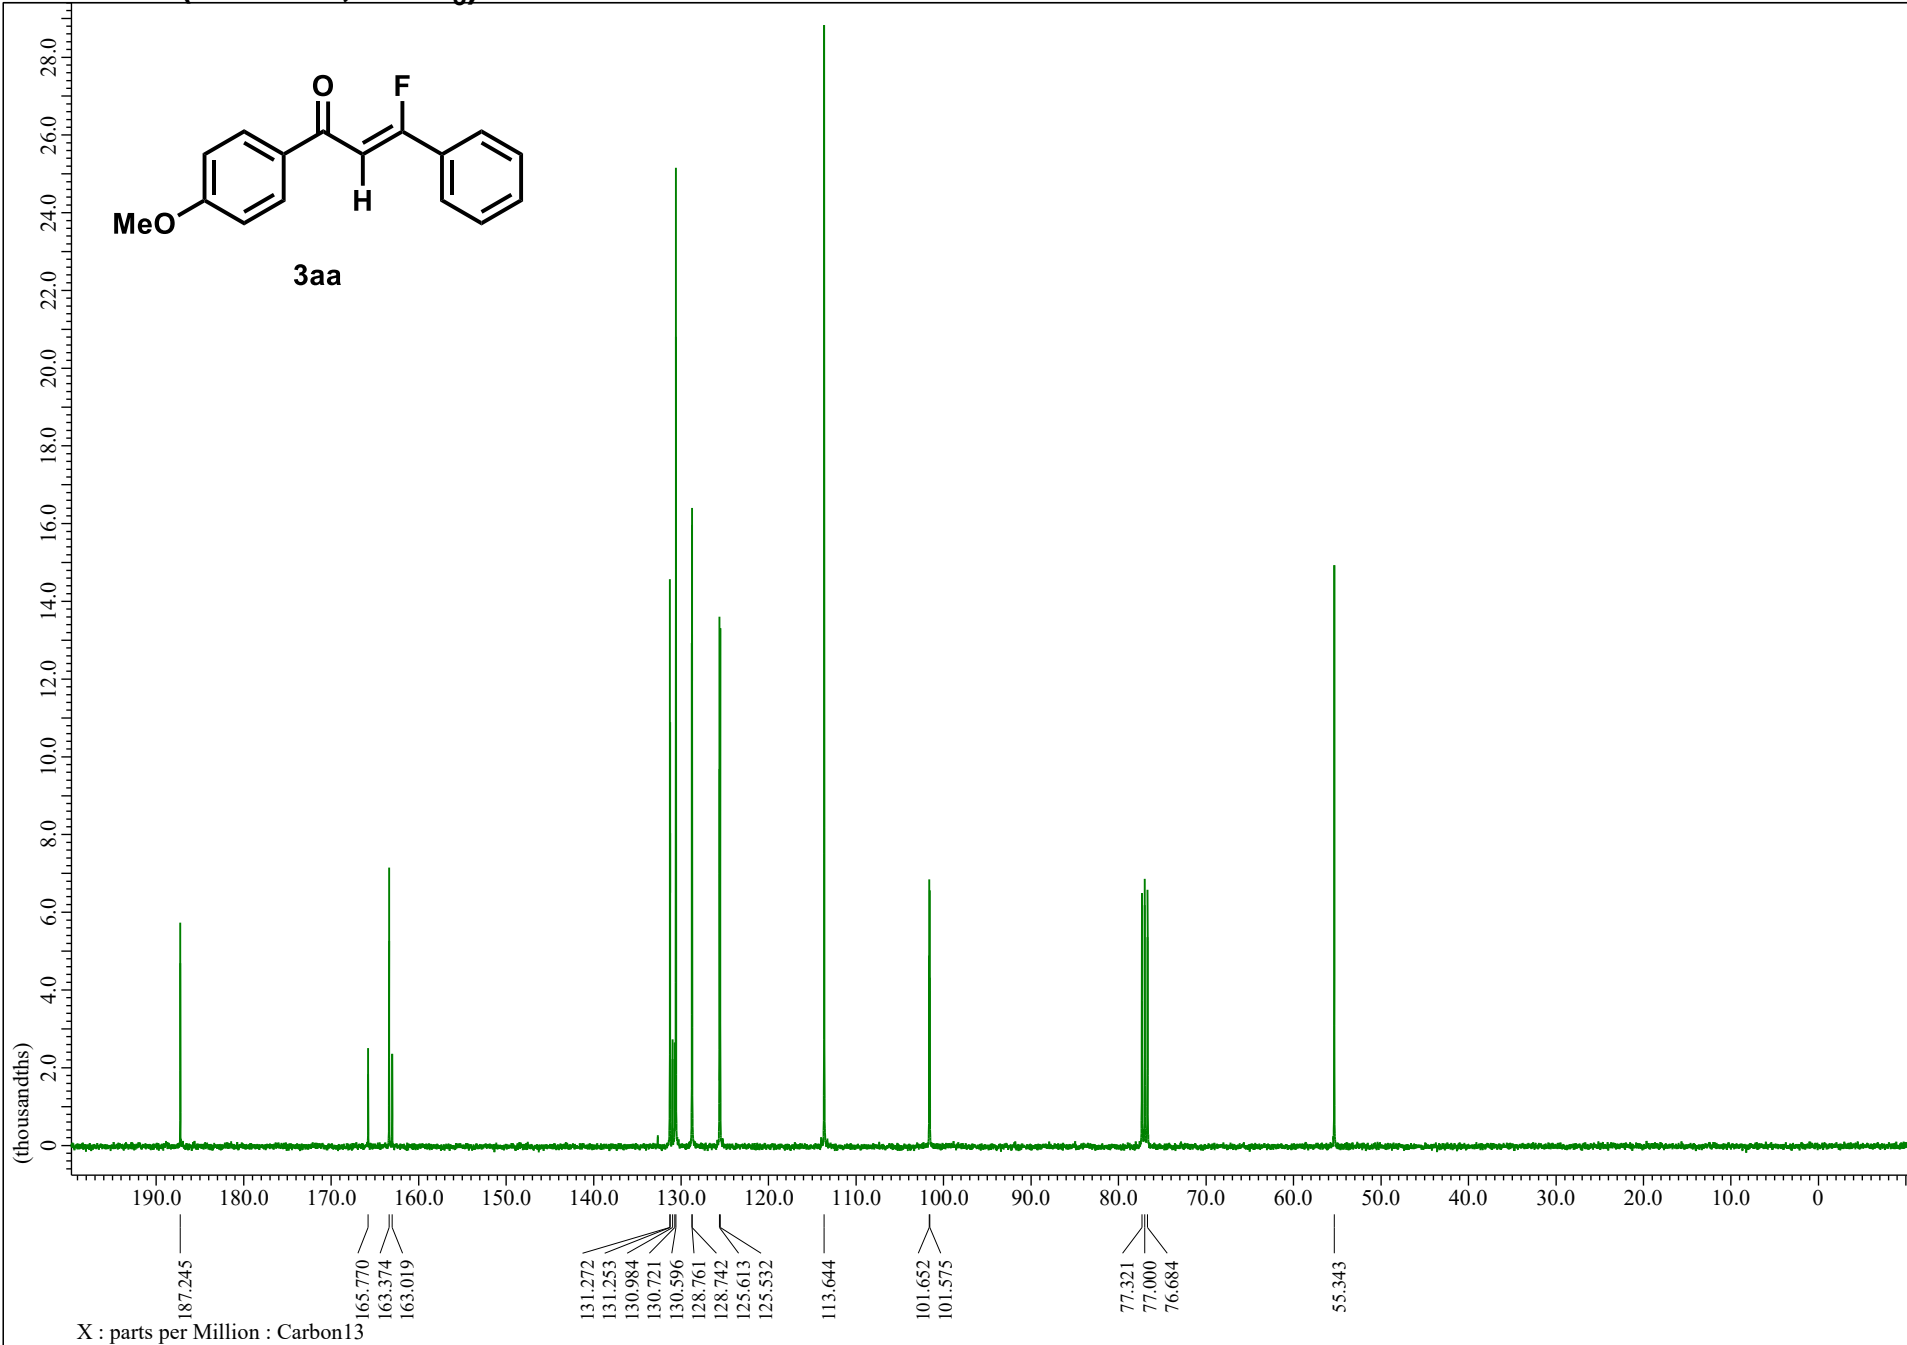

**<sup>19</sup>F NMR (376 MHz, CDCl<sub>3</sub>)**

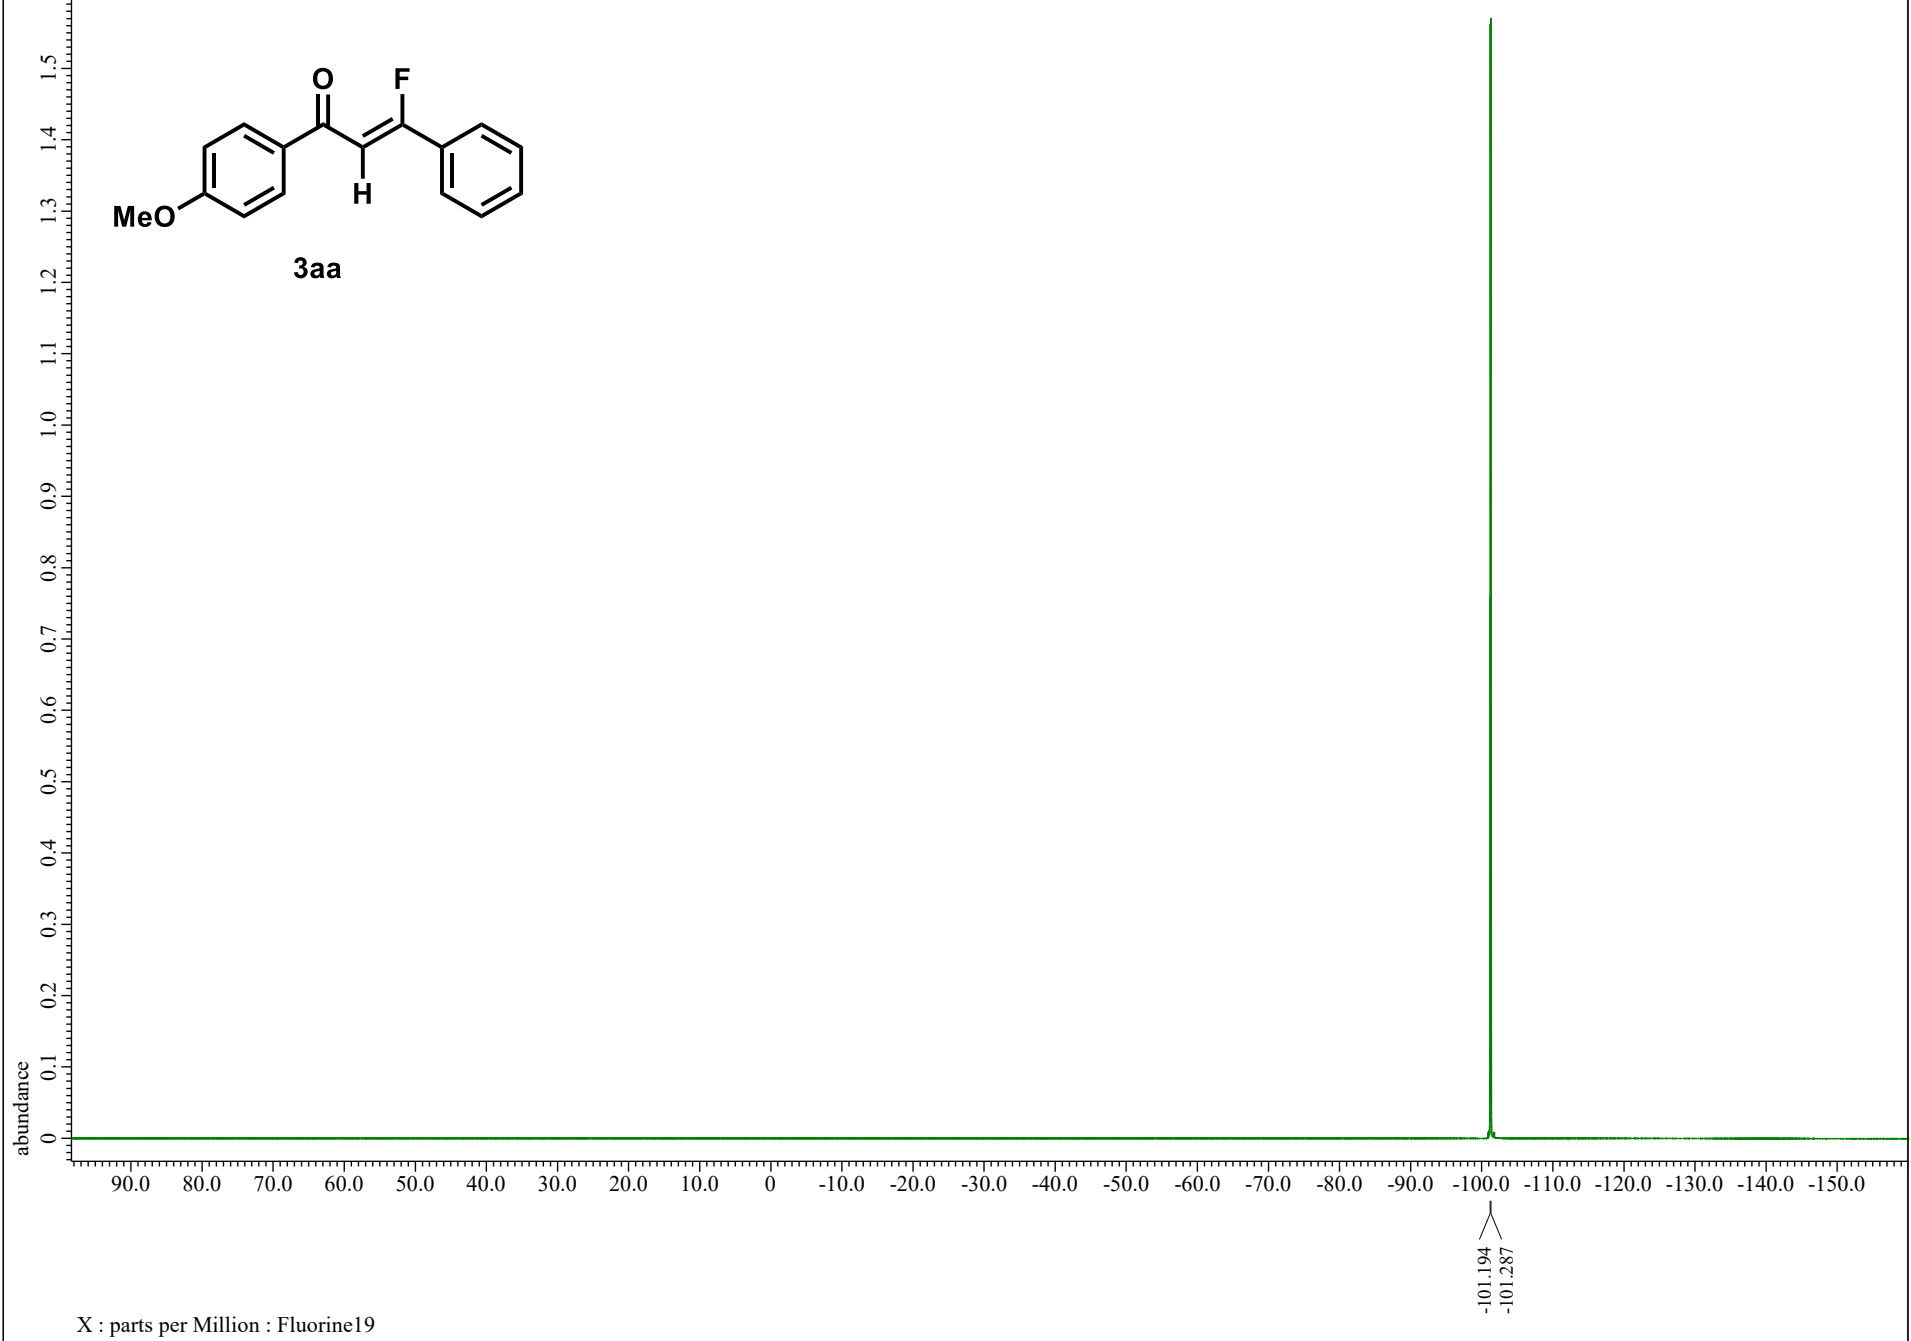

# $^1\text{H}$ - $^{19}\text{F}$ HOESY ( $\text{CDCl}_3$ )

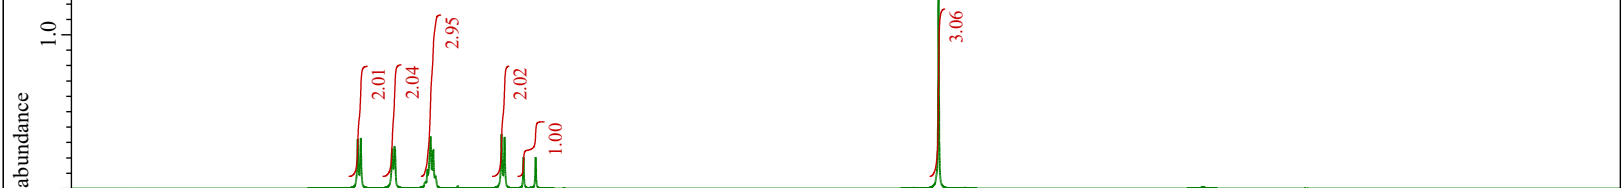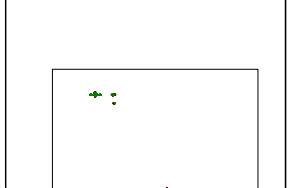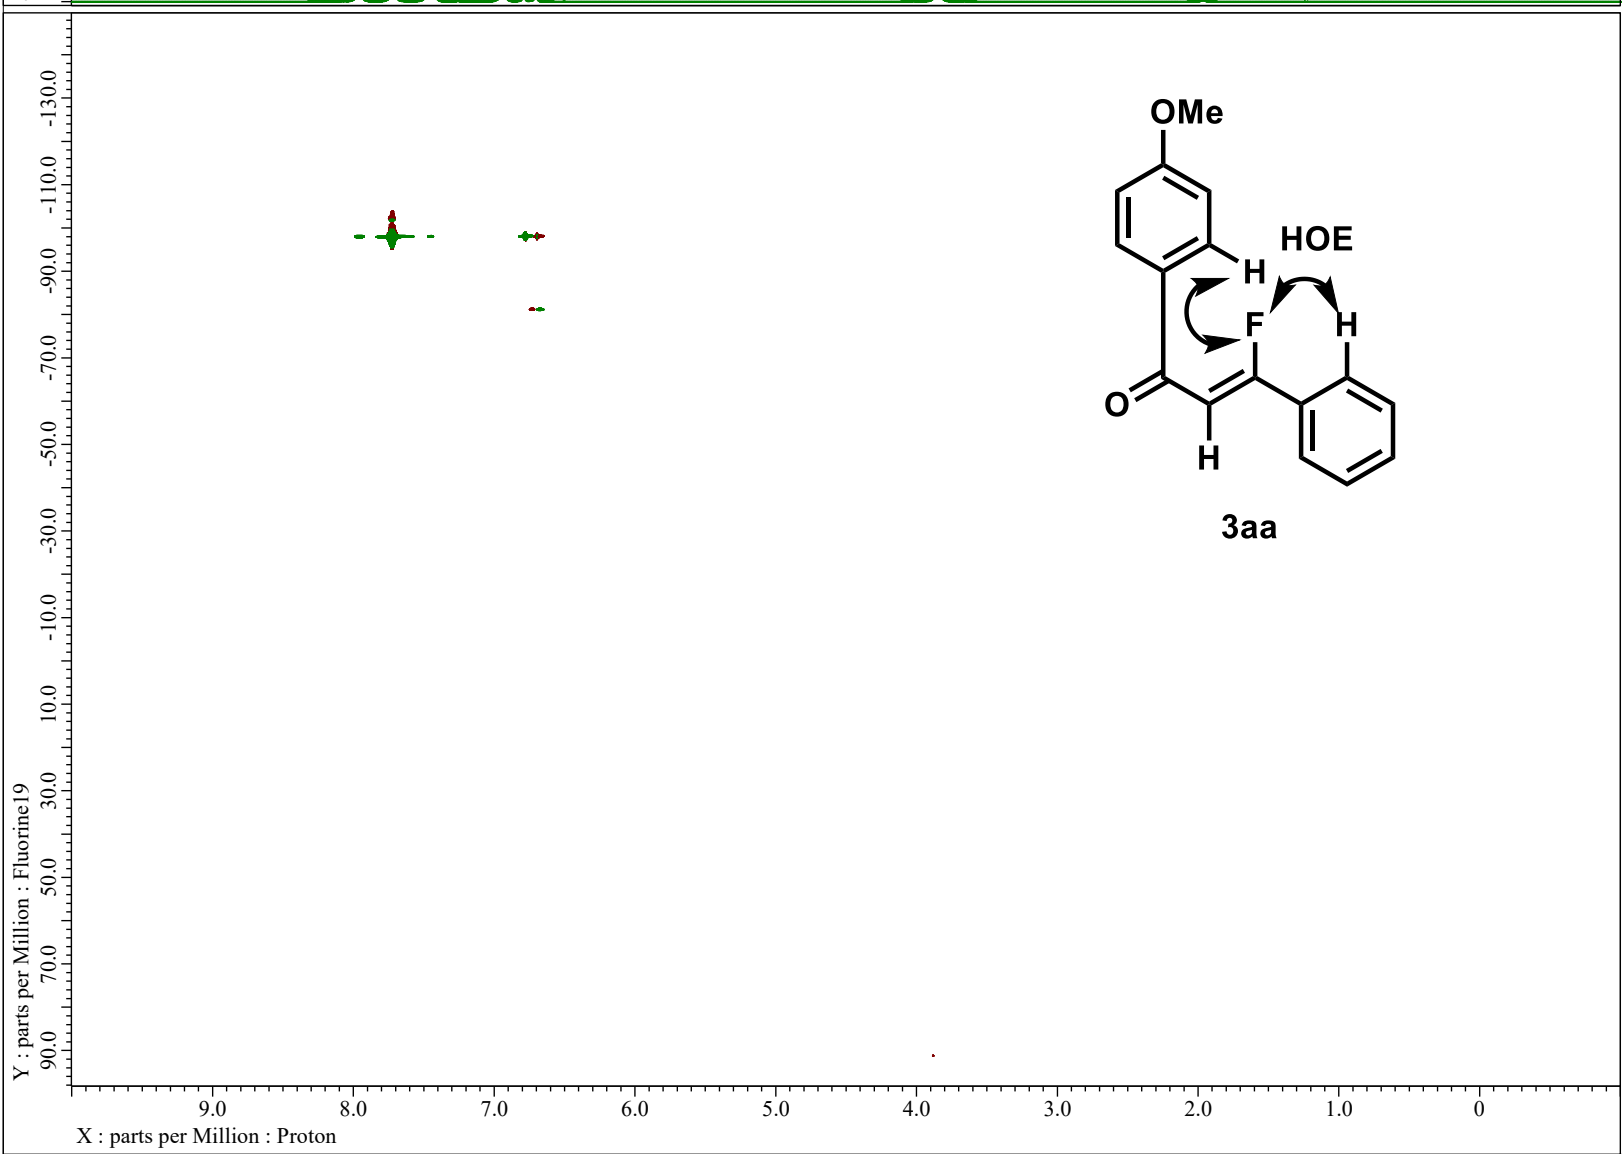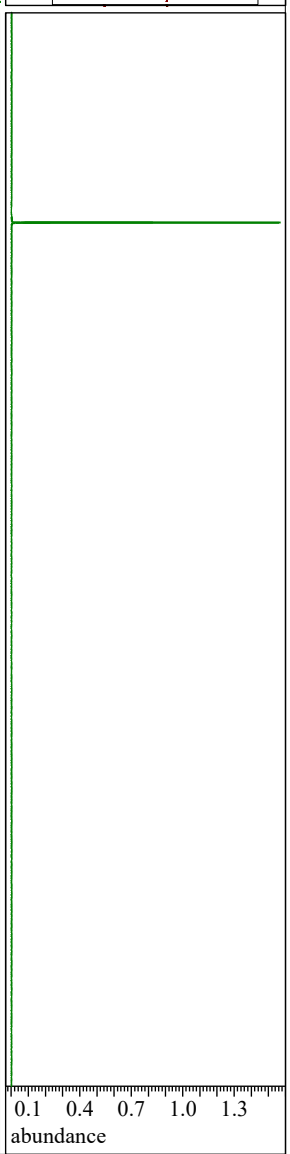

<sup>1</sup>H NMR (400 MHz, CDCl<sub>3</sub>)

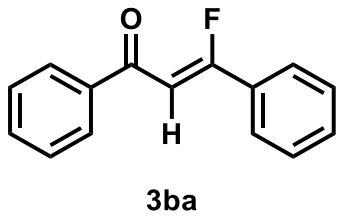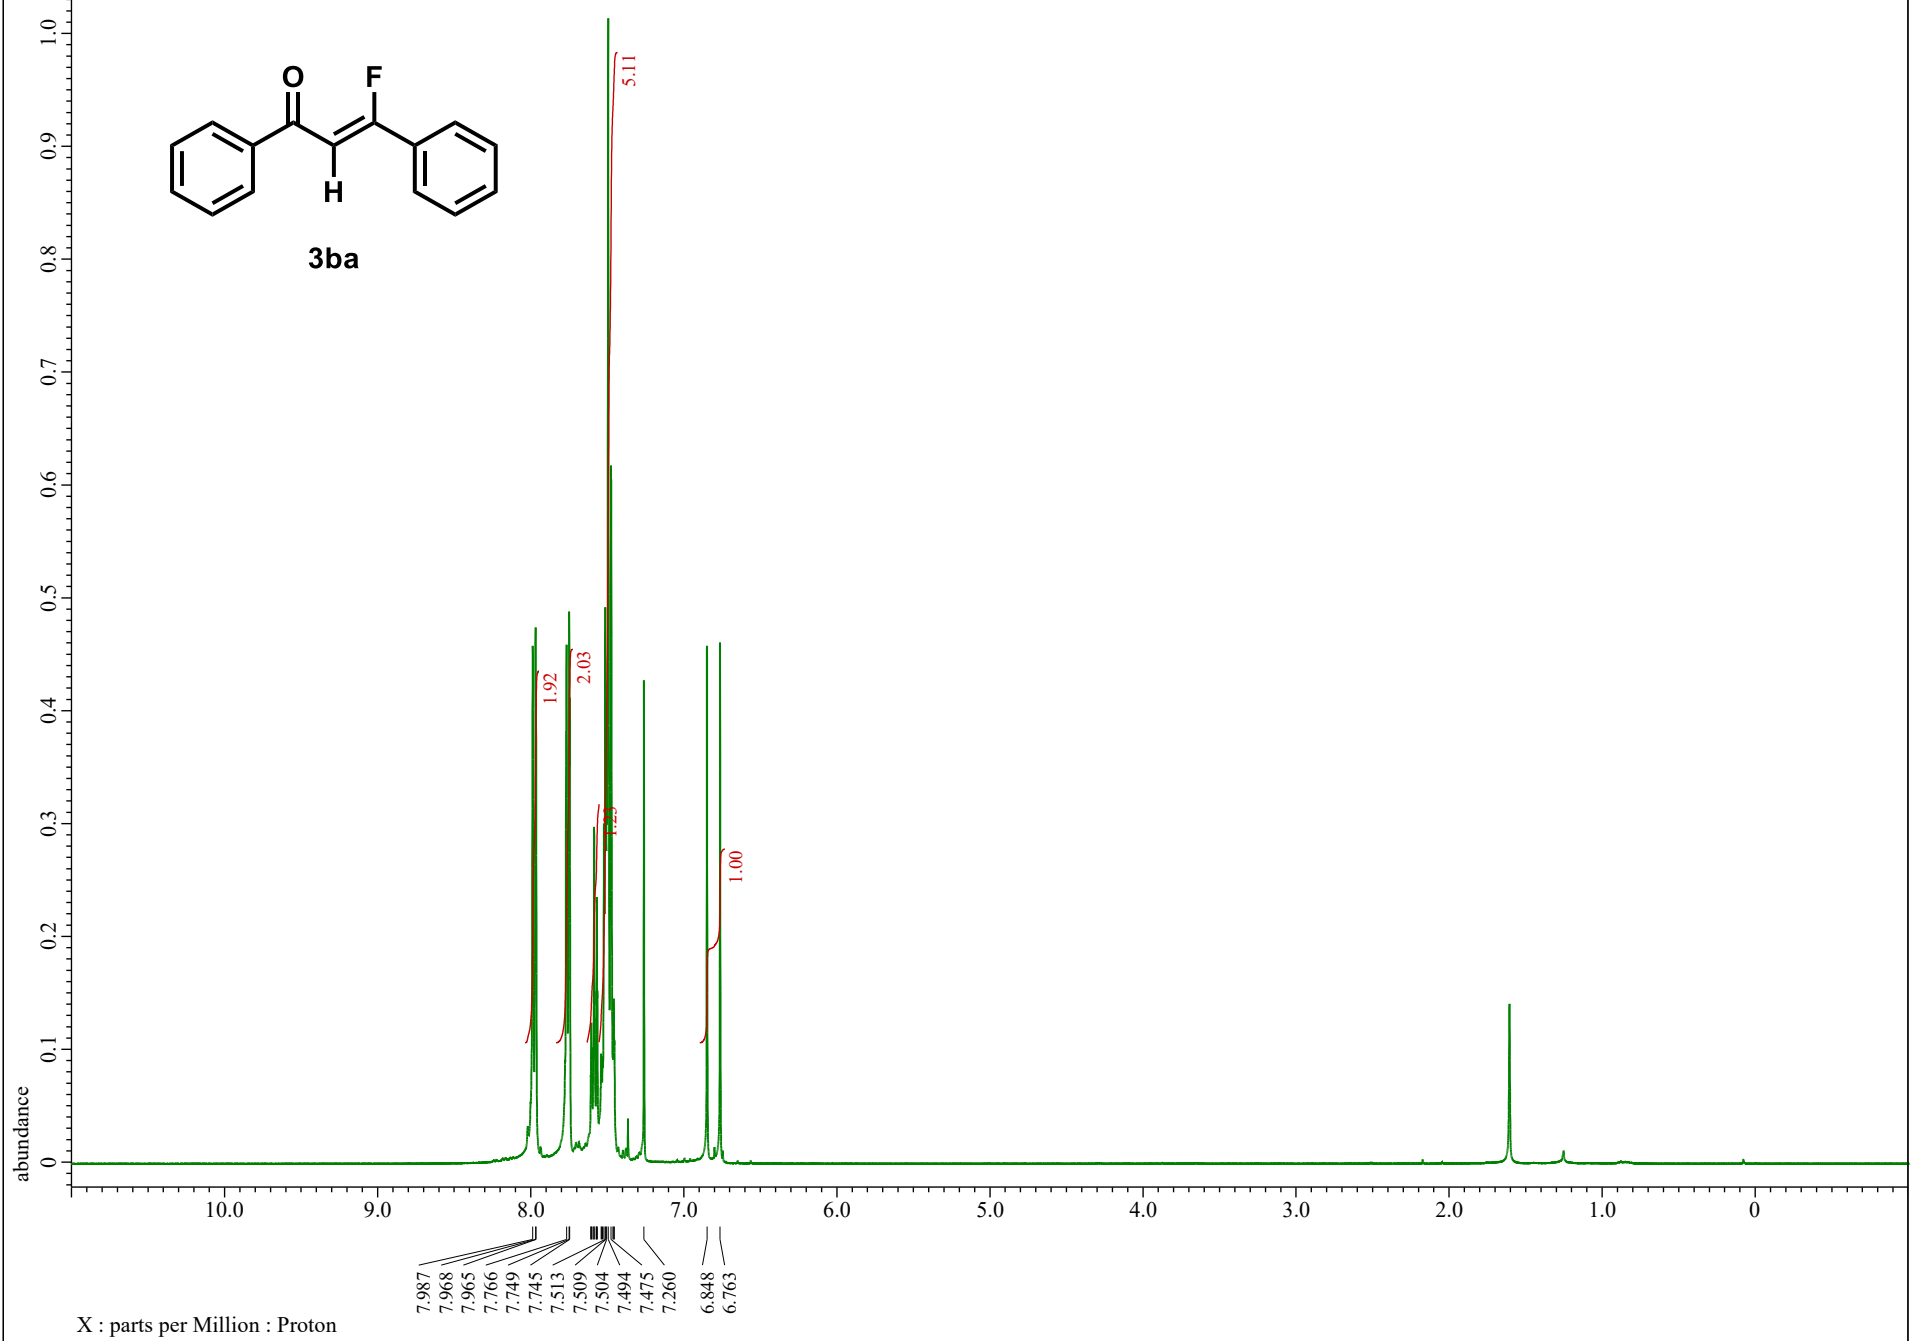

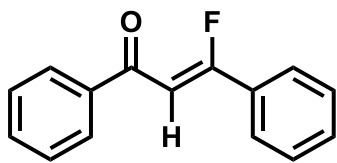

**3ba**

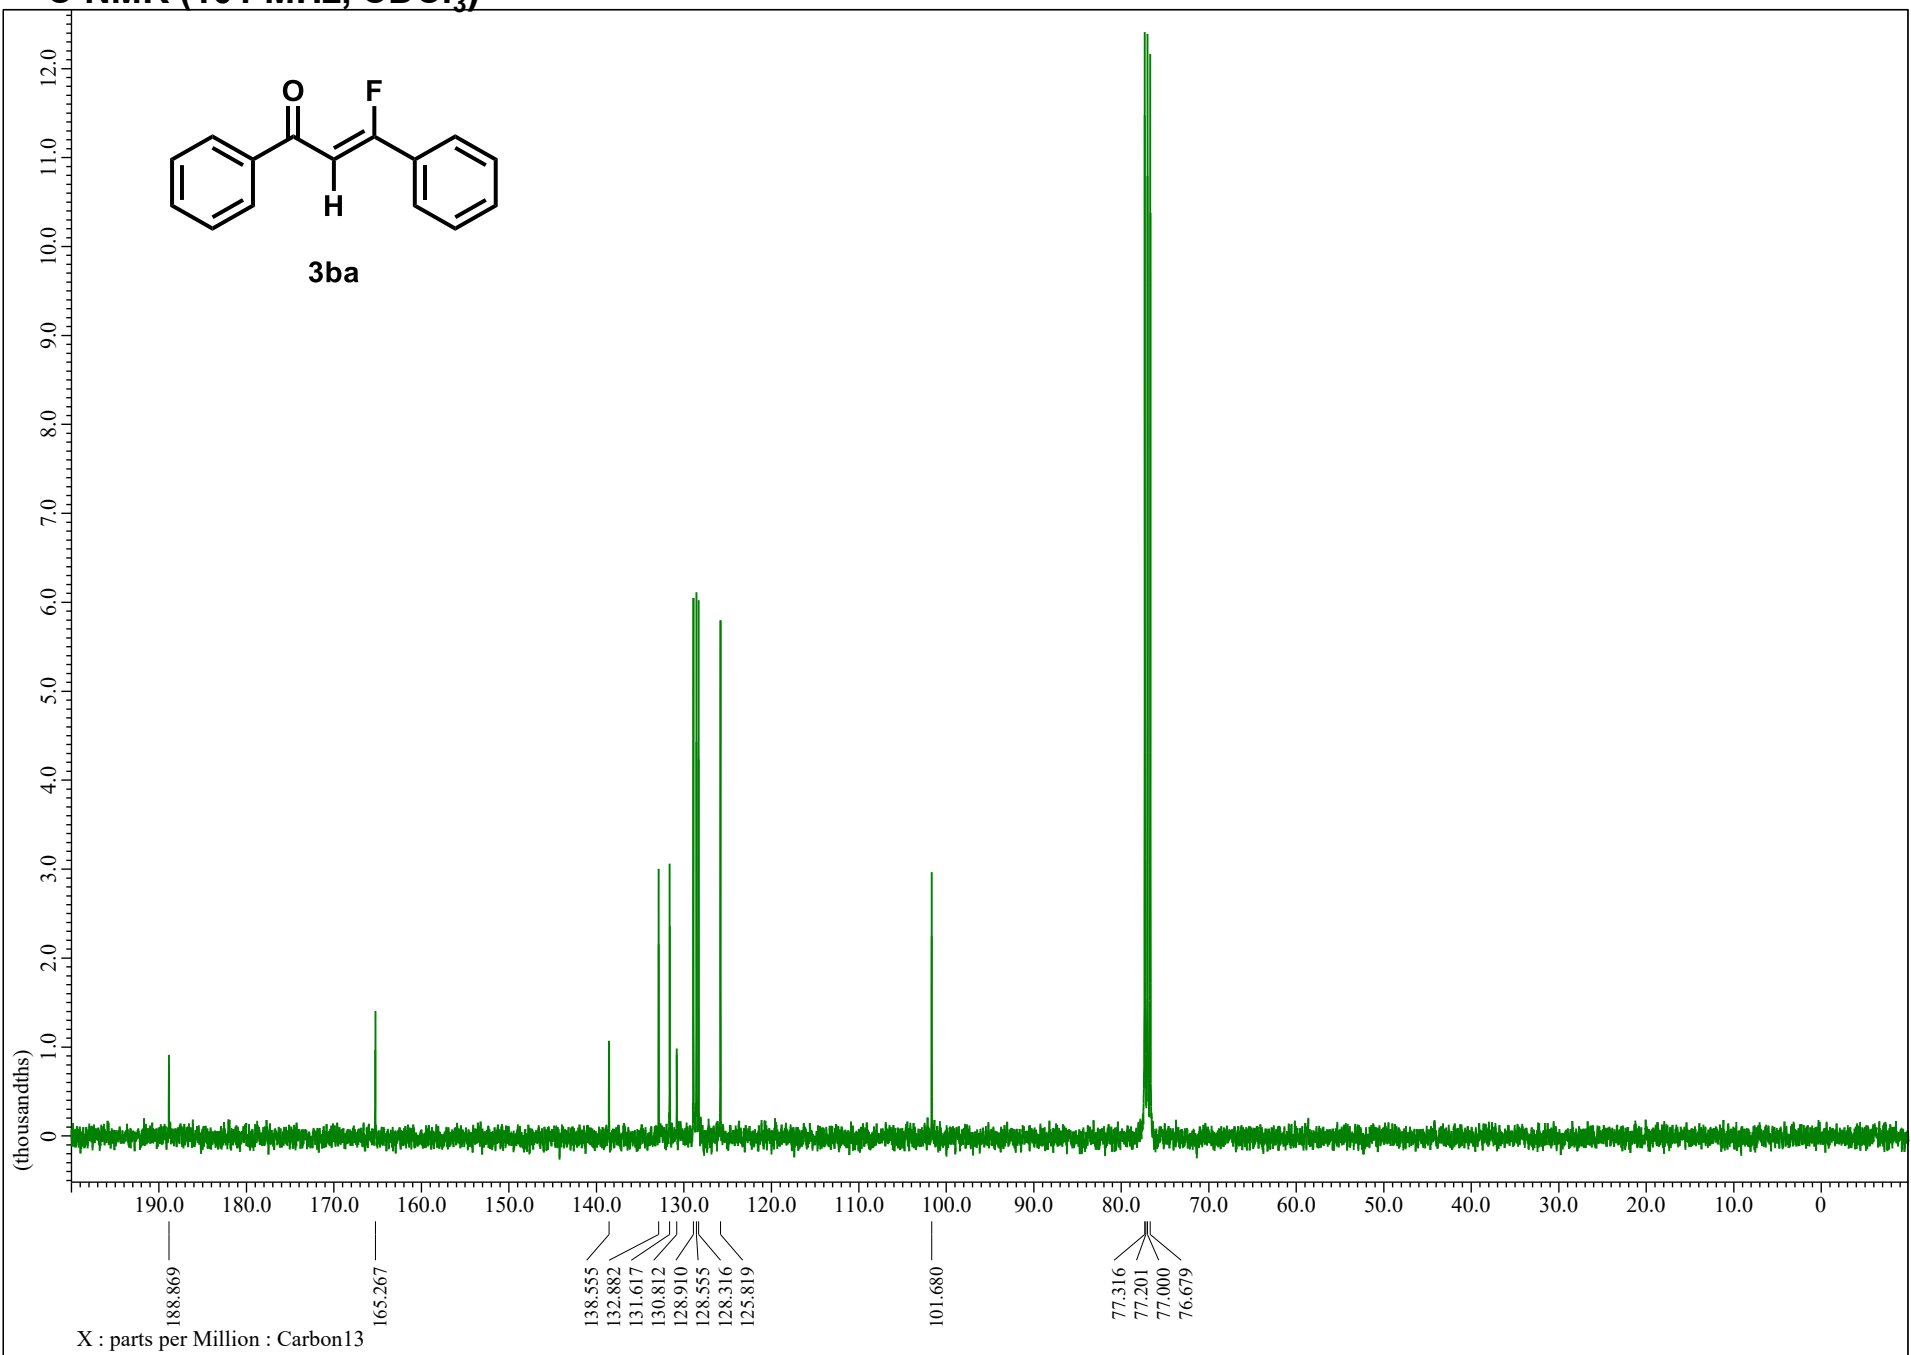

X : parts per Million : Carbon13

**<sup>19</sup>F NMR (376 MHz, CDCl<sub>3</sub>)**



+ *E* isomer

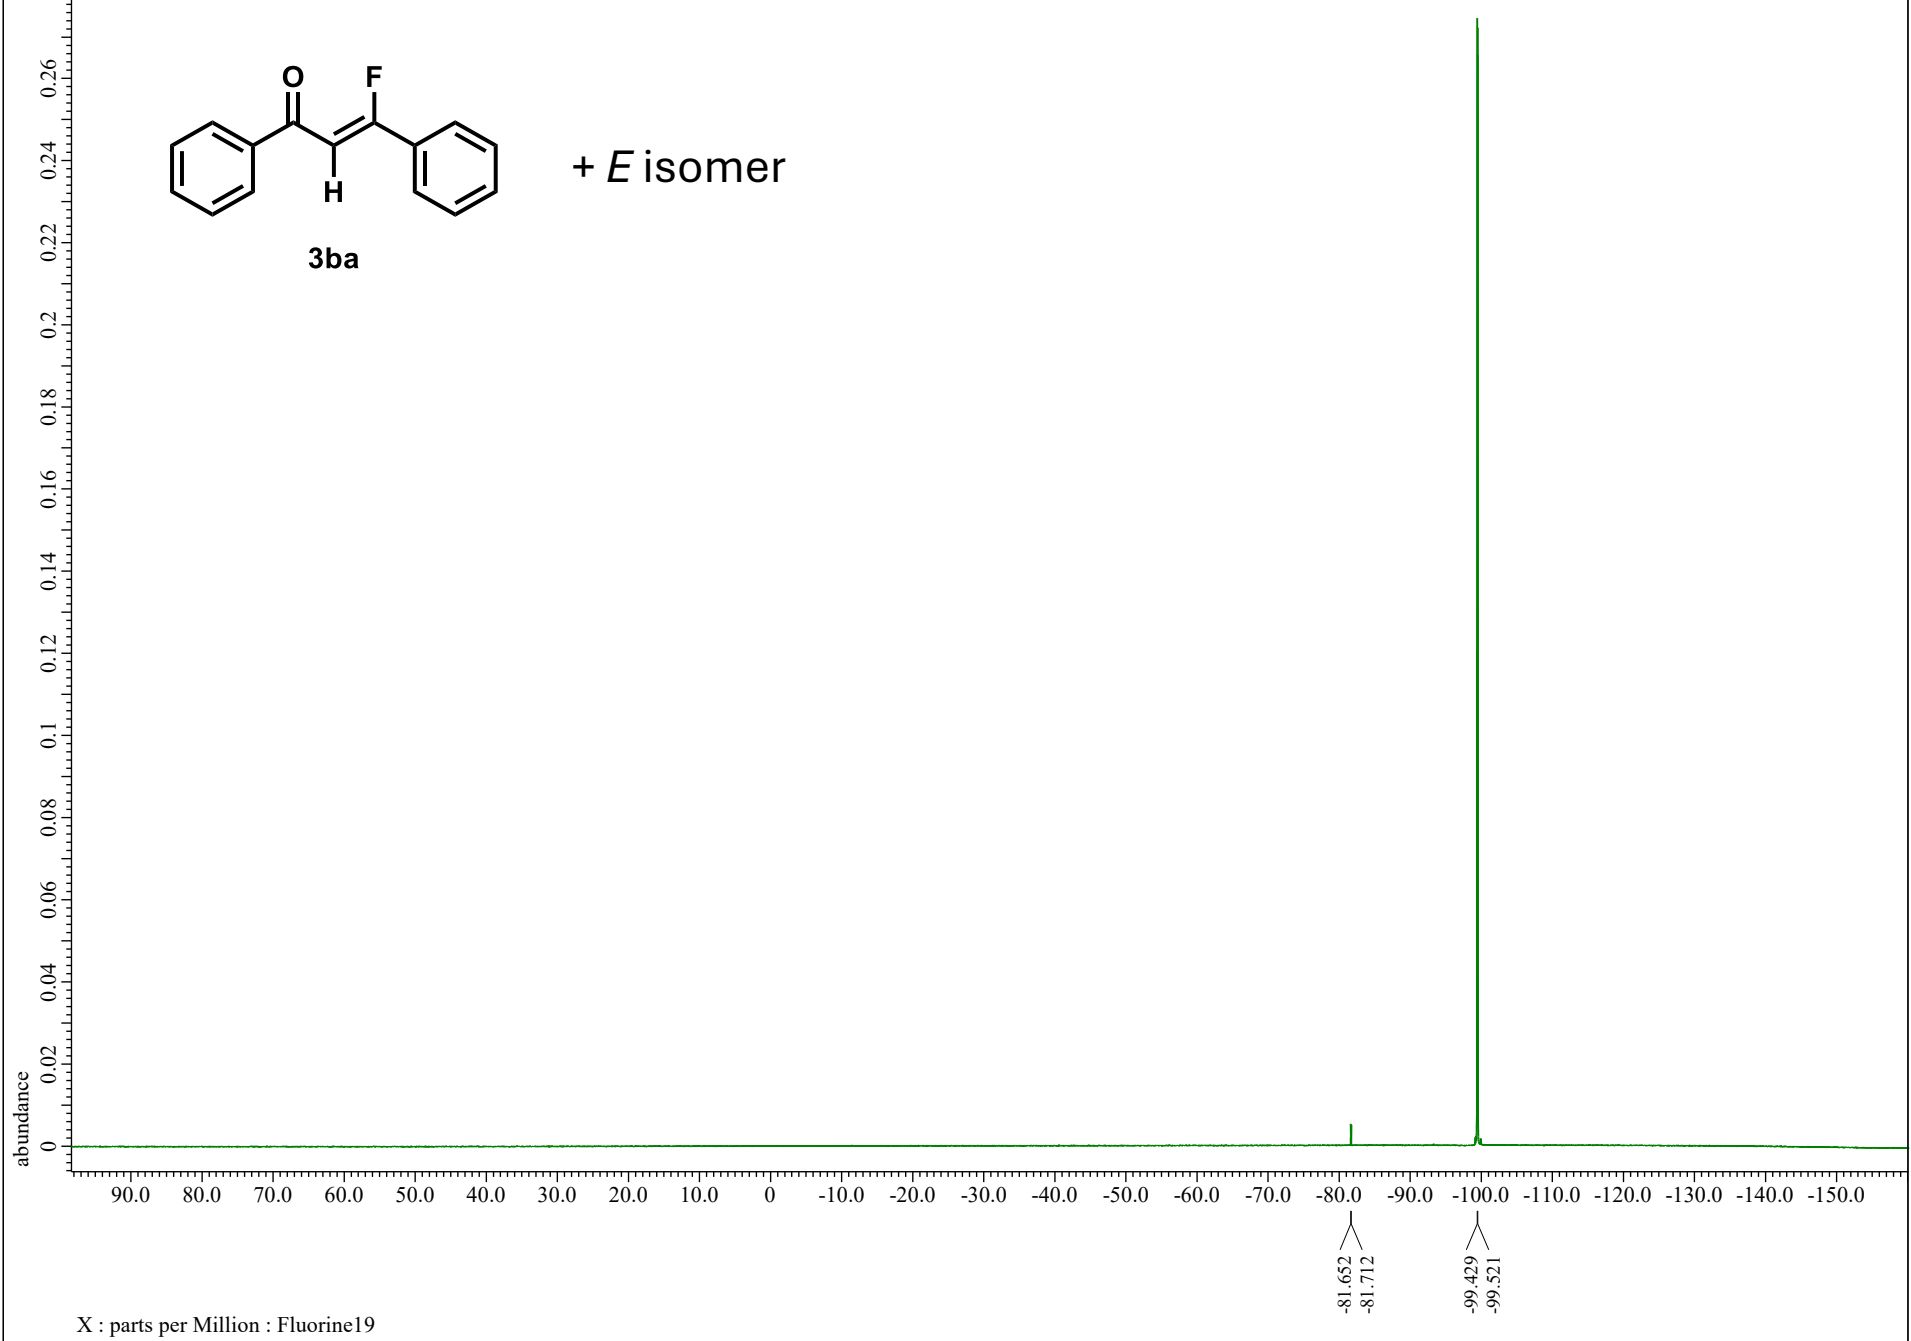

X : parts per Million : Fluorine19

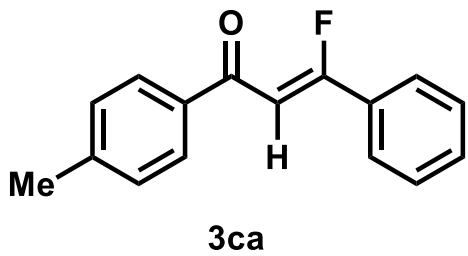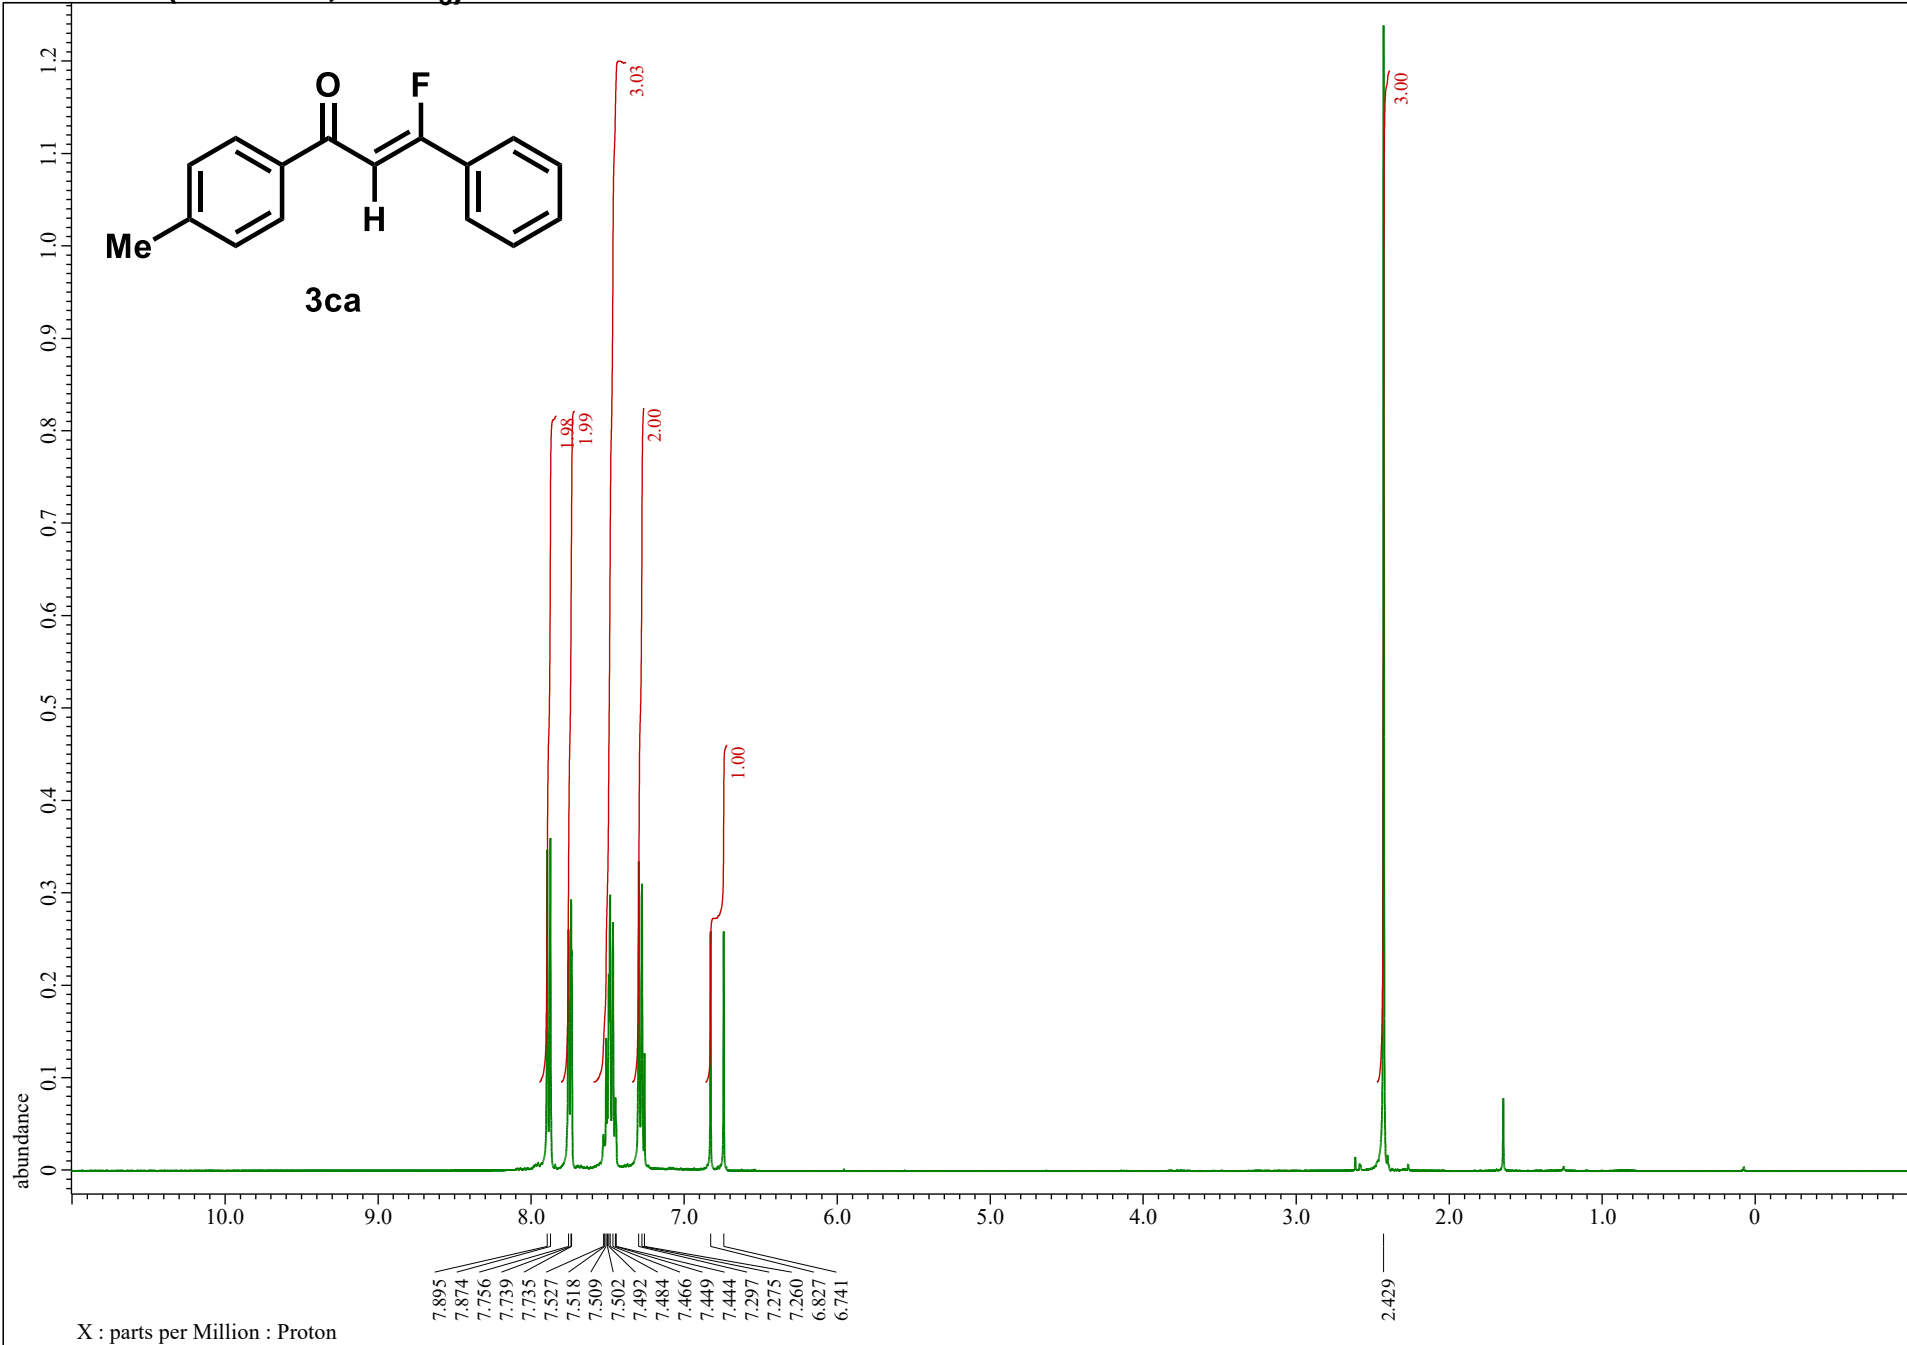

<sup>13</sup>C NMR (101 MHz, CDCl<sub>3</sub>)

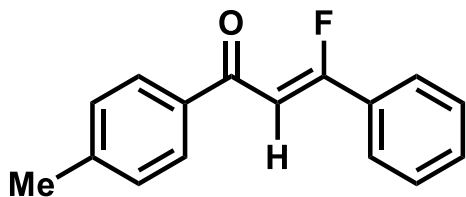

3ca

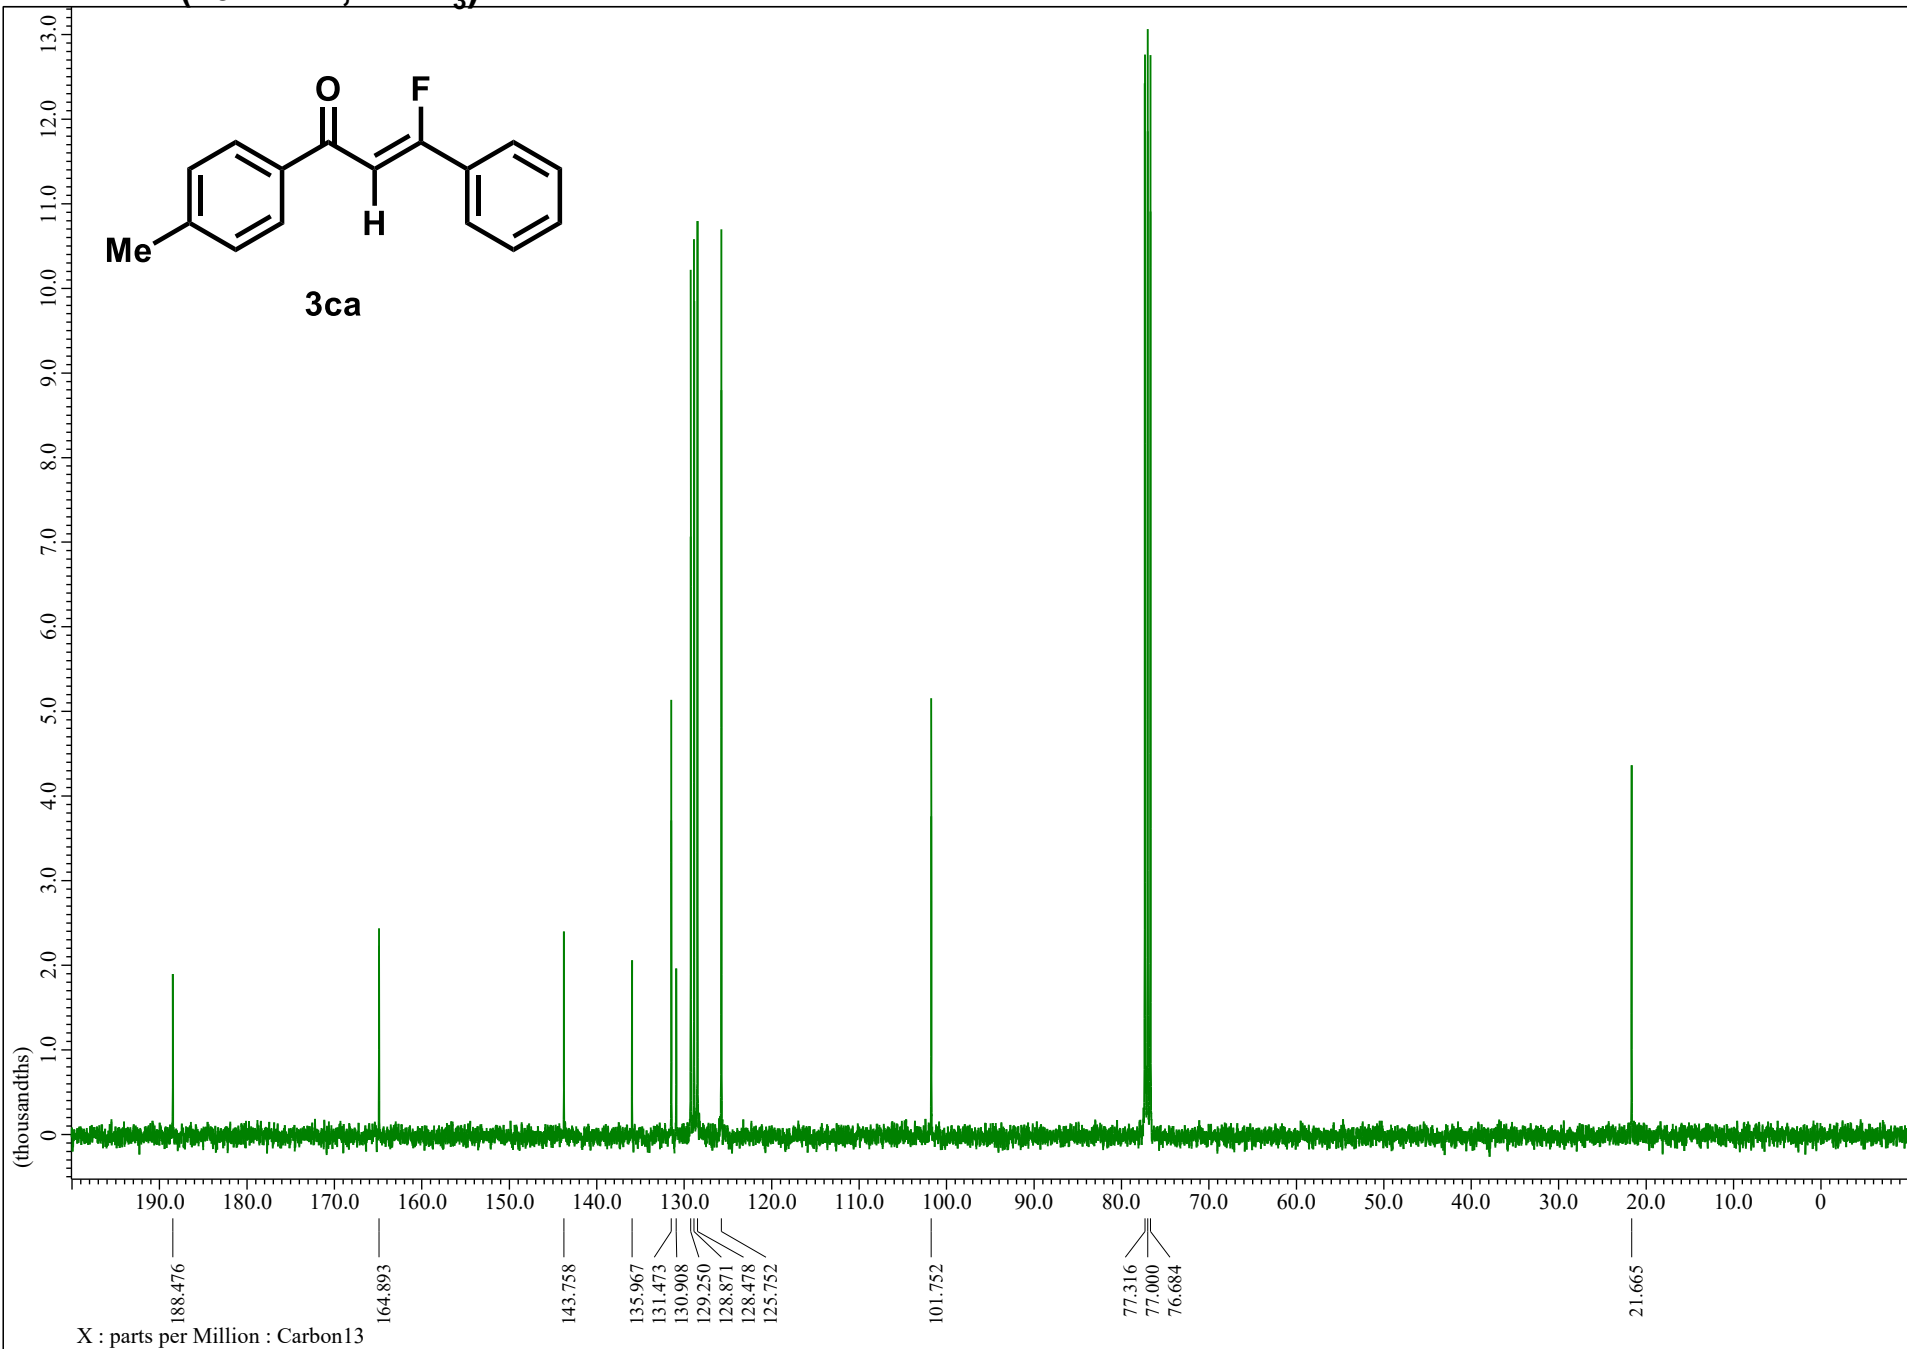

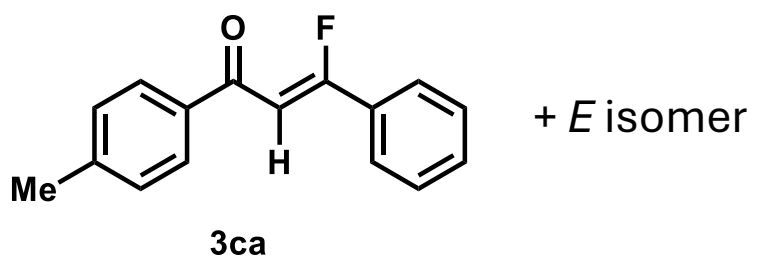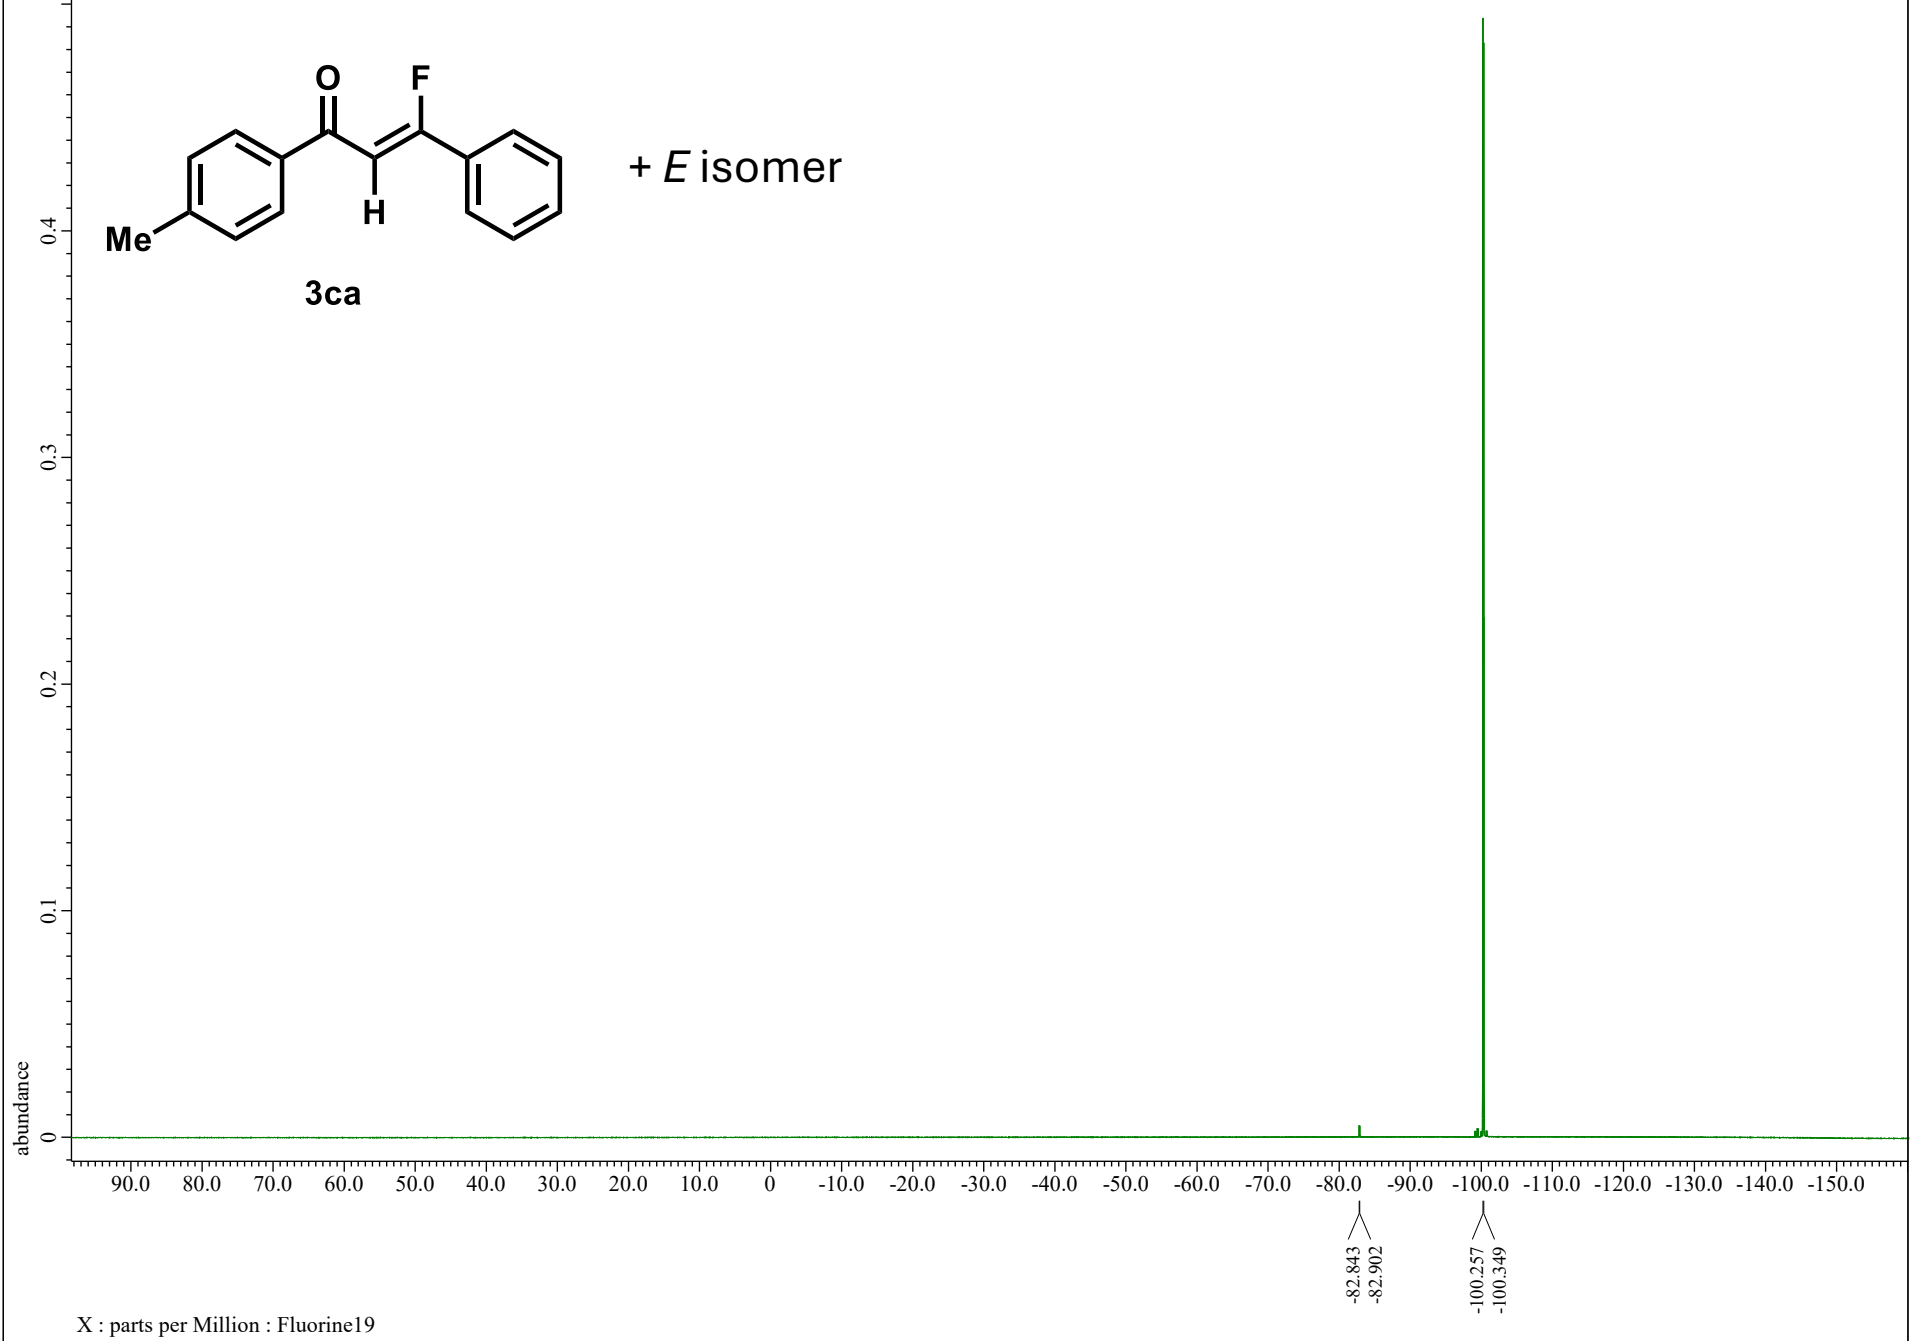

X : parts per Million : Fluorine19

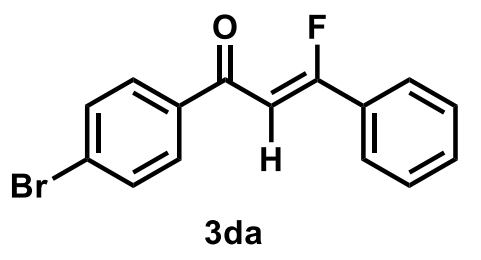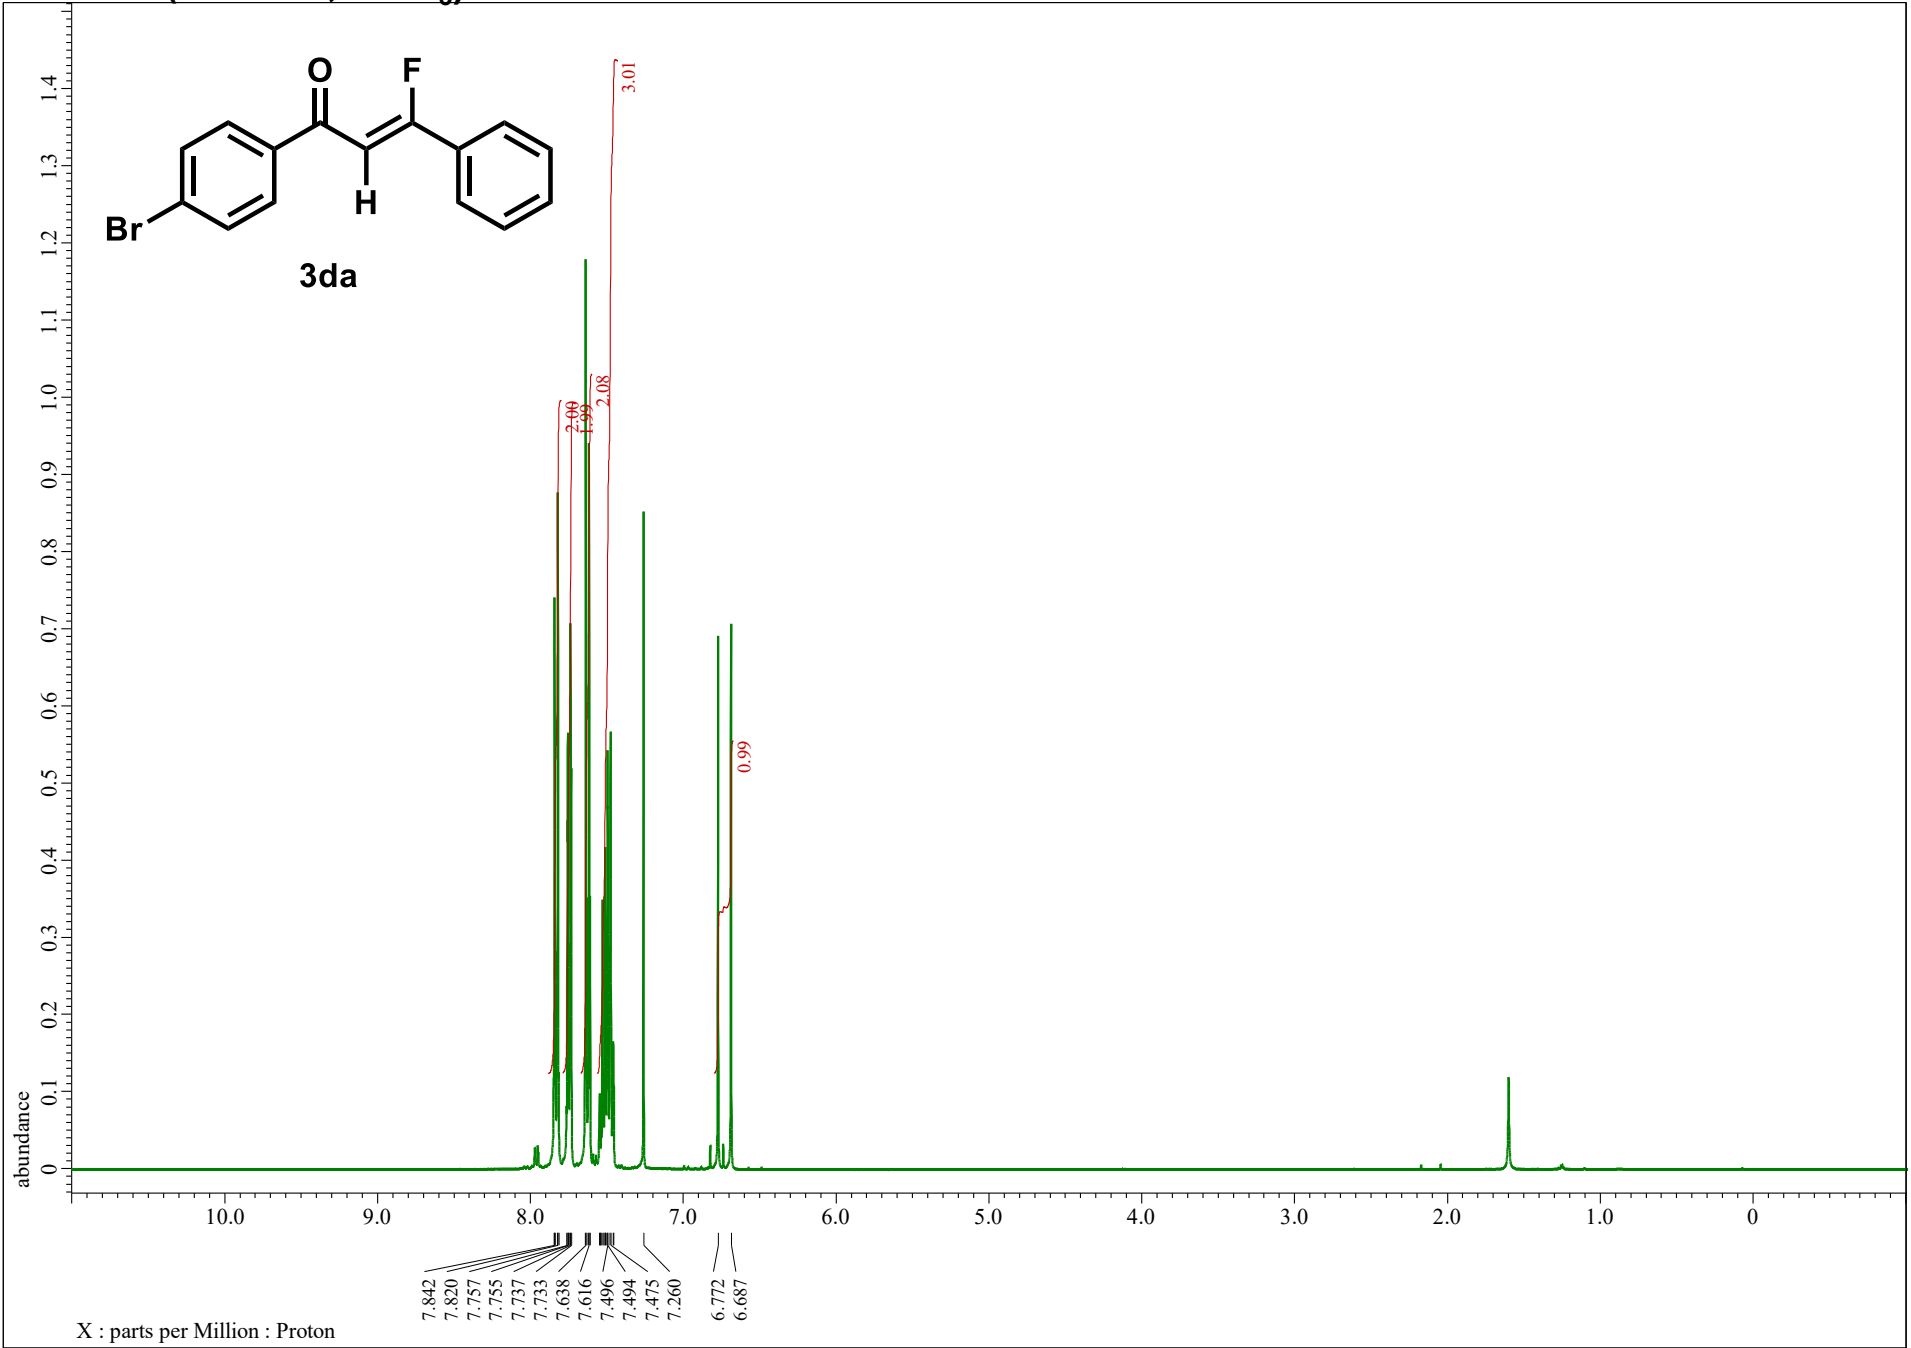

<sup>13</sup>C NMR (101 MHz, CDCl<sub>3</sub>)

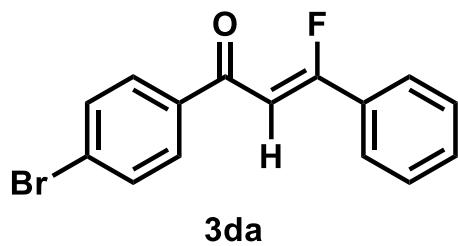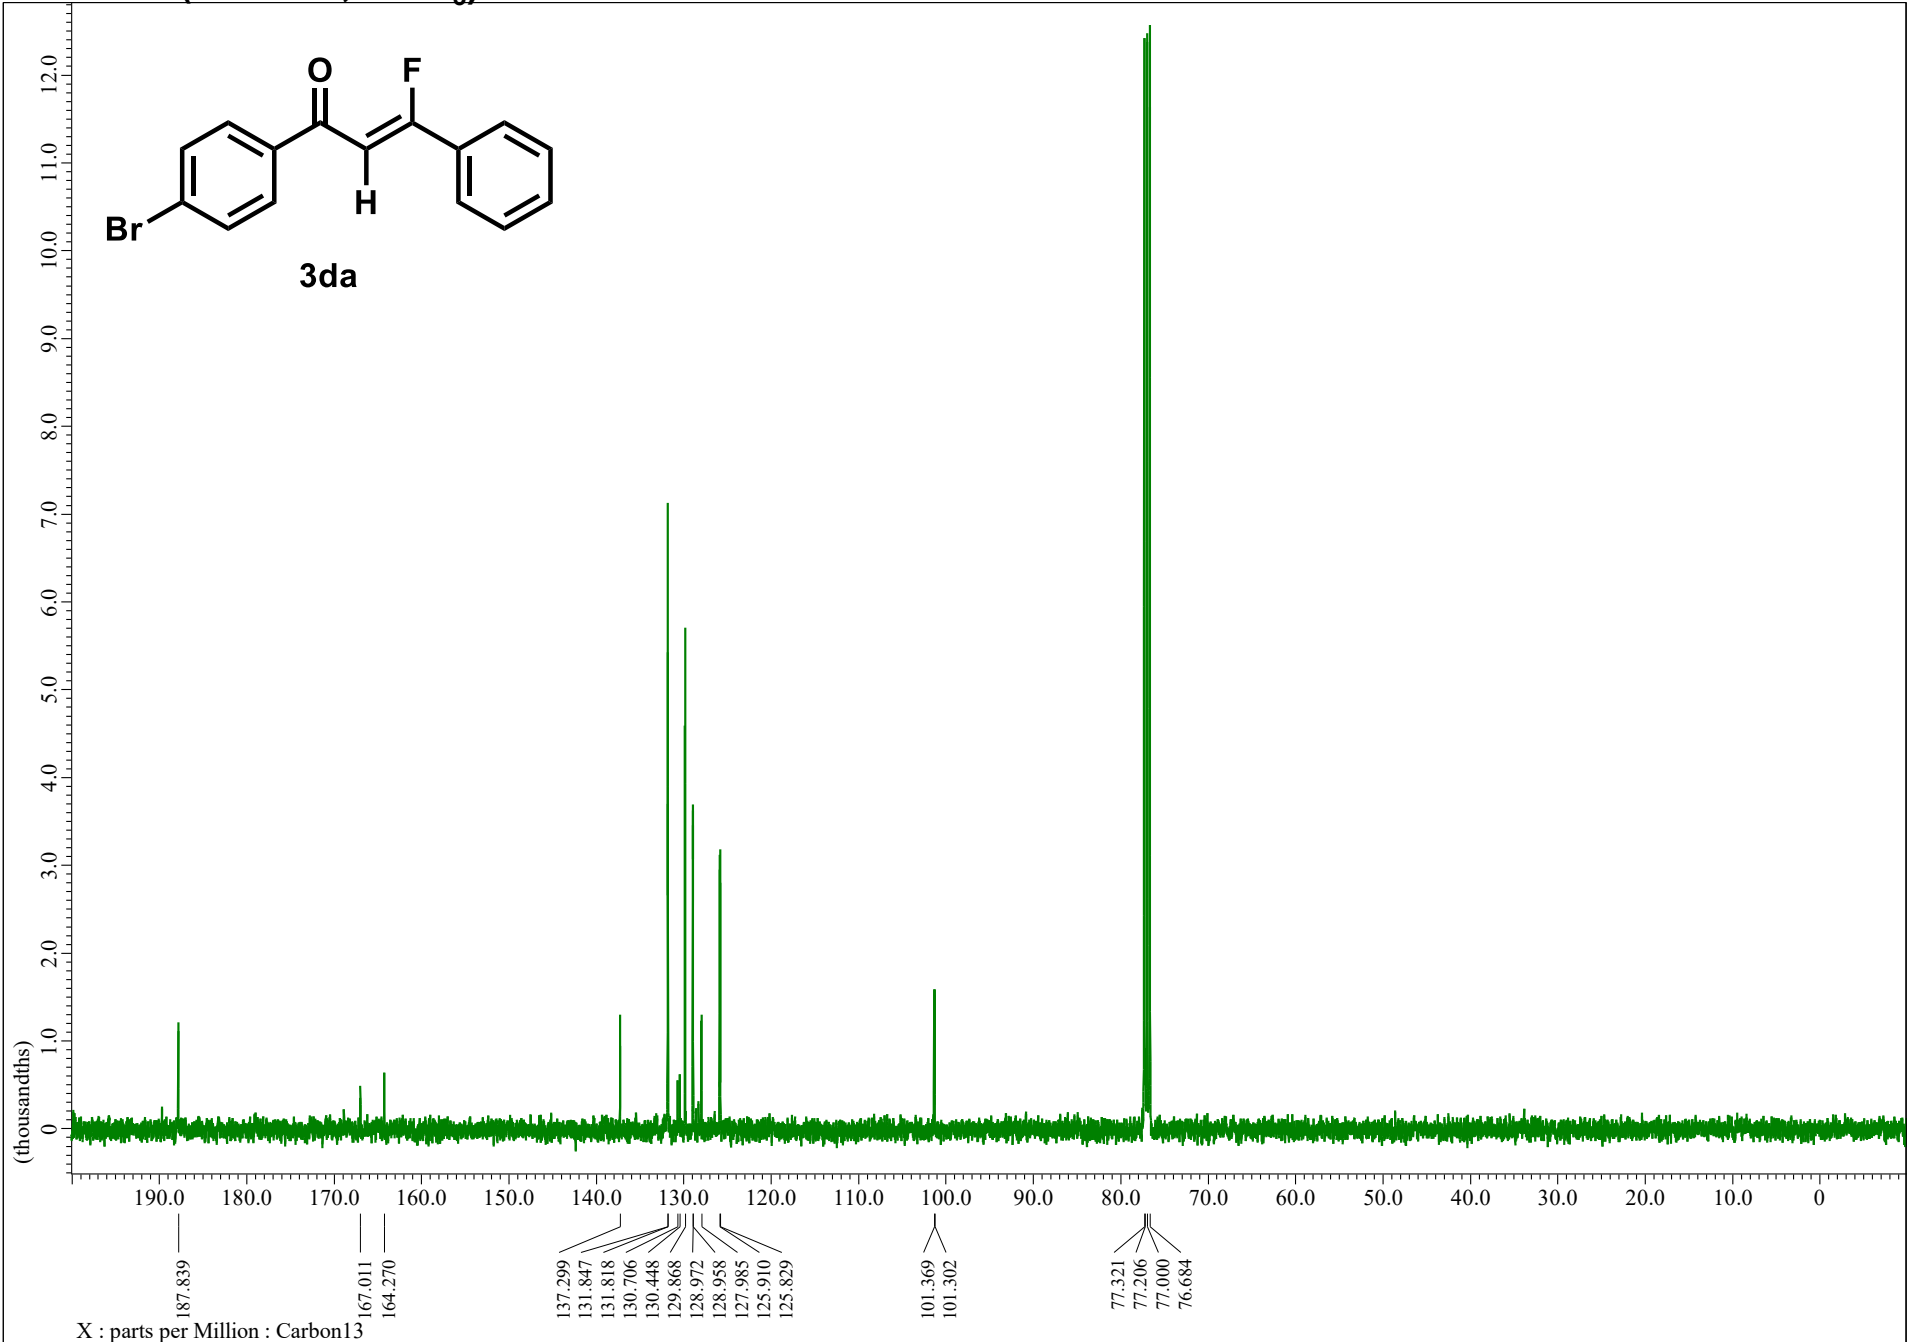

**<sup>19</sup>F NMR (376 MHz, CDCl<sub>3</sub>)**

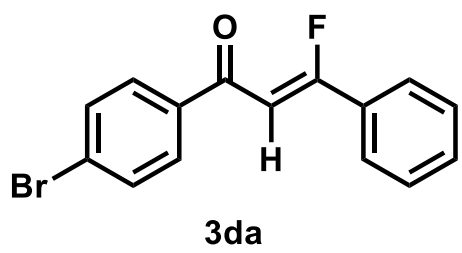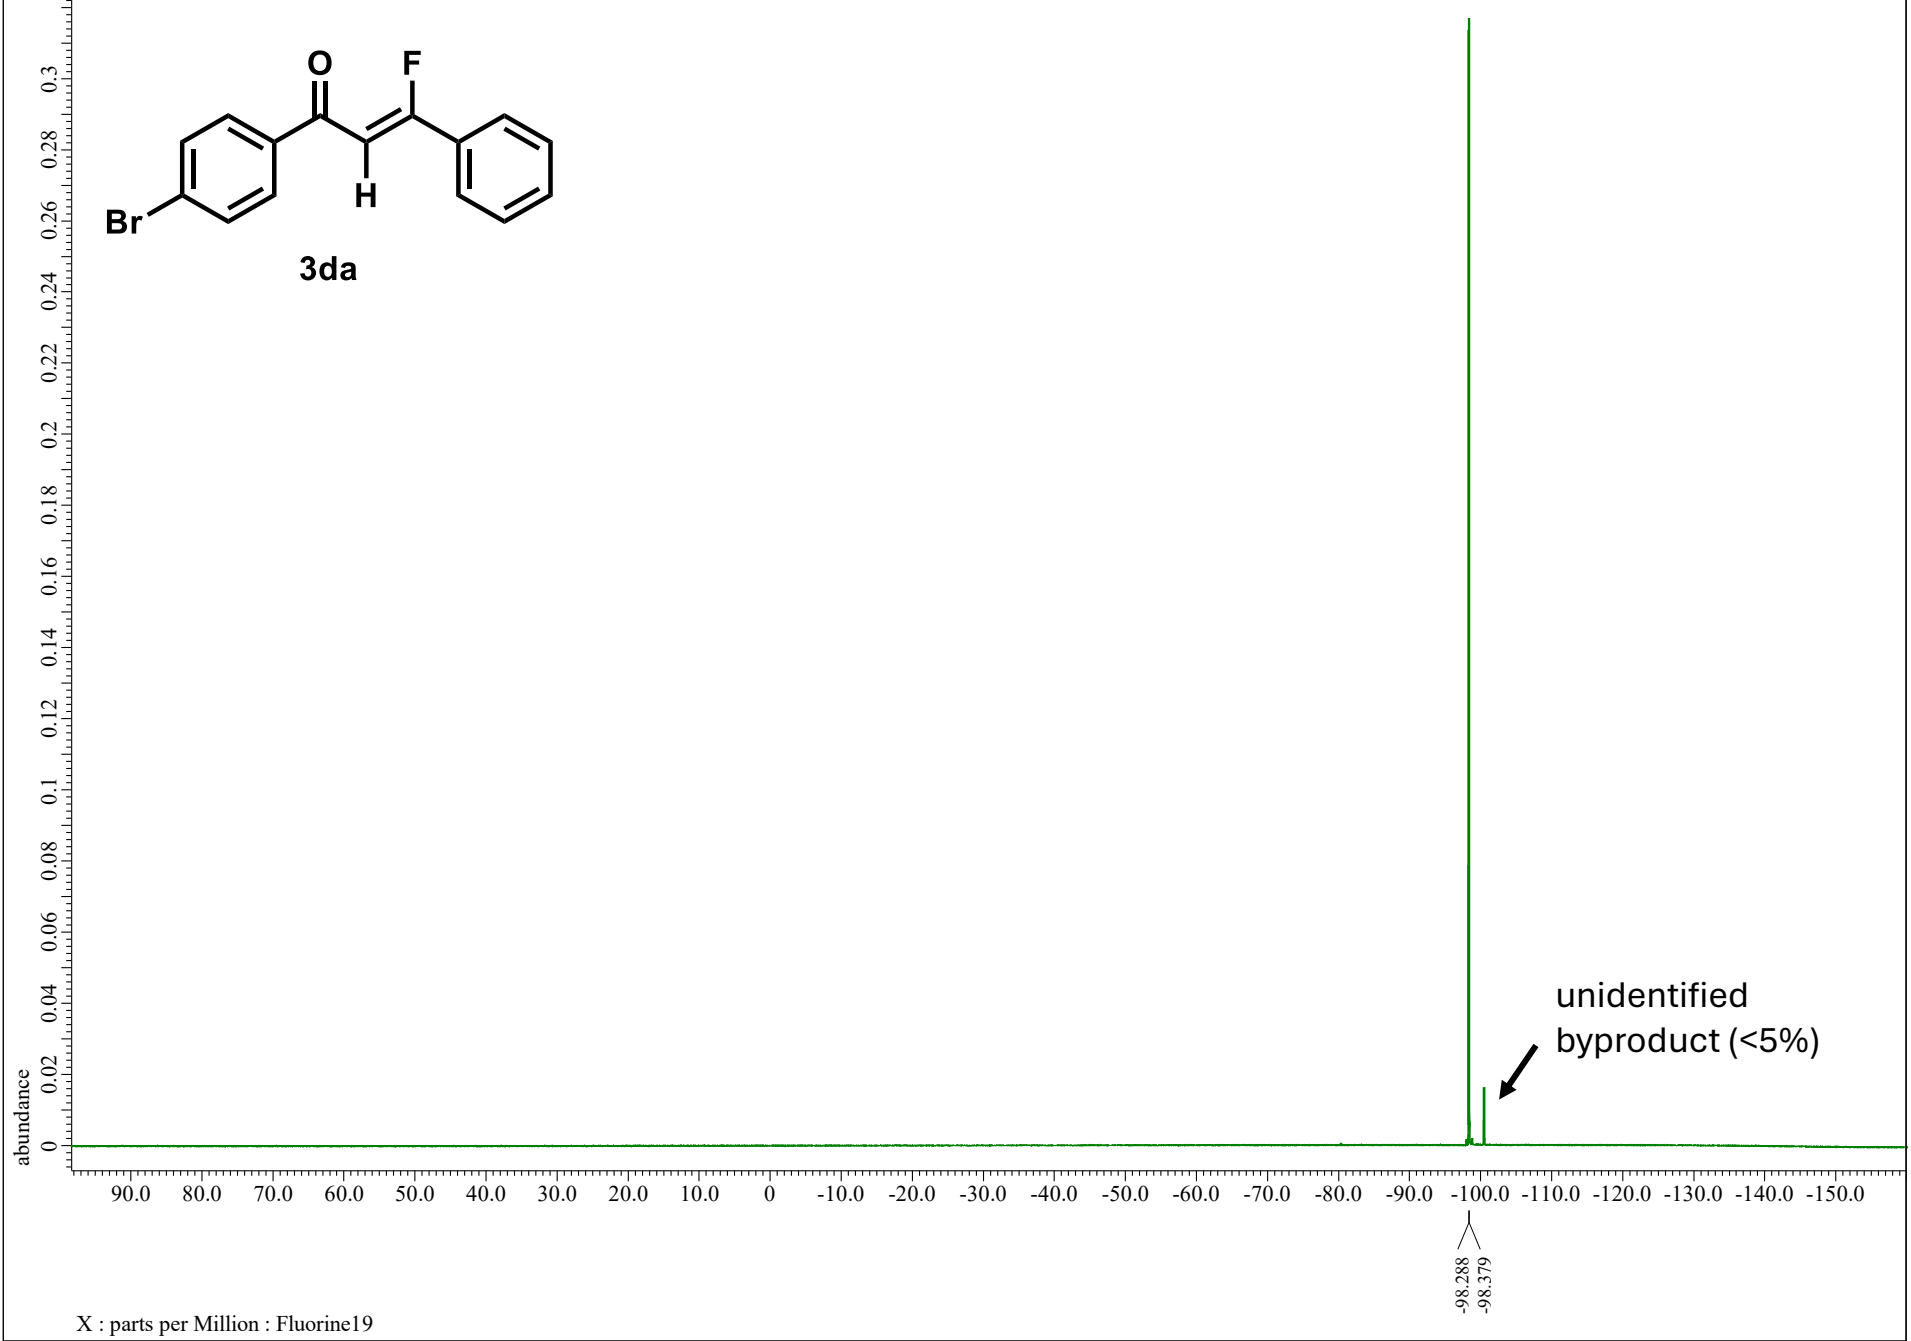

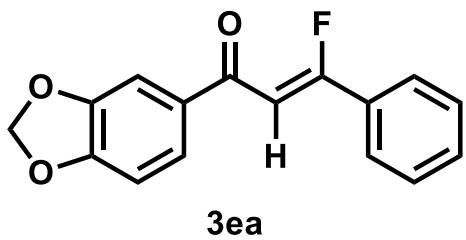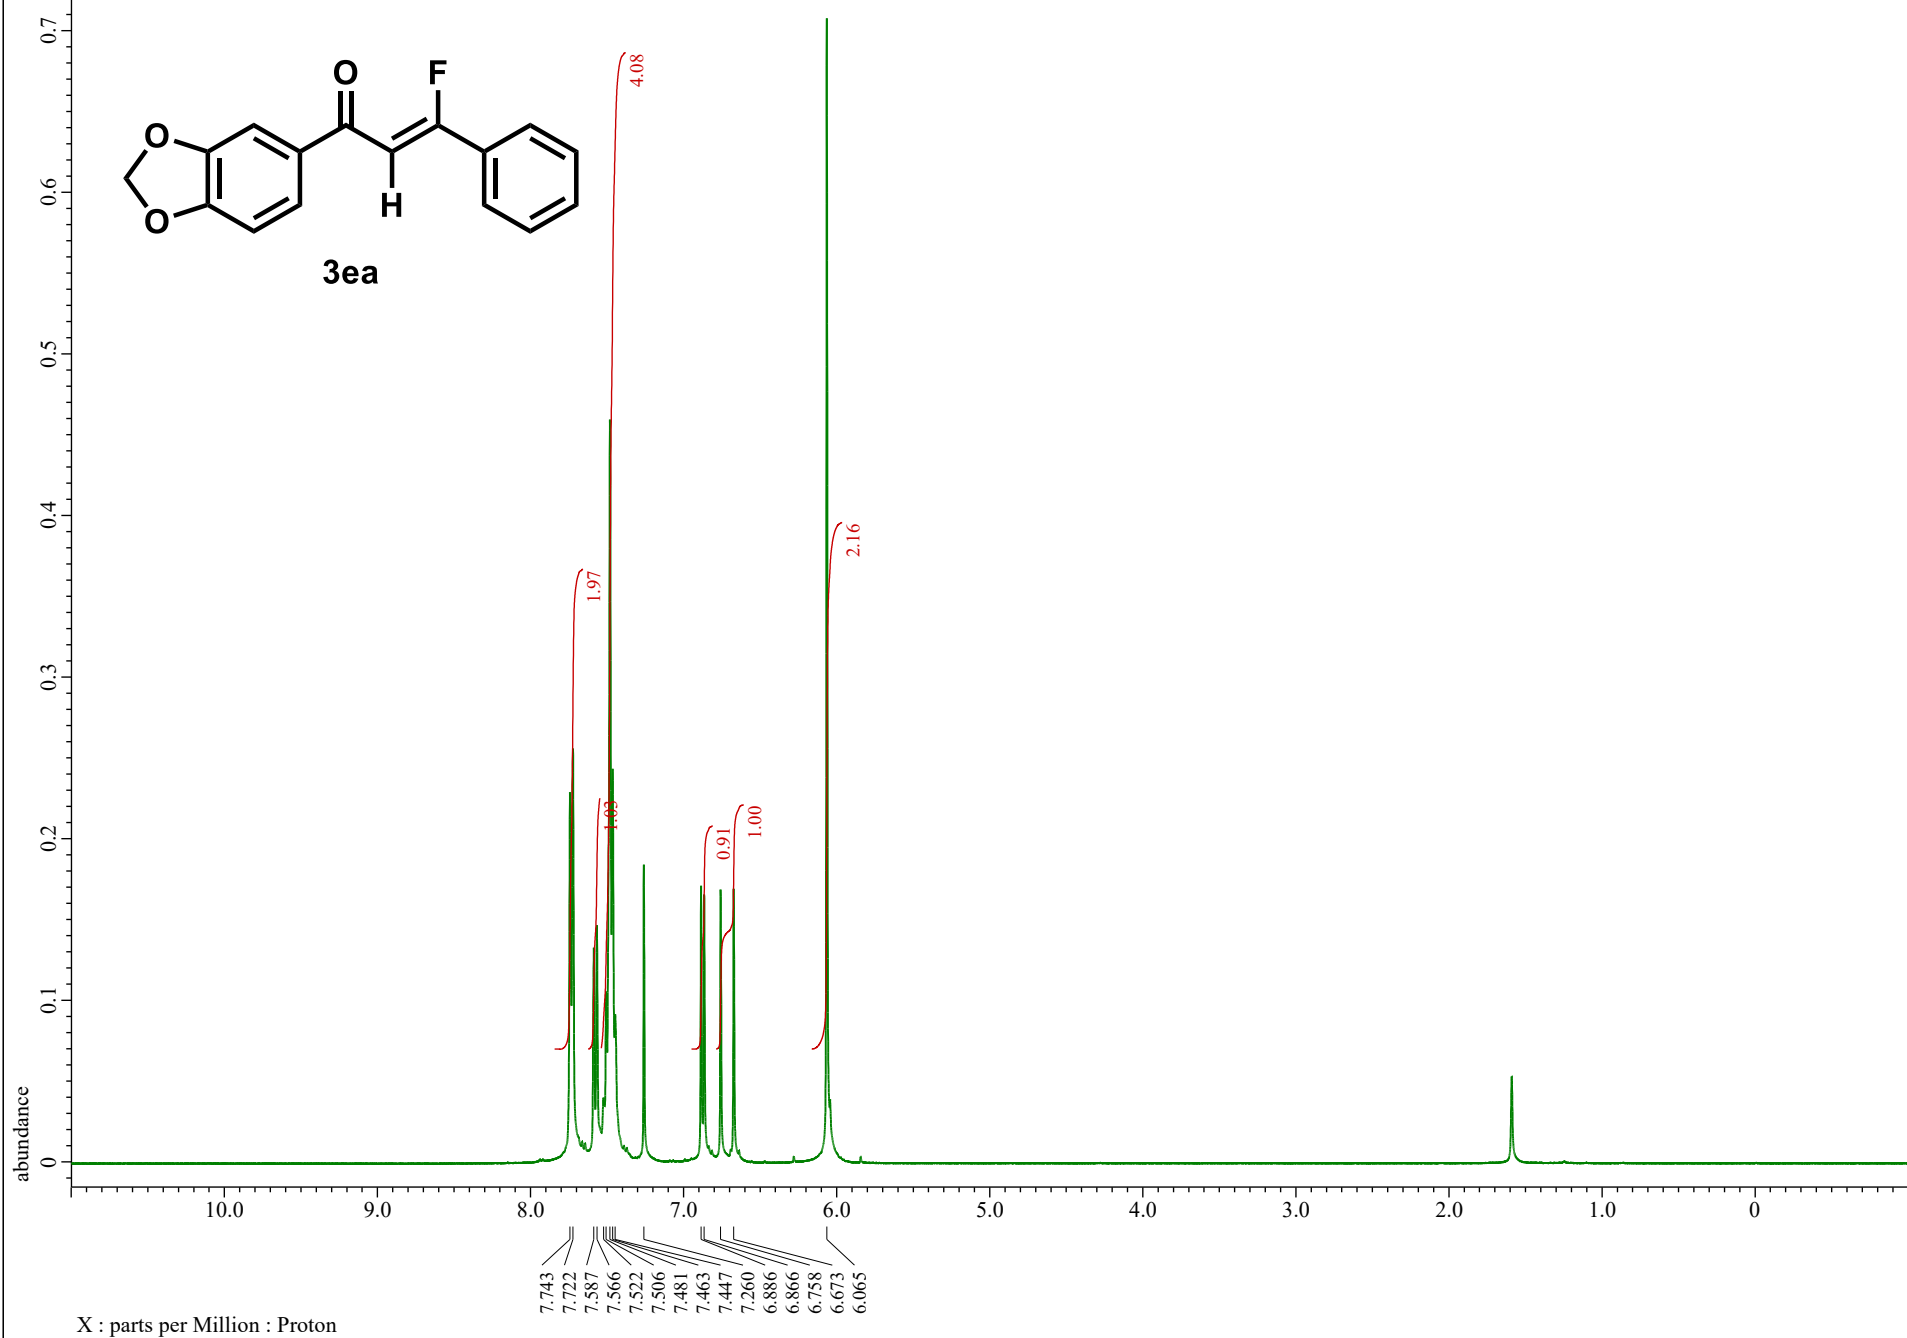

<sup>13</sup>C NMR (101 MHz, CDCl<sub>3</sub>)

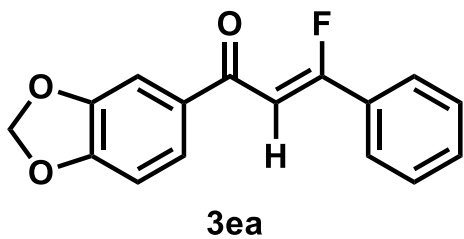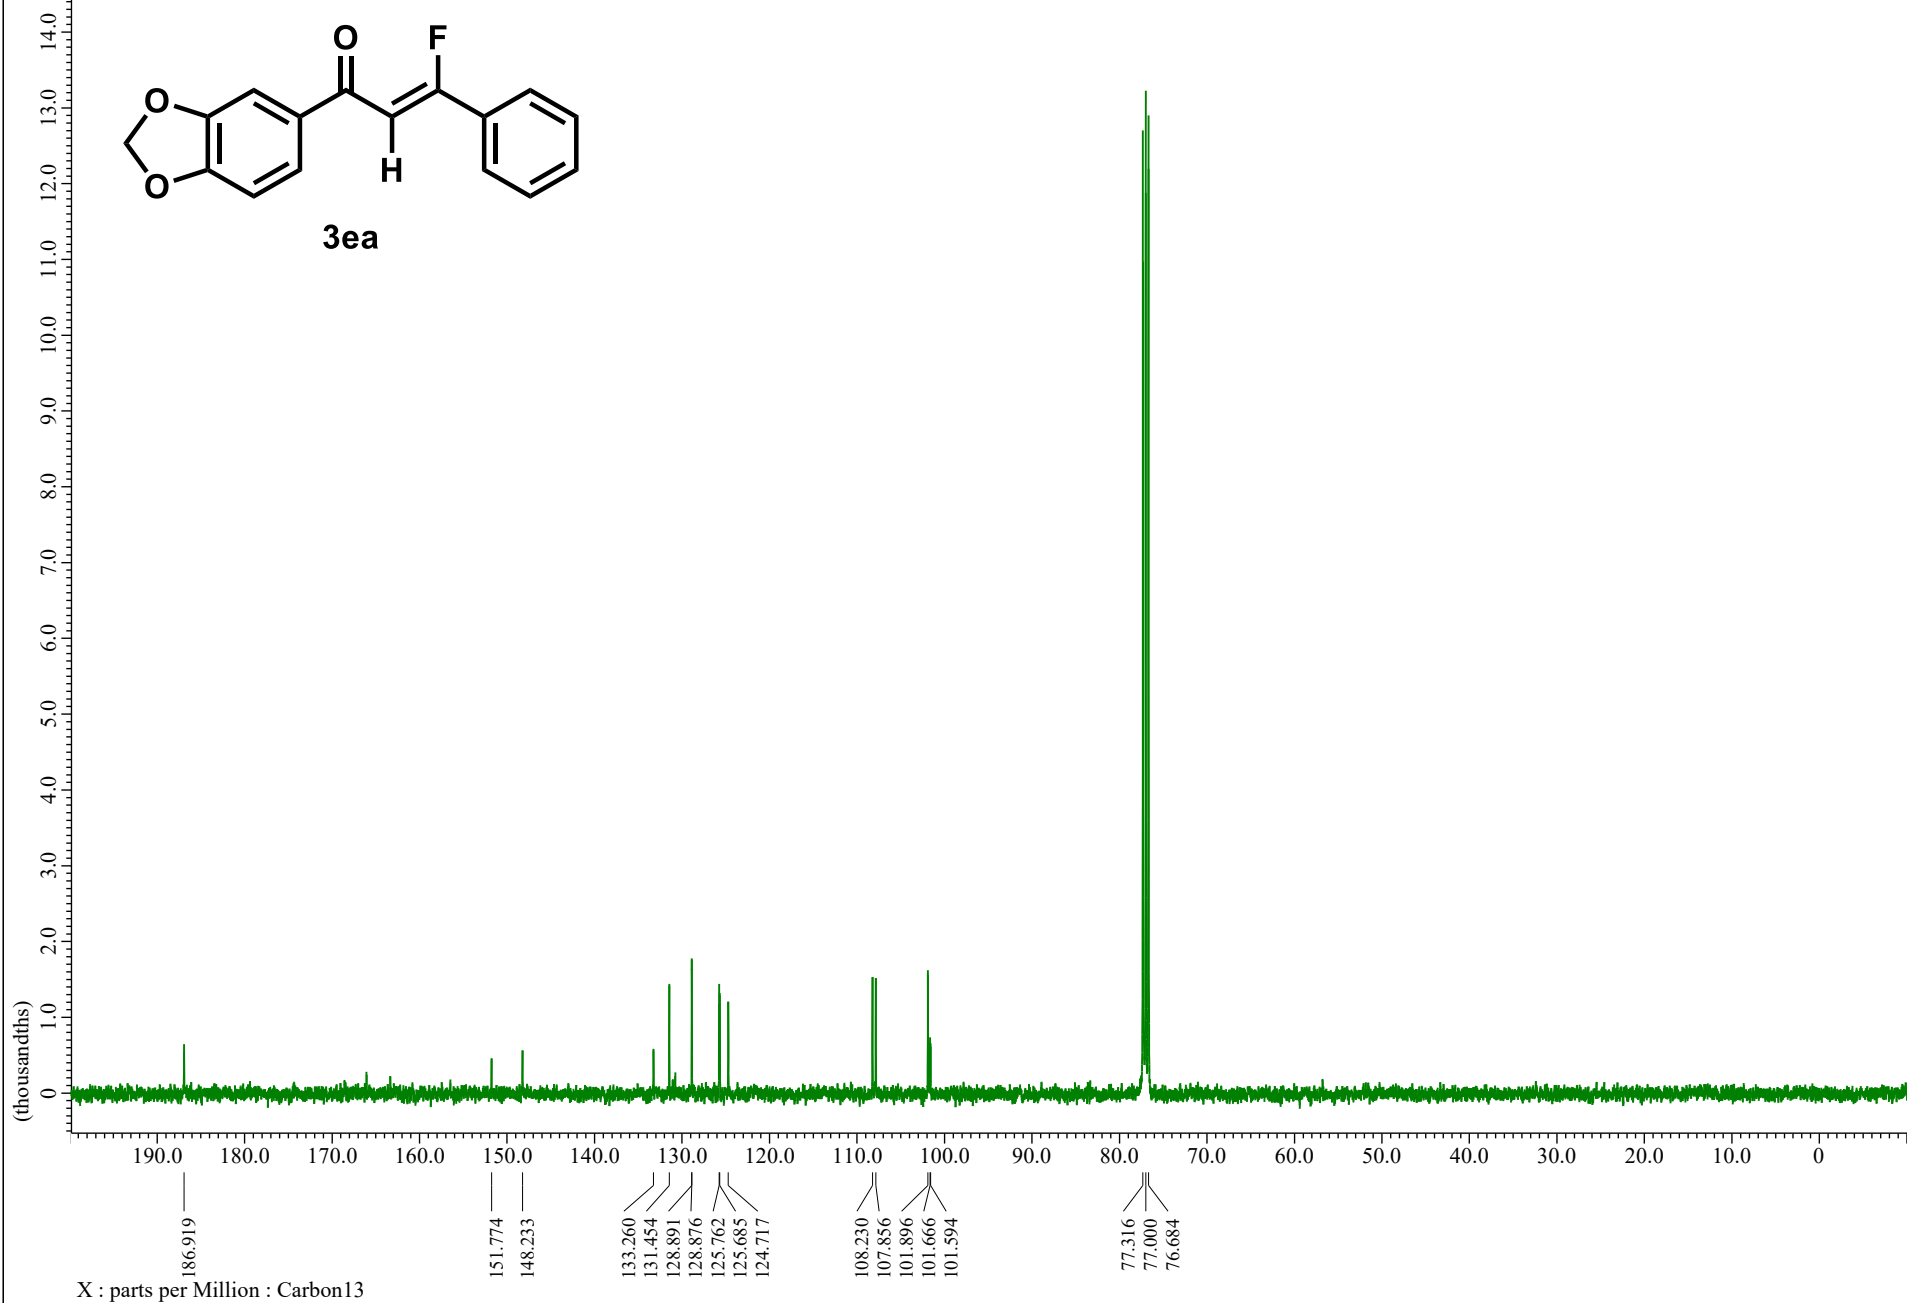

**<sup>19</sup>F NMR (376 MHz, CDCl<sub>3</sub>)**

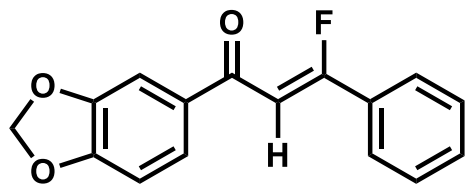

**3ea**

+ *E* isomer

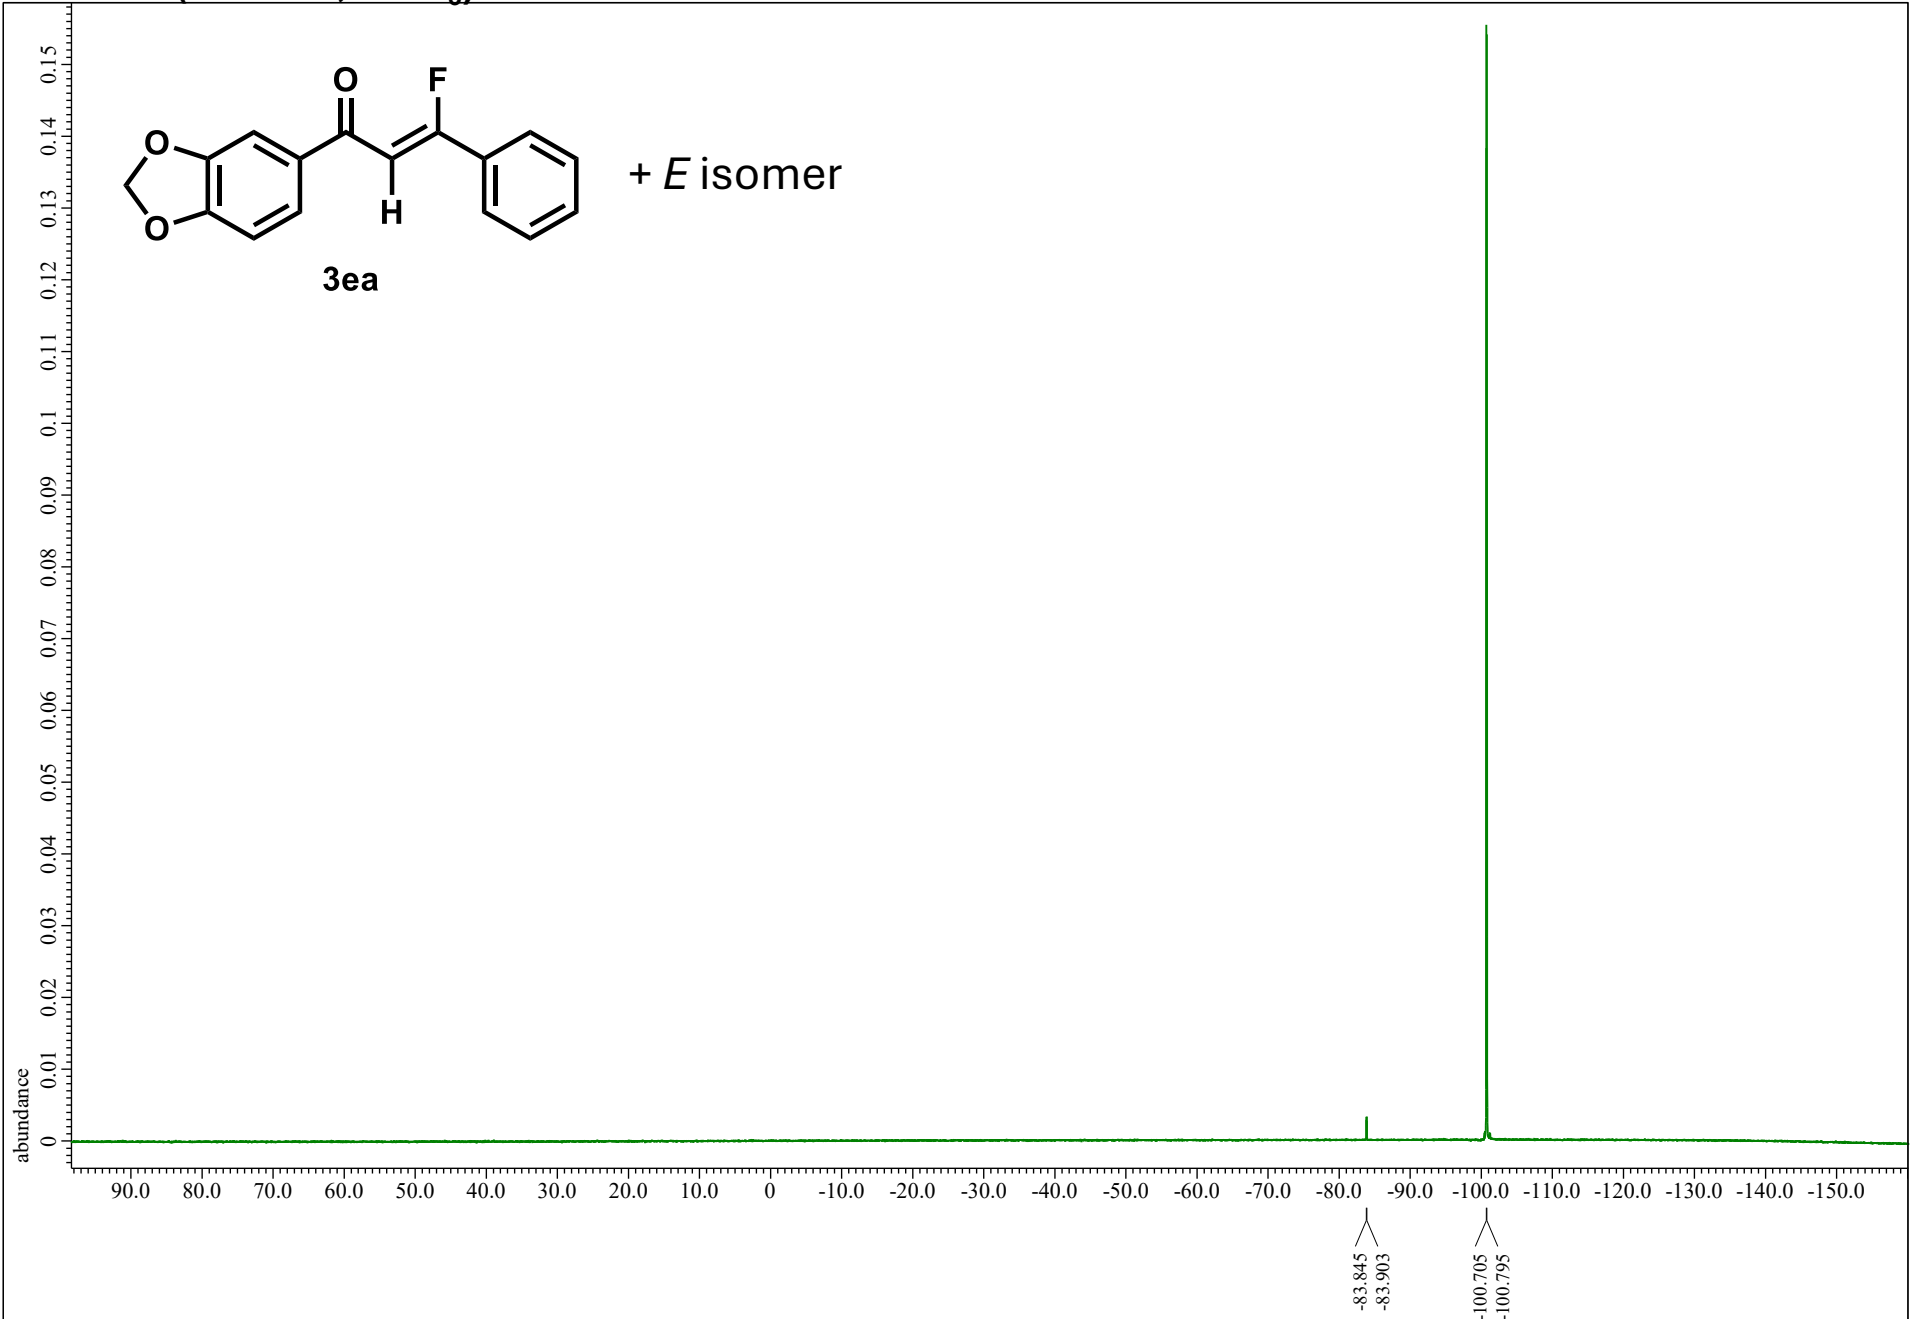

X : parts per Million : Fluorine19

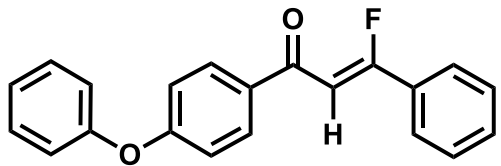

3fa

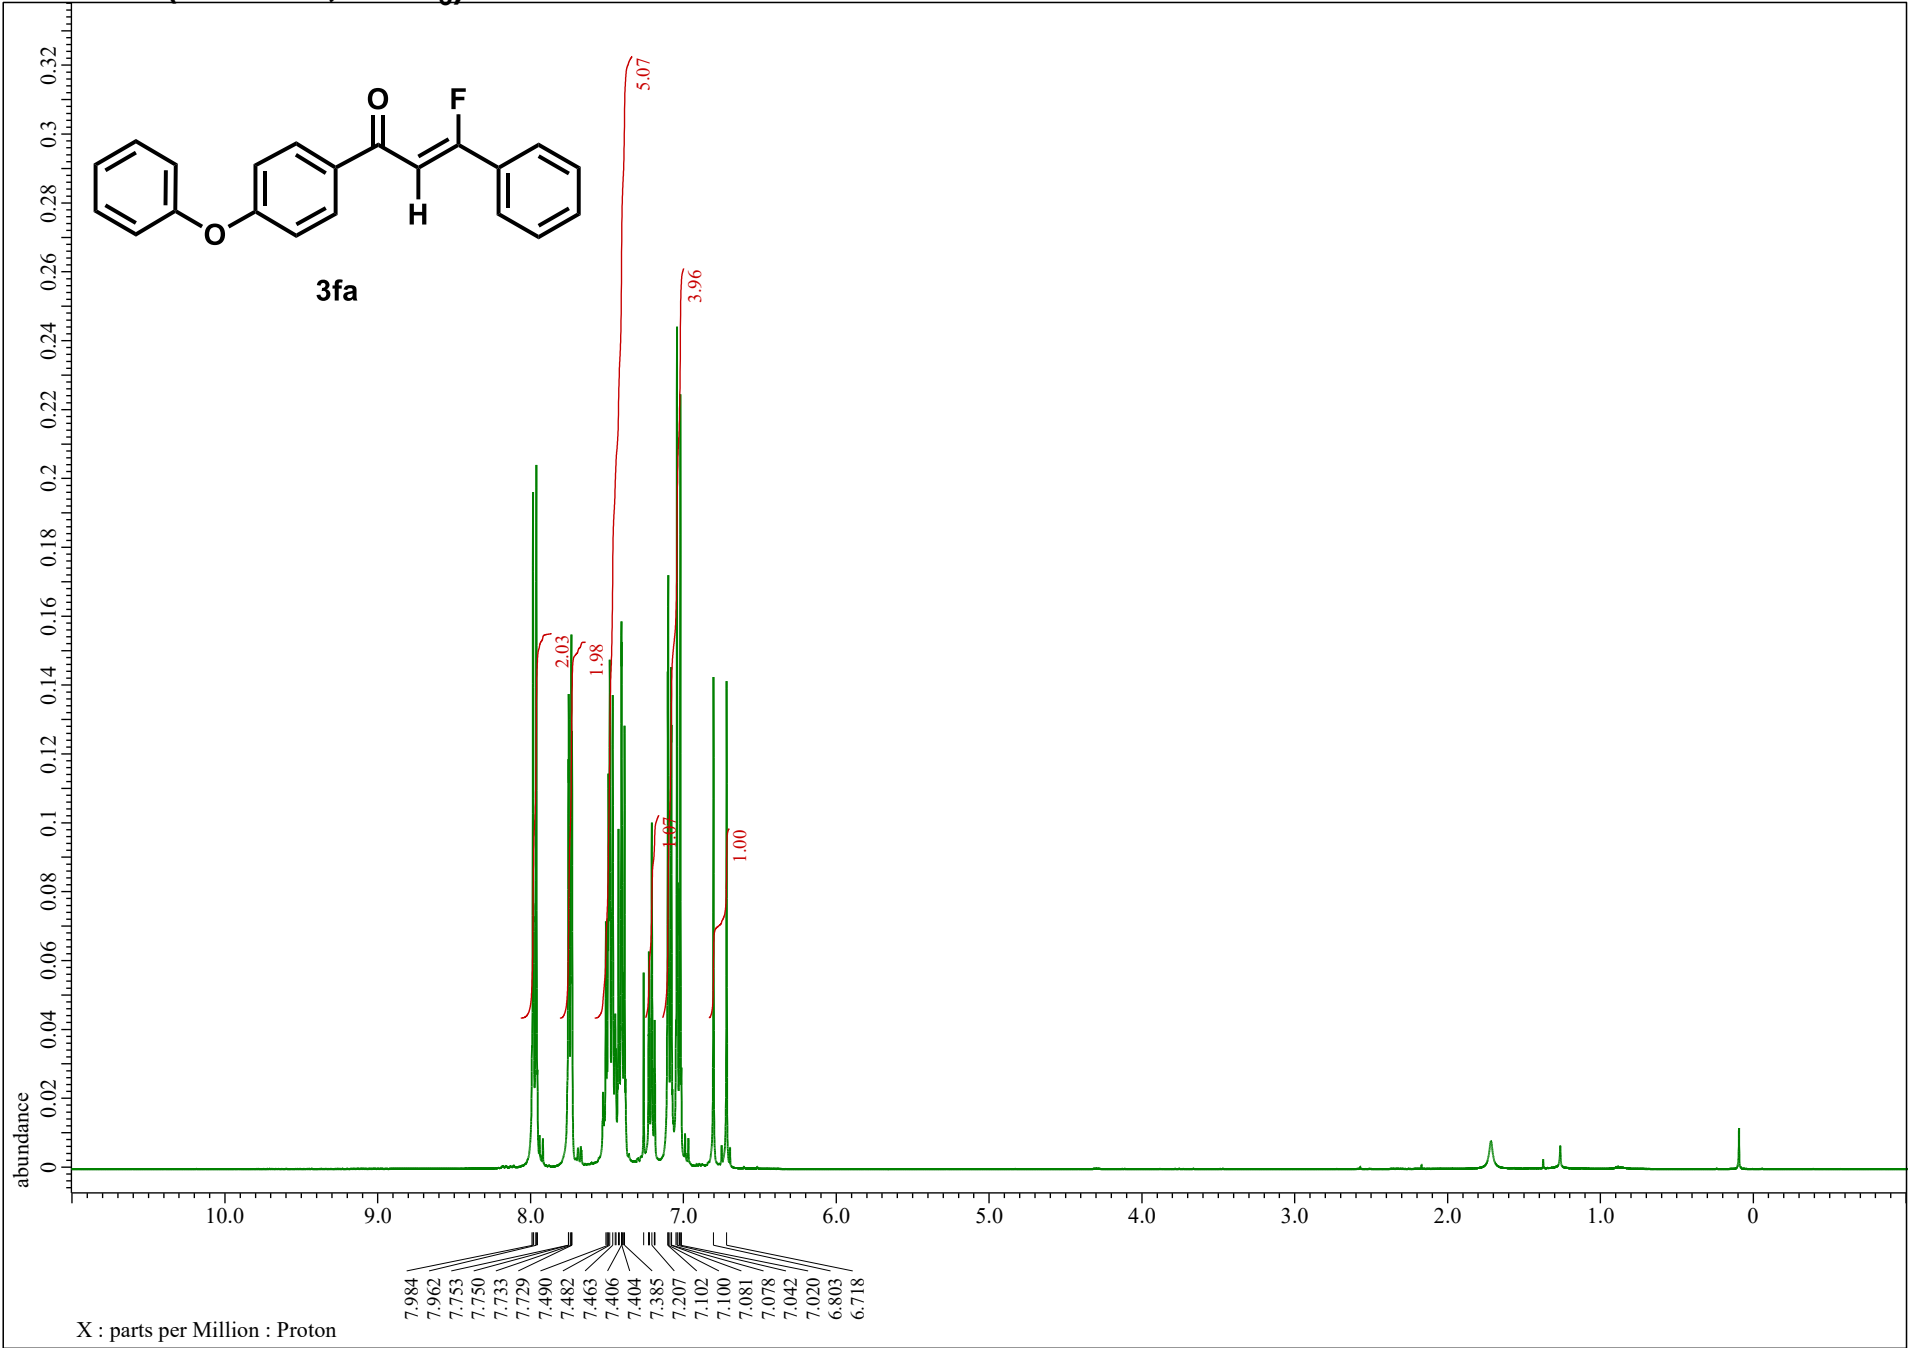

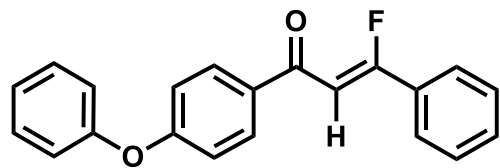

3fa

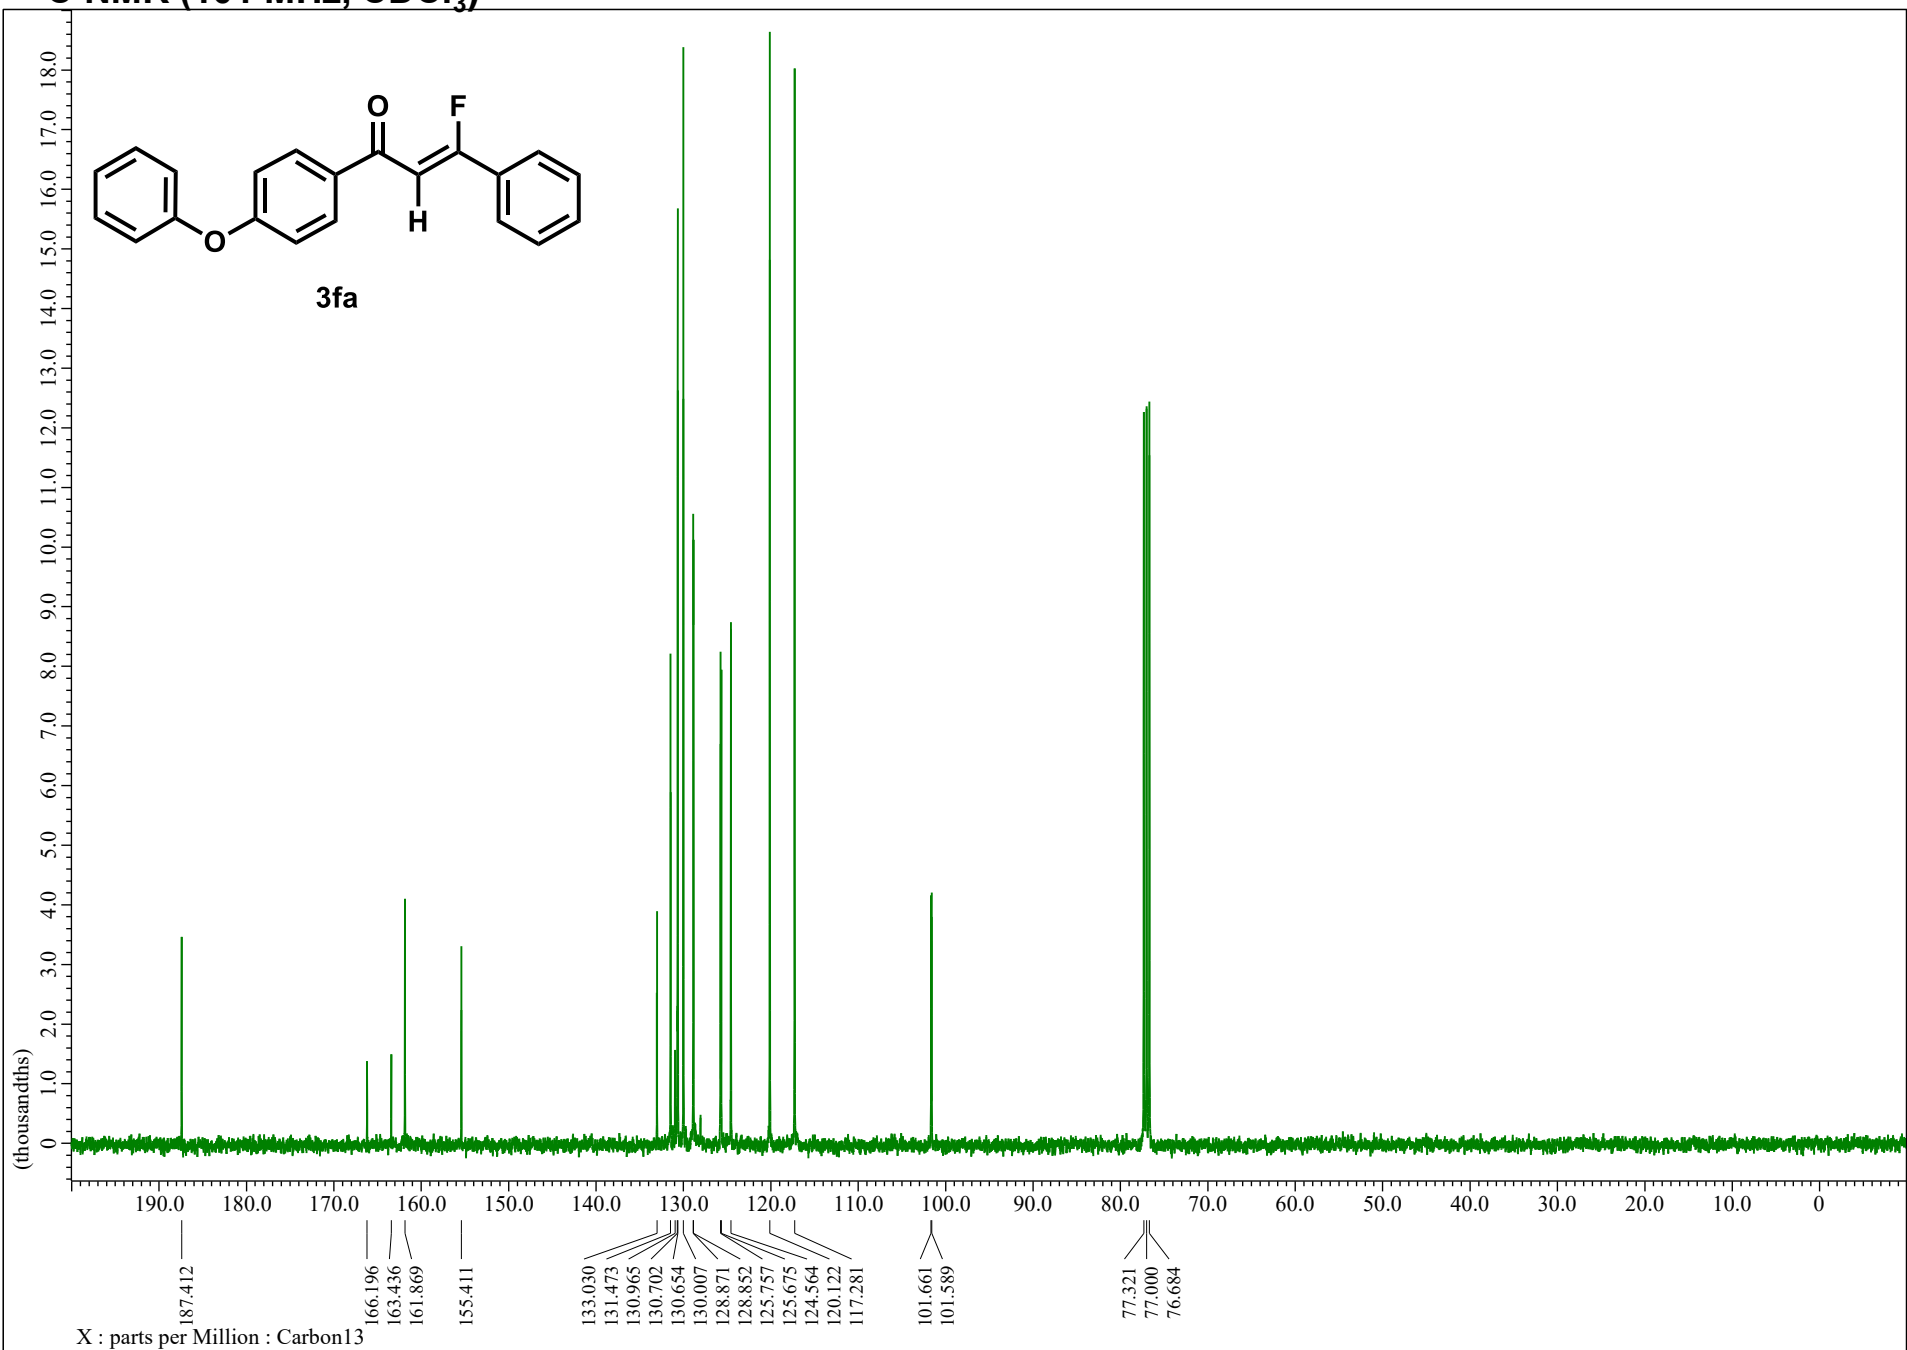

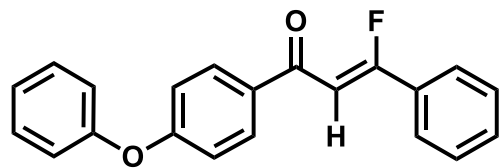

3fa

+ *E* isomer

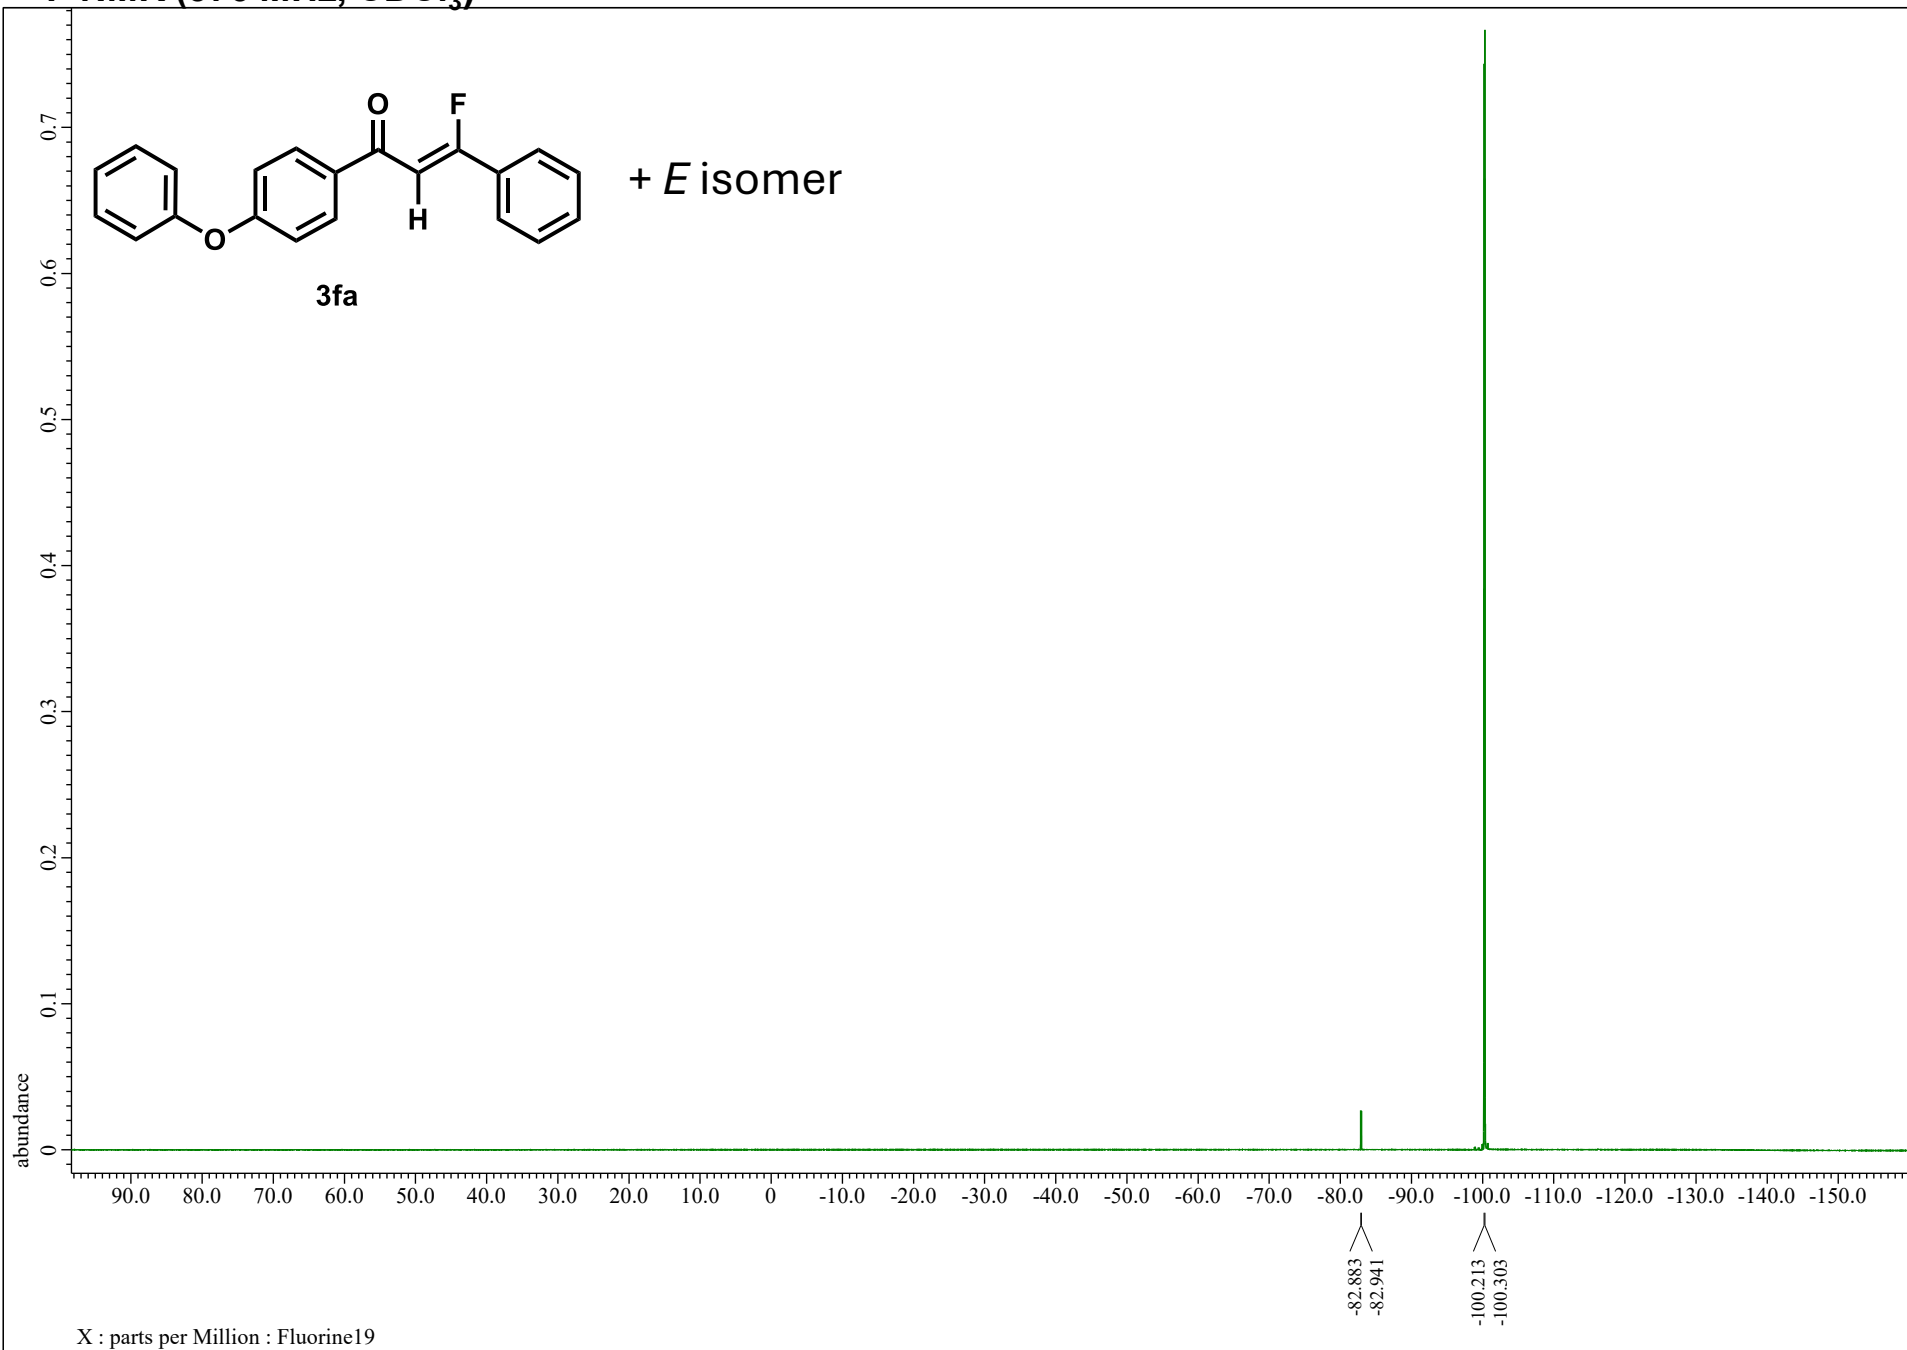

<sup>1</sup>H NMR (400 MHz, CDCl<sub>3</sub>)

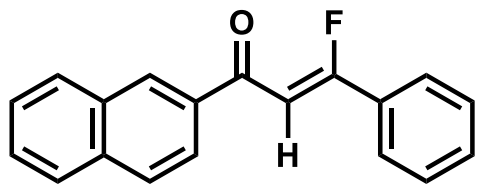

**3ga**

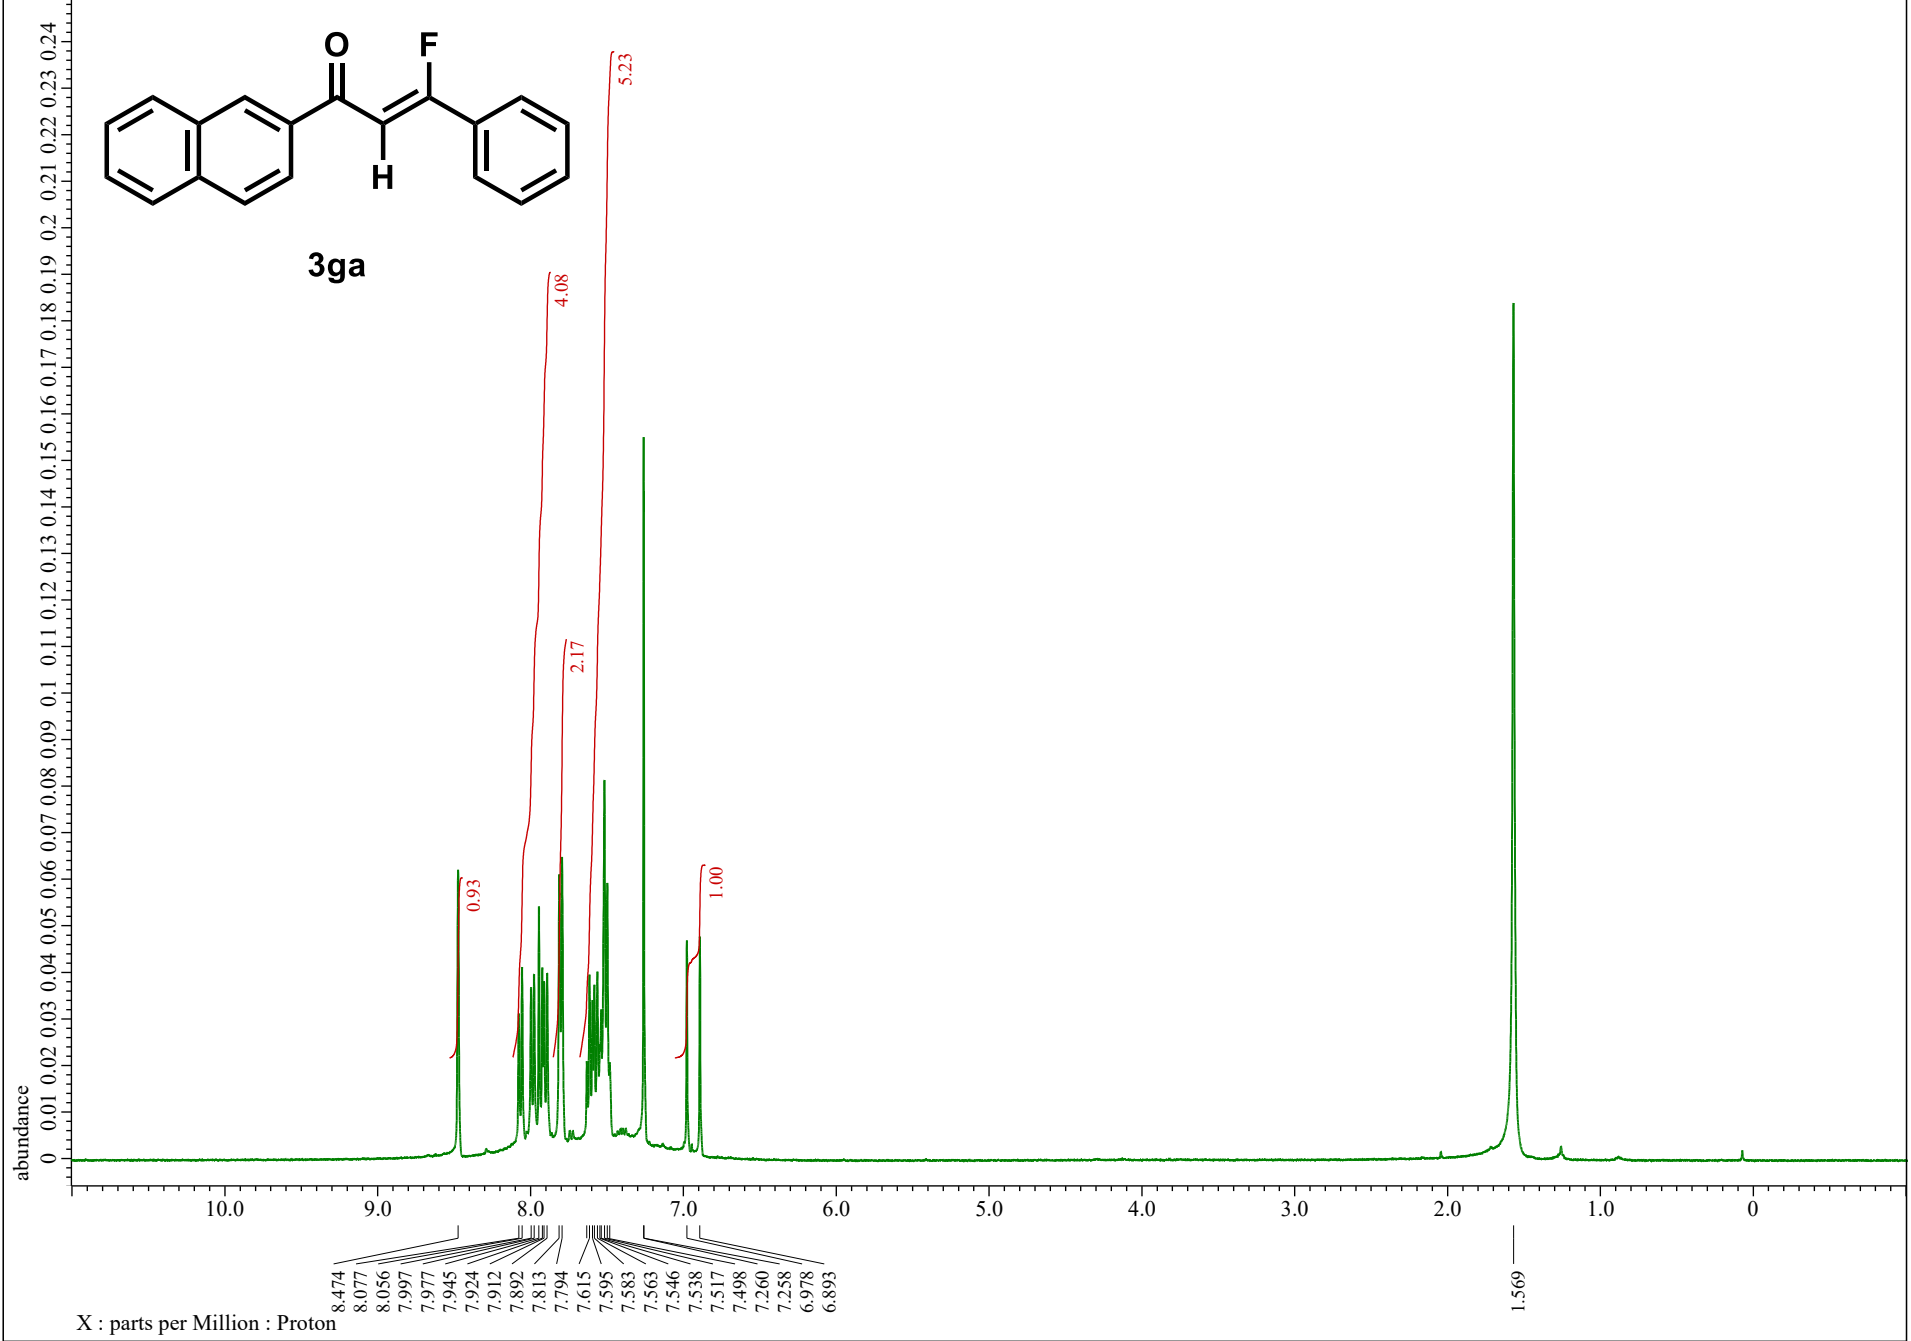



**3ga**

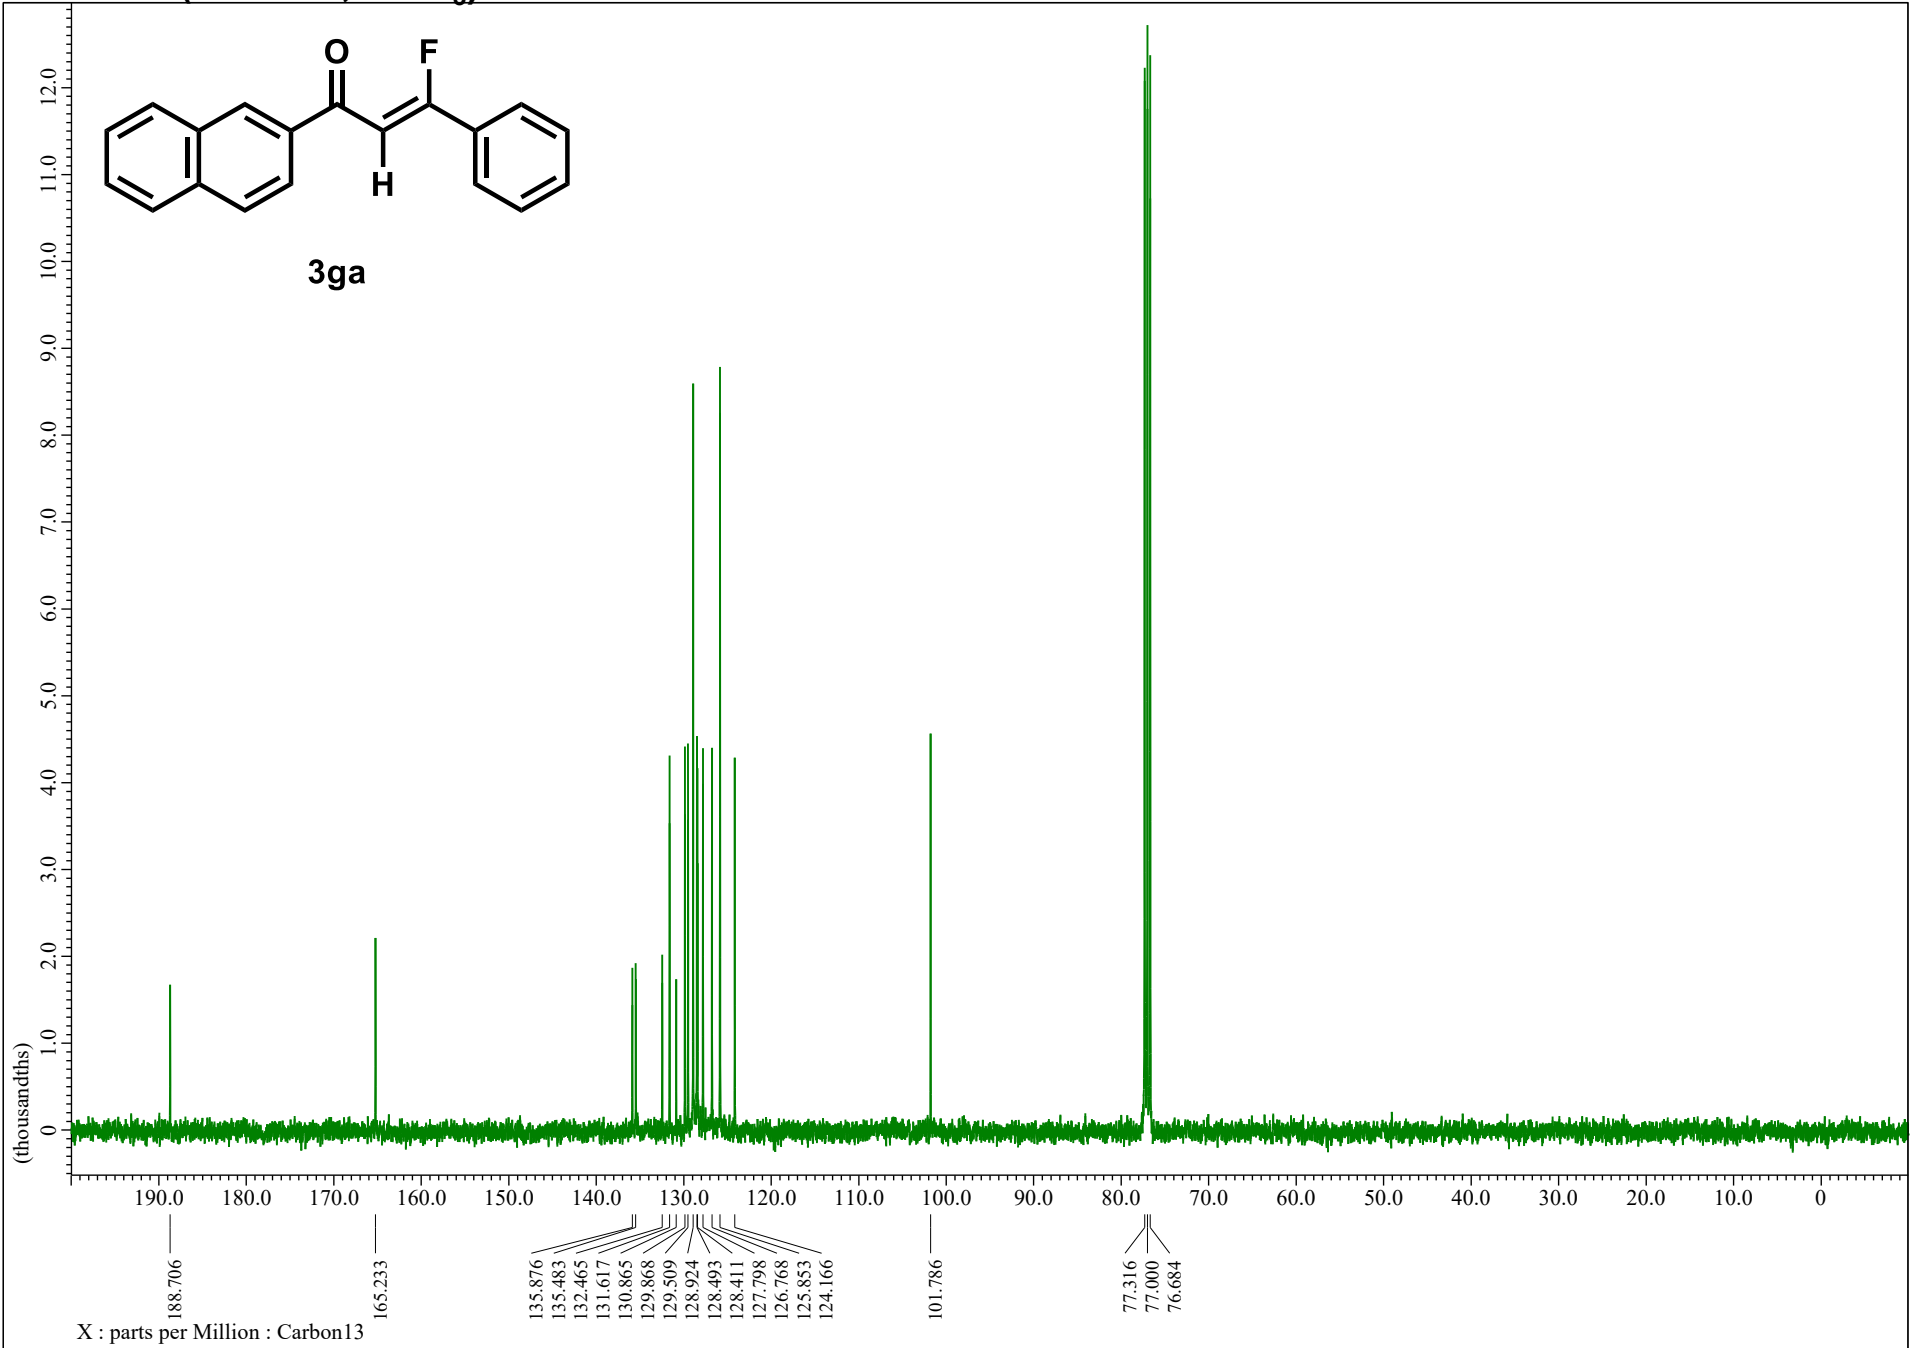

X : parts per Million : Carbon13



3ga

+ *E* isomer

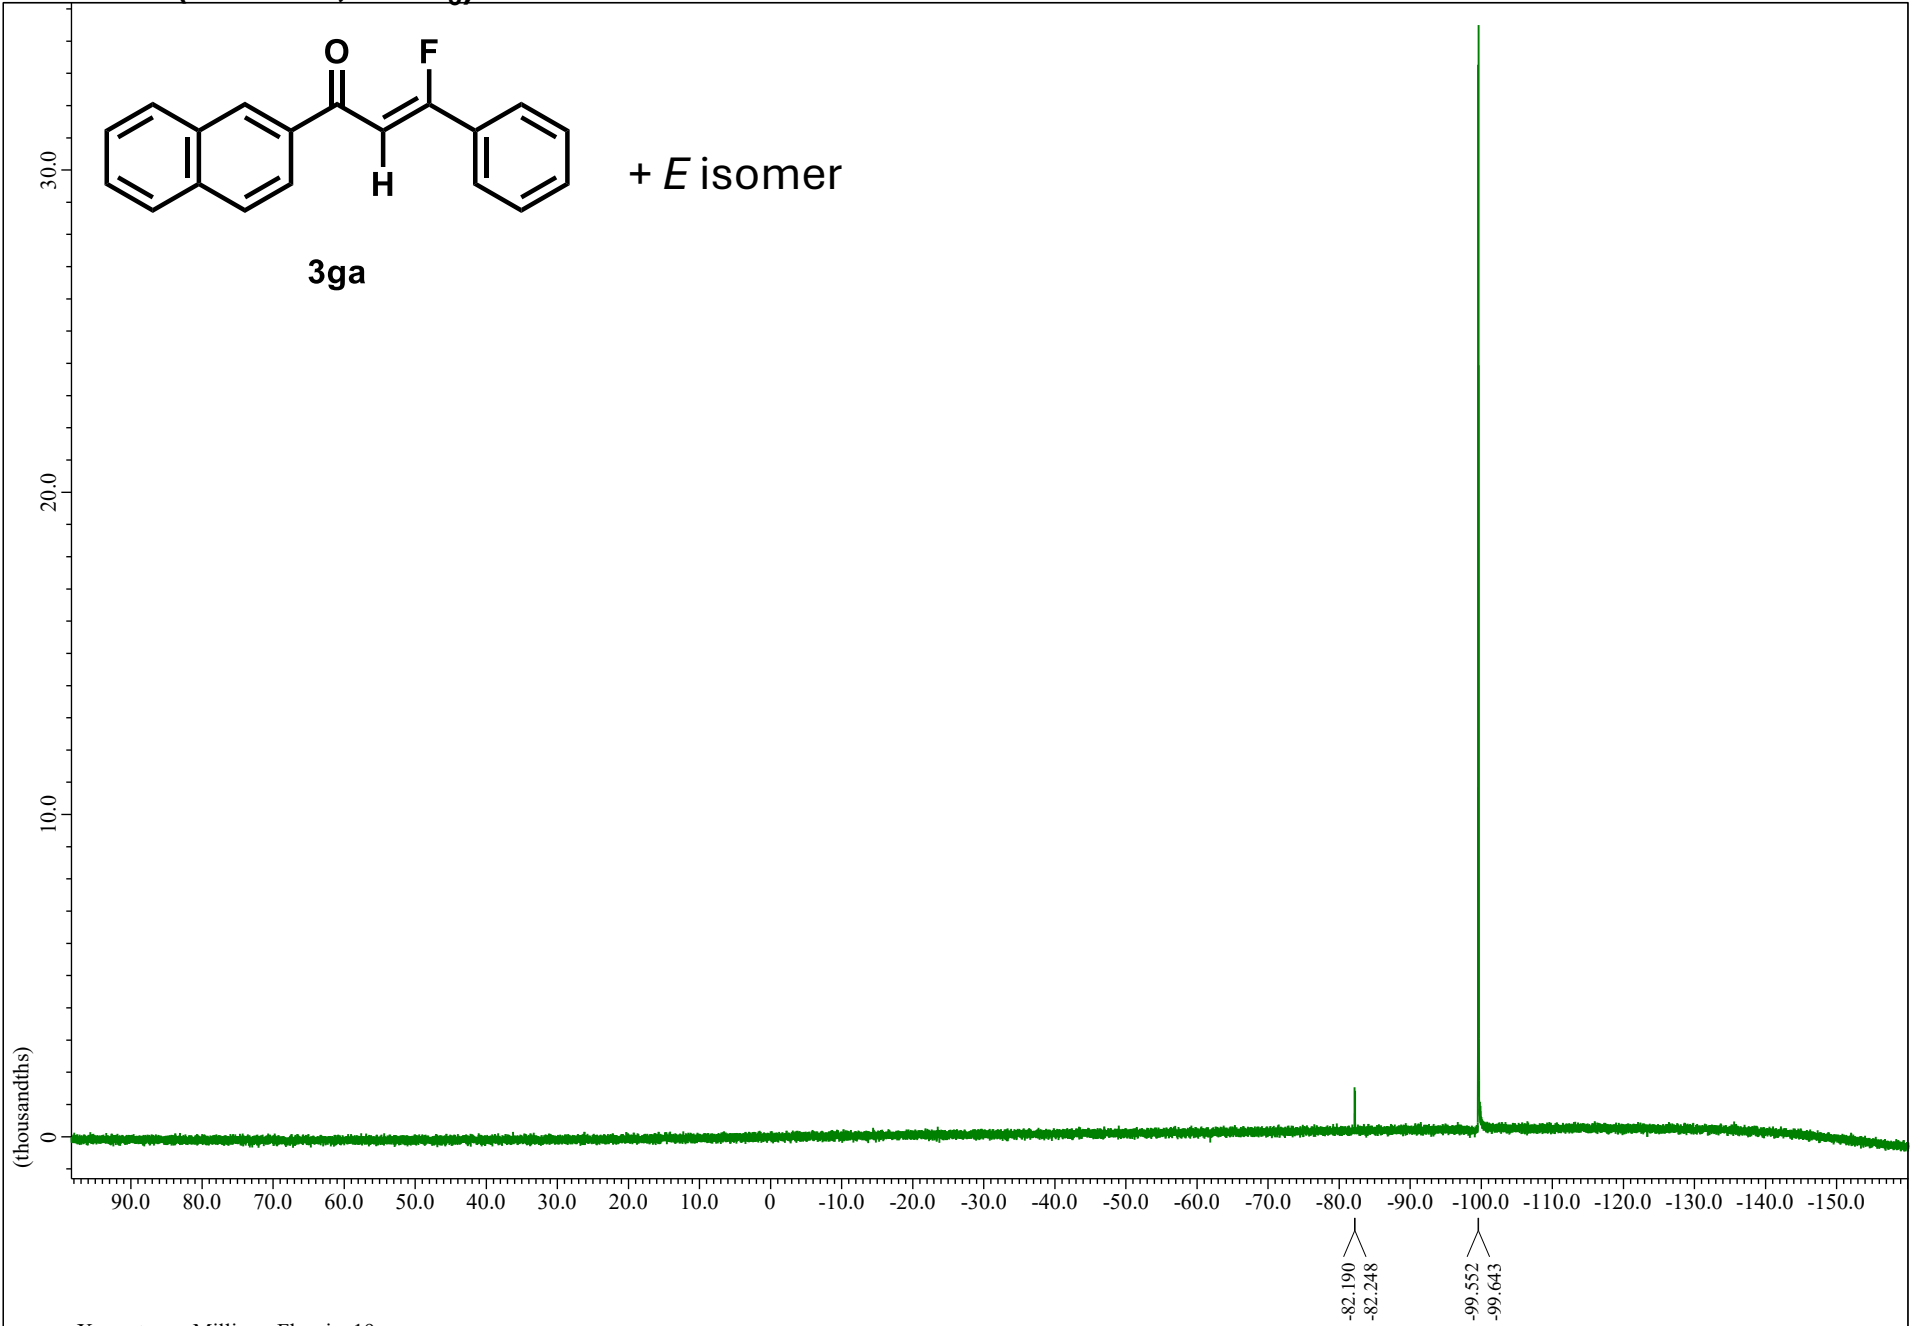

X : parts per Million : Fluorine19

**<sup>1</sup>H NMR (400 MHz, CDCl<sub>3</sub>)**

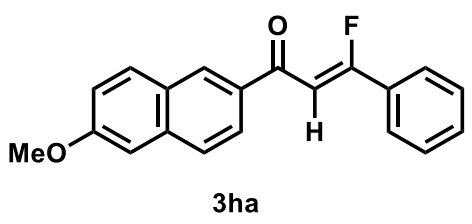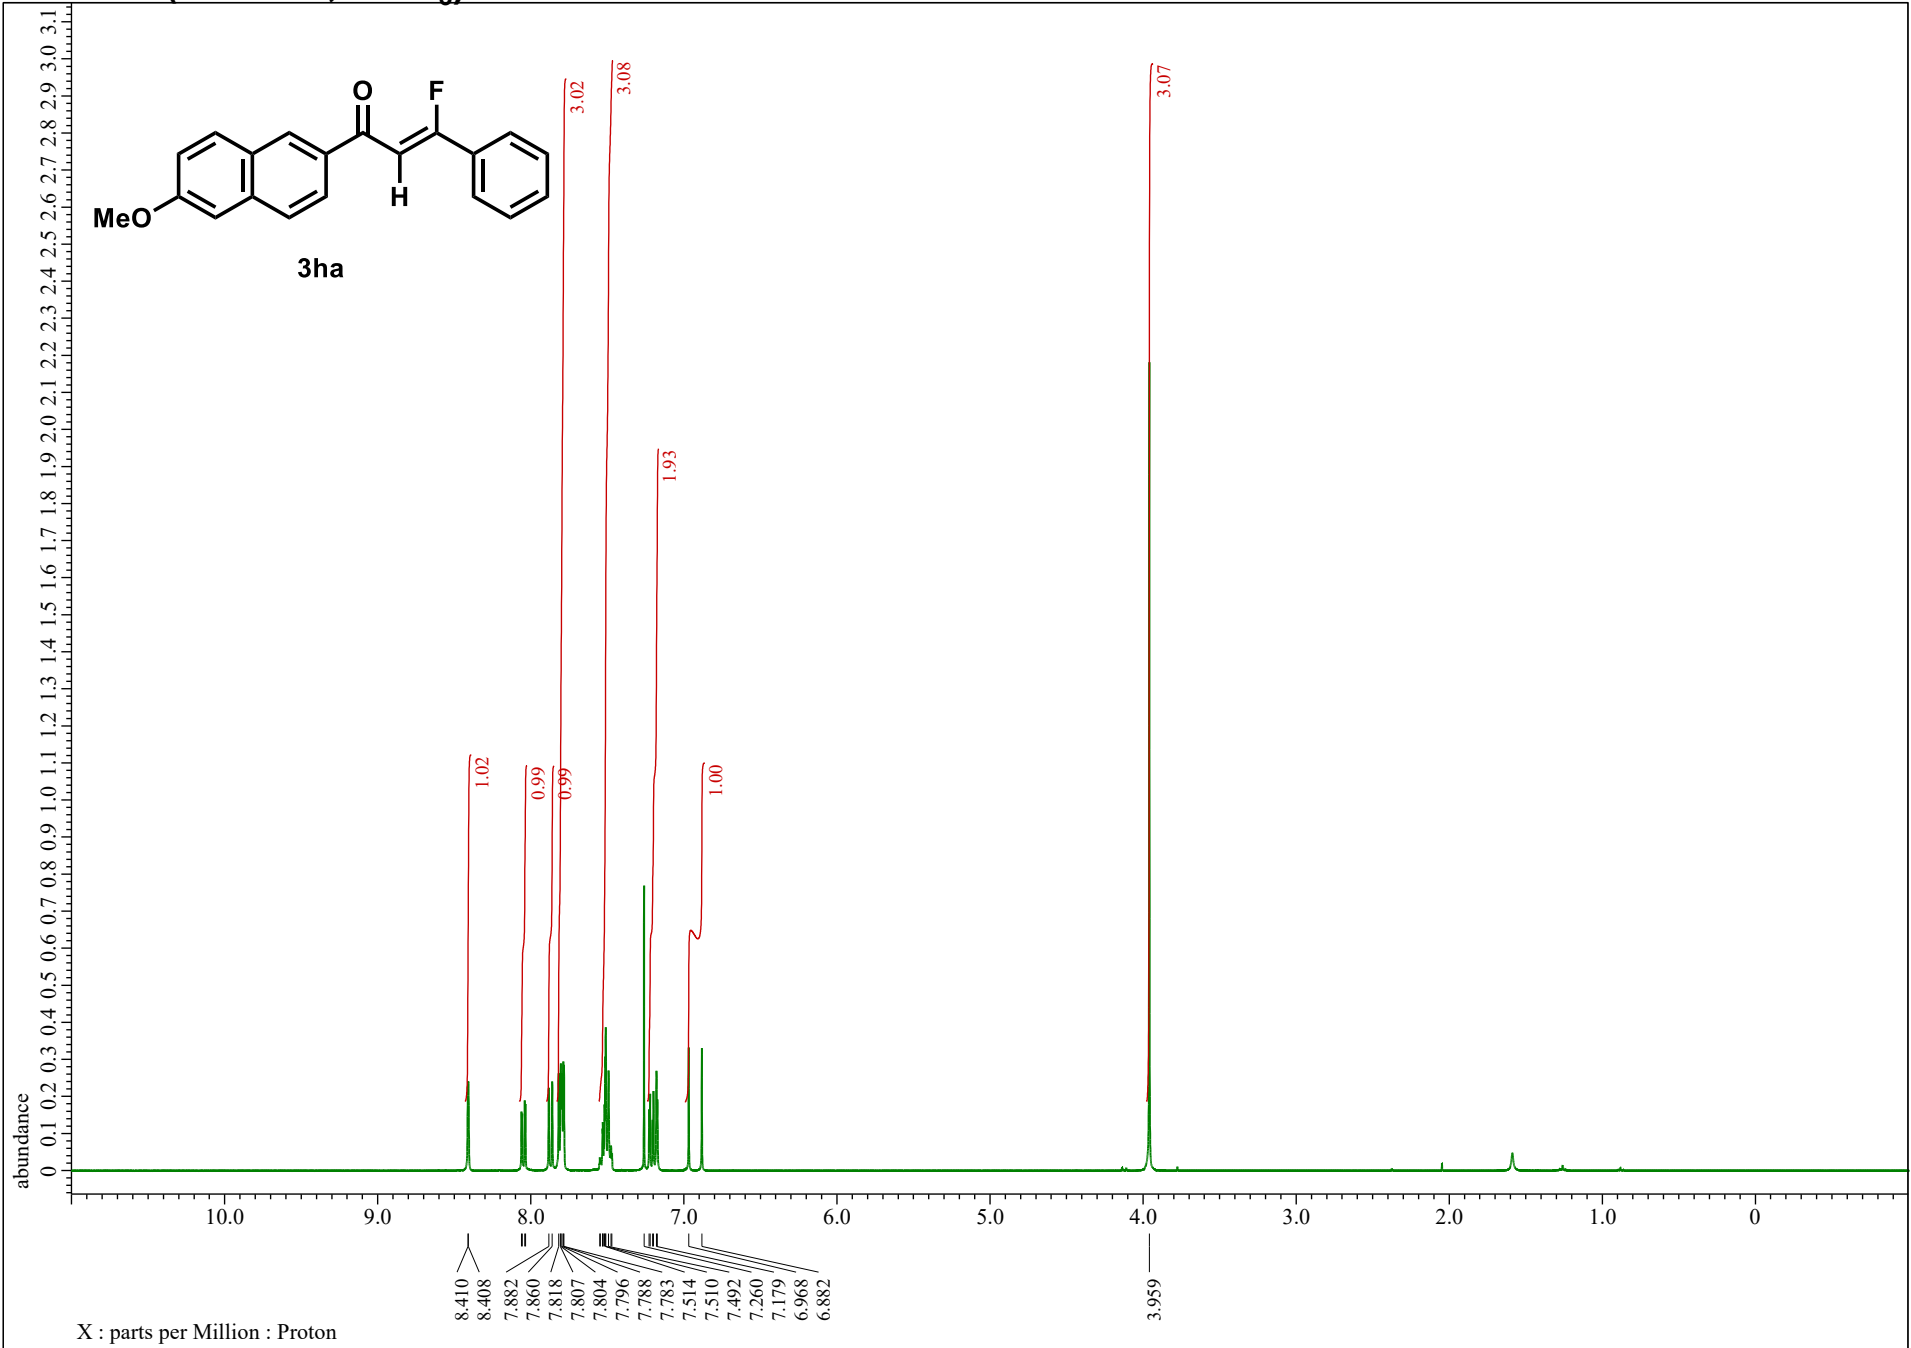

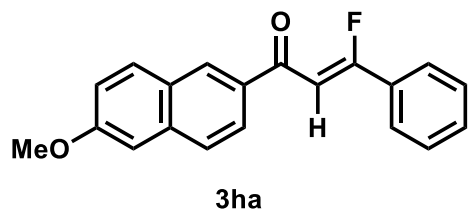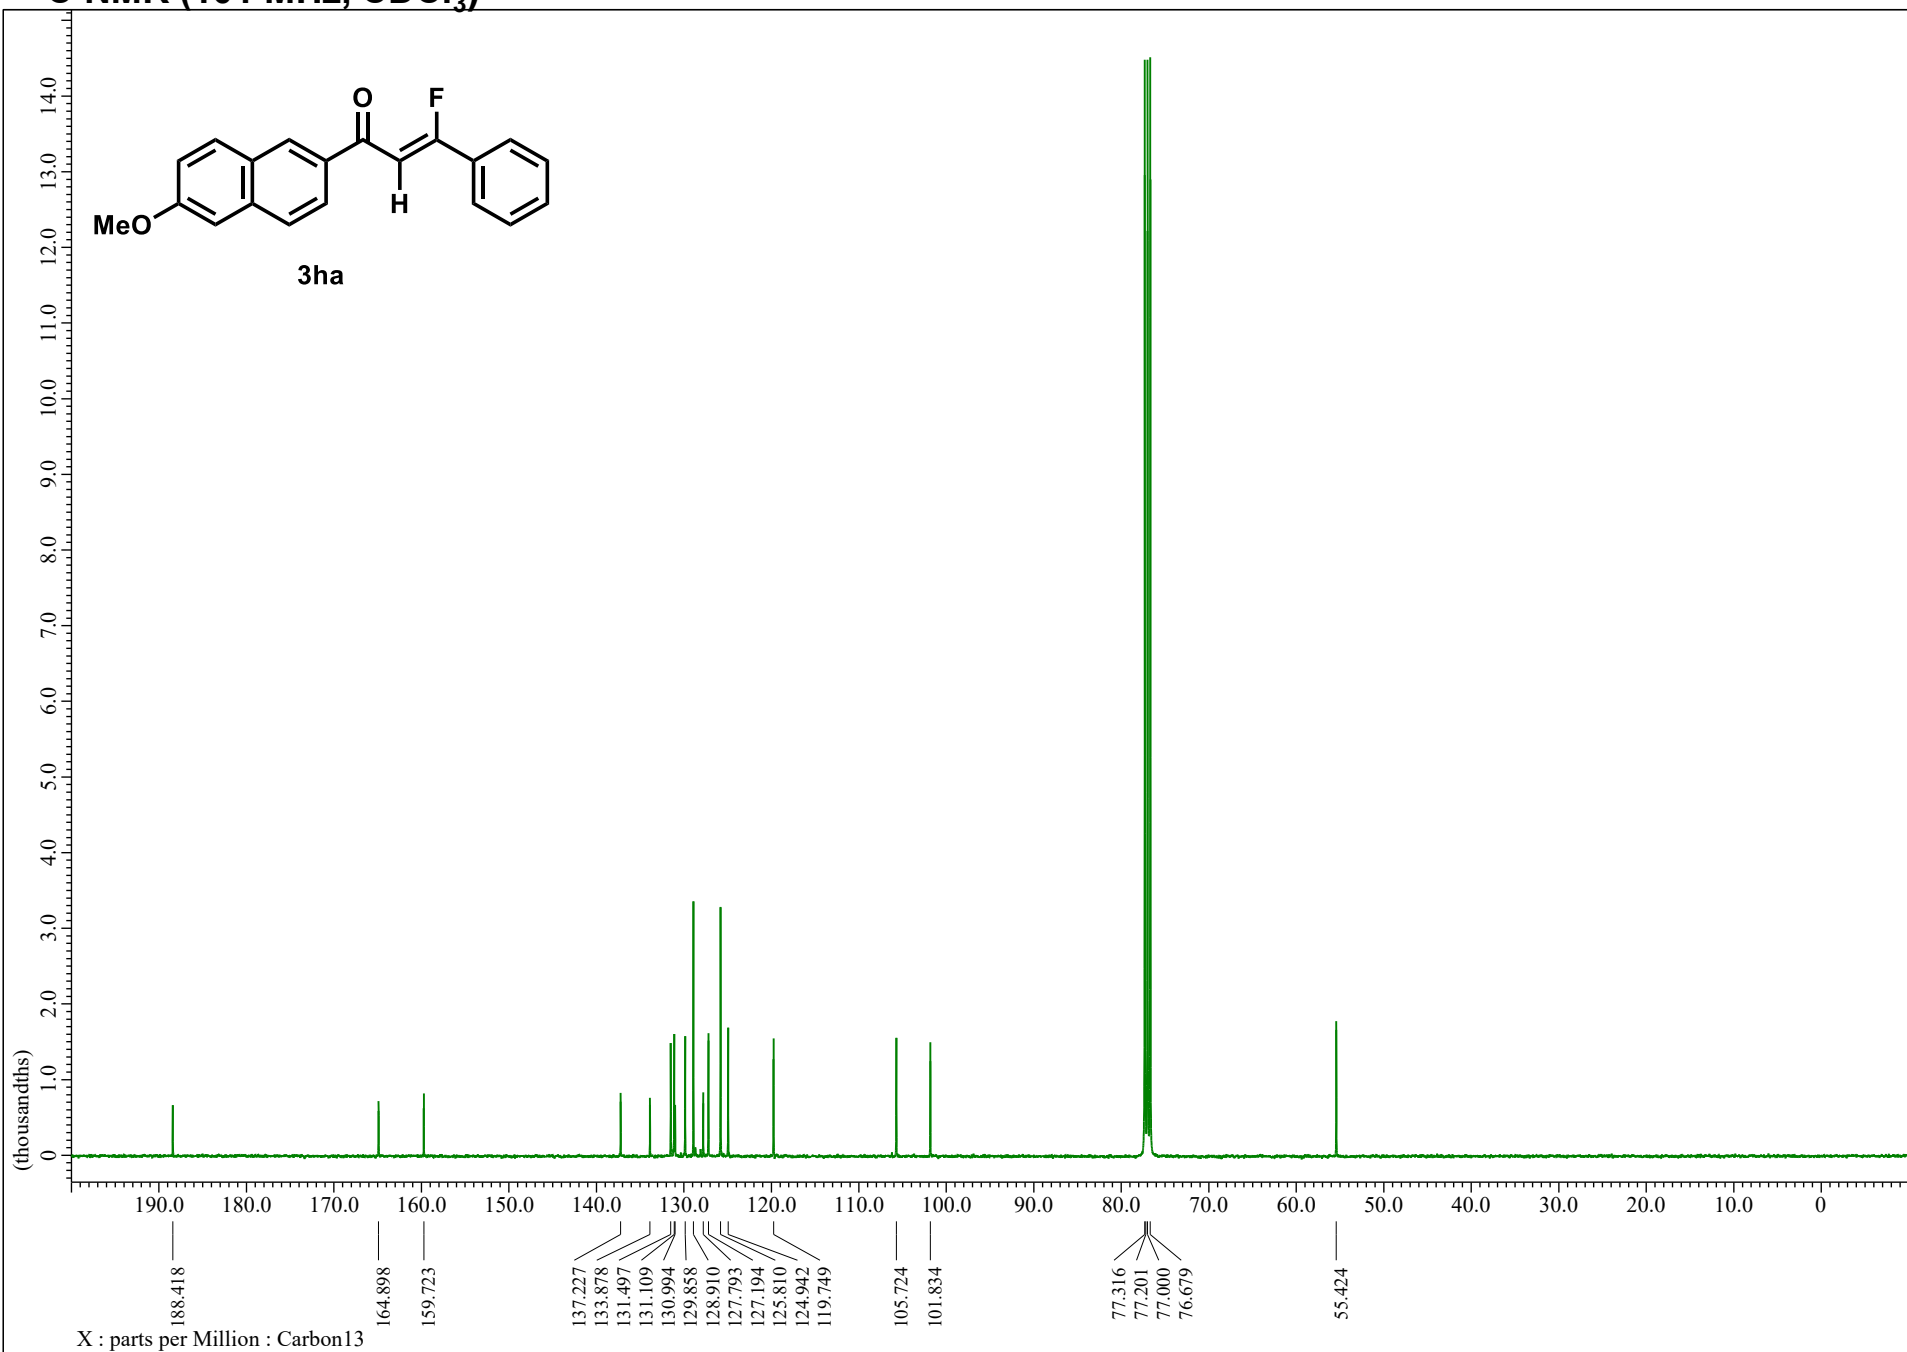

**<sup>19</sup>F NMR (376 MHz, CDCl<sub>3</sub>)**

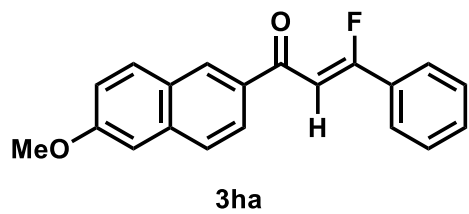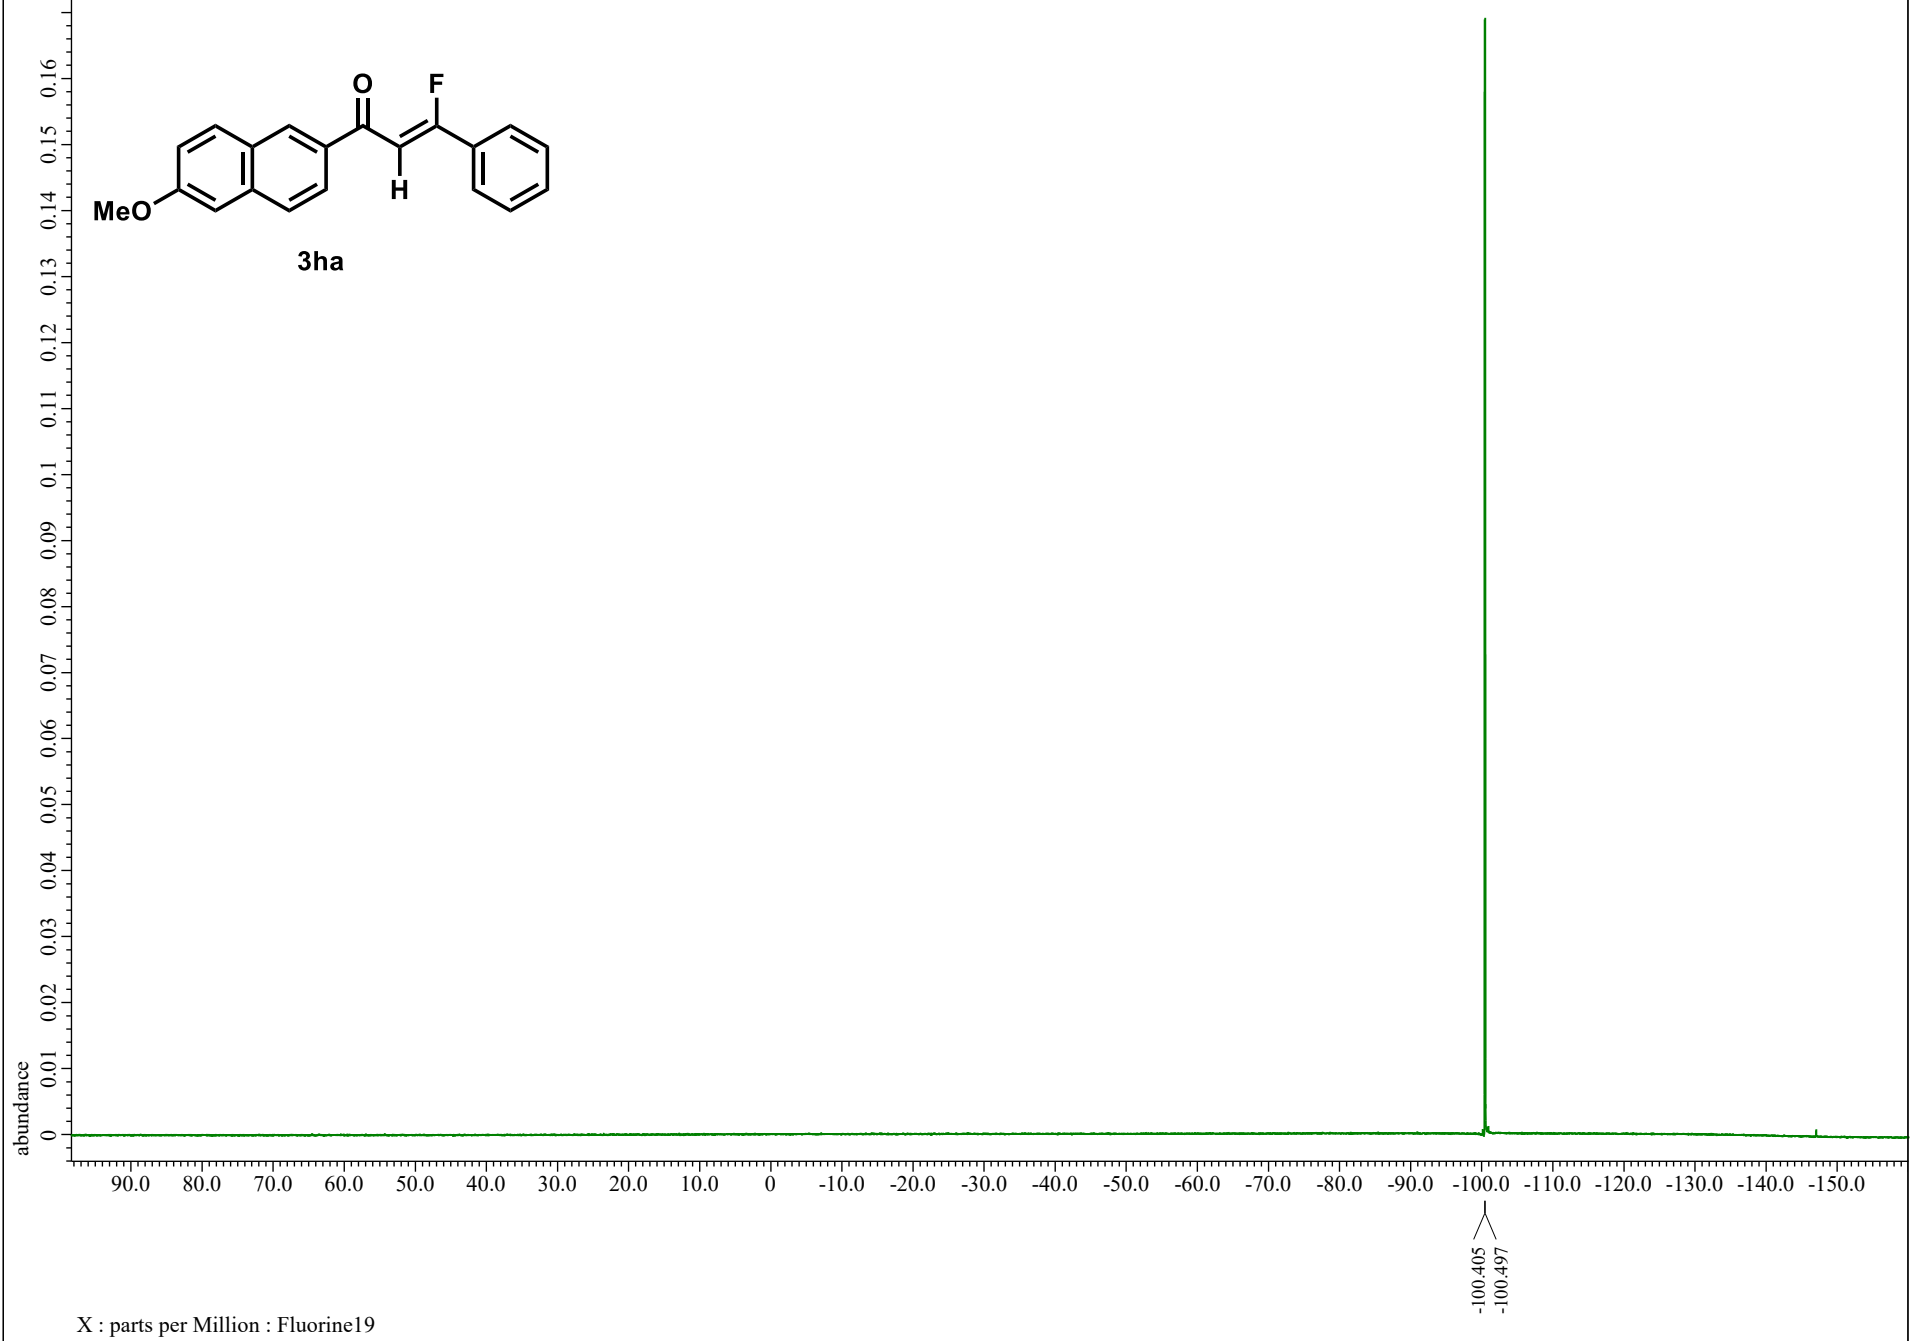

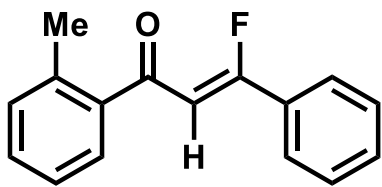

3ia

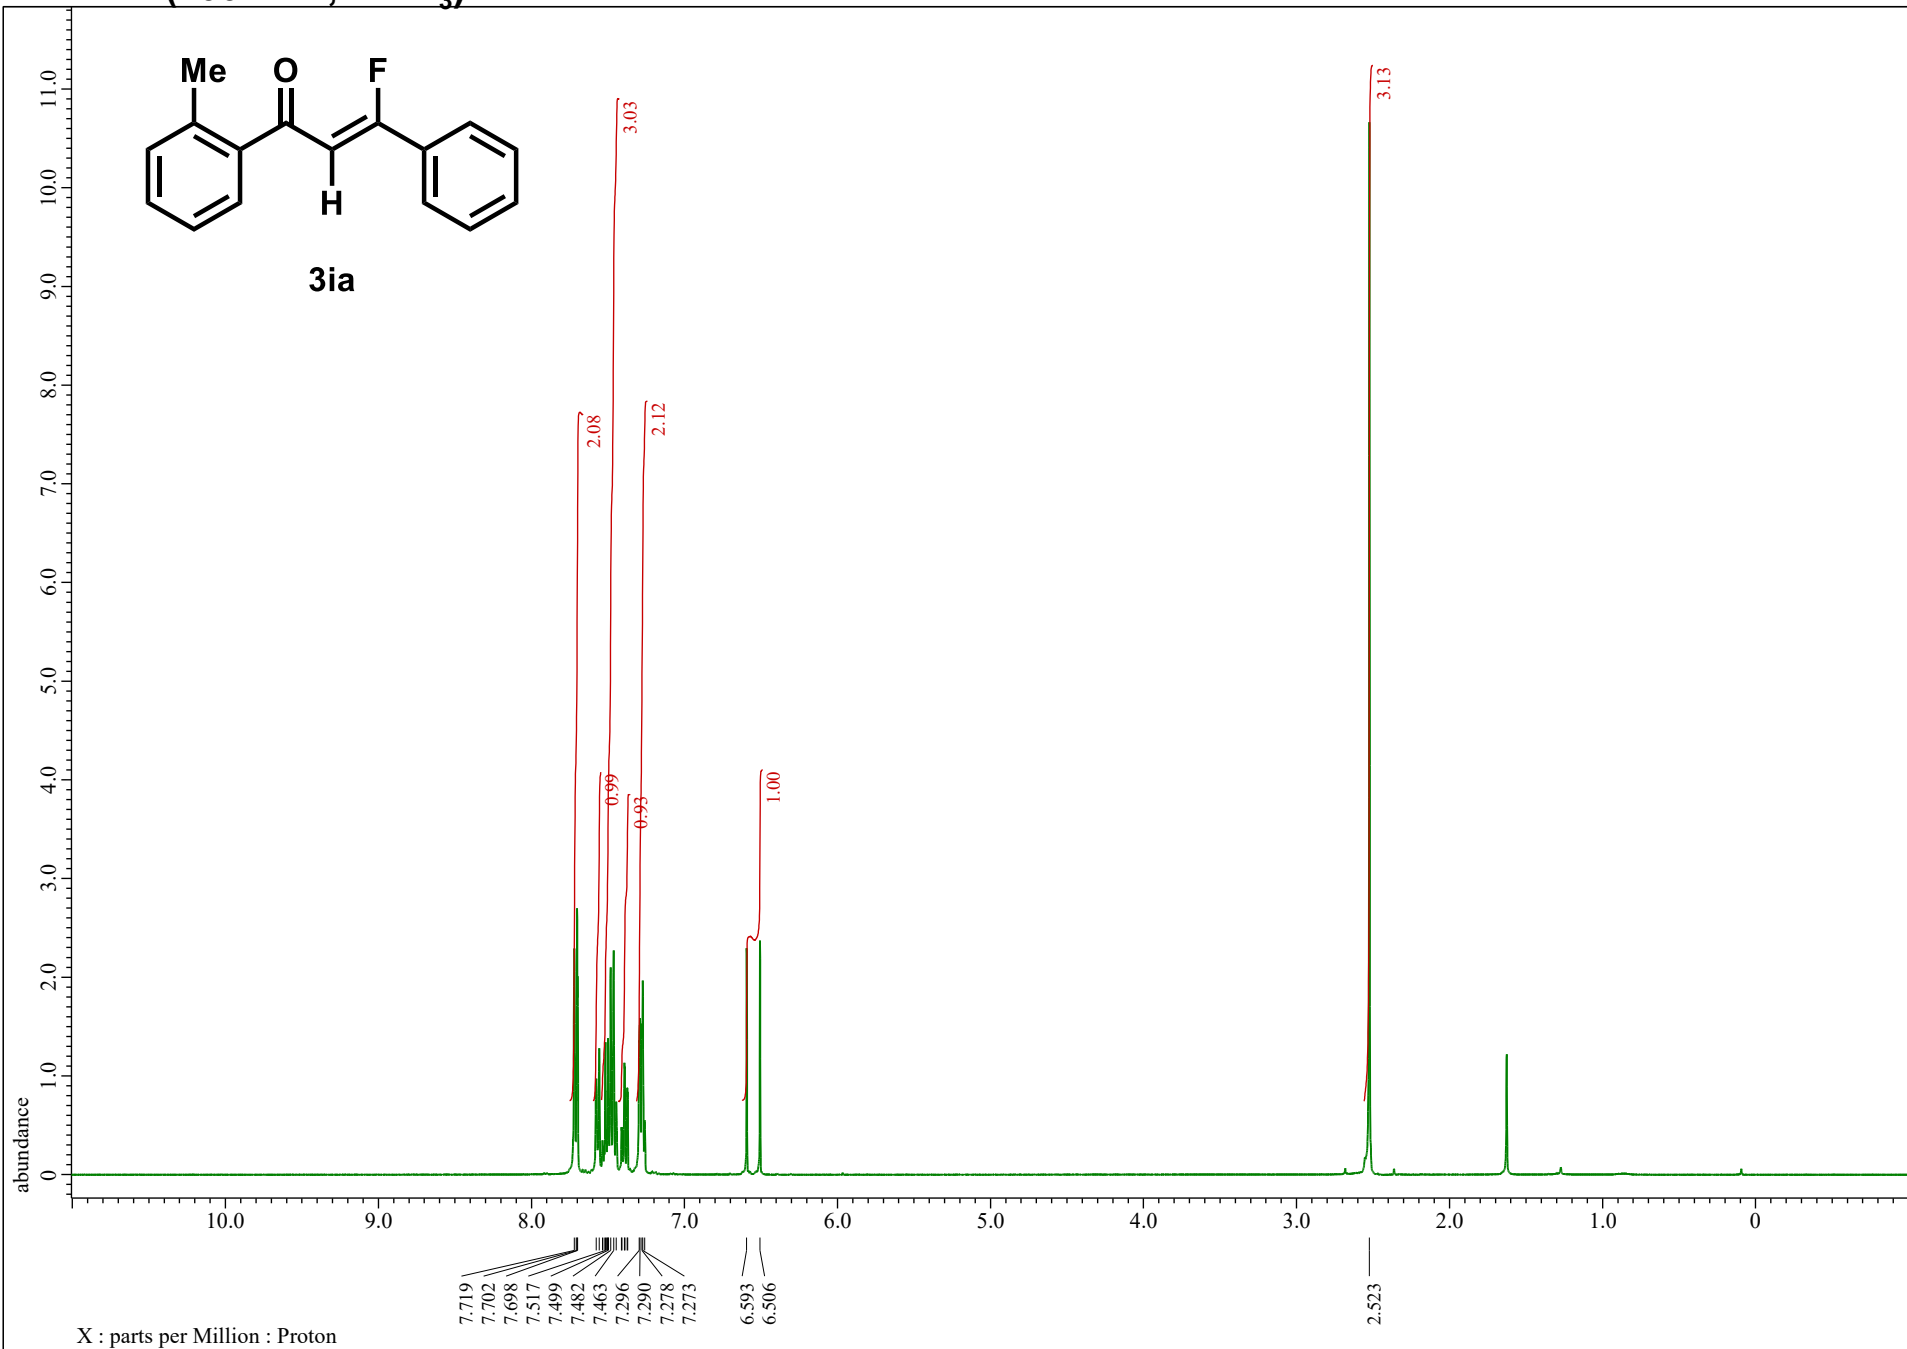

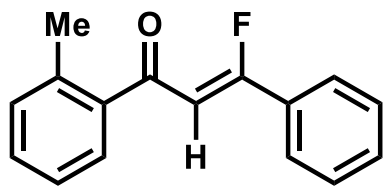

**3ia**

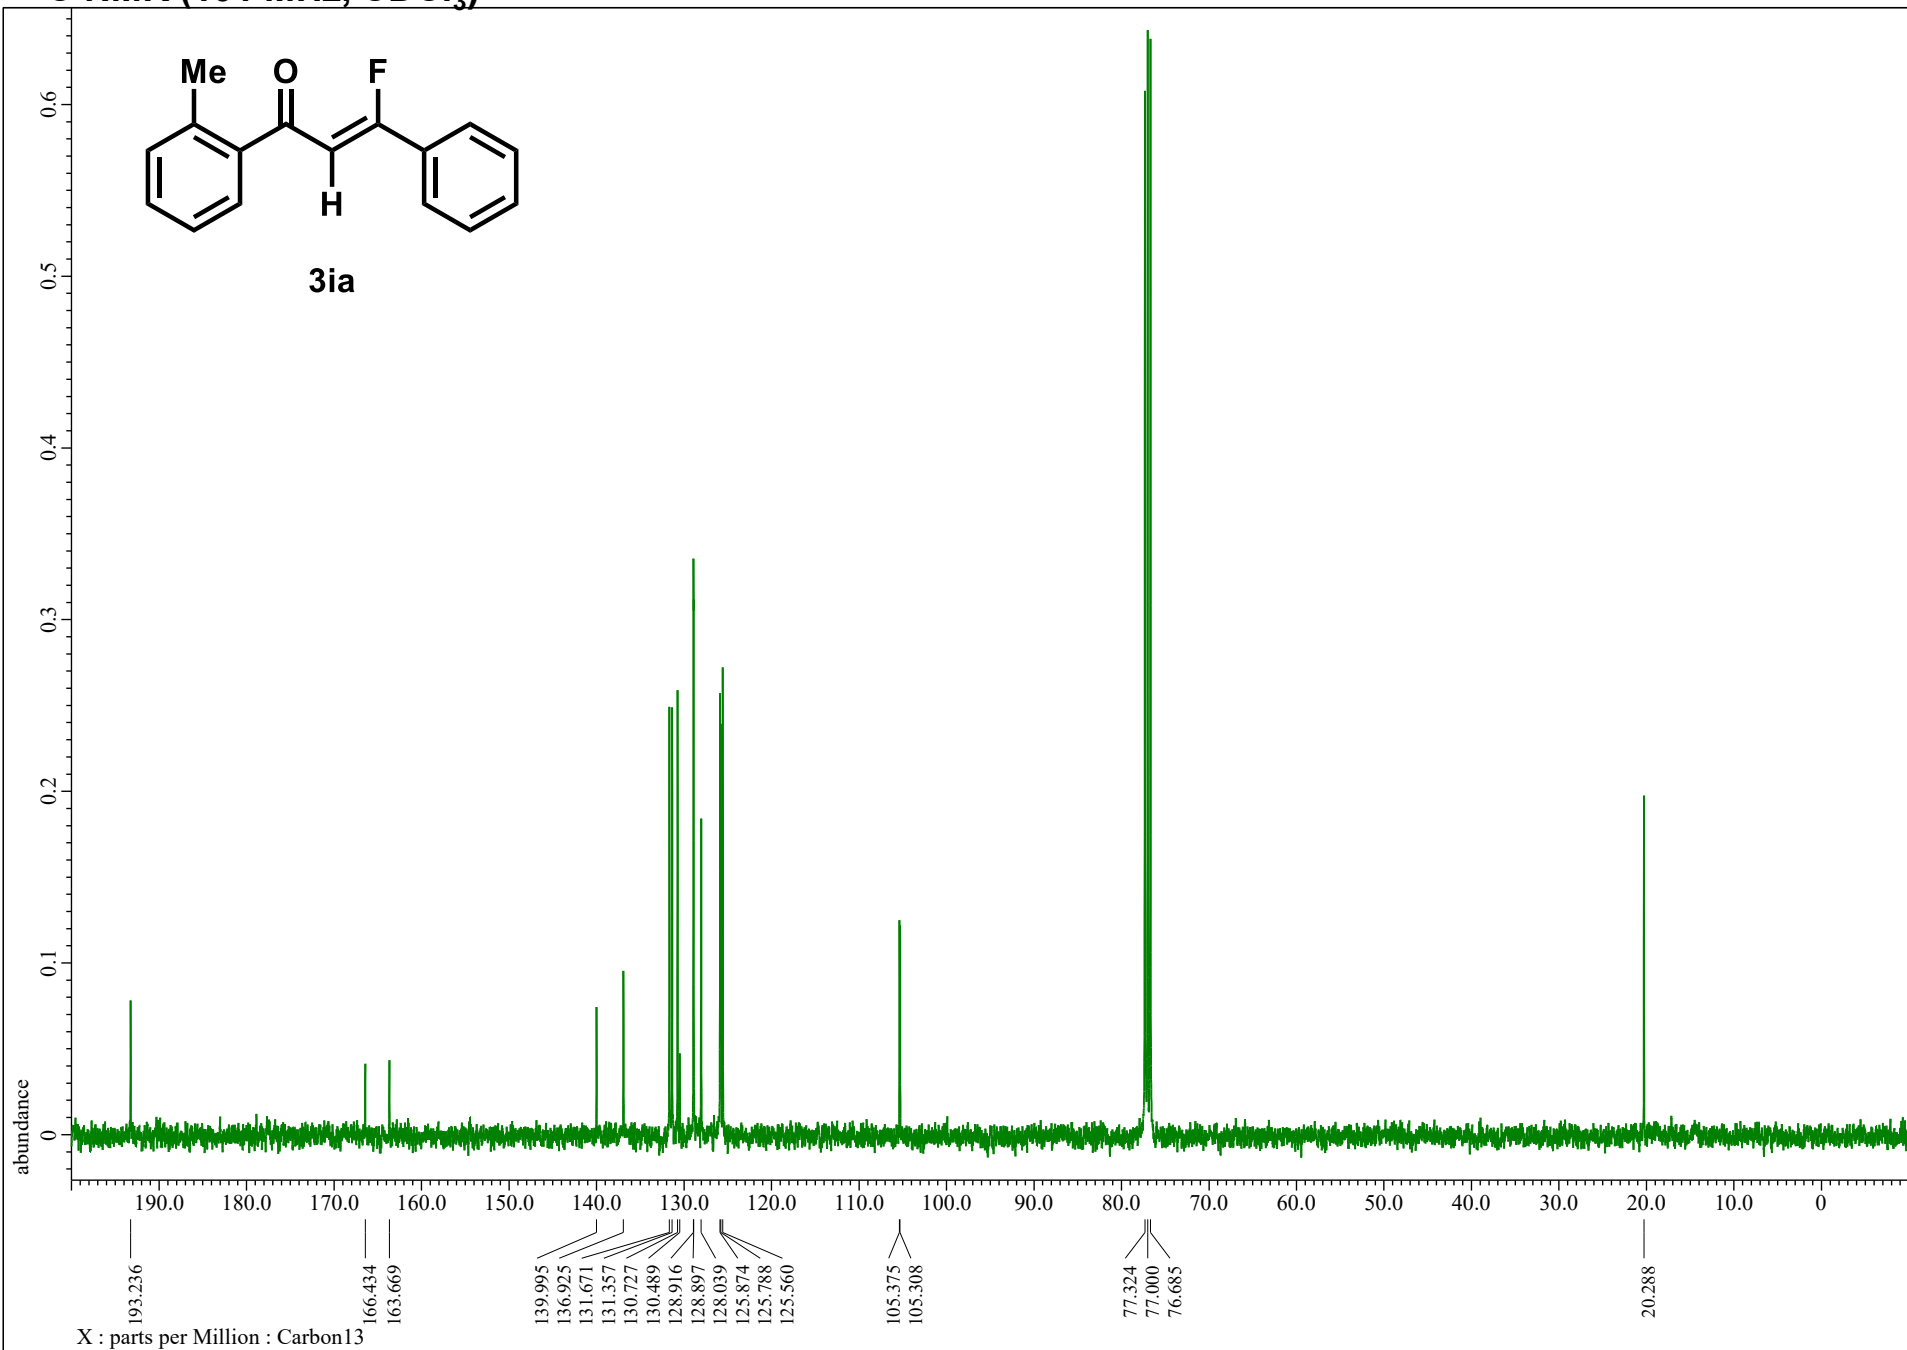

**<sup>19</sup>F NMR (376 MHz, CDCl<sub>3</sub>)**

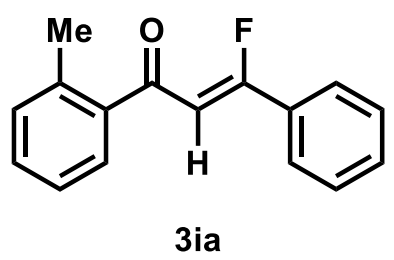

+ *E* isomer

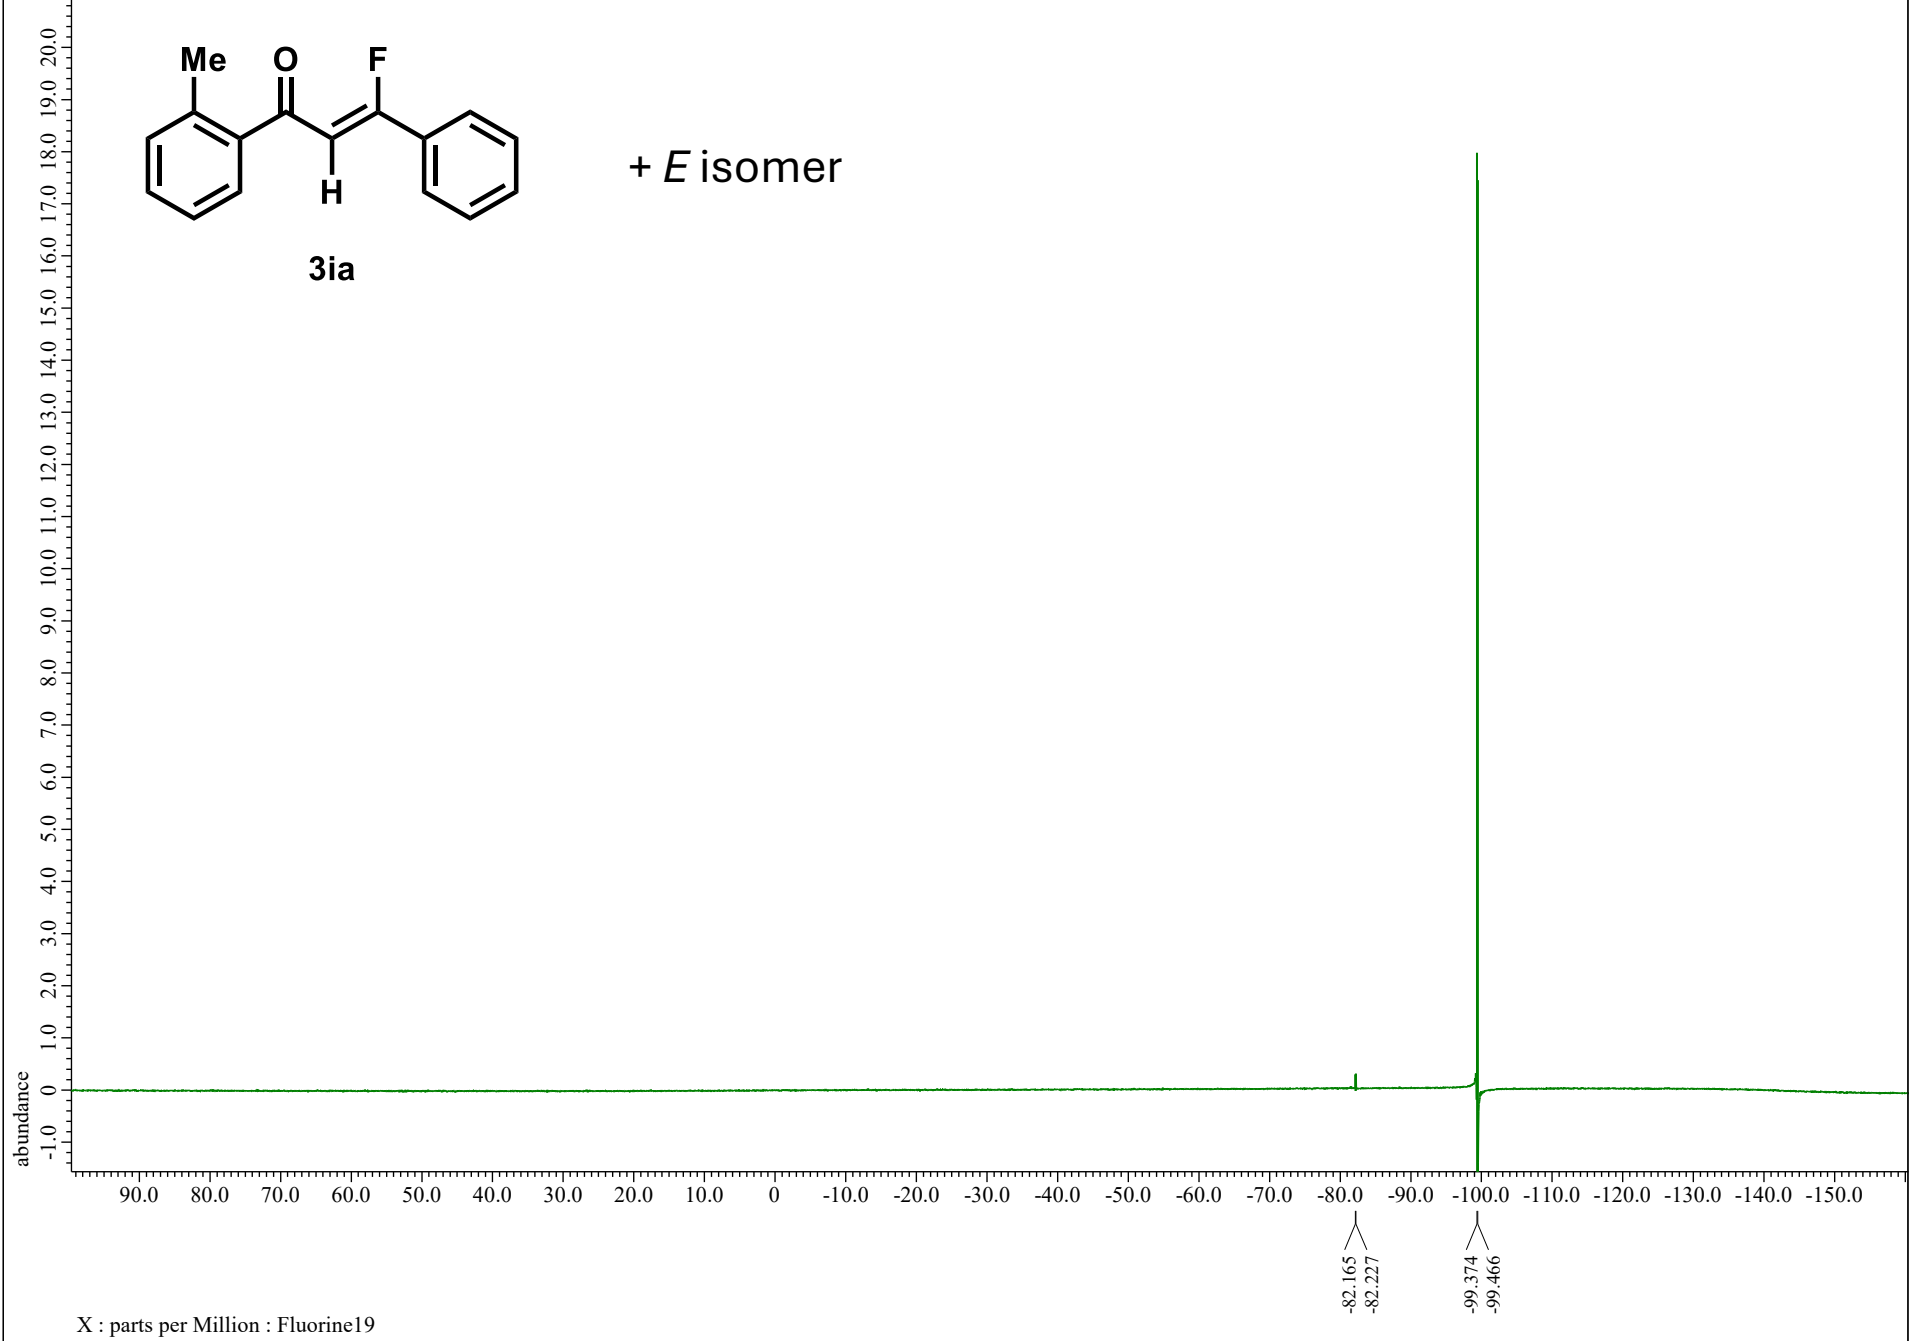

X : parts per Million : Fluorine19

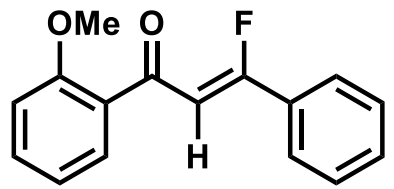

**3ja**

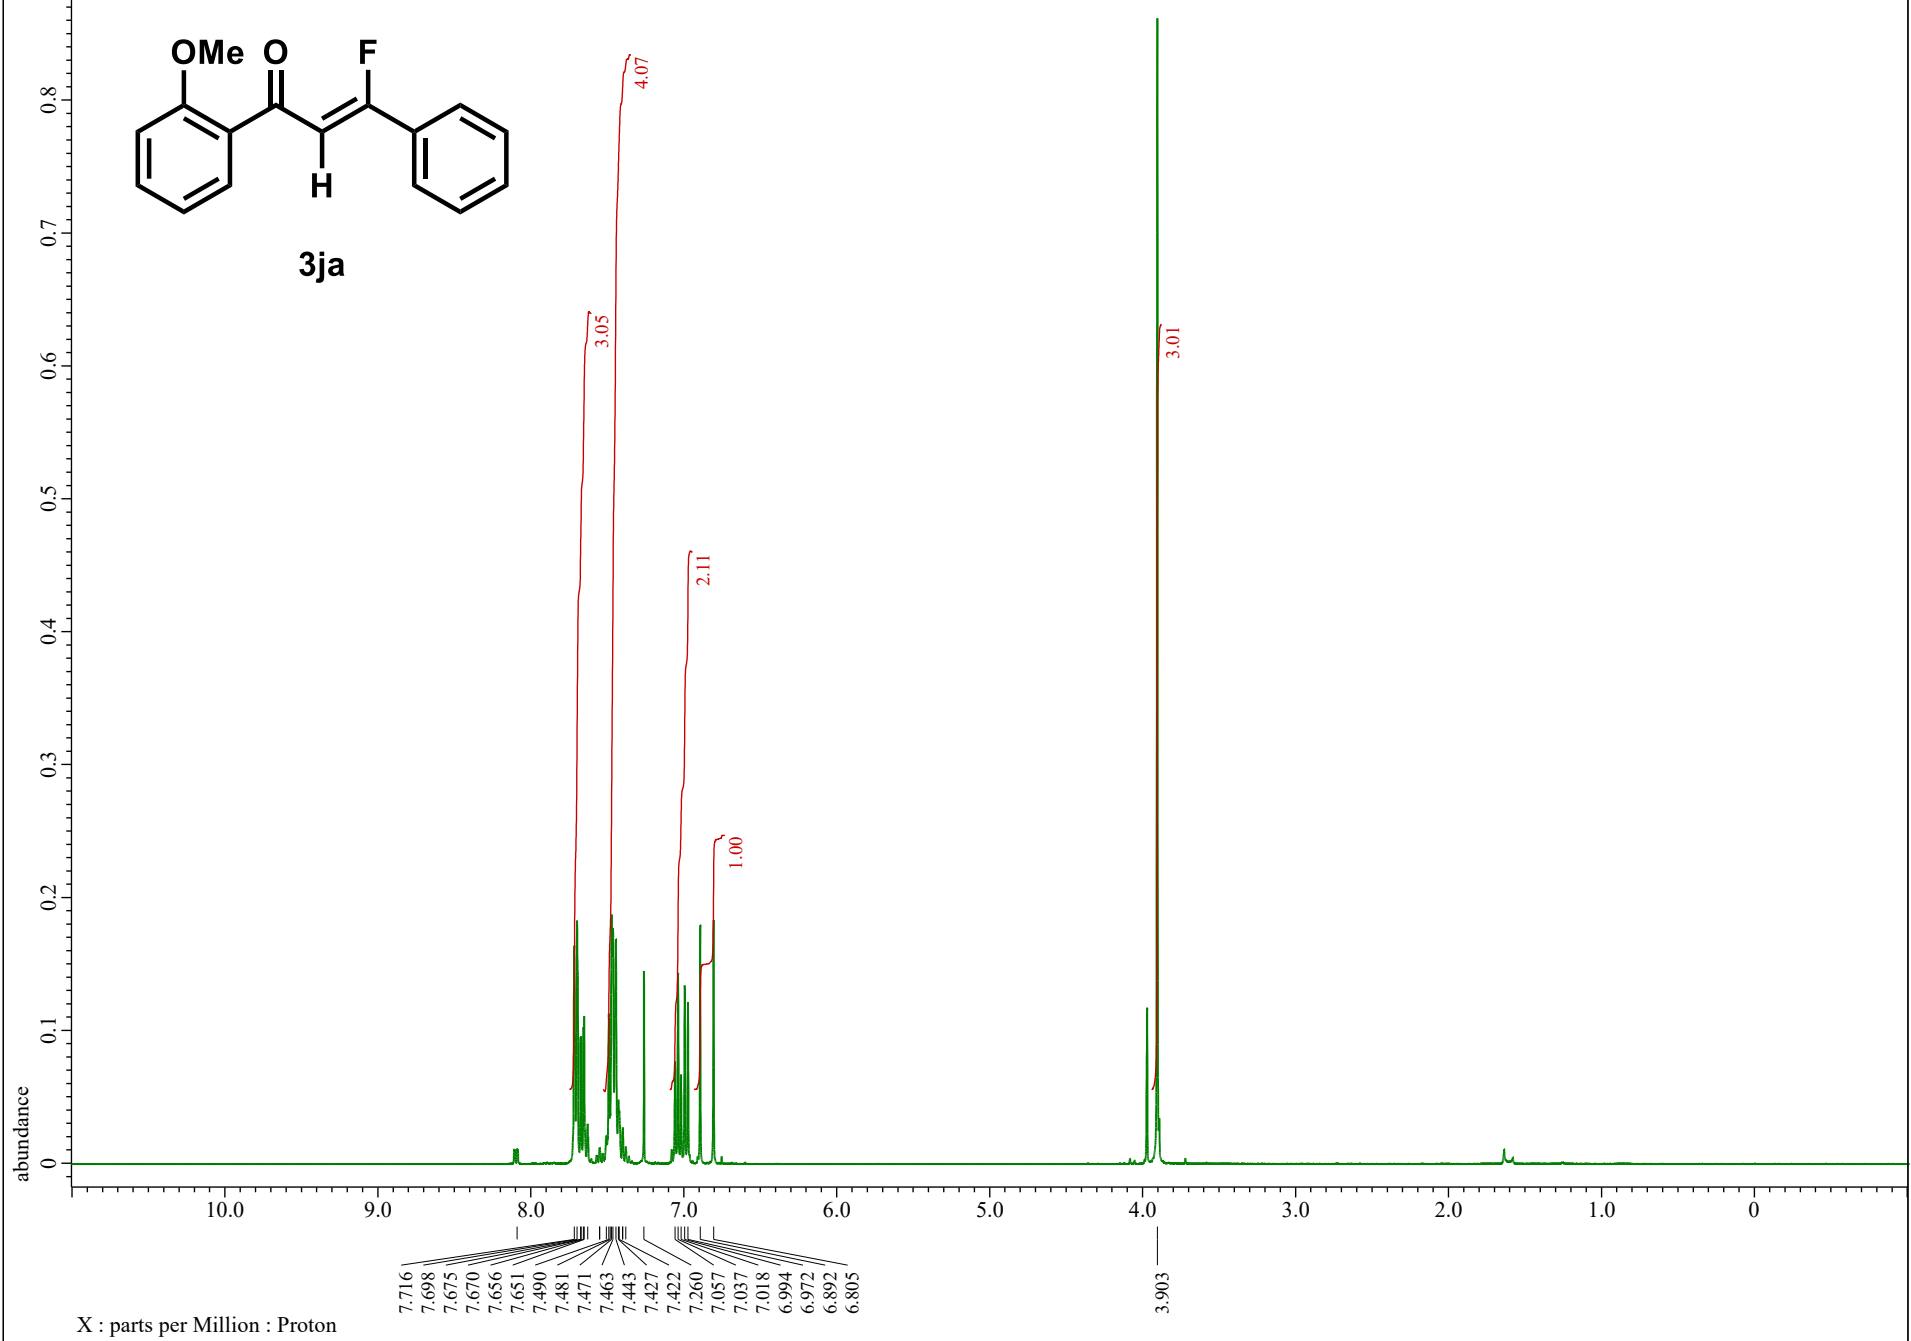

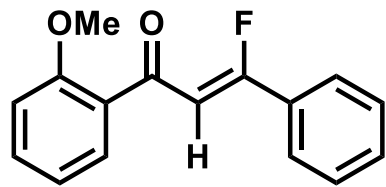

**3ja**

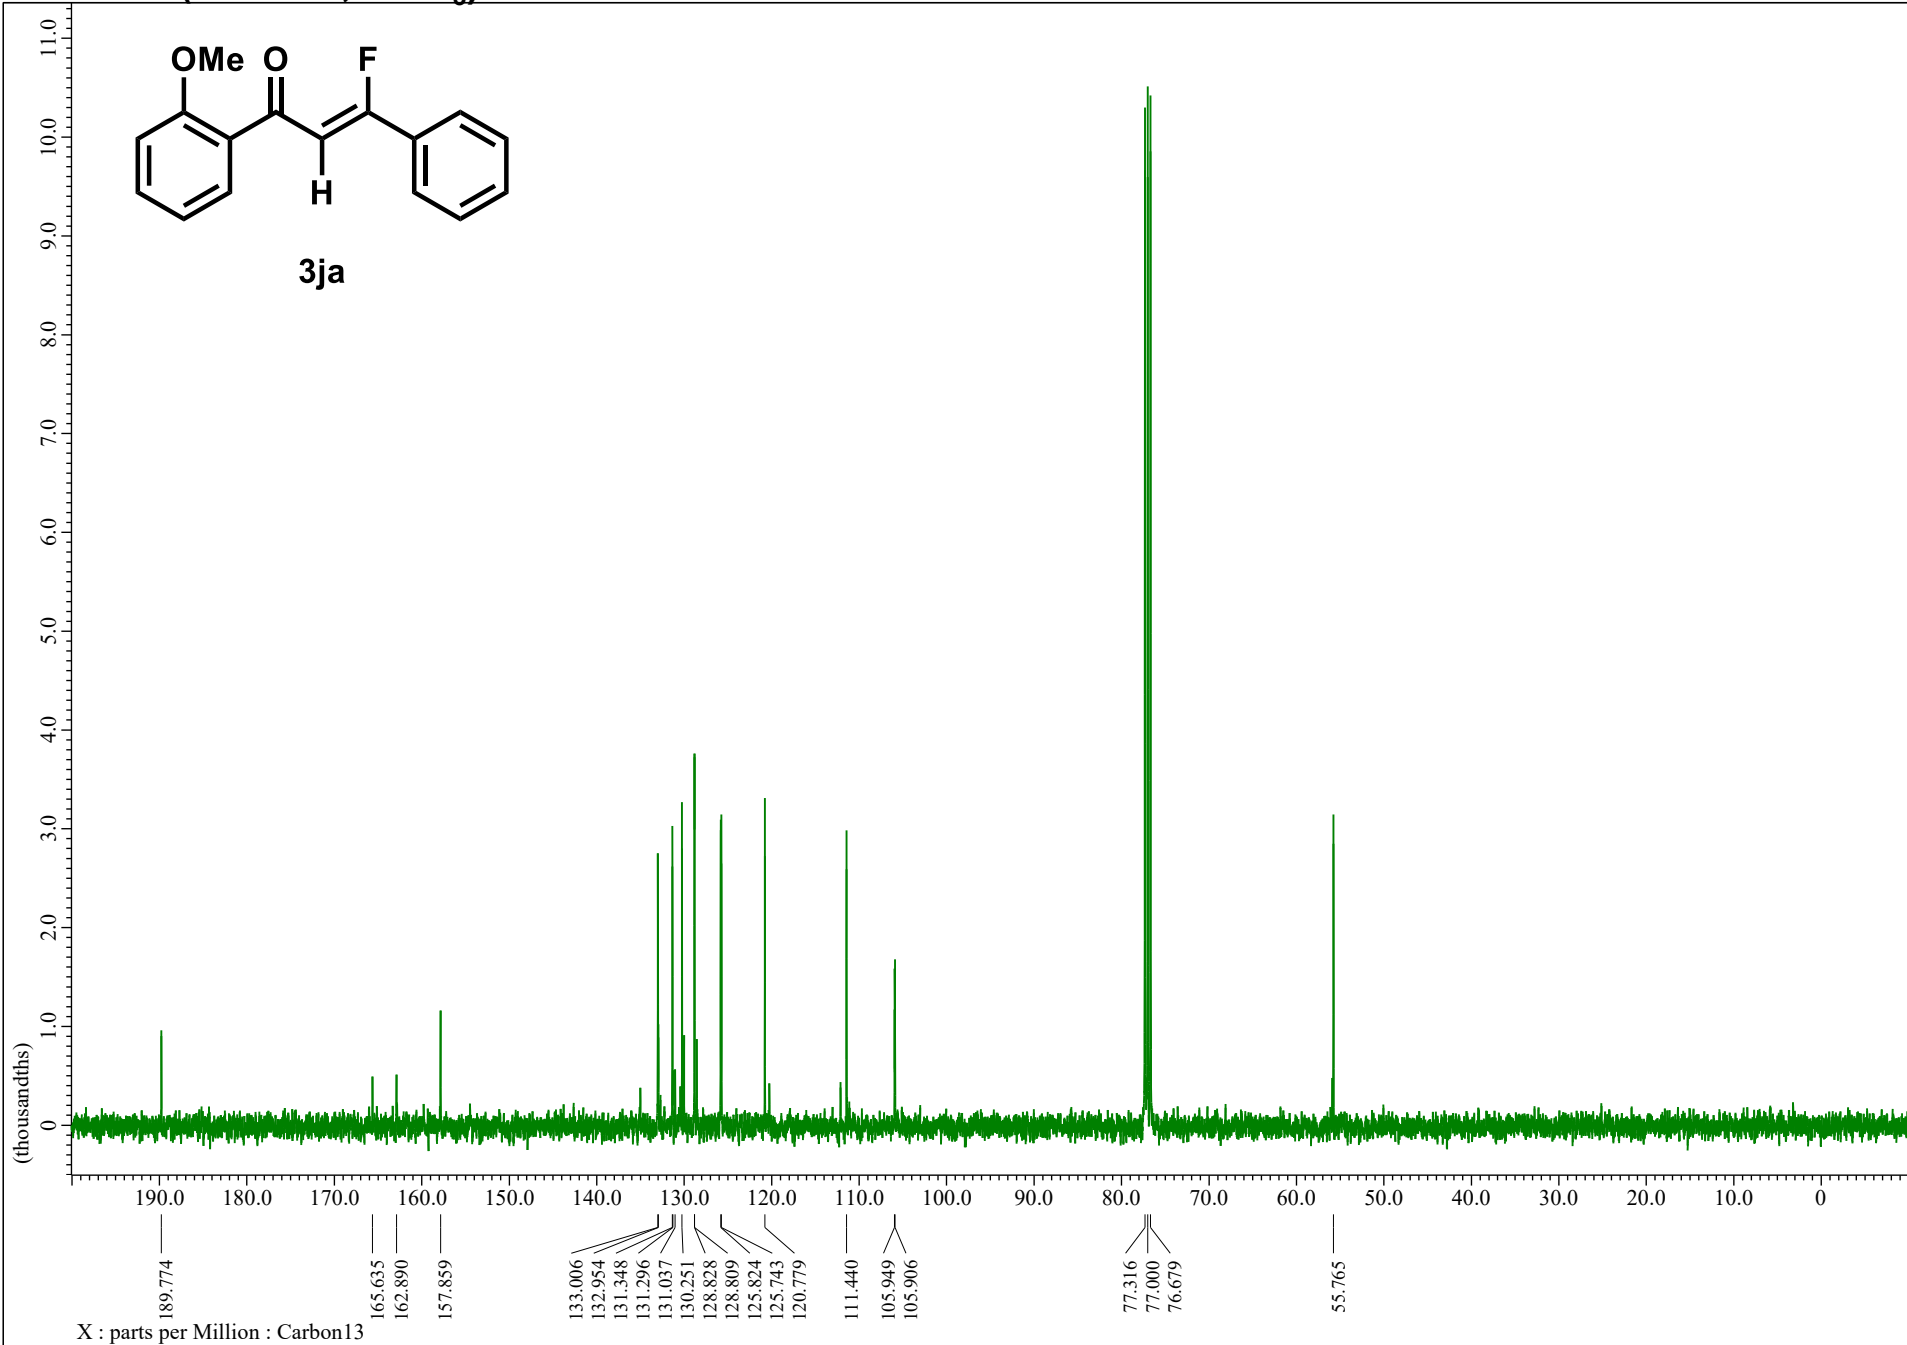

**<sup>19</sup>F NMR (376 MHz, CDCl<sub>3</sub>)**

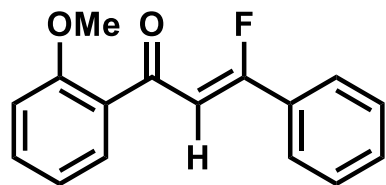

**3ja**

+ *E* isomer

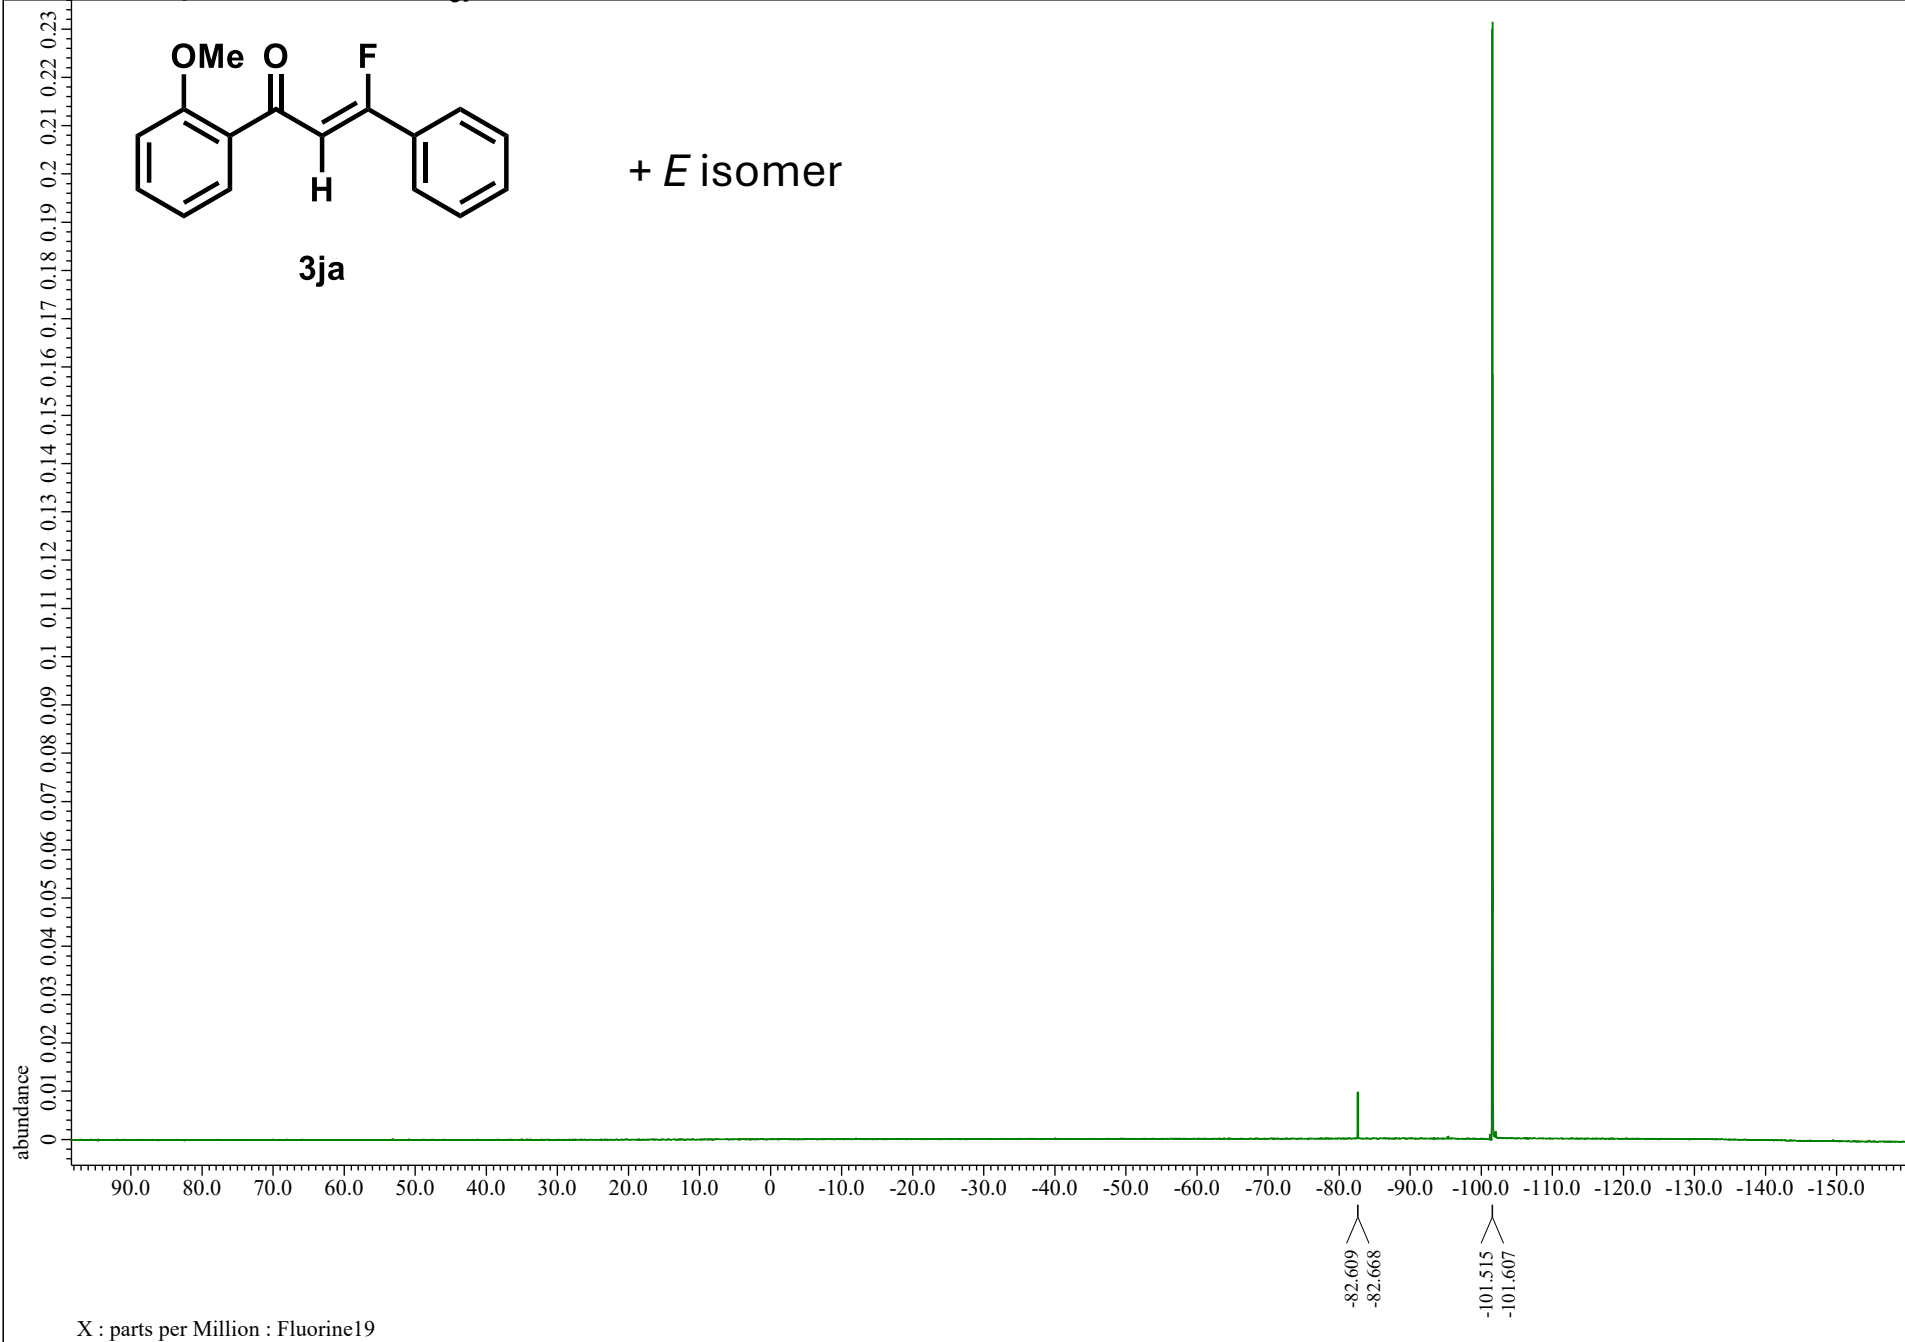

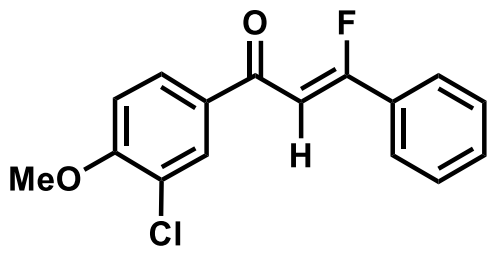

3ka

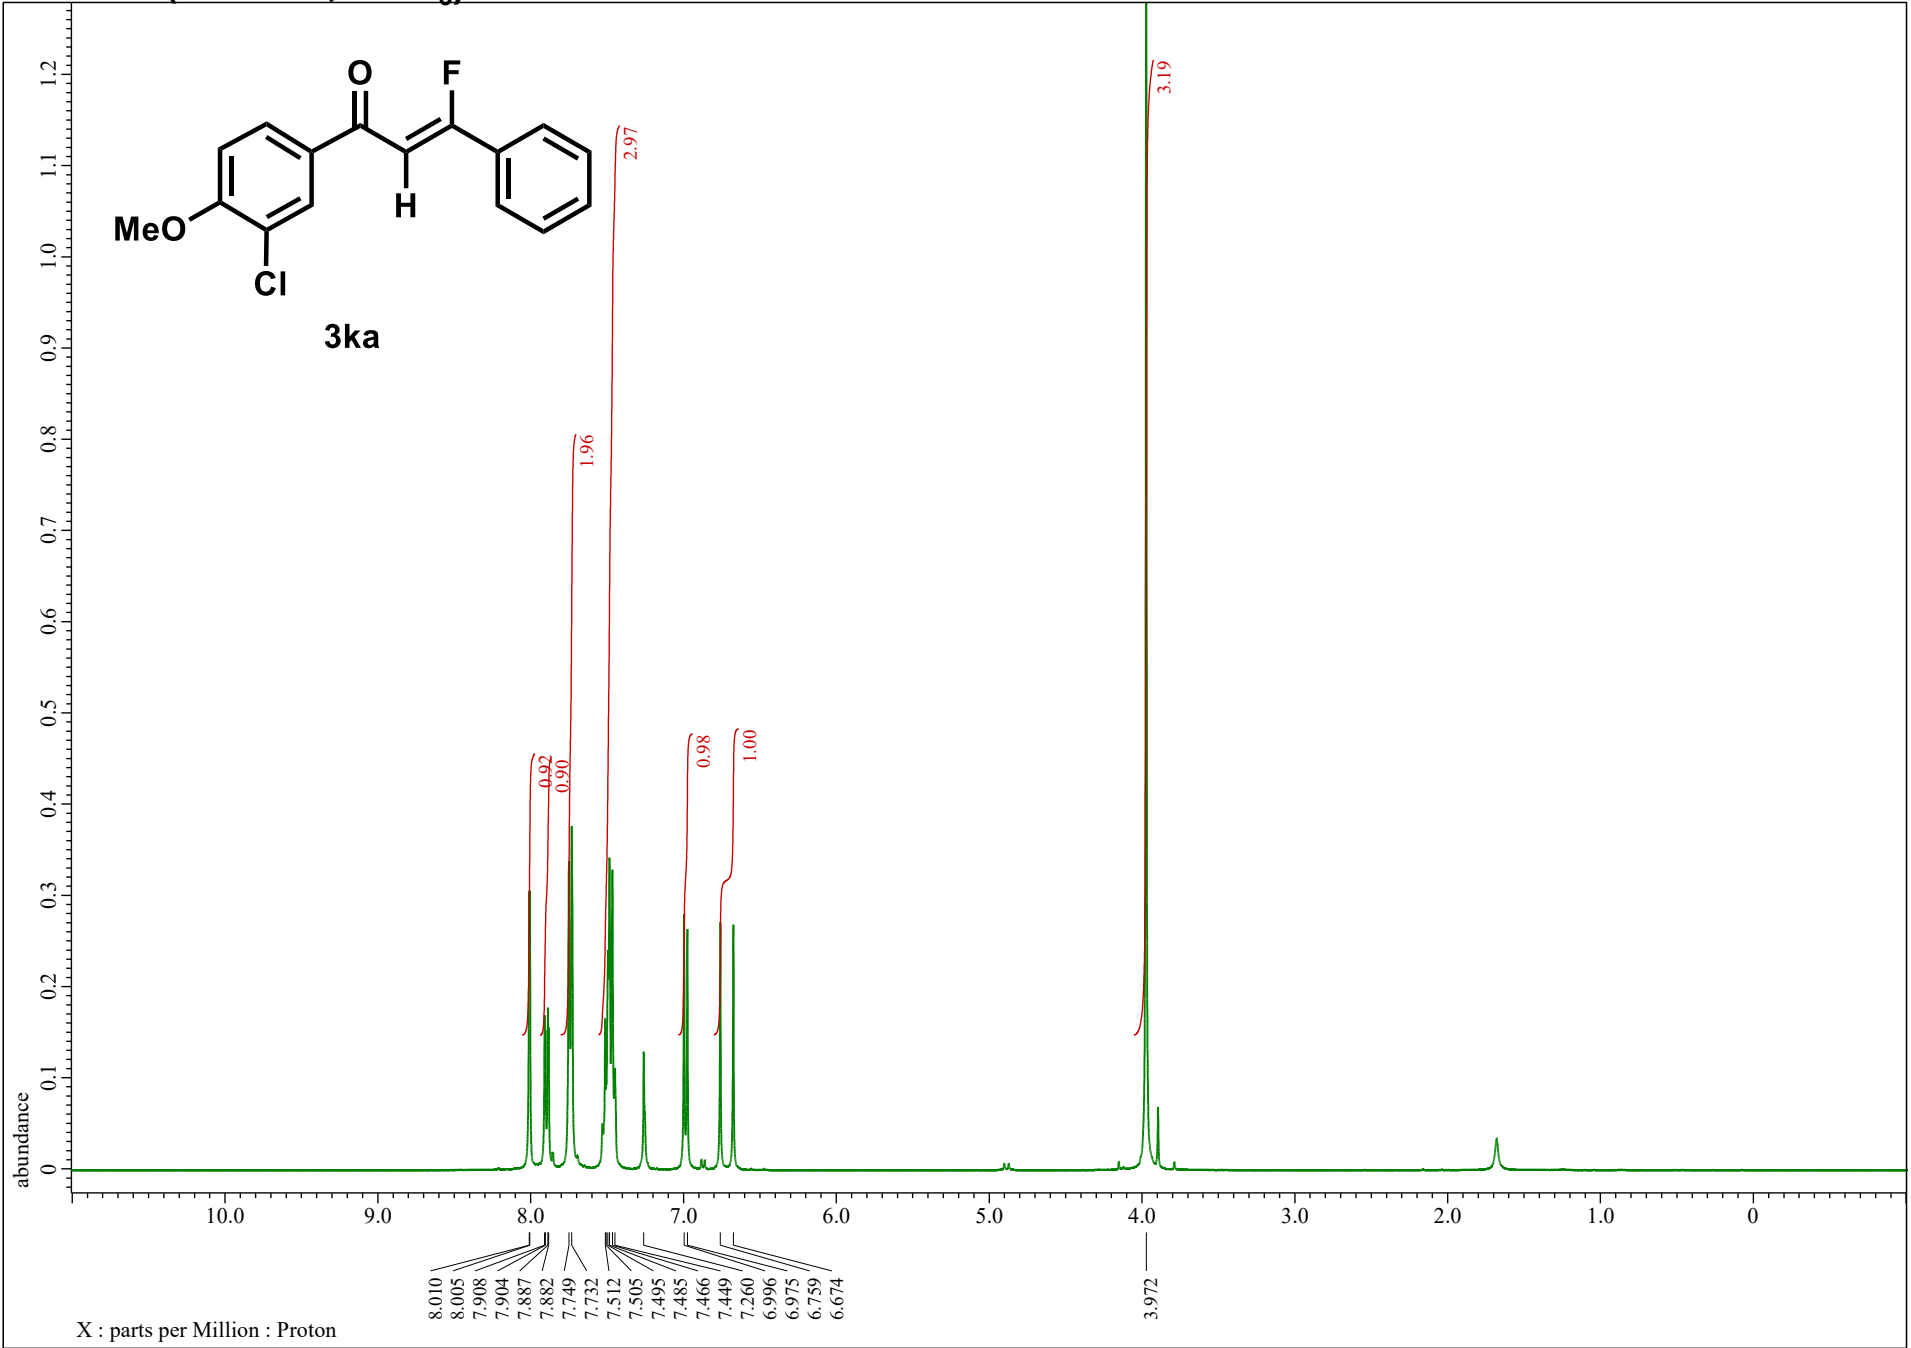

X : parts per Million : Proton

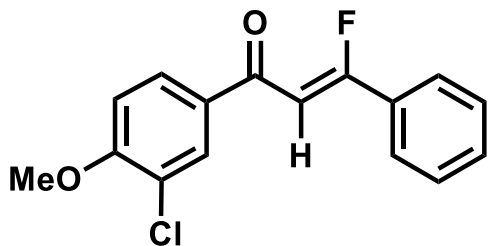

3ka

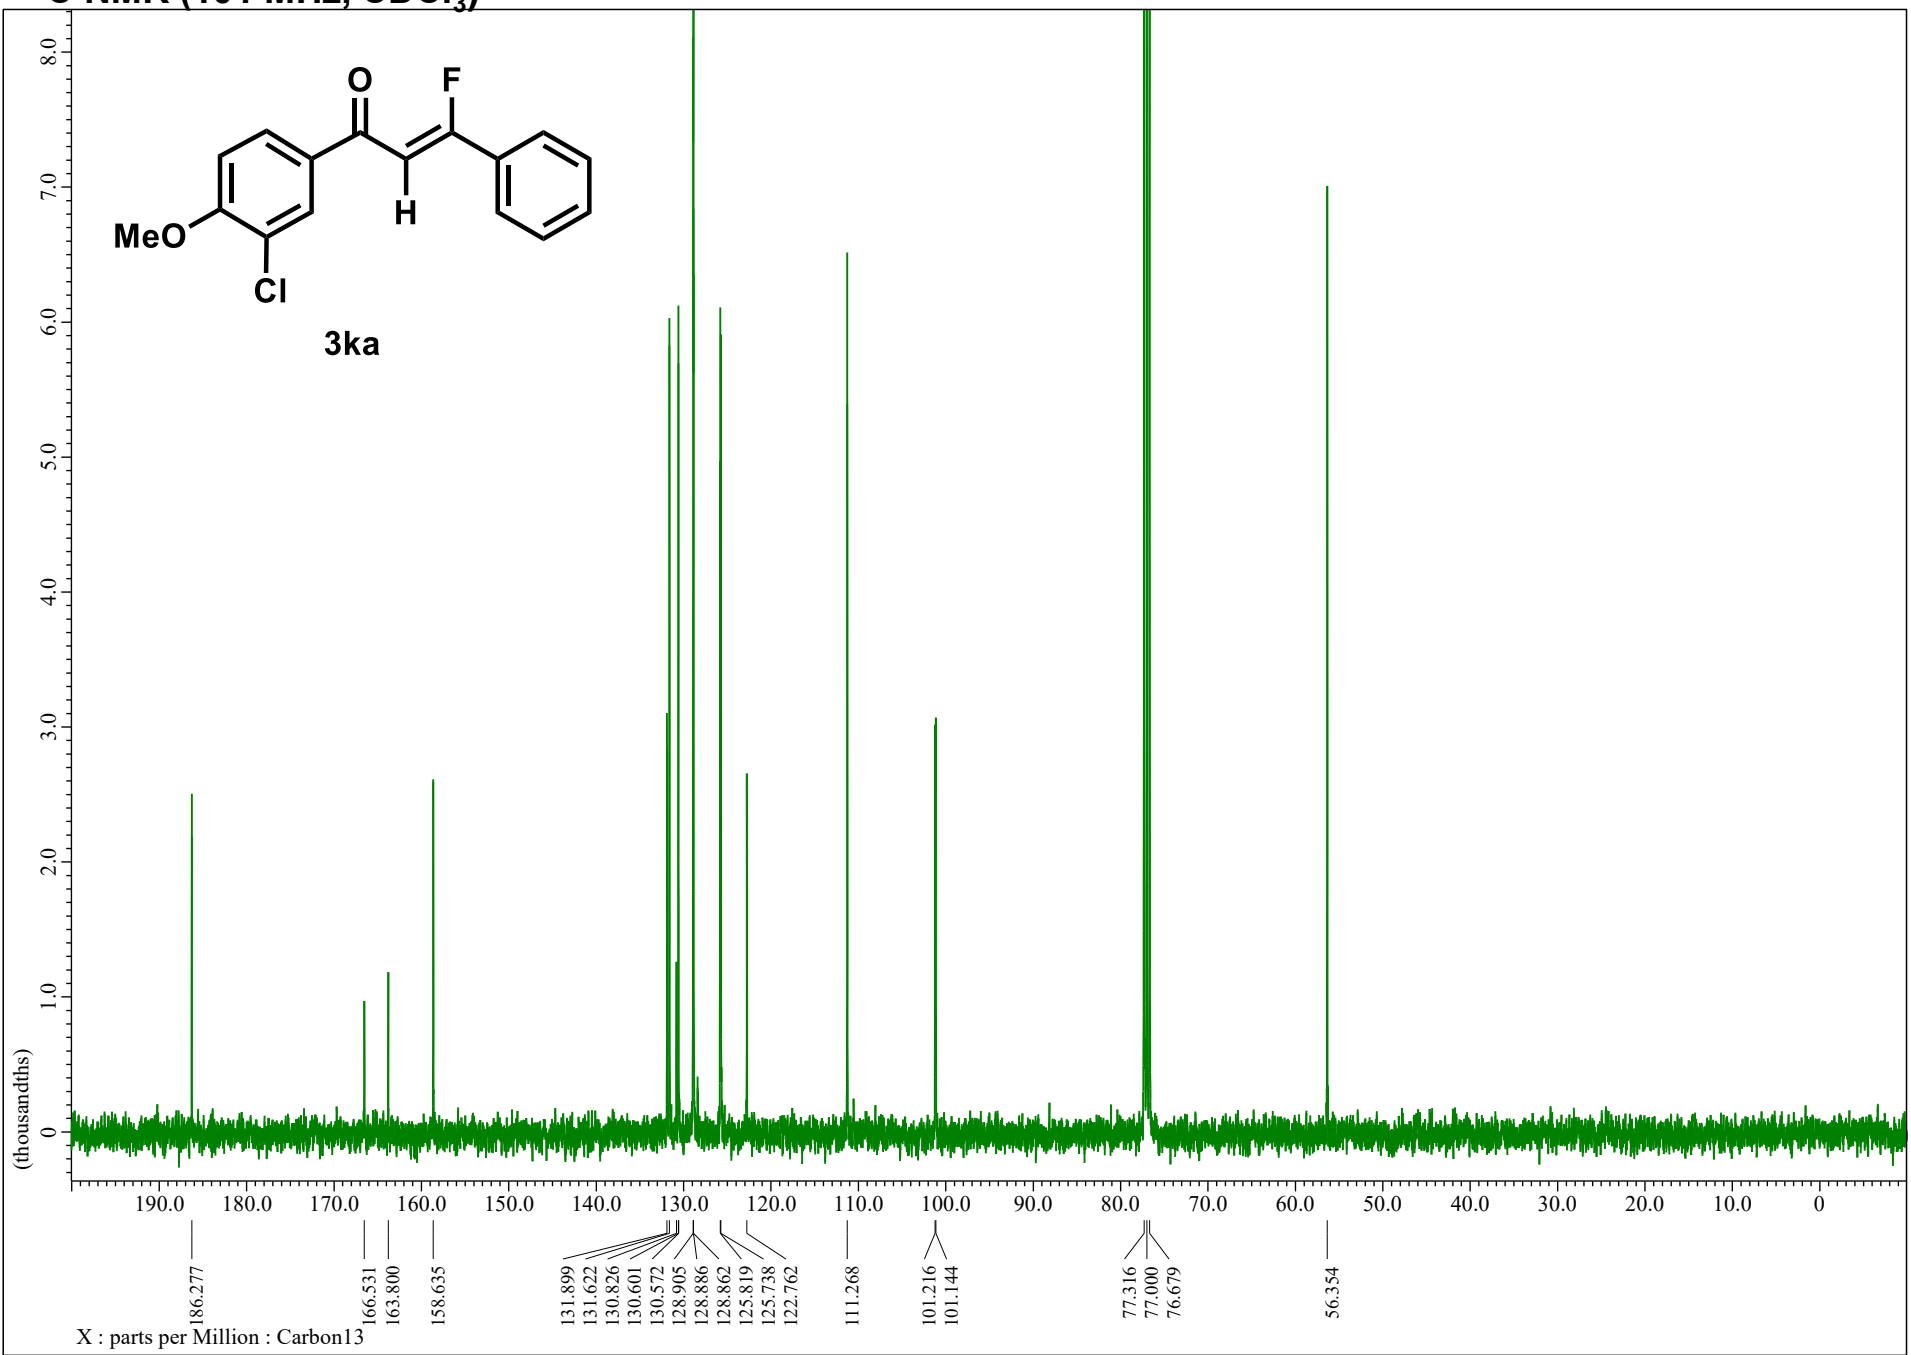

X : parts per Million : Carbon13

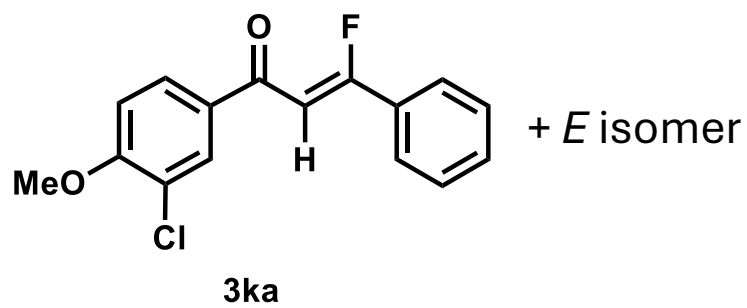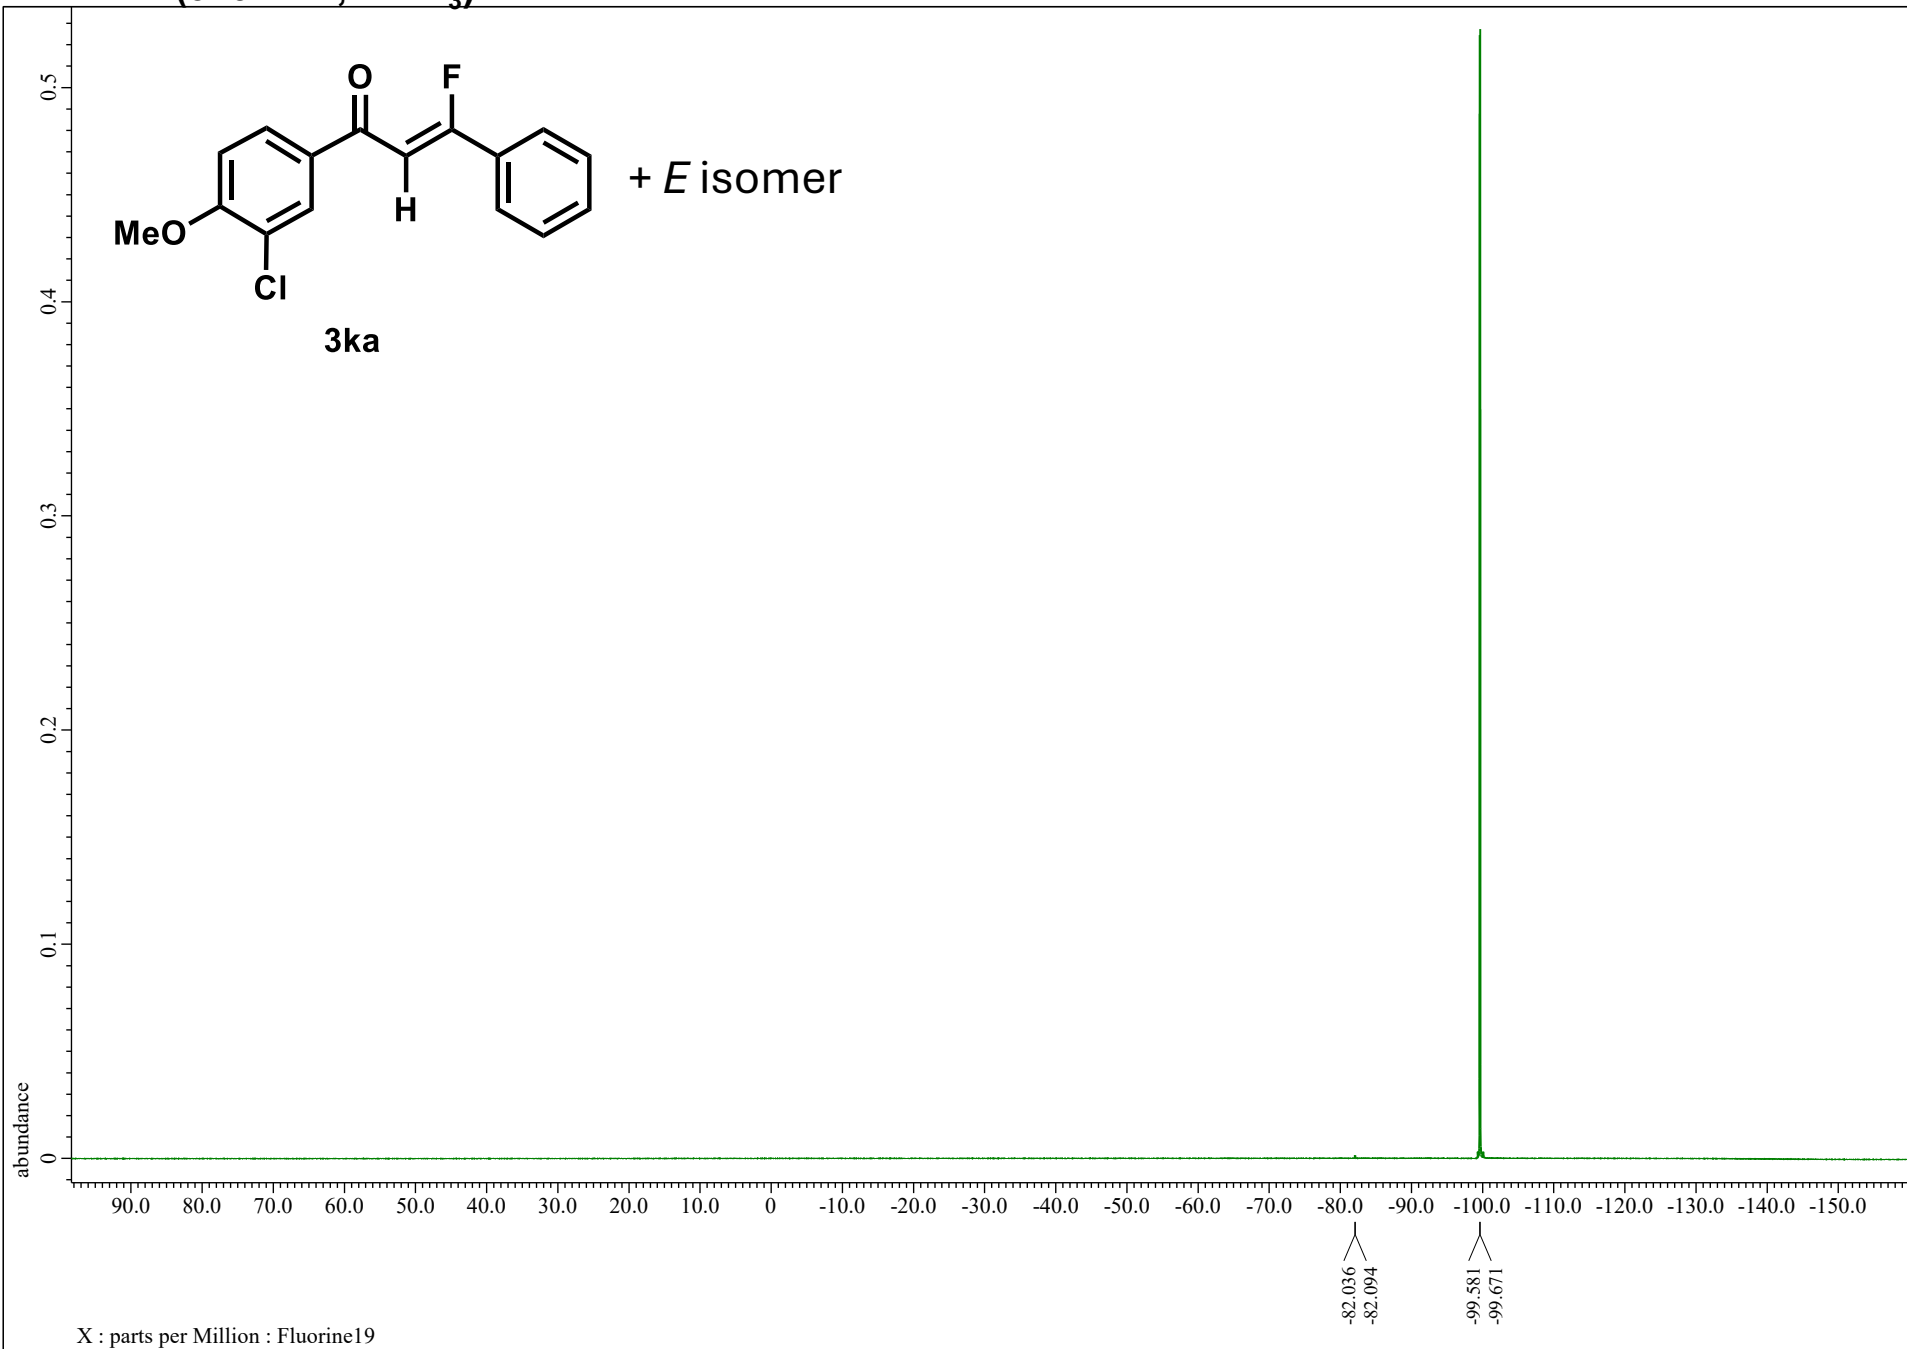

<sup>1</sup>H NMR (400 MHz, CDCl<sub>3</sub>)

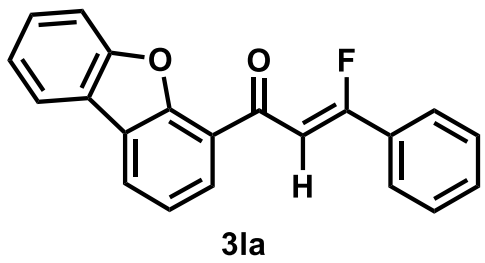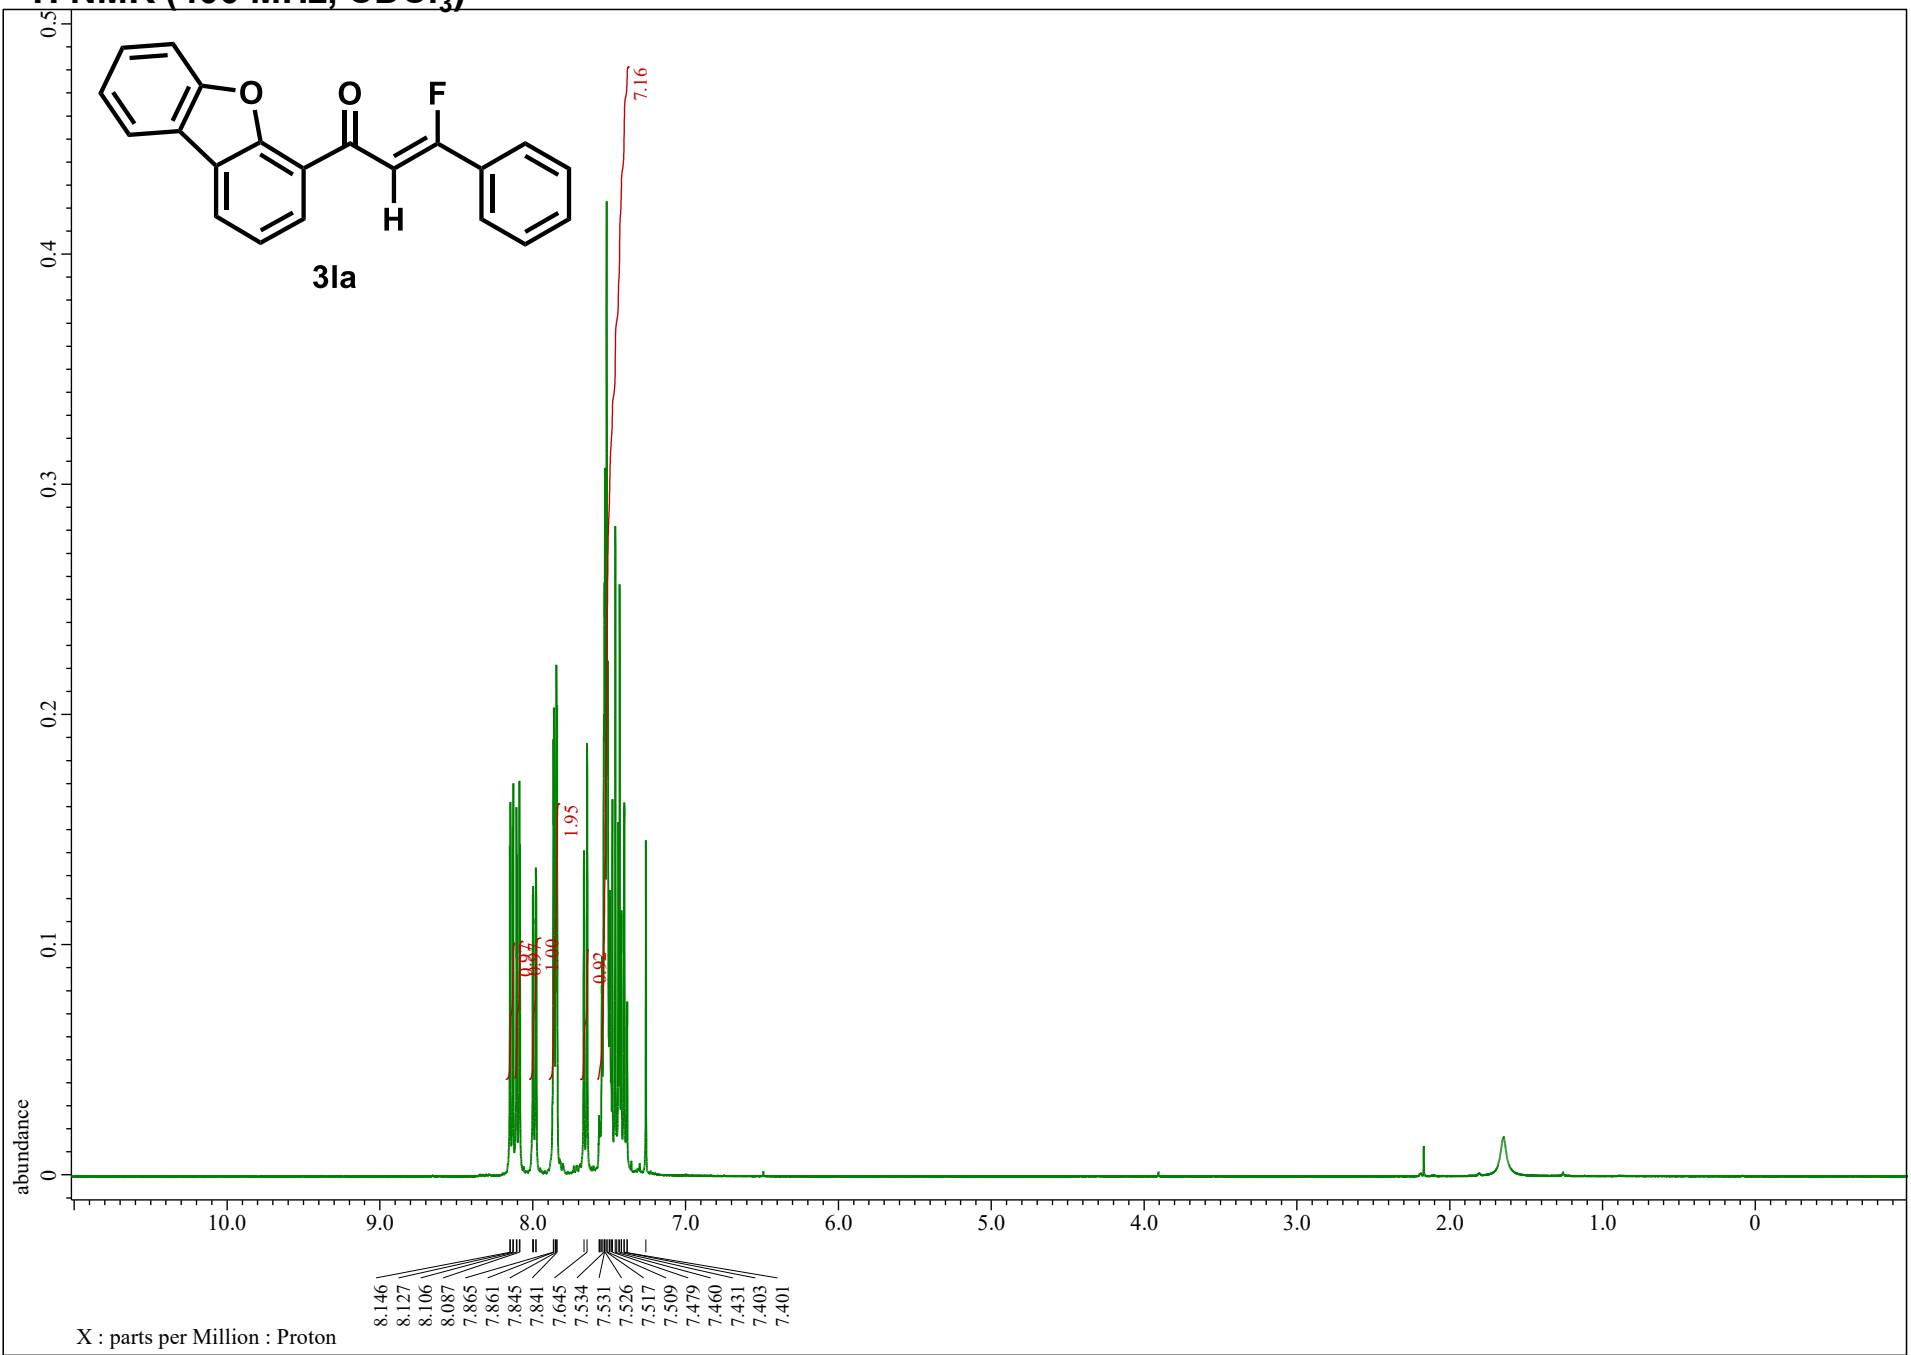

<sup>13</sup>C NMR (101 MHz, CDCl<sub>3</sub>)

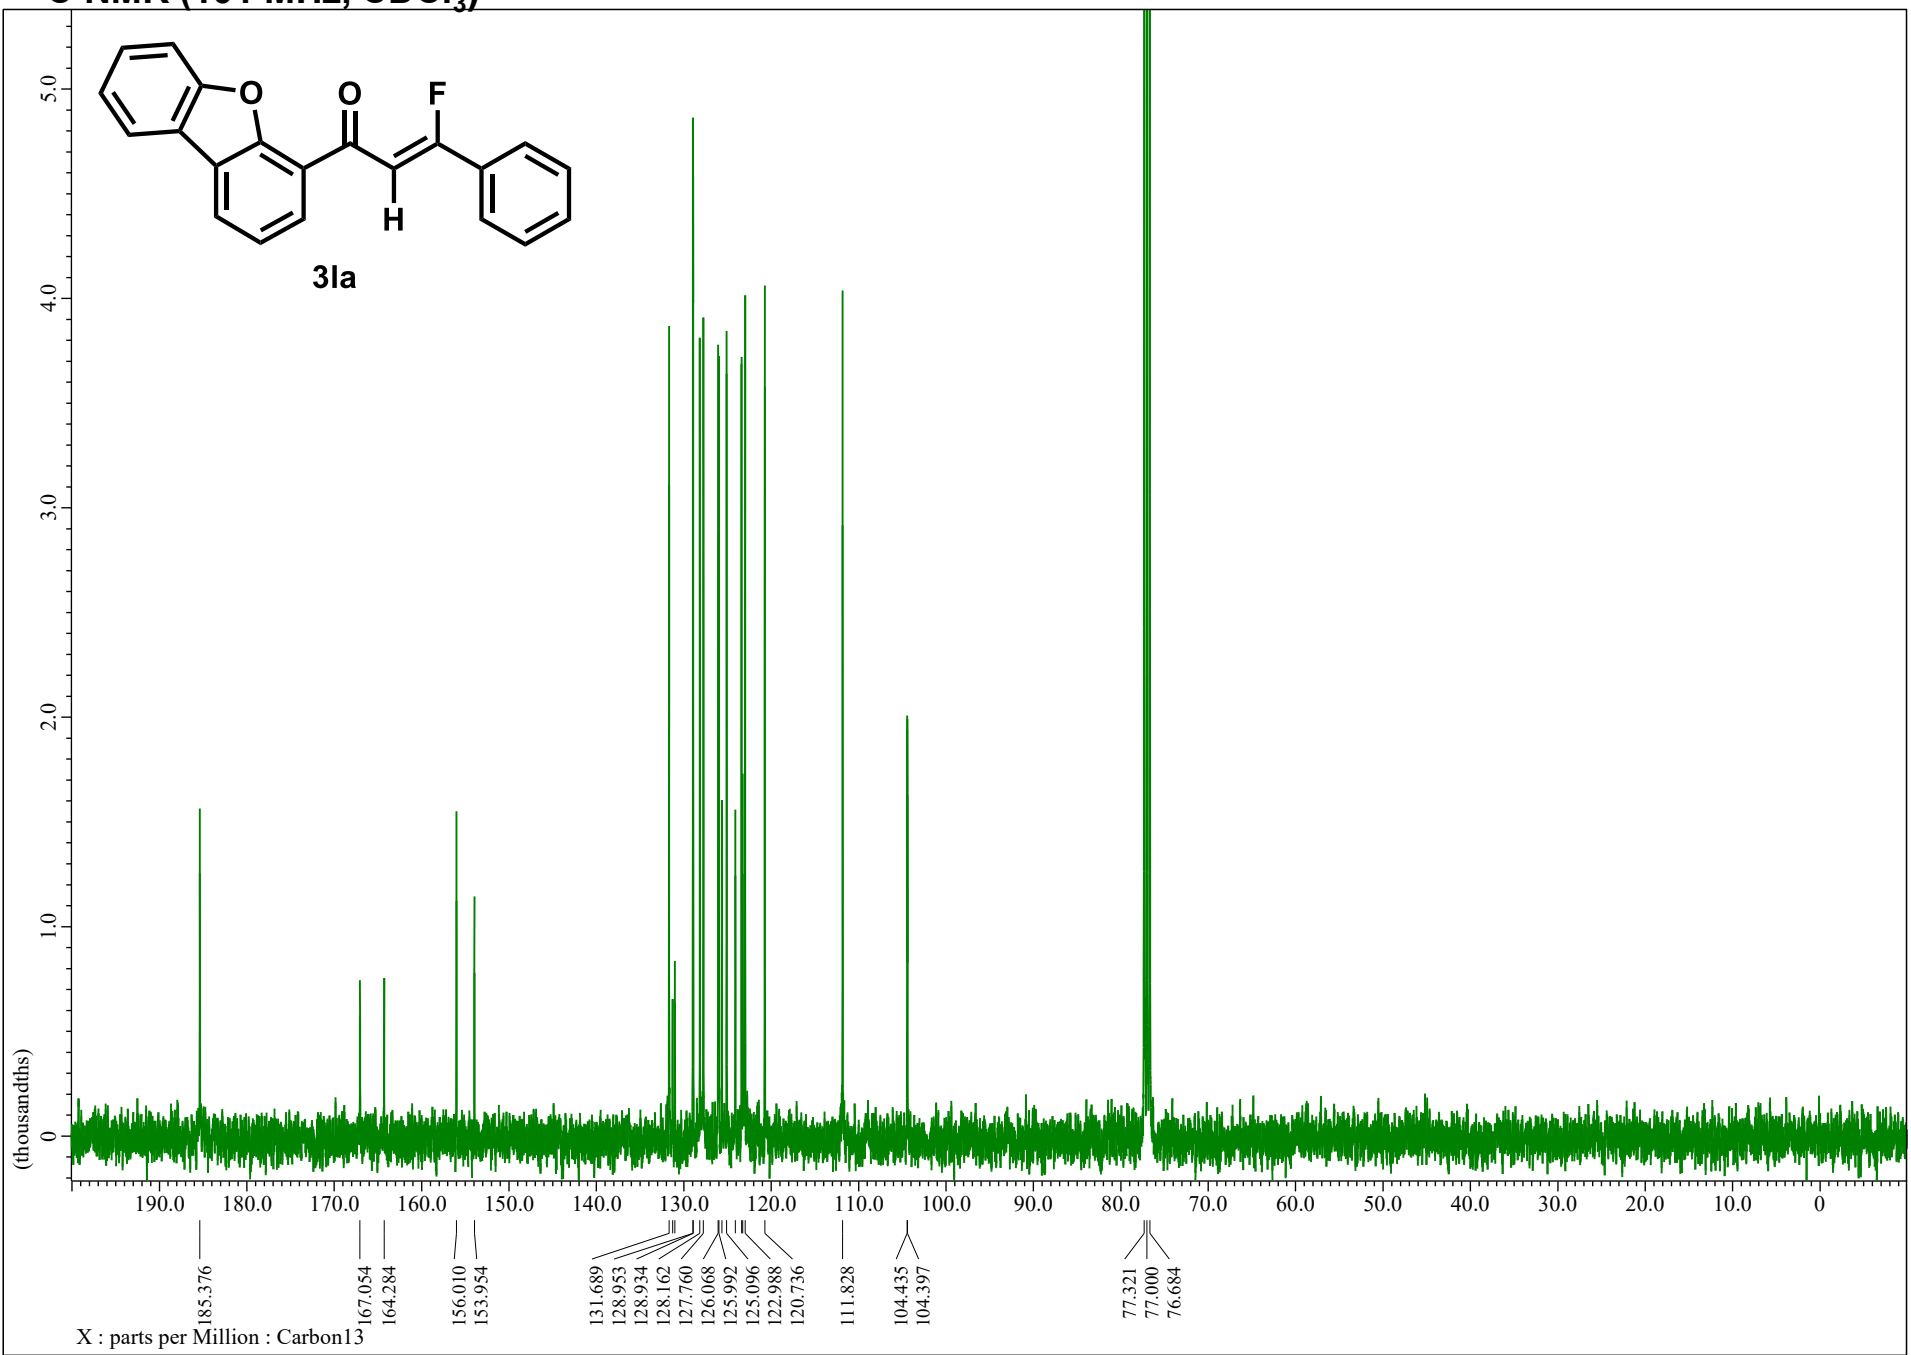

**<sup>19</sup>F NMR (376 MHz, CDCl<sub>3</sub>)**



+ *E* isomer

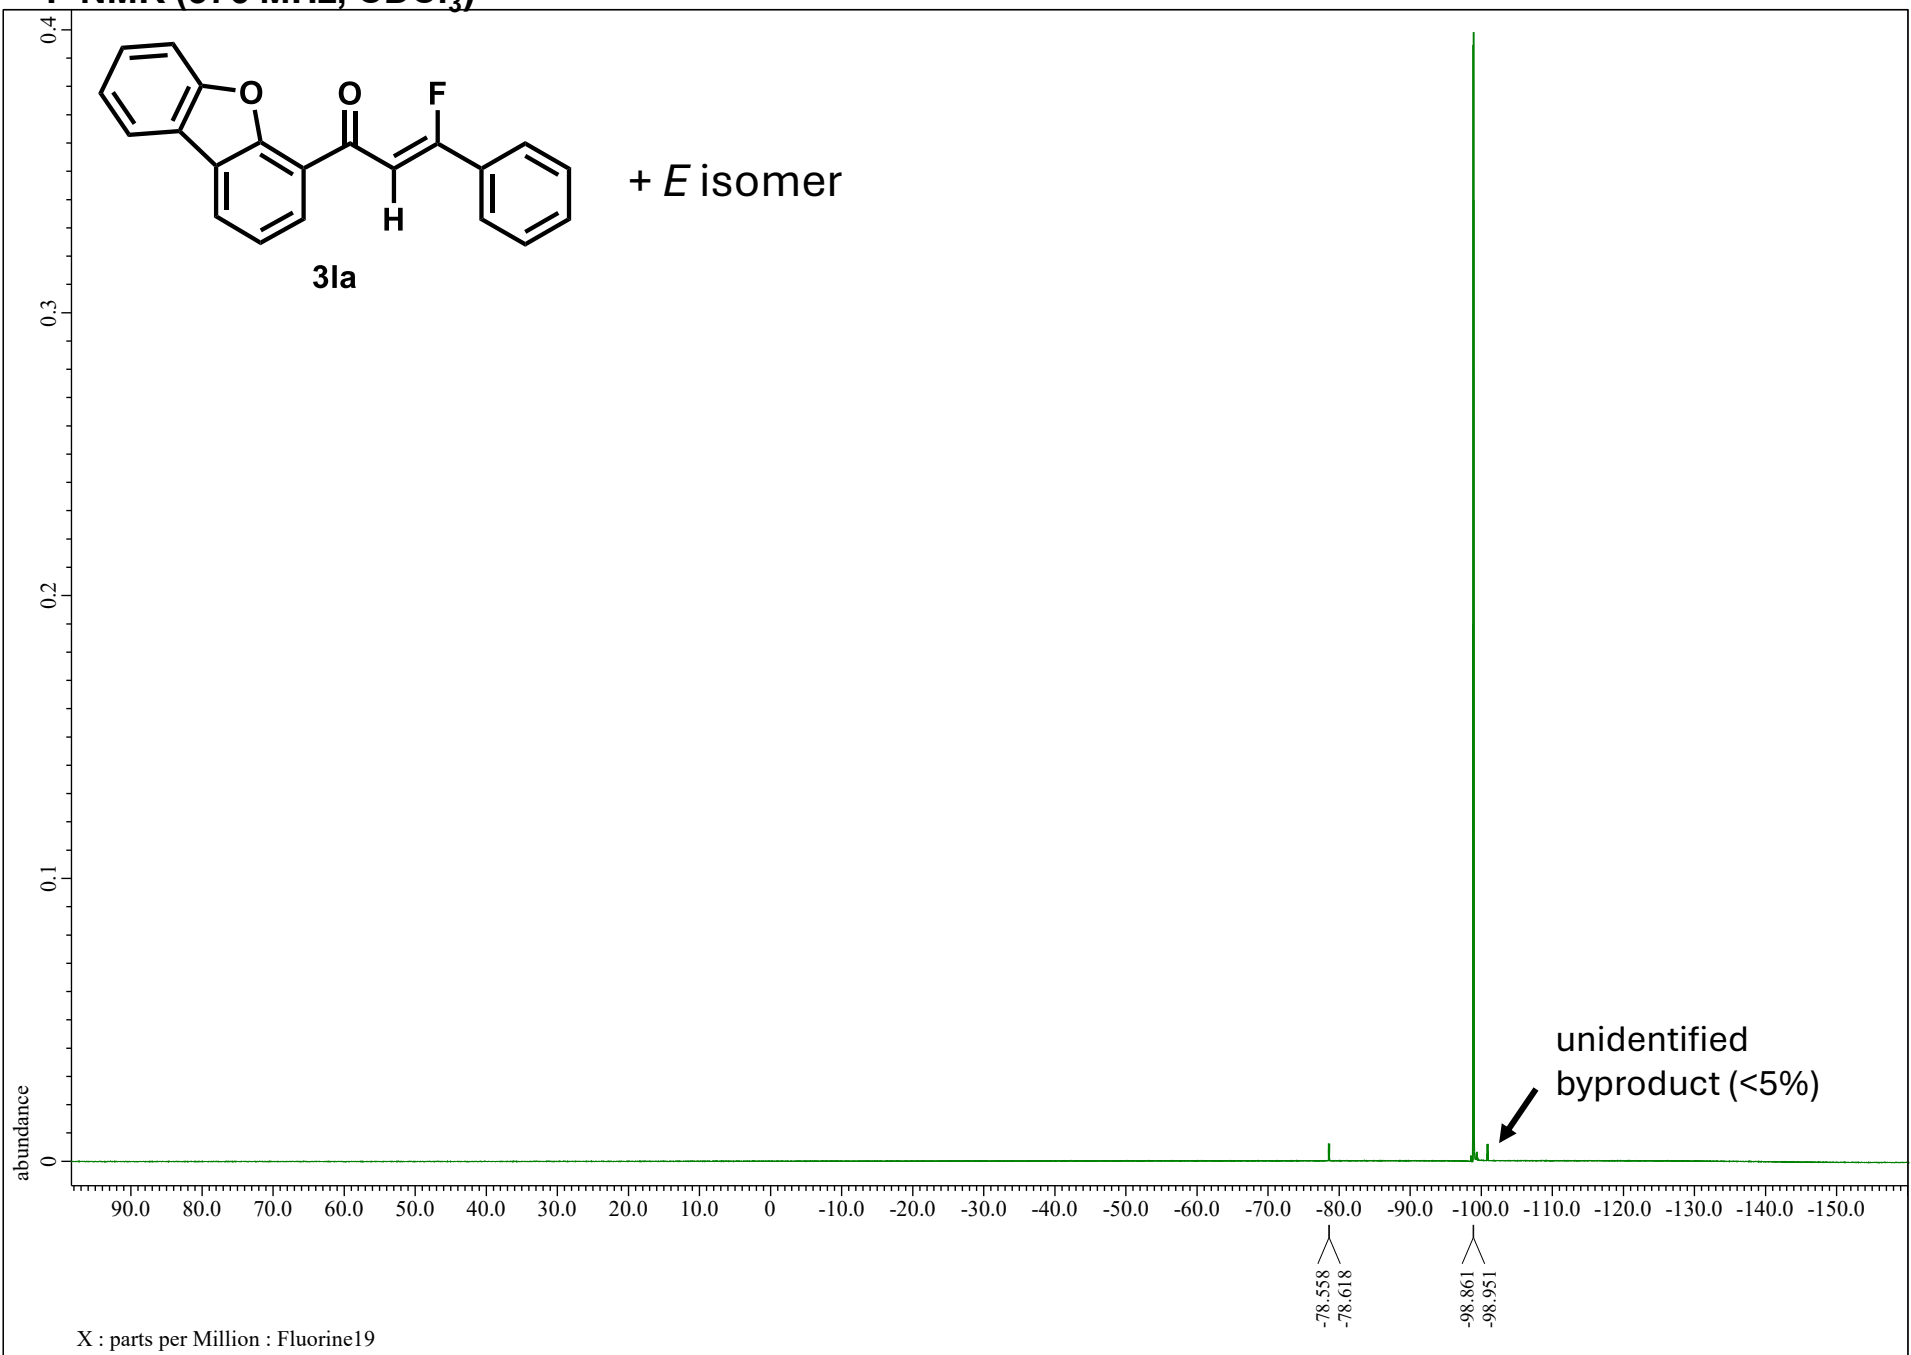

<sup>1</sup>H NMR (400 MHz, CDCl<sub>3</sub>)

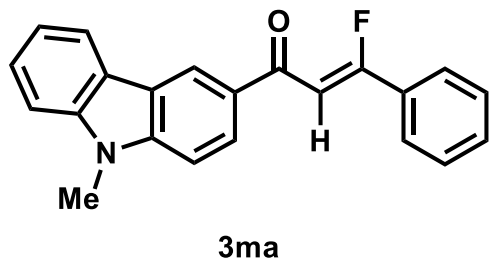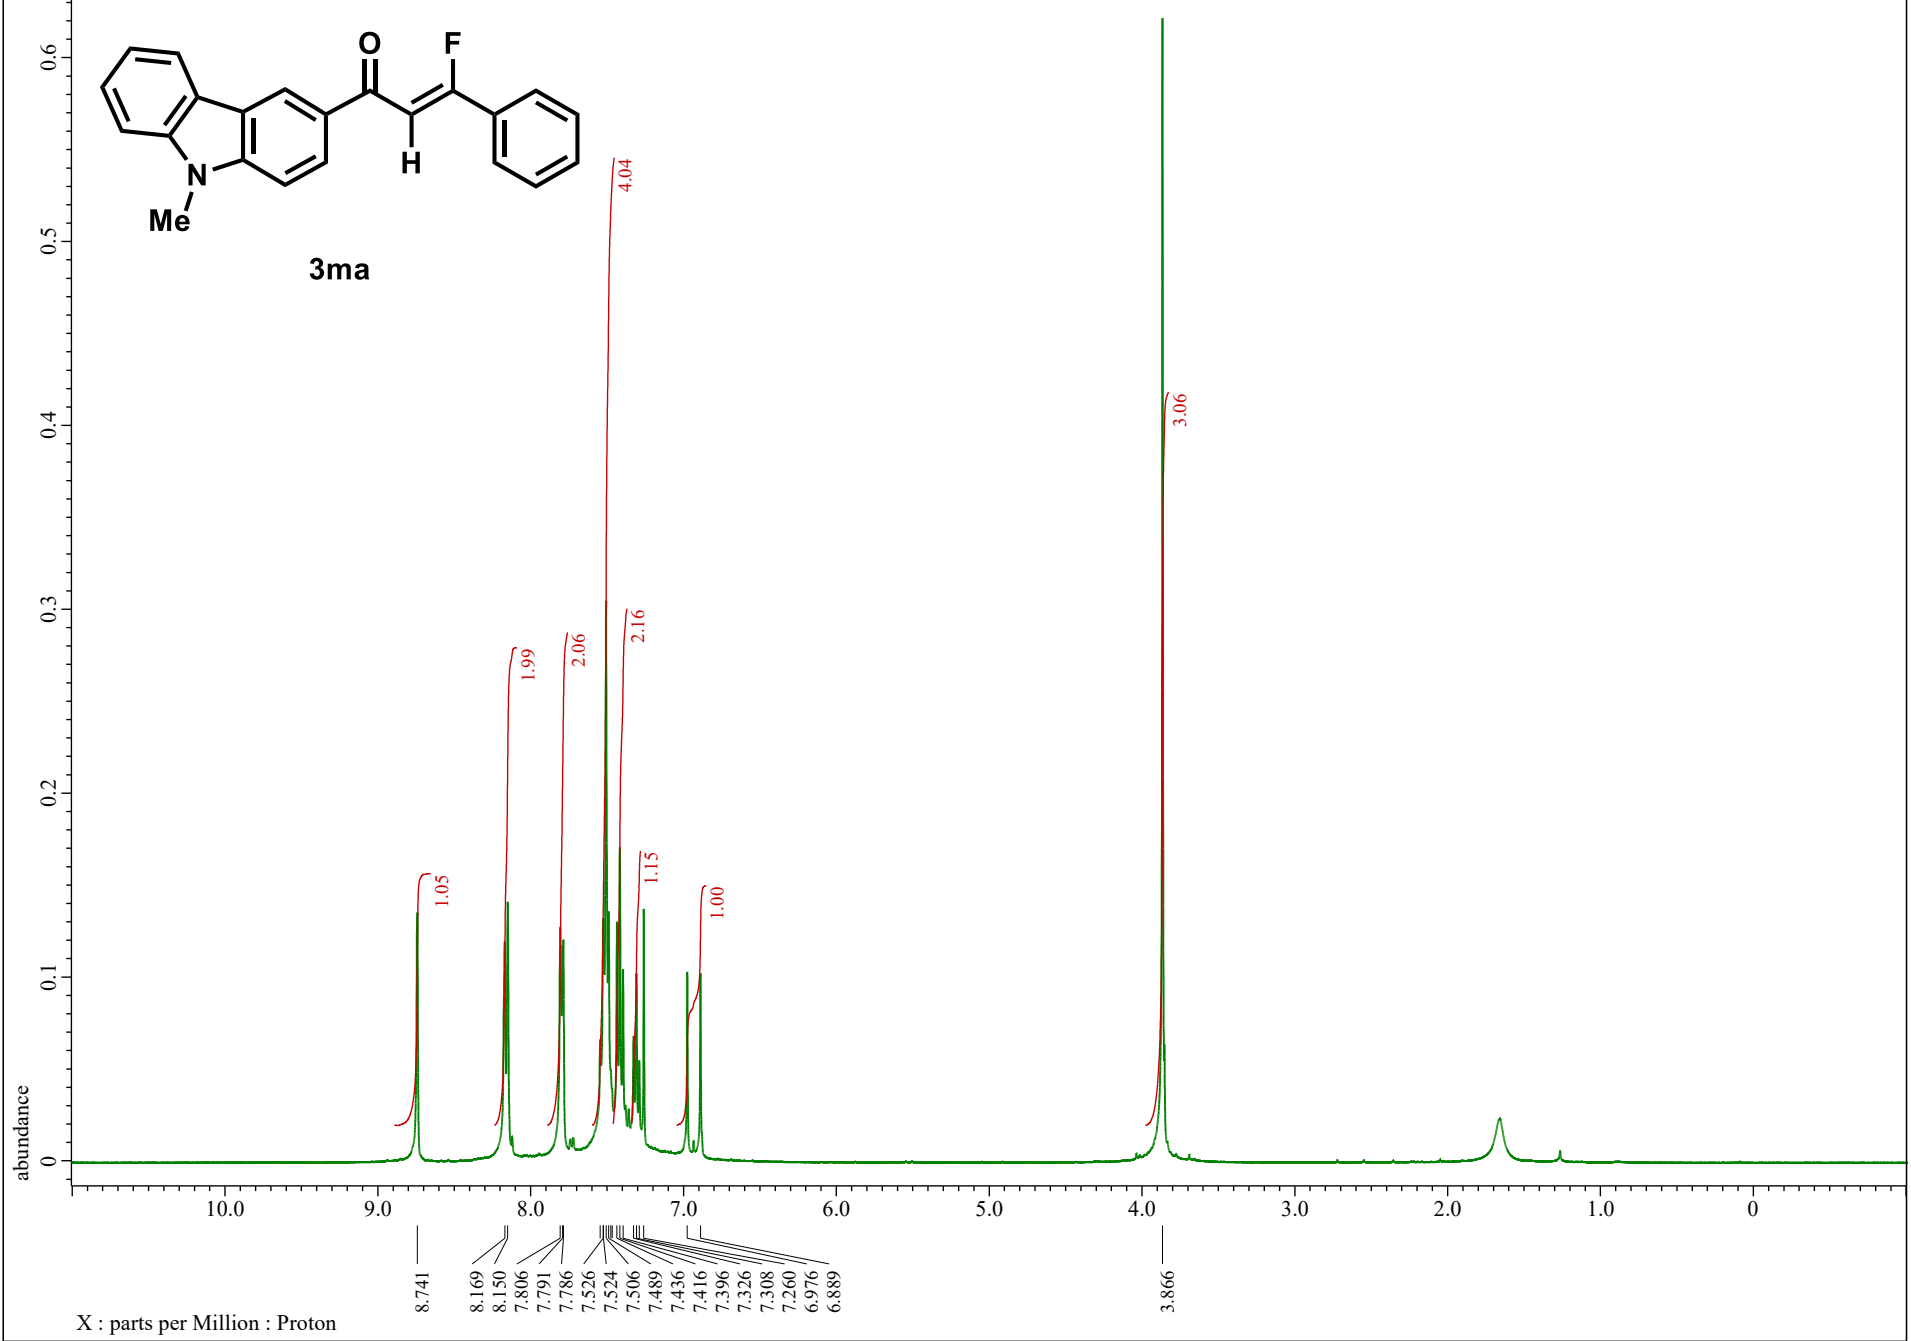

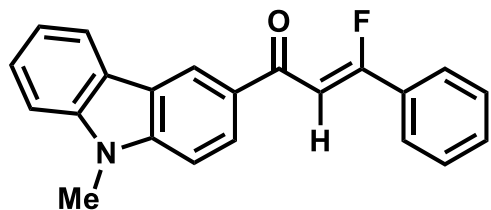

3ma

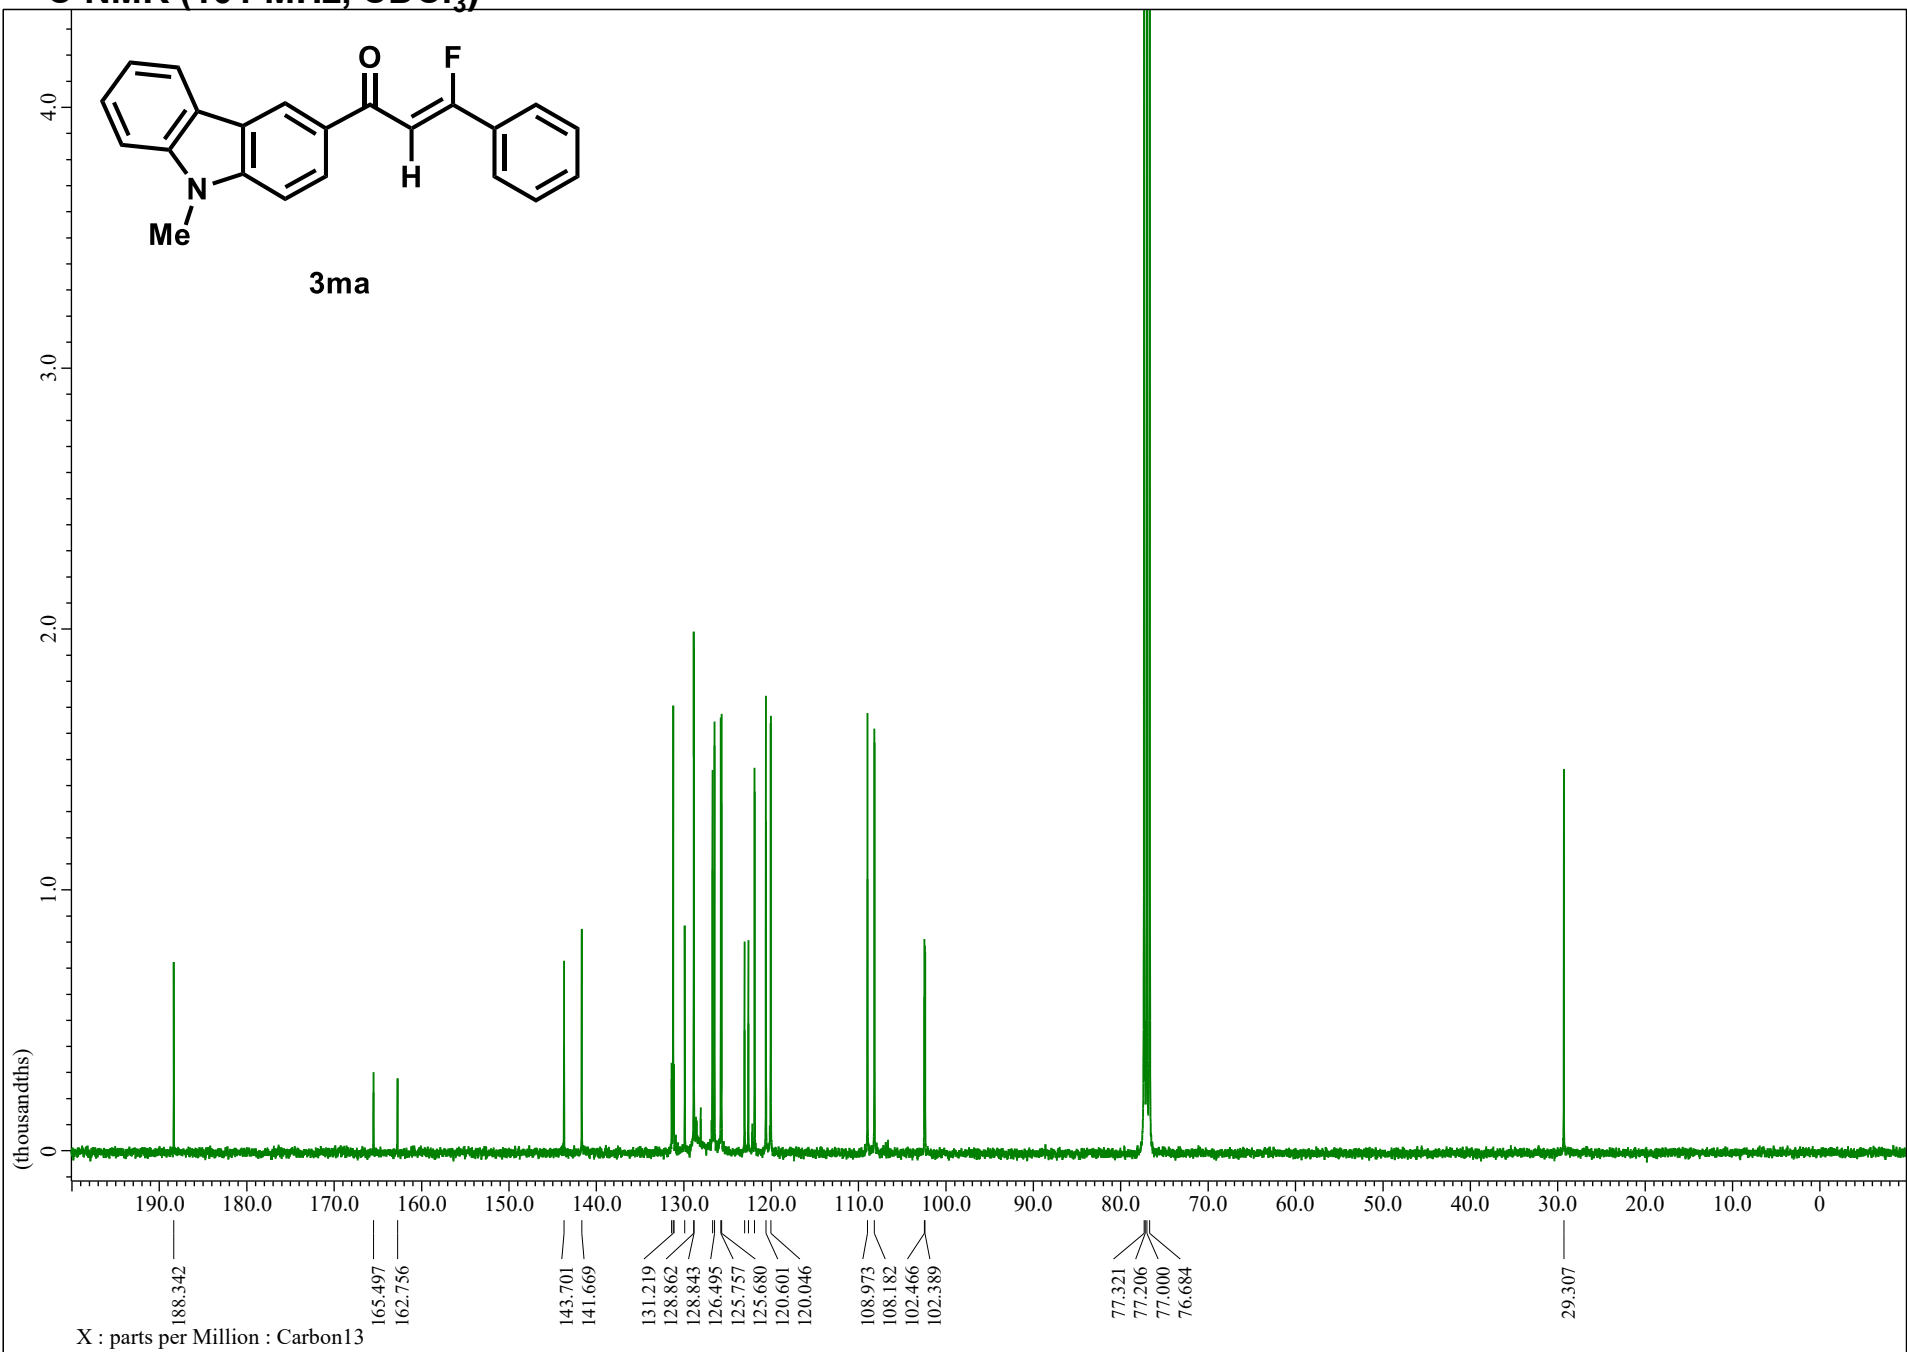

**<sup>19</sup>F NMR (376 MHz, CDCl<sub>3</sub>)**

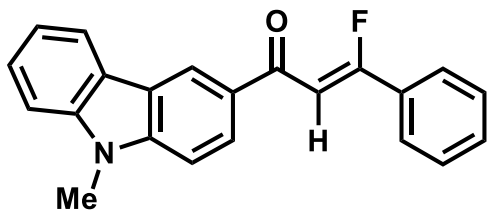

+ *E* isomer

3ma

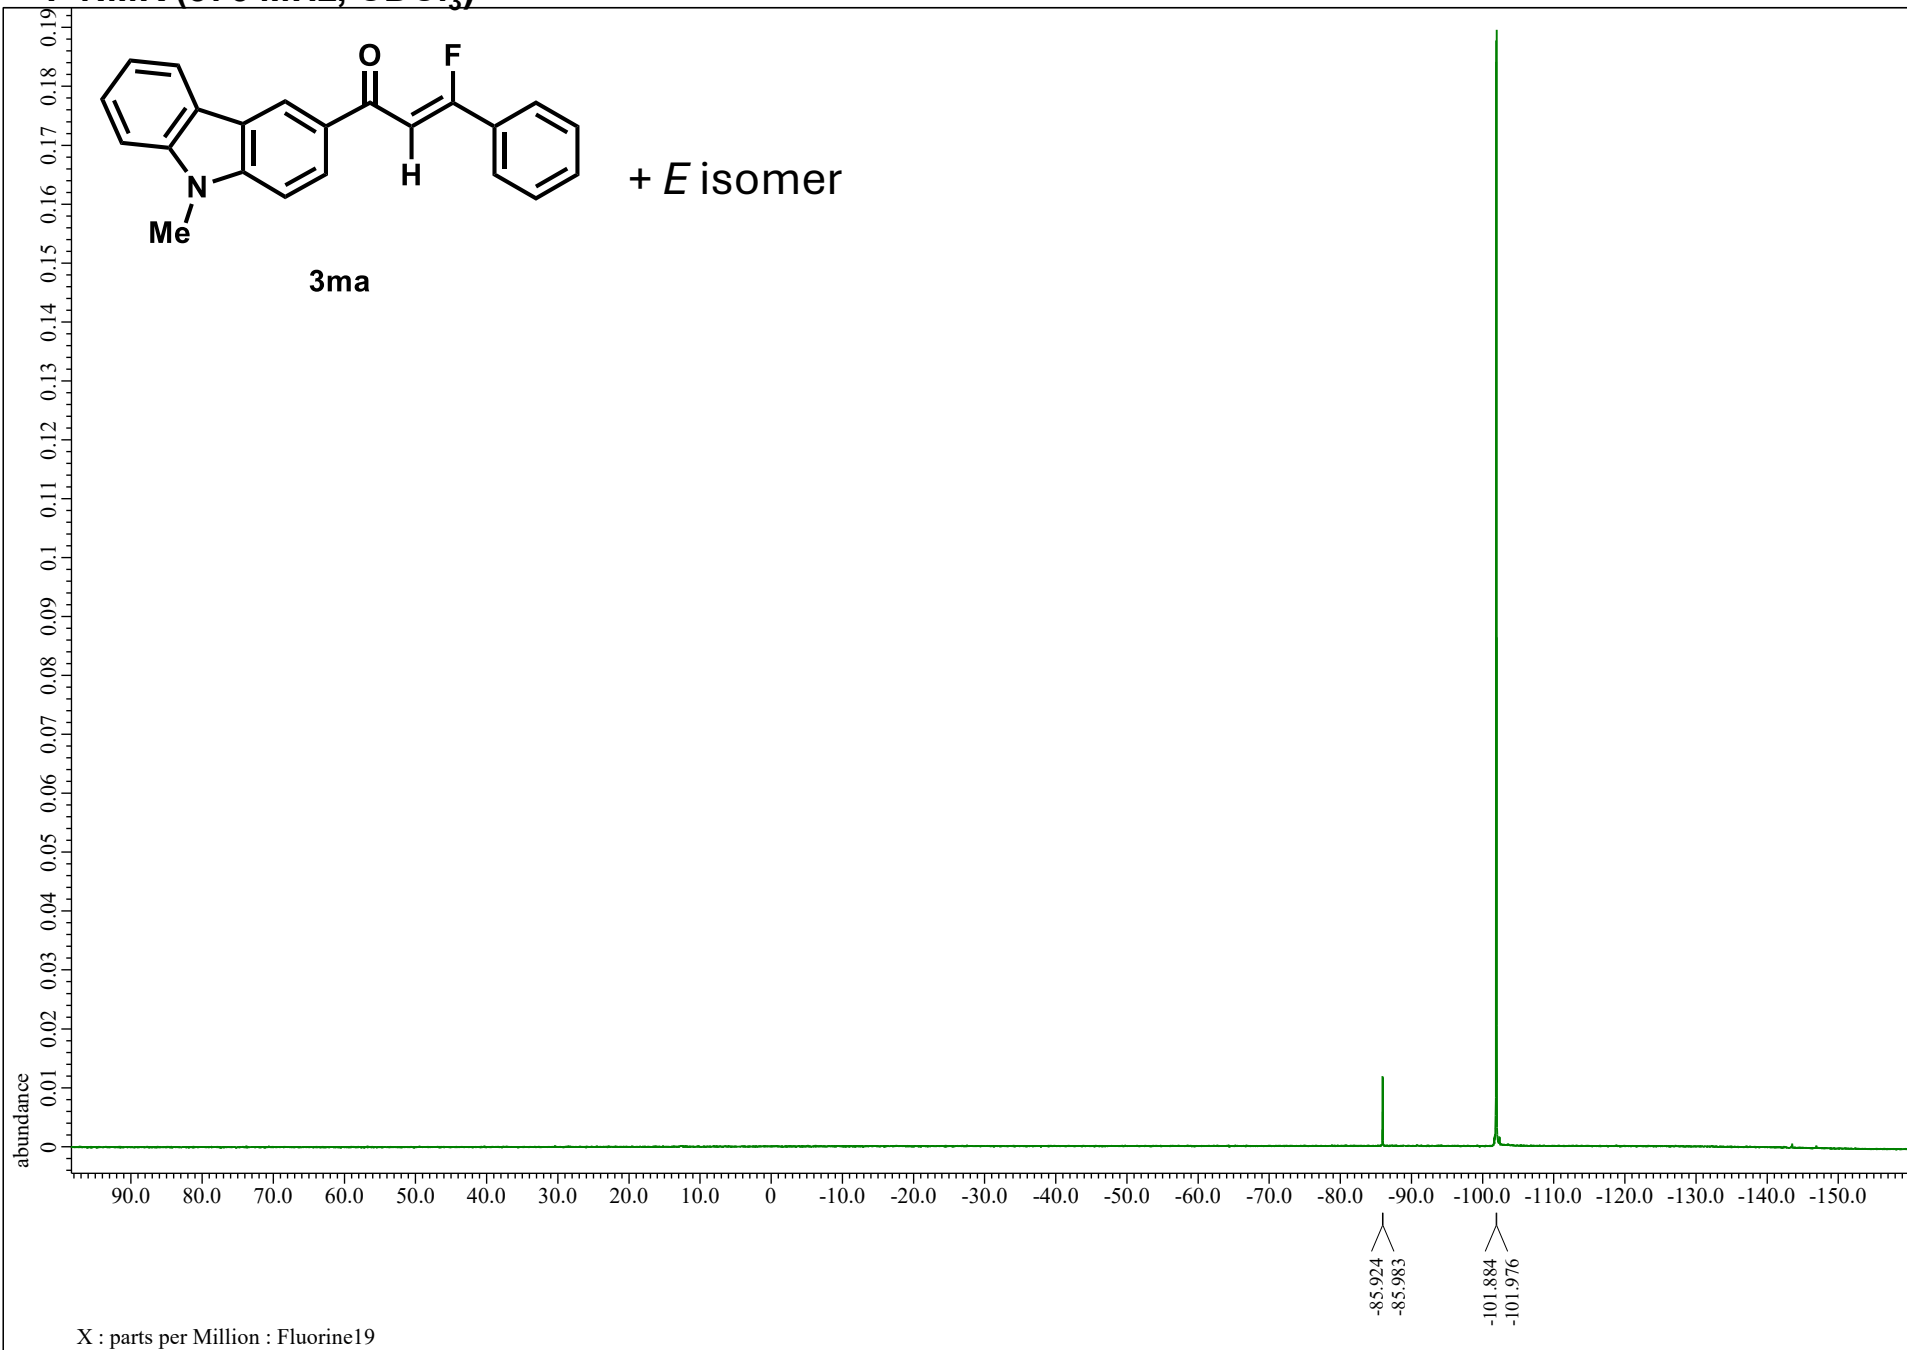

<sup>1</sup>H NMR (400 MHz, CDCl<sub>3</sub>)

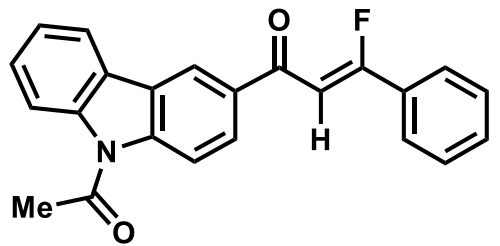

3na

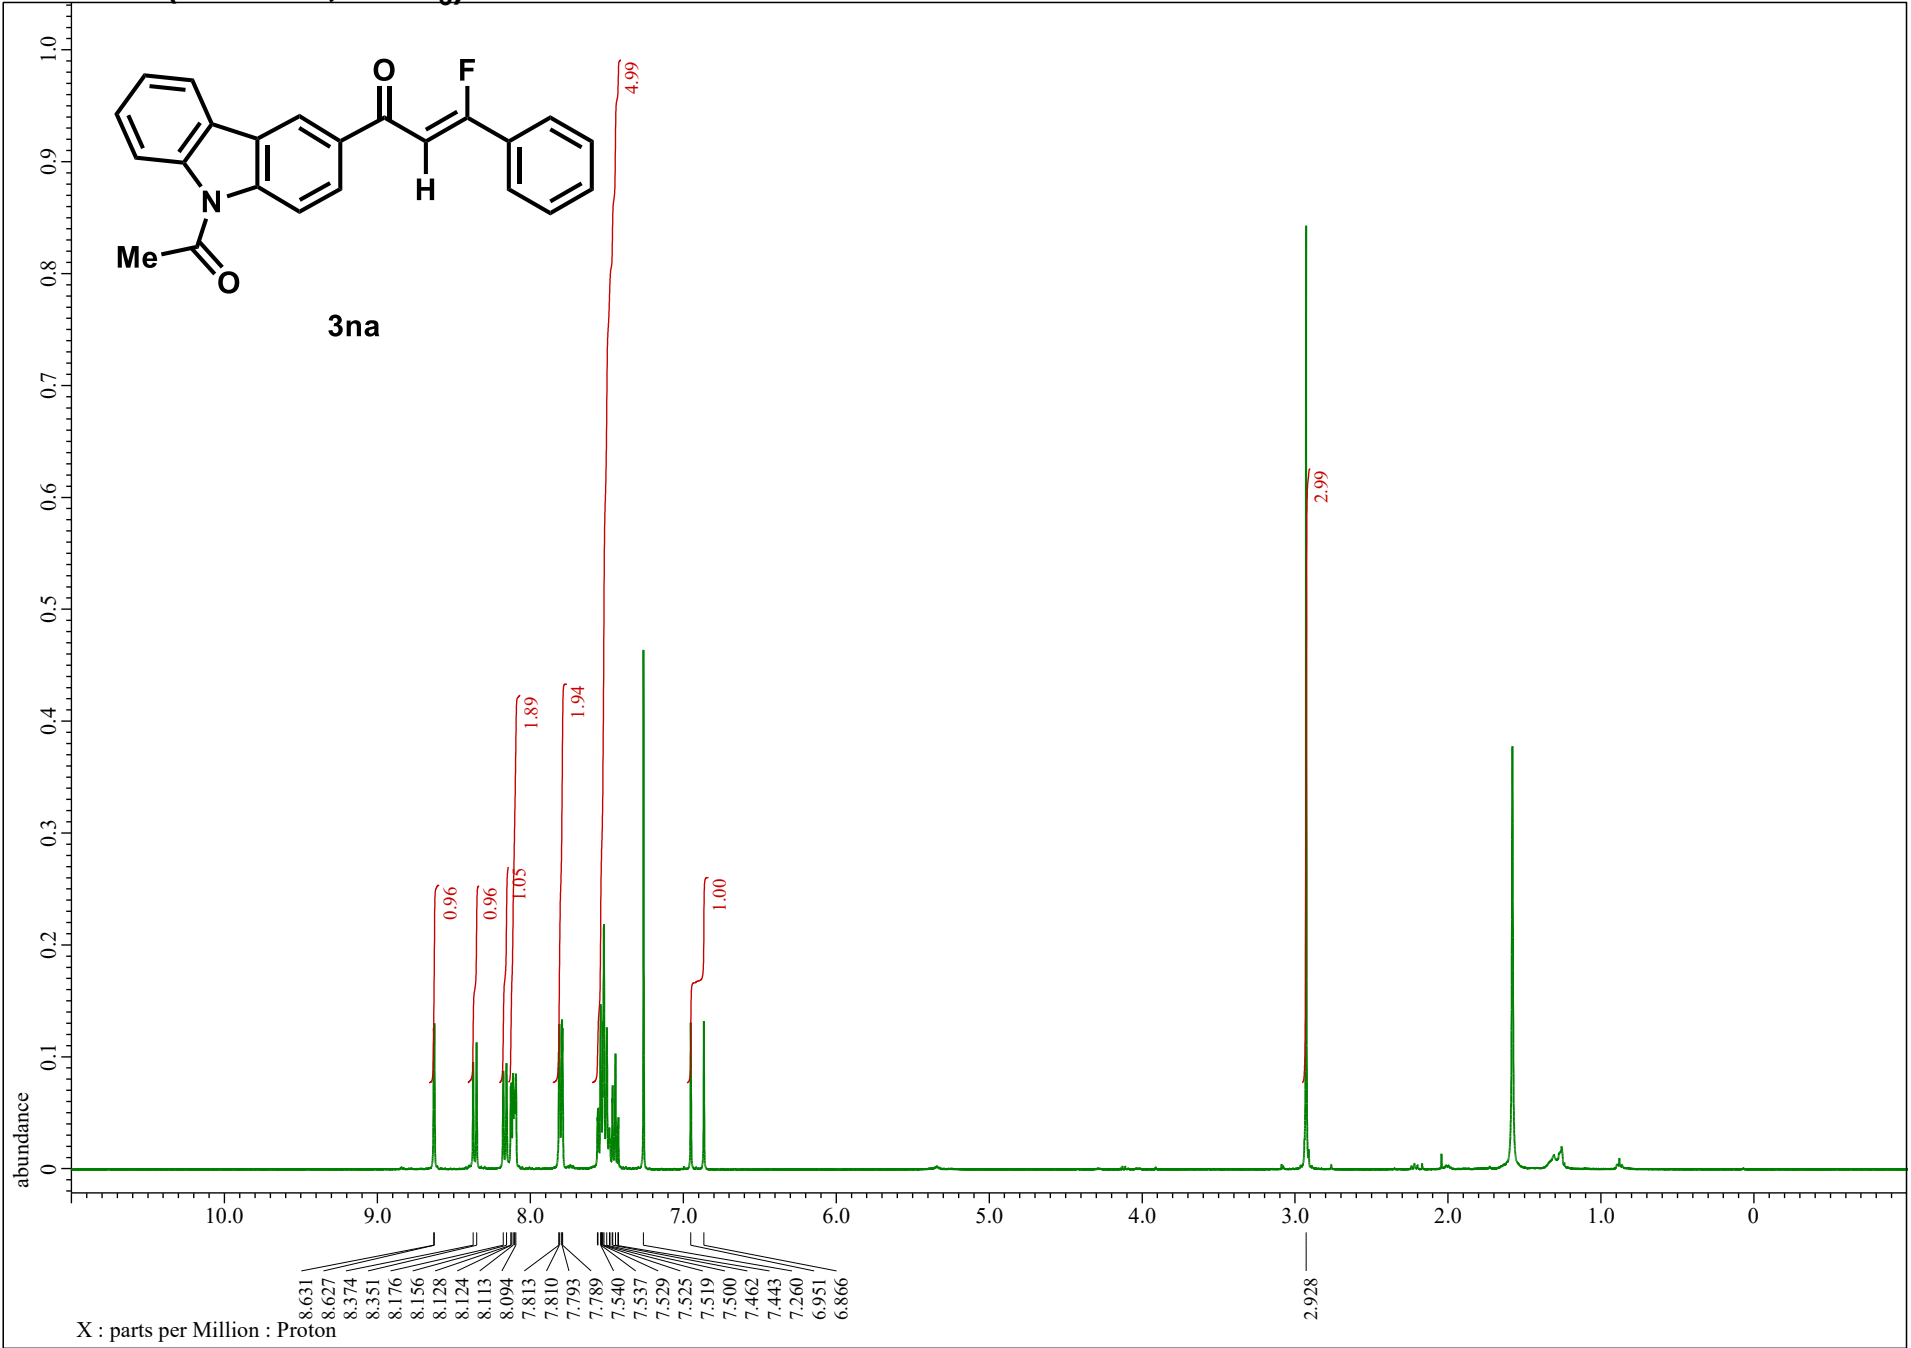

X : parts per Million : Proton

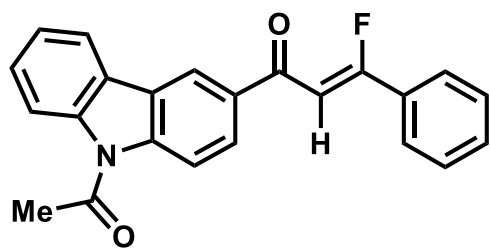

3na

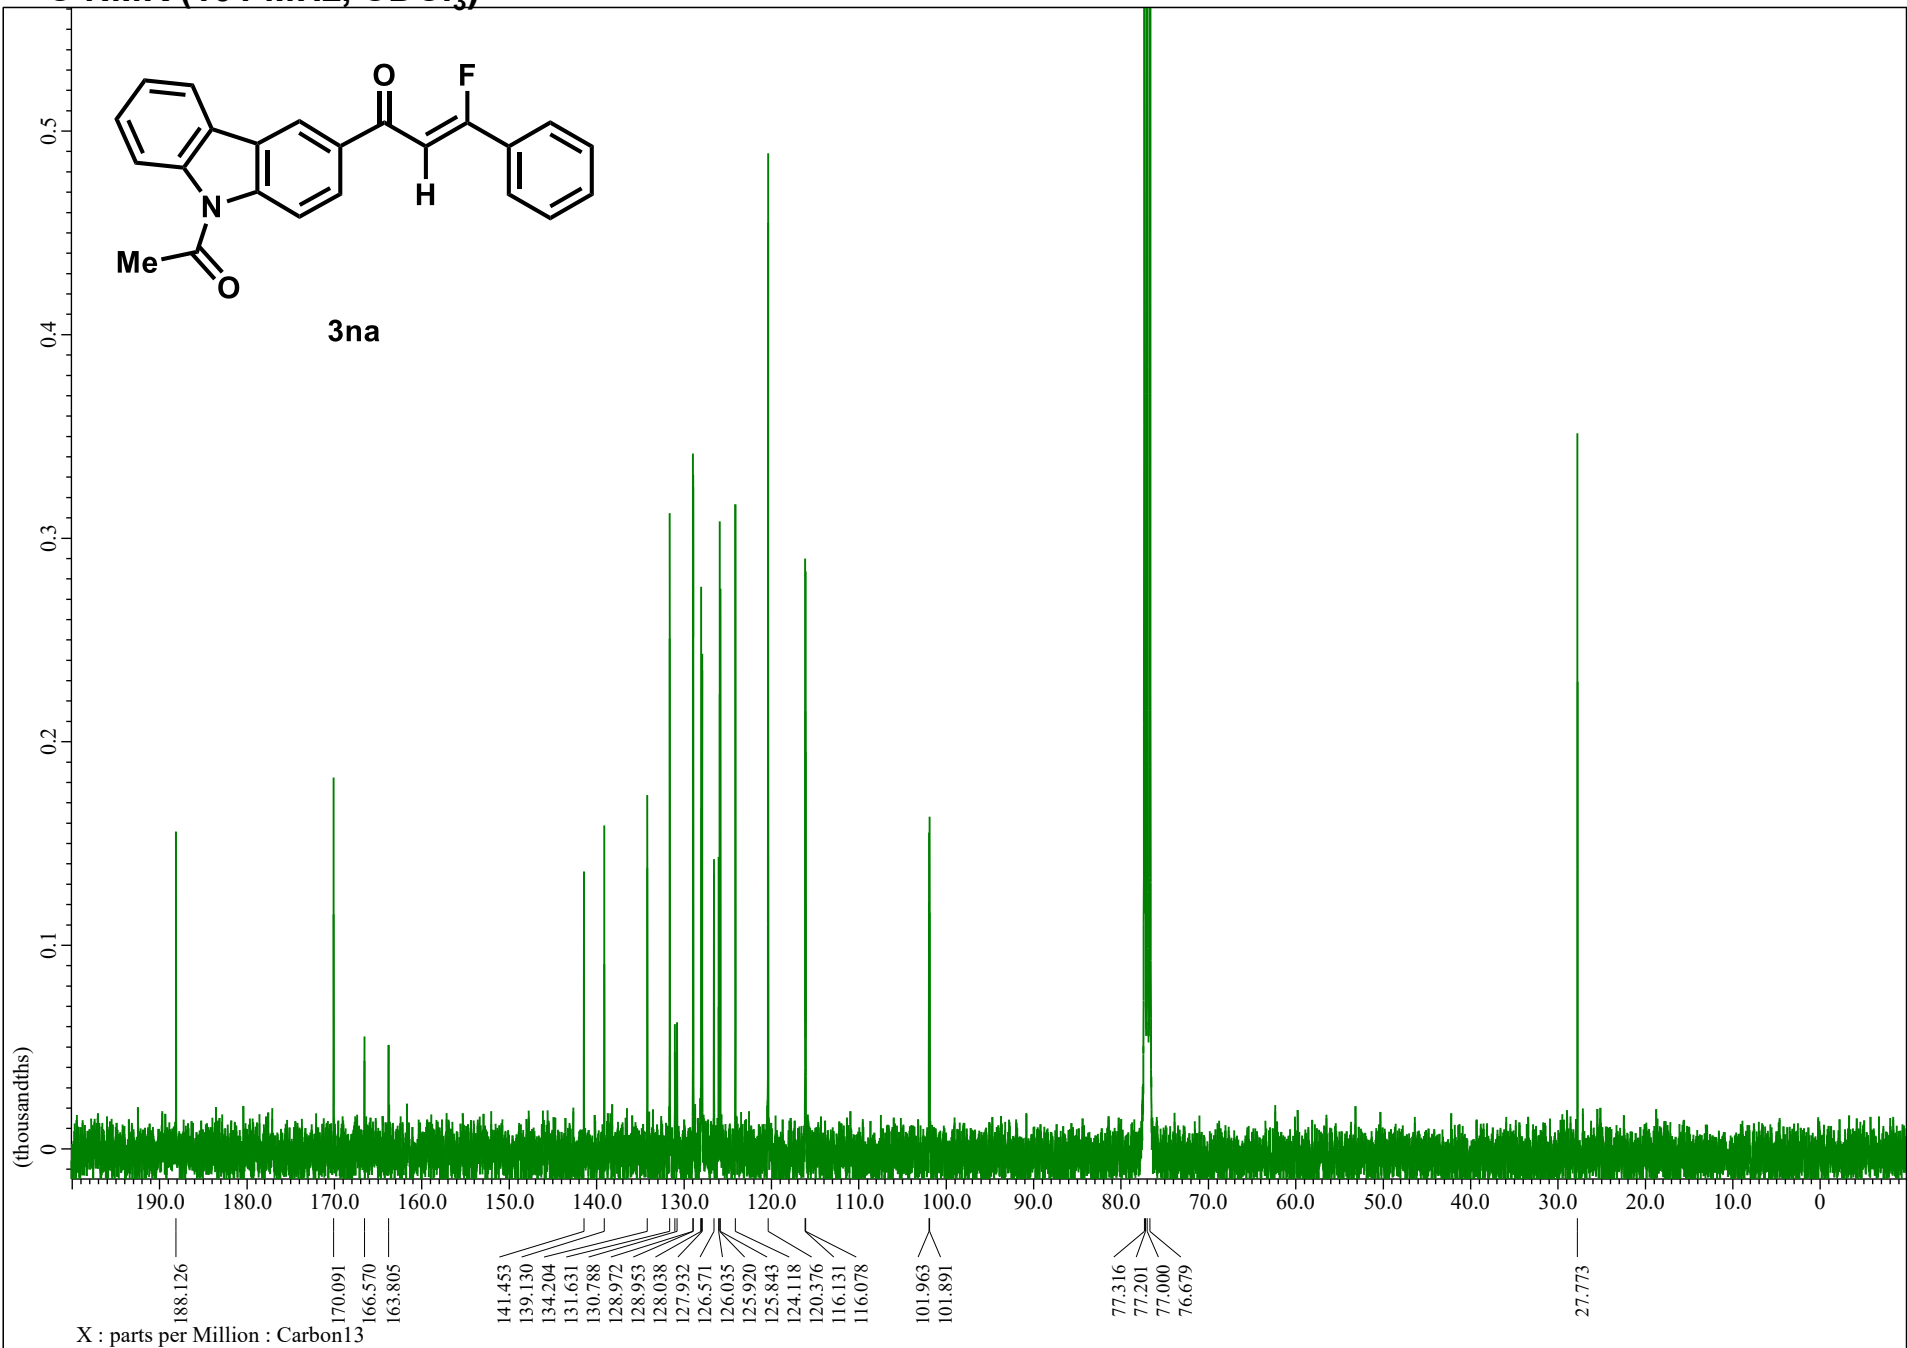

**$^{19}\text{F}$  NMR (376 MHz,  $\text{CDCl}_3$ )**

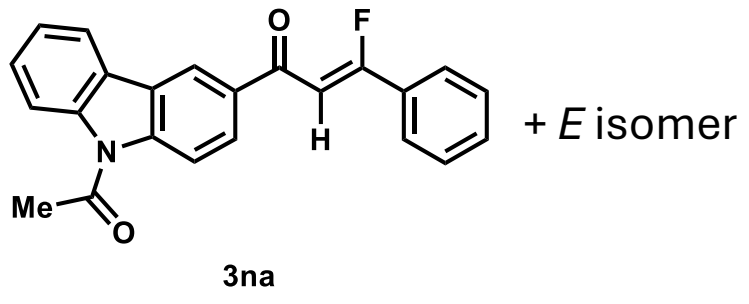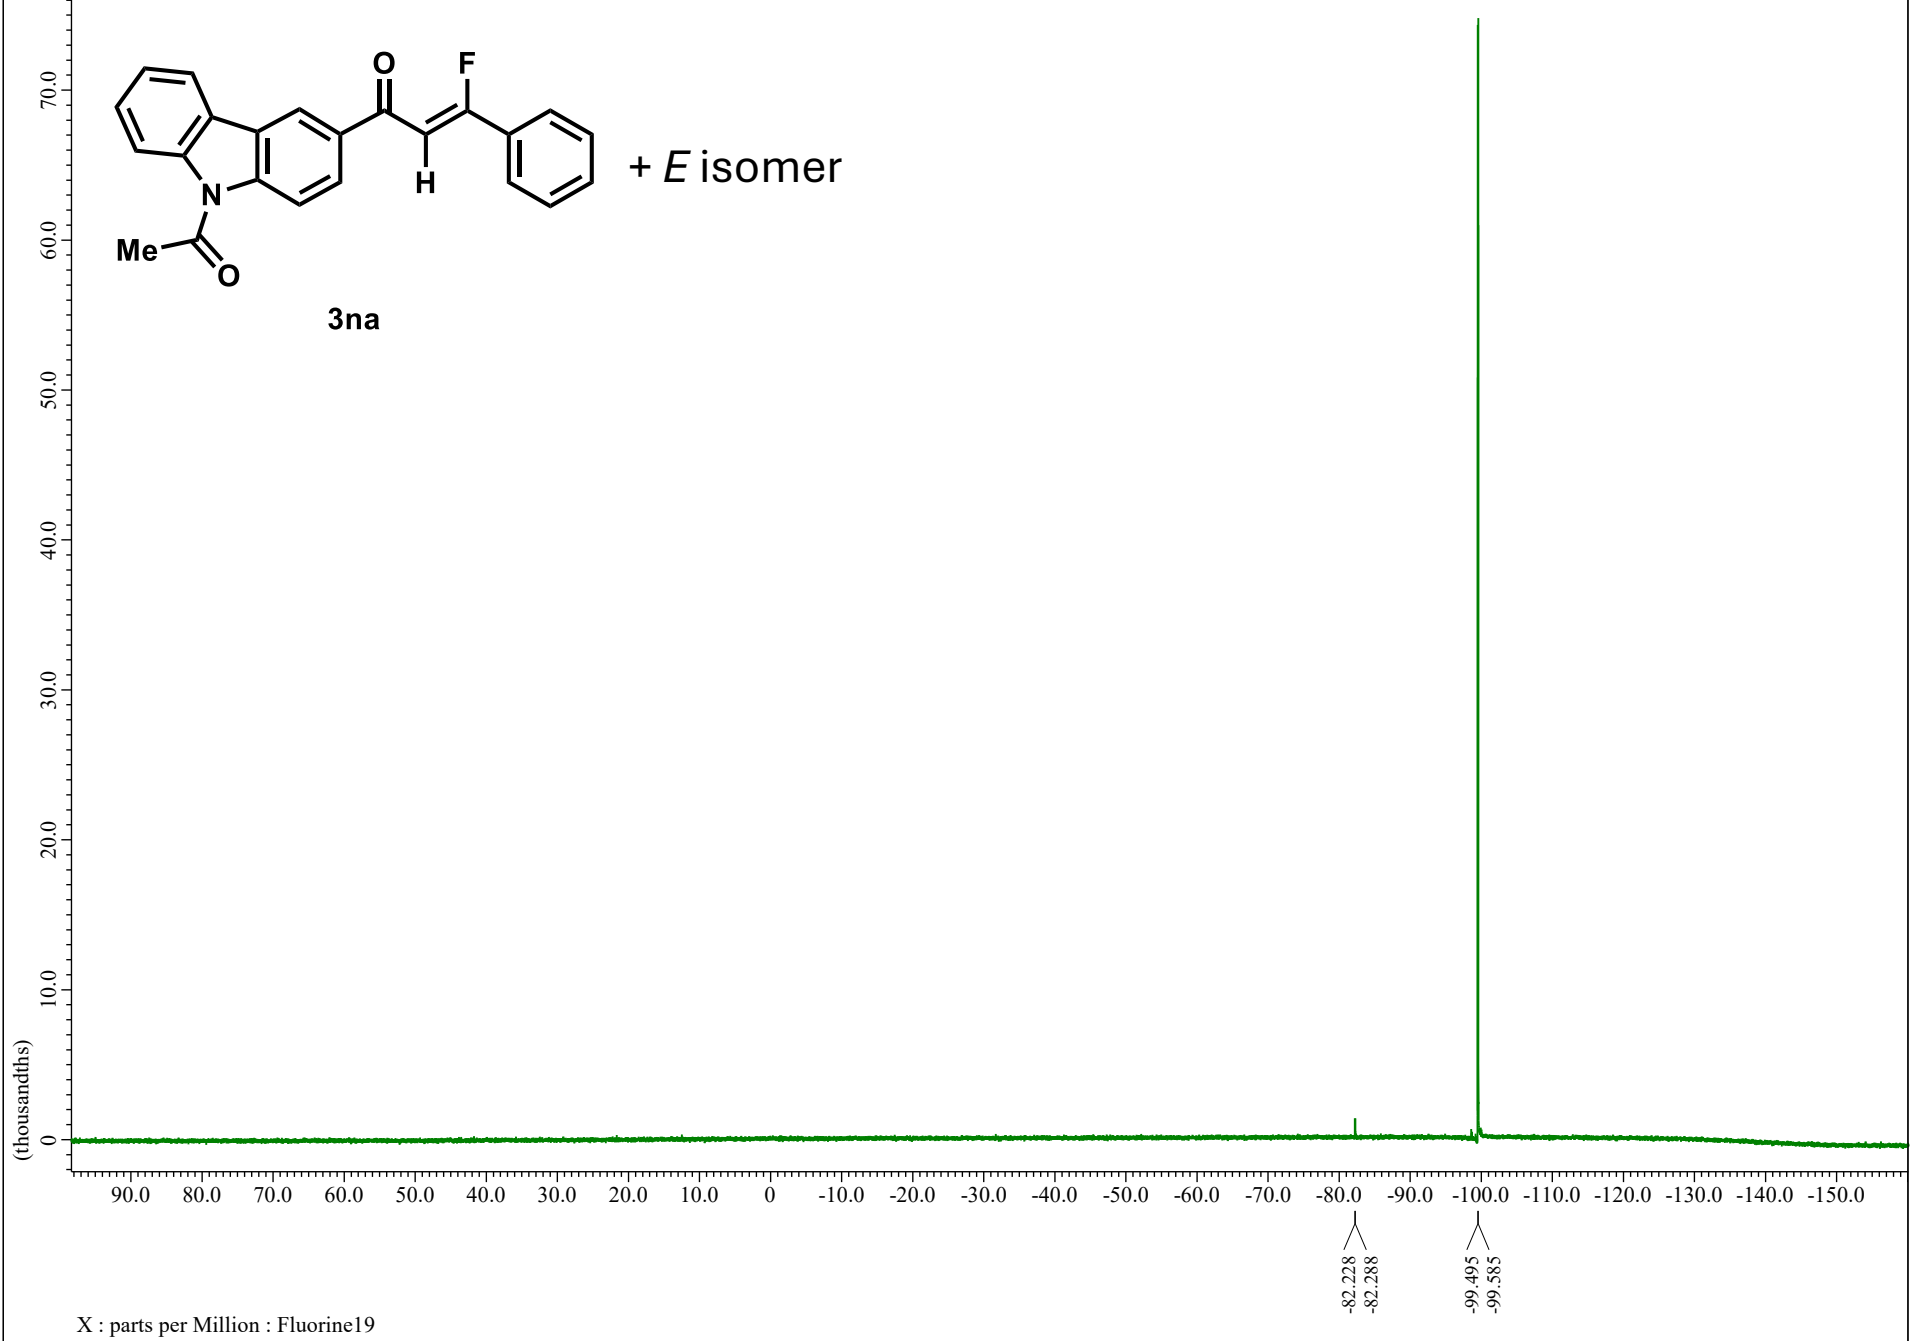

X : parts per Million : Fluorine19

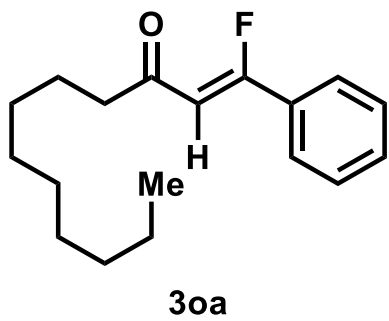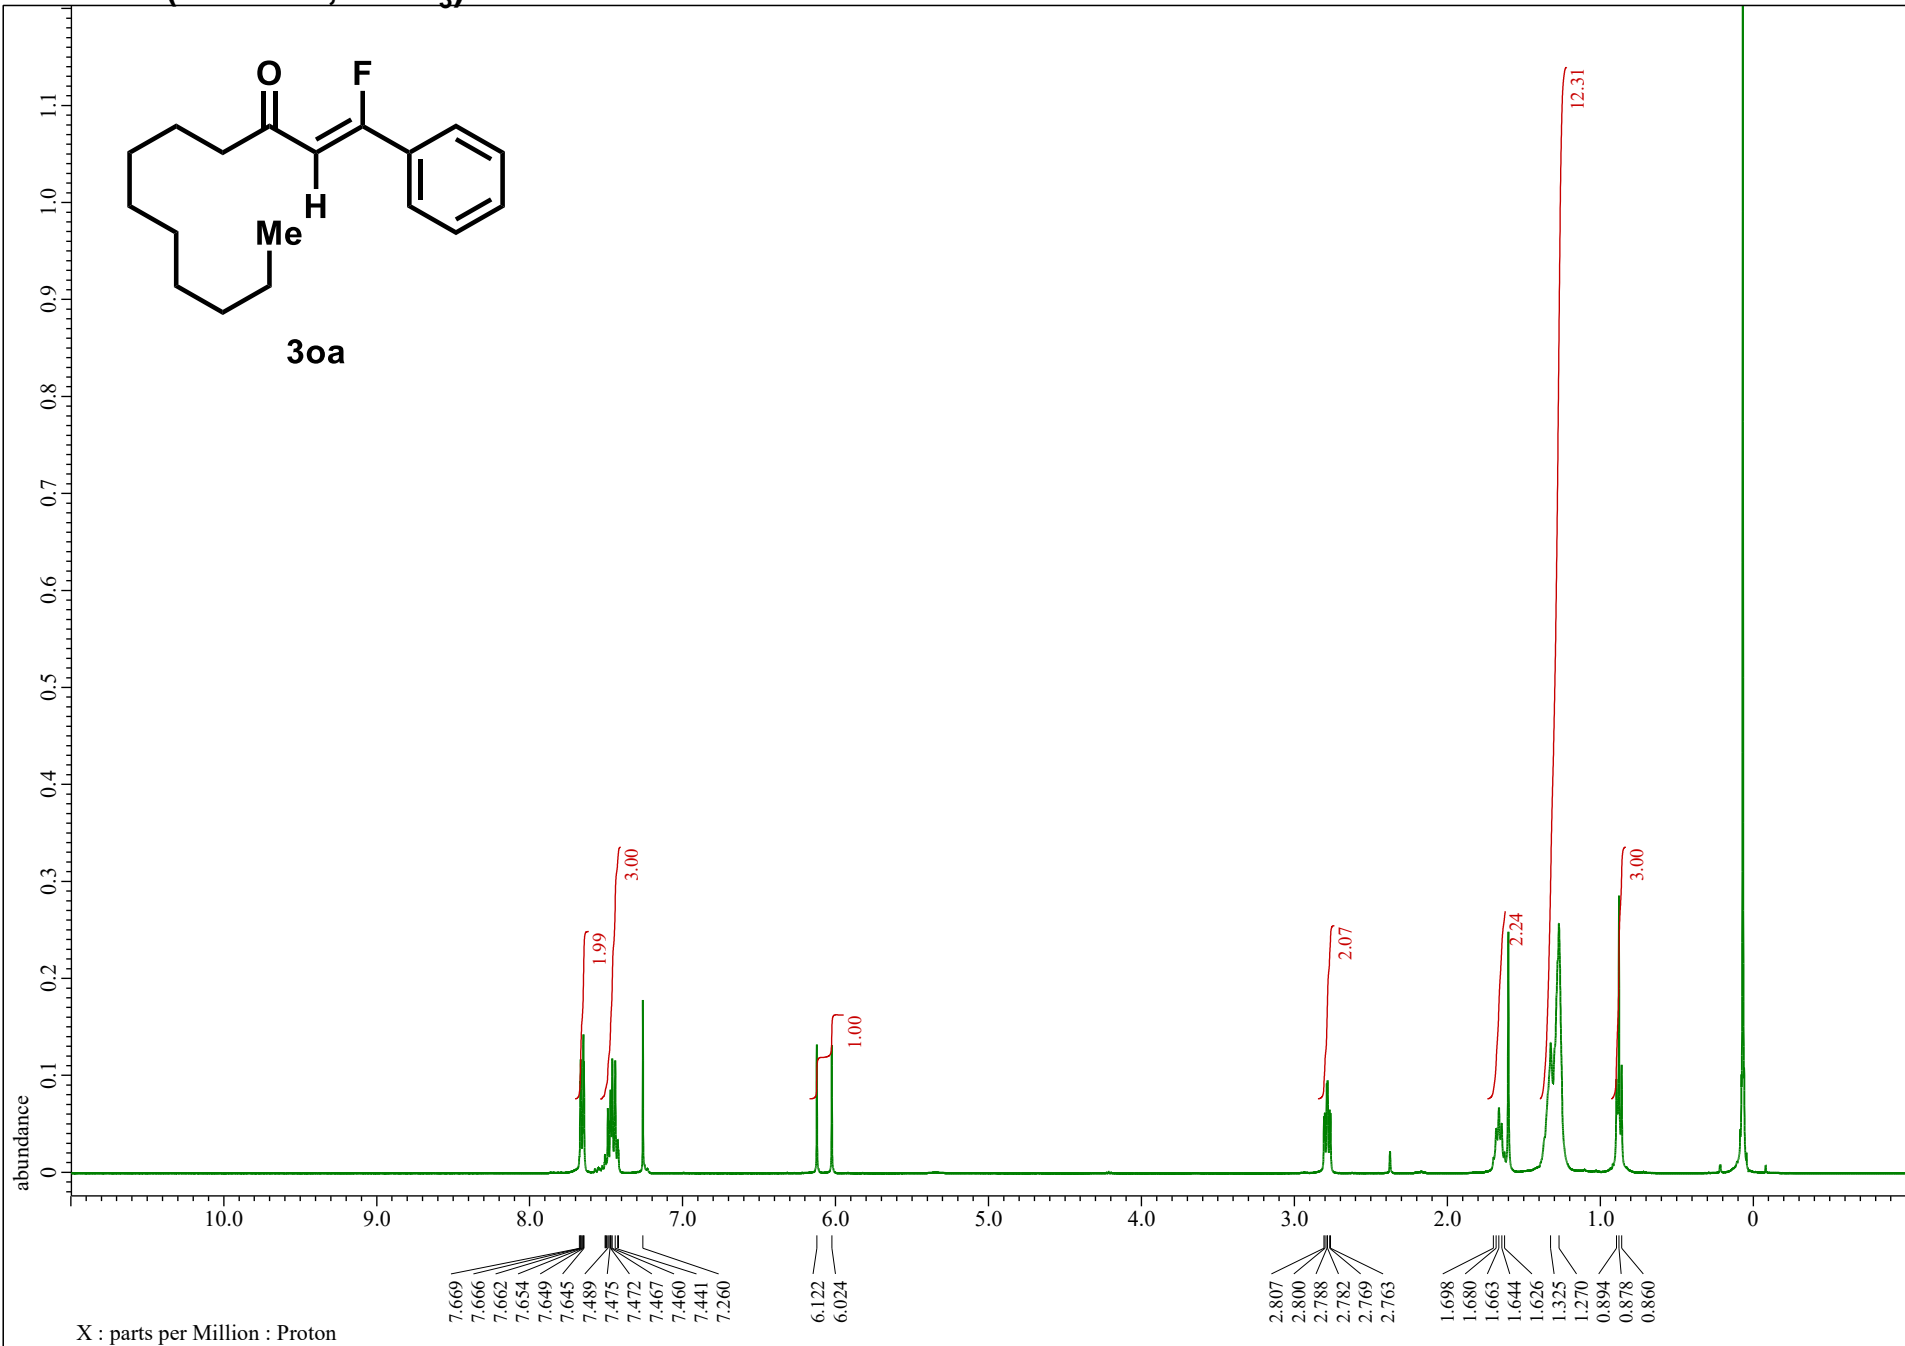

<sup>13</sup>C NMR (101 MHz, CDCl<sub>3</sub>)

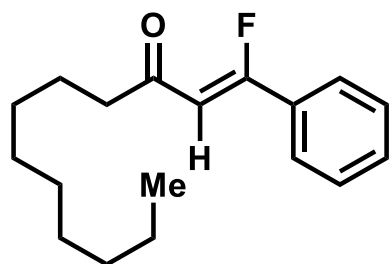

3oa

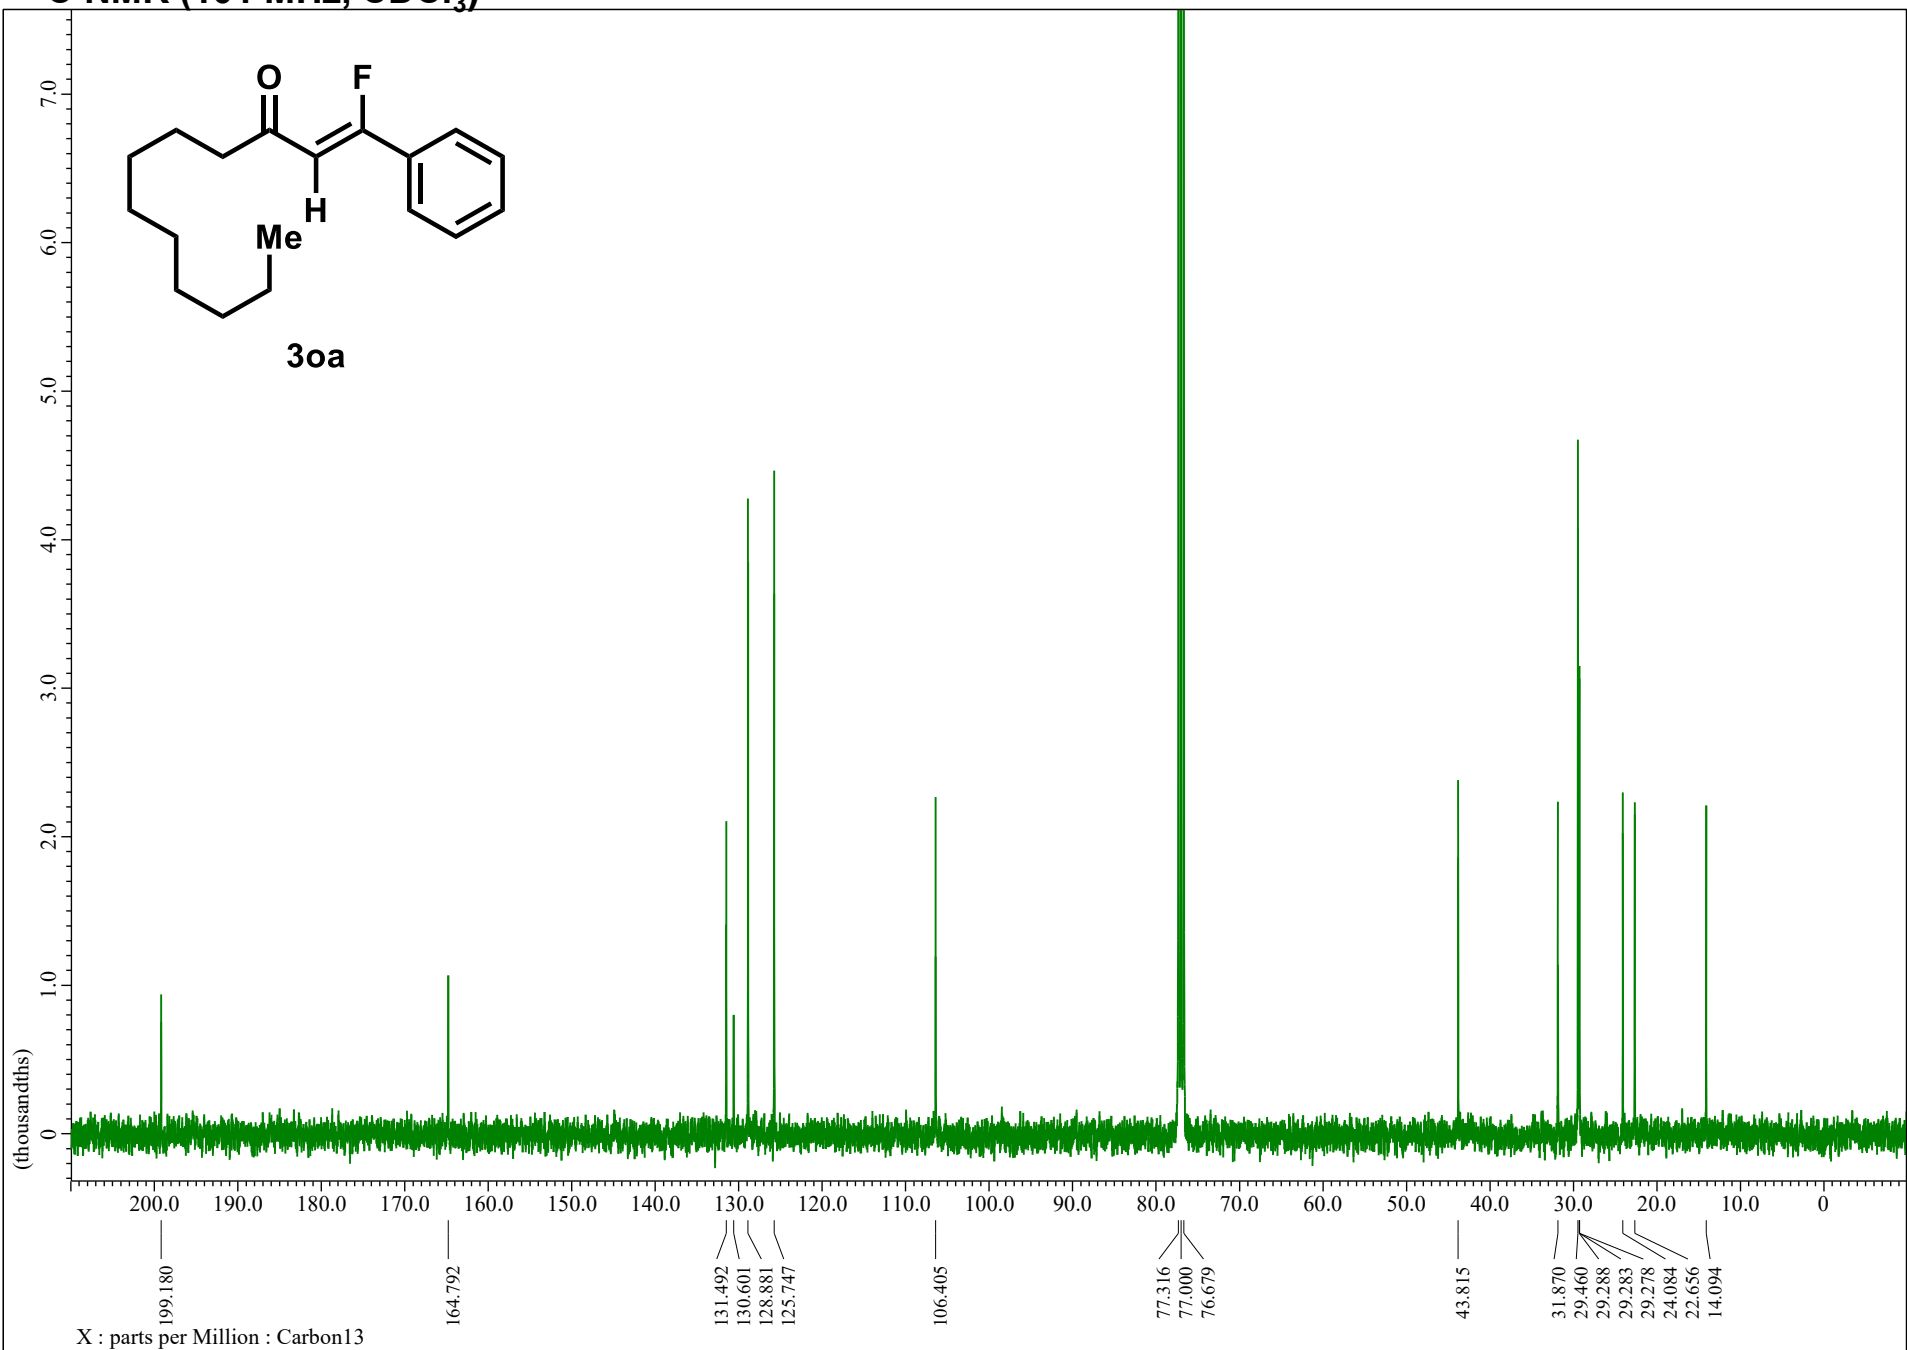

**$^{19}\text{F}$  NMR (376 MHz,  $\text{CDCl}_3$ )**

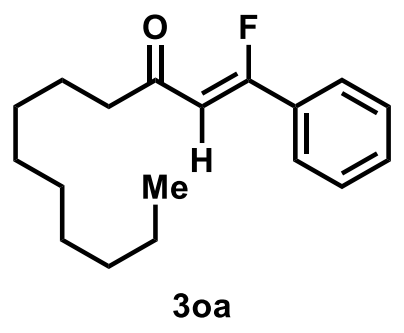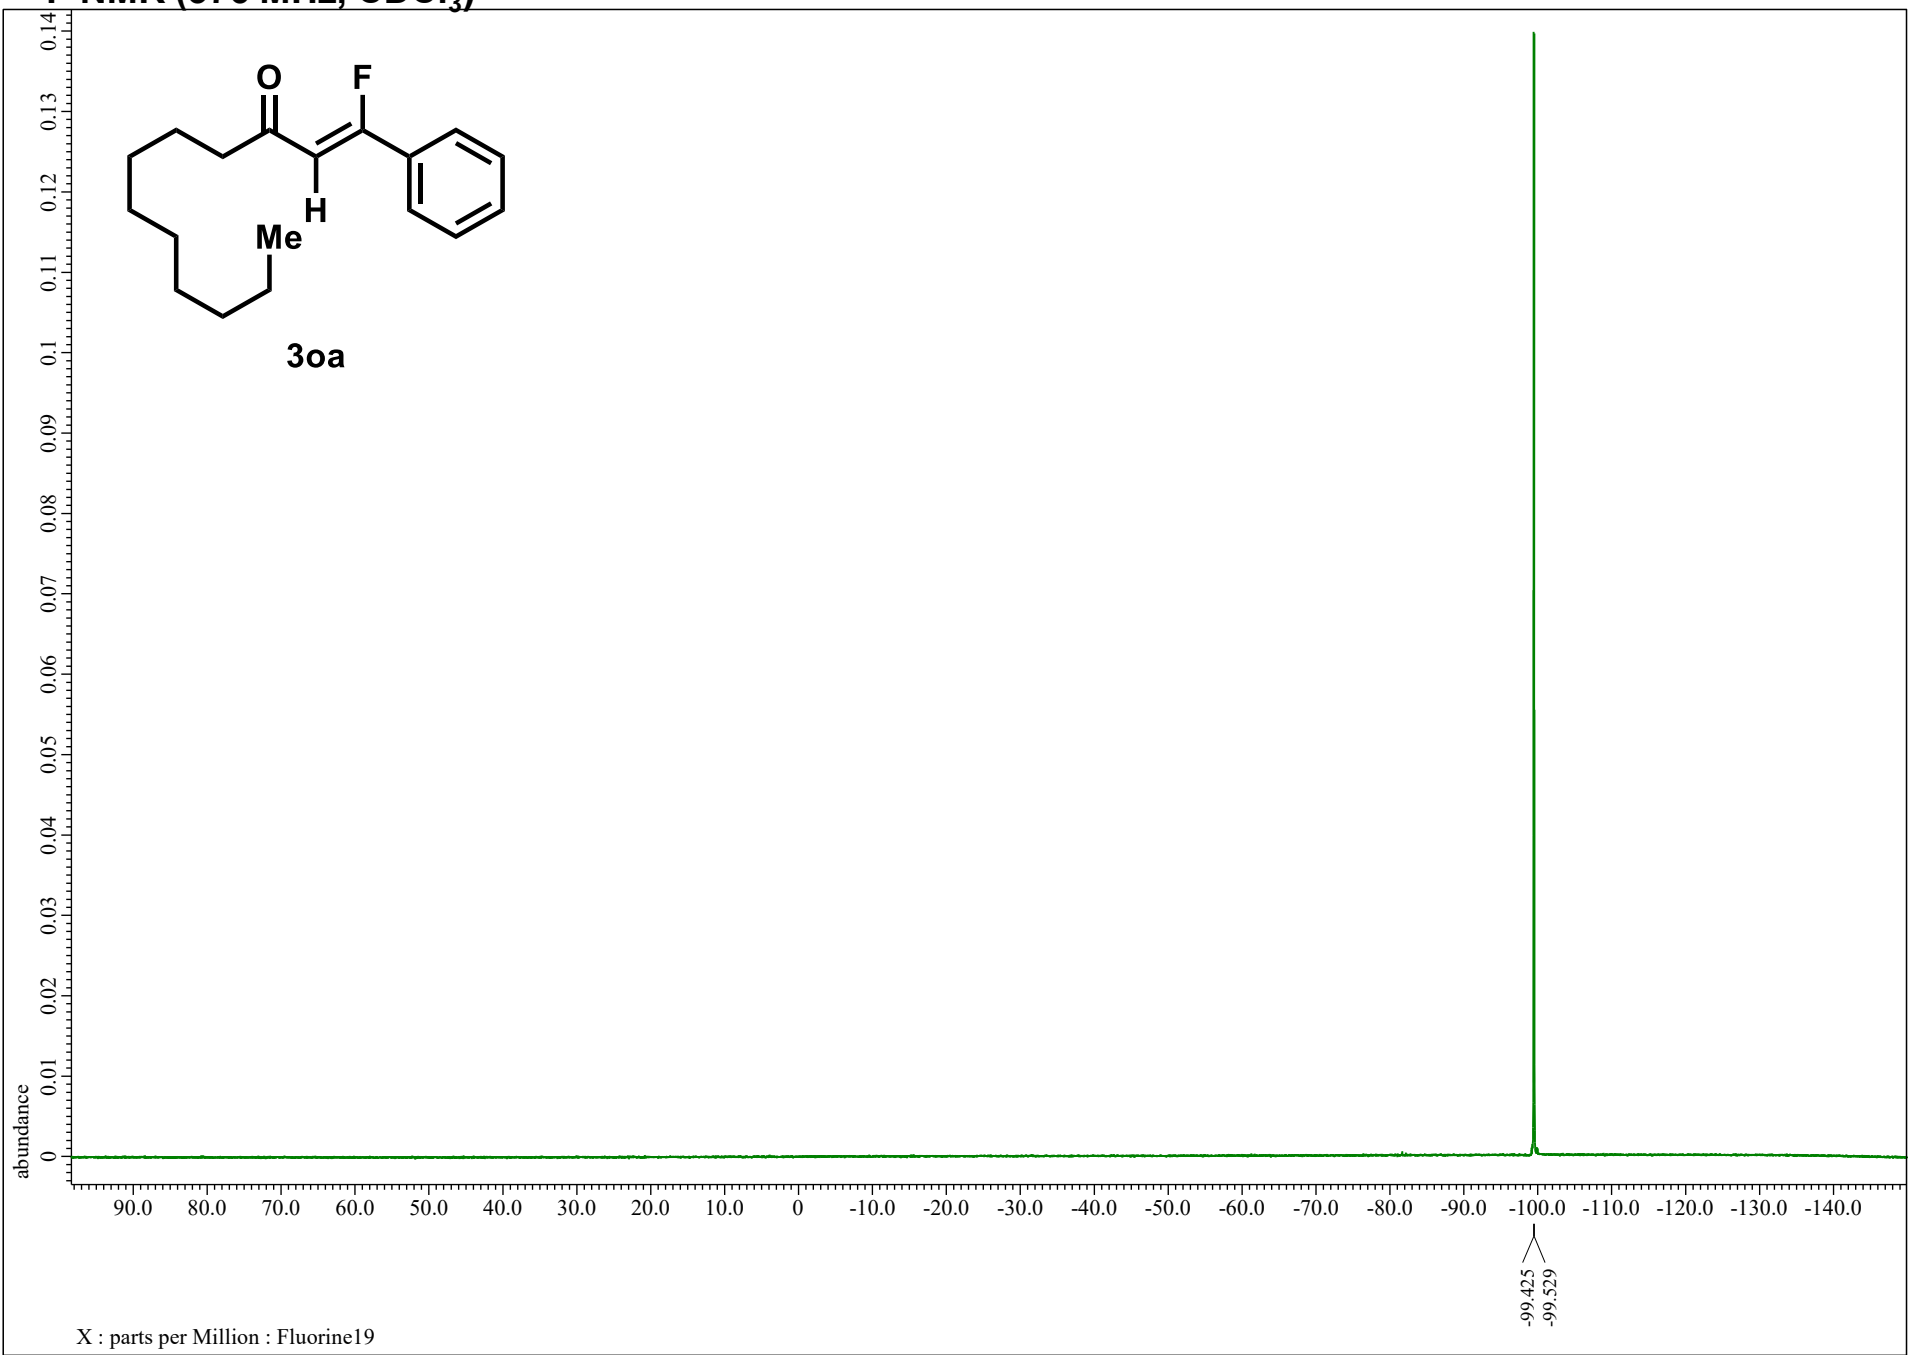

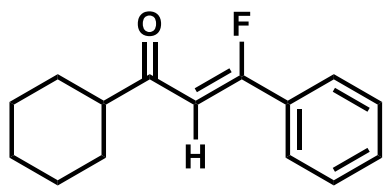

3pa

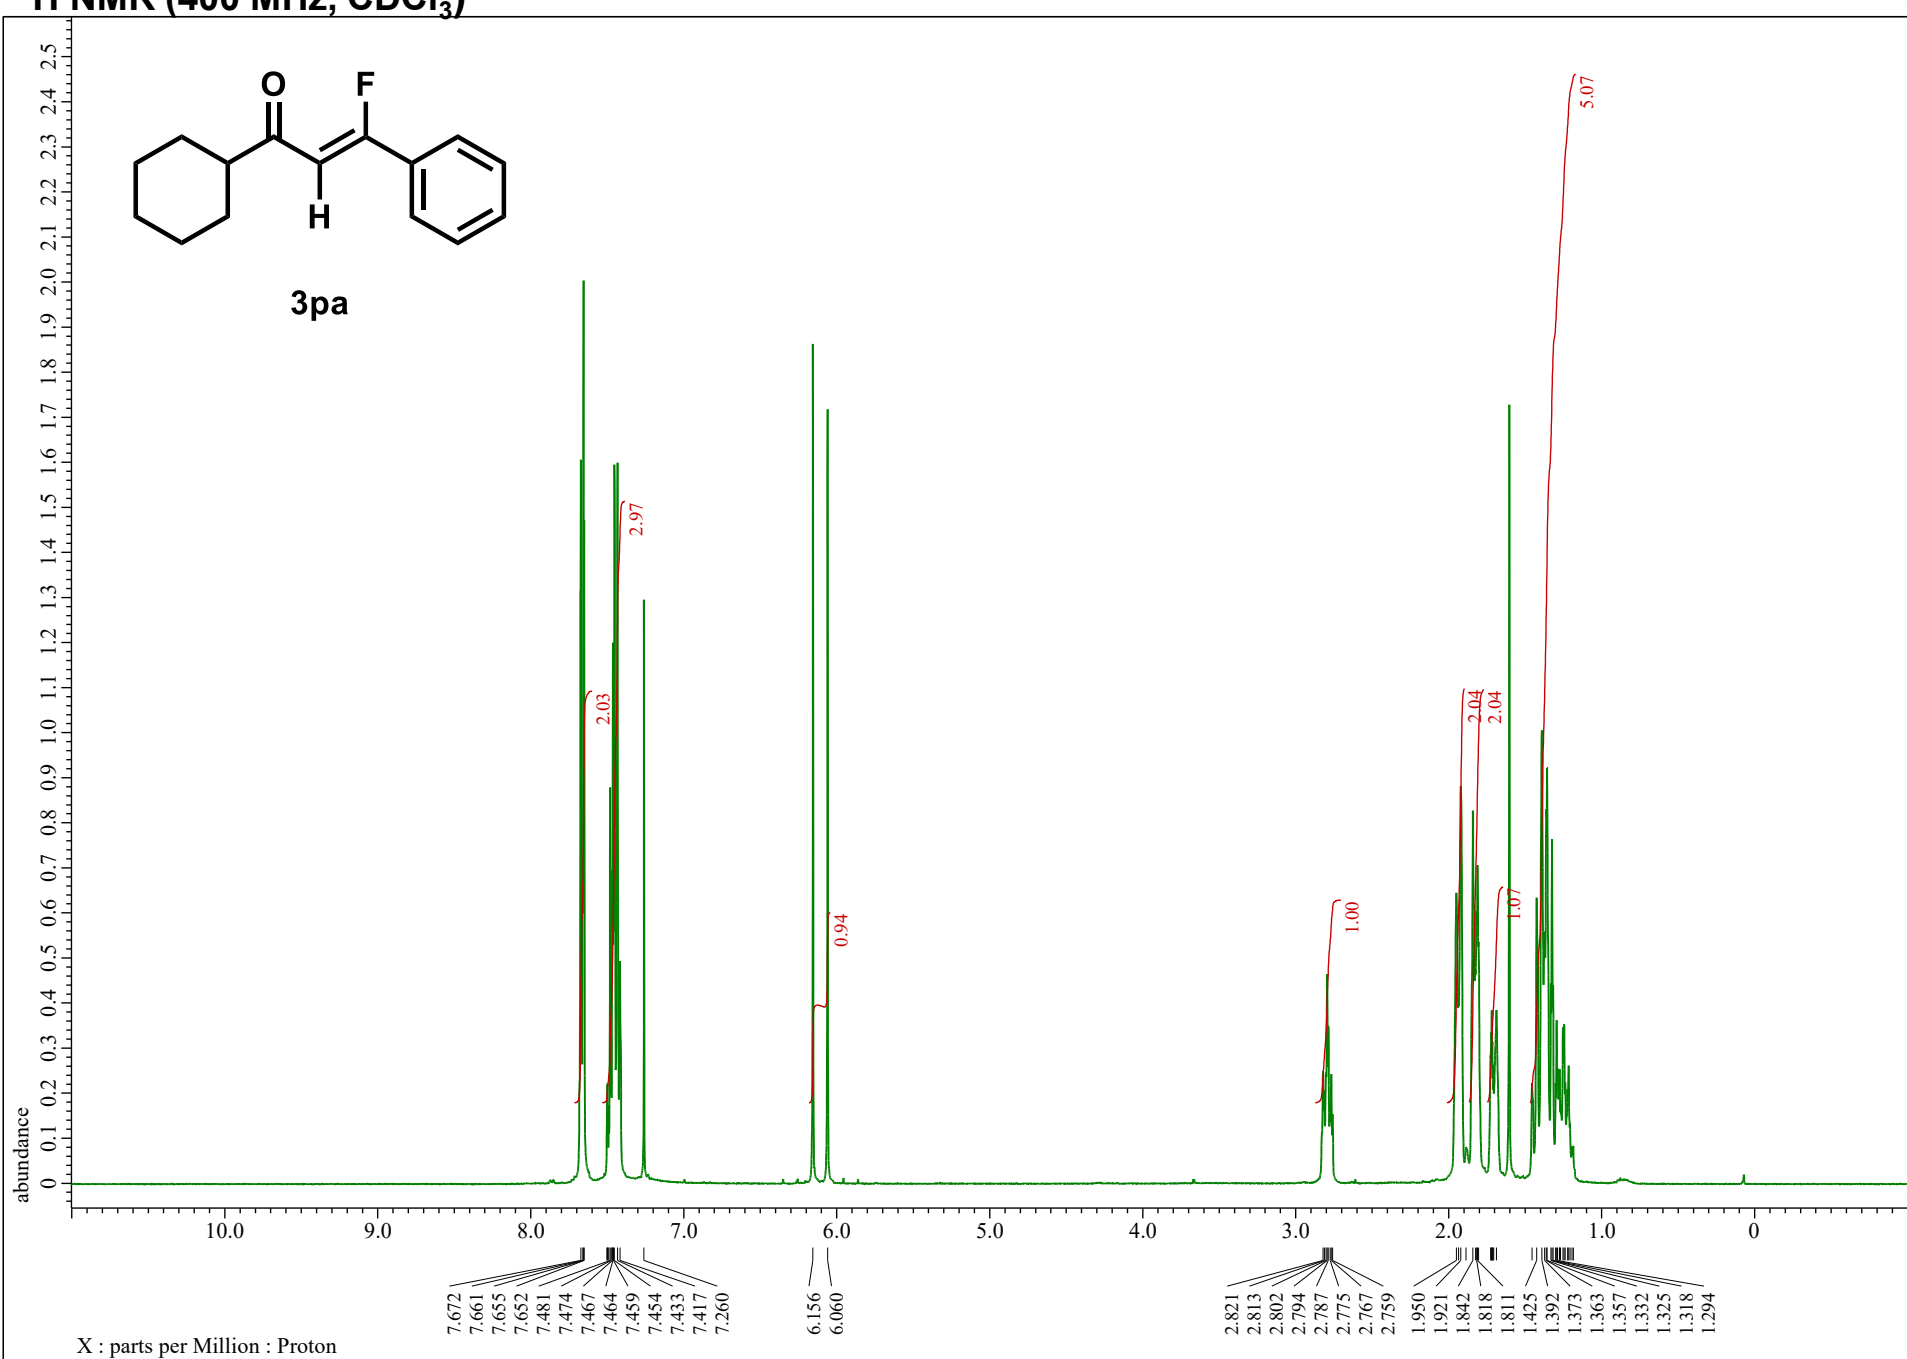



3pa

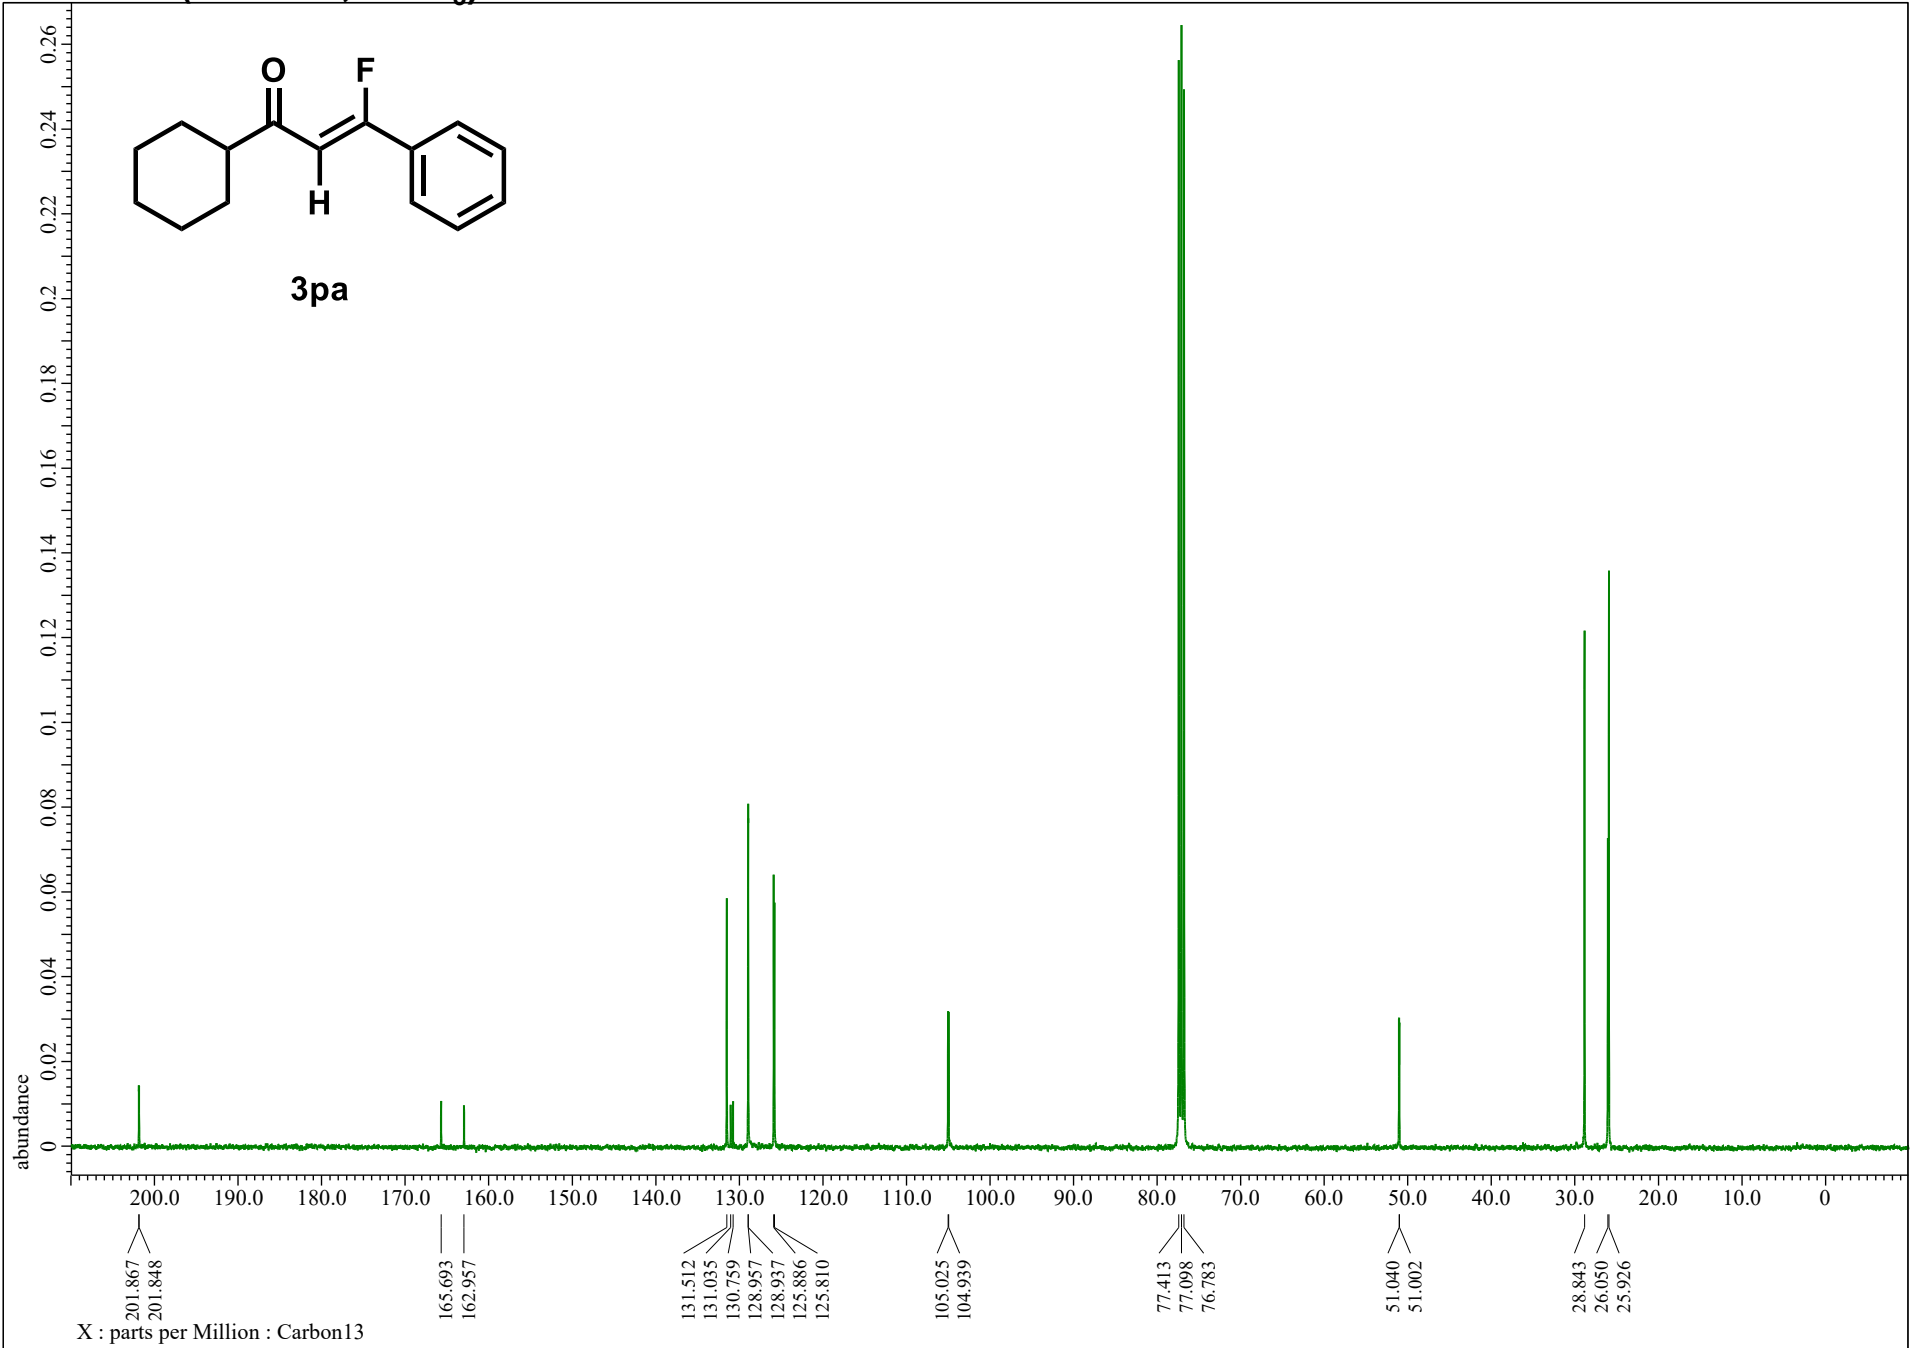

X : parts per Million : Carbon13

**<sup>19</sup>F NMR (376 MHz, CDCl<sub>3</sub>)**

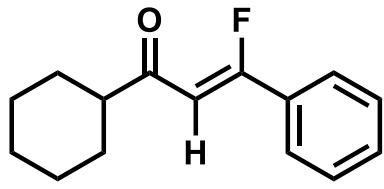

**3pa**

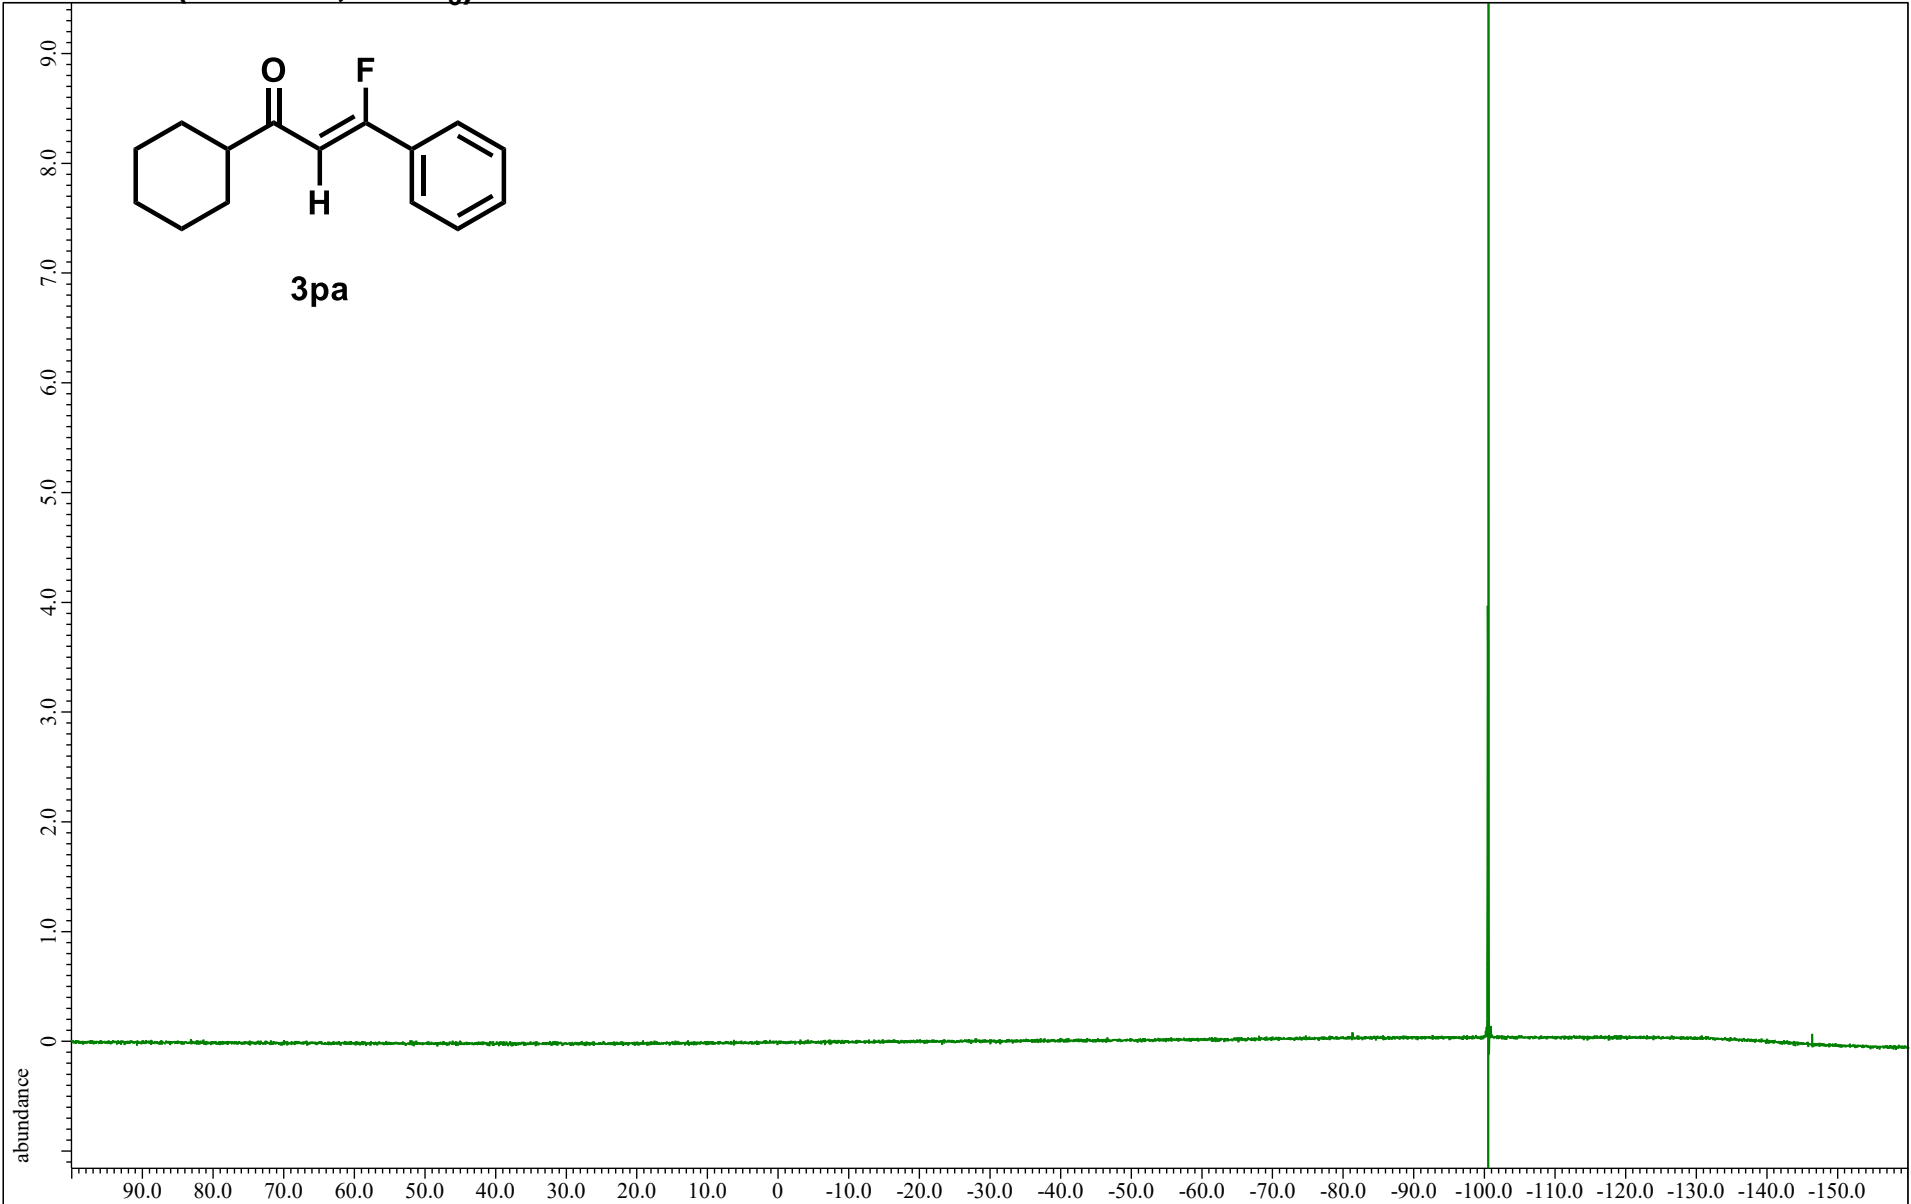

-100.457  
-100.580

X : parts per Million : Fluorine19

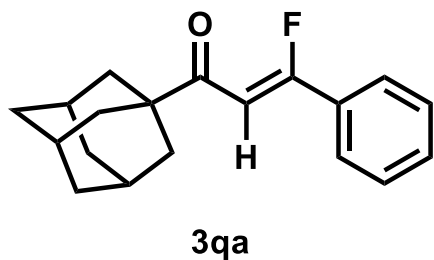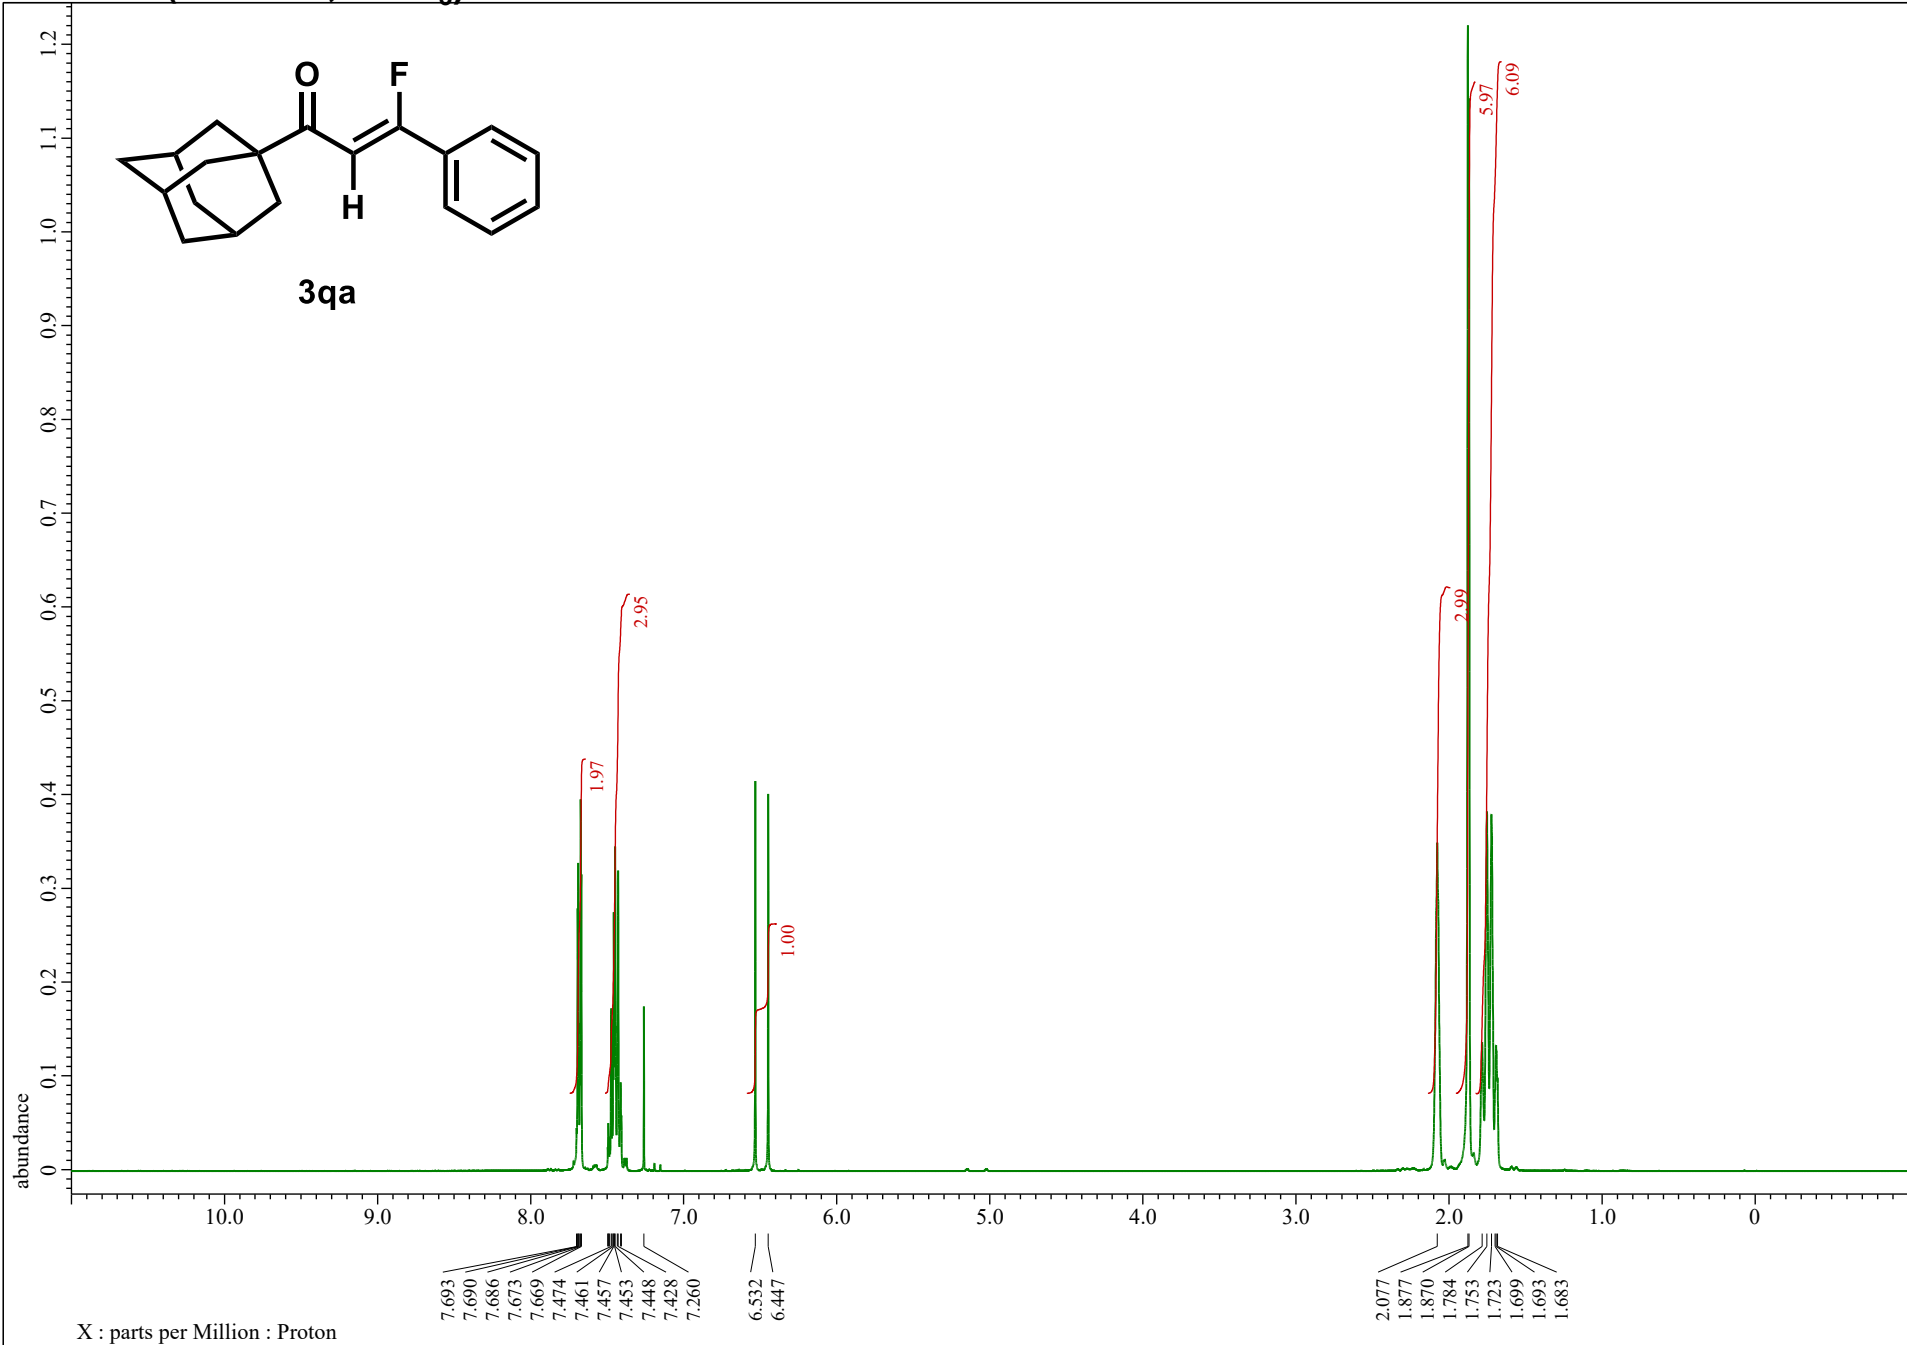

**<sup>13</sup>C NMR (101 MHz, CDCl<sub>3</sub>)**

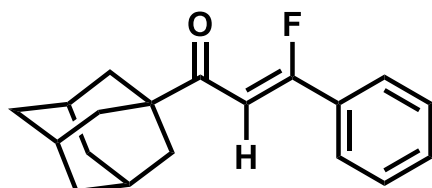

**3qa**

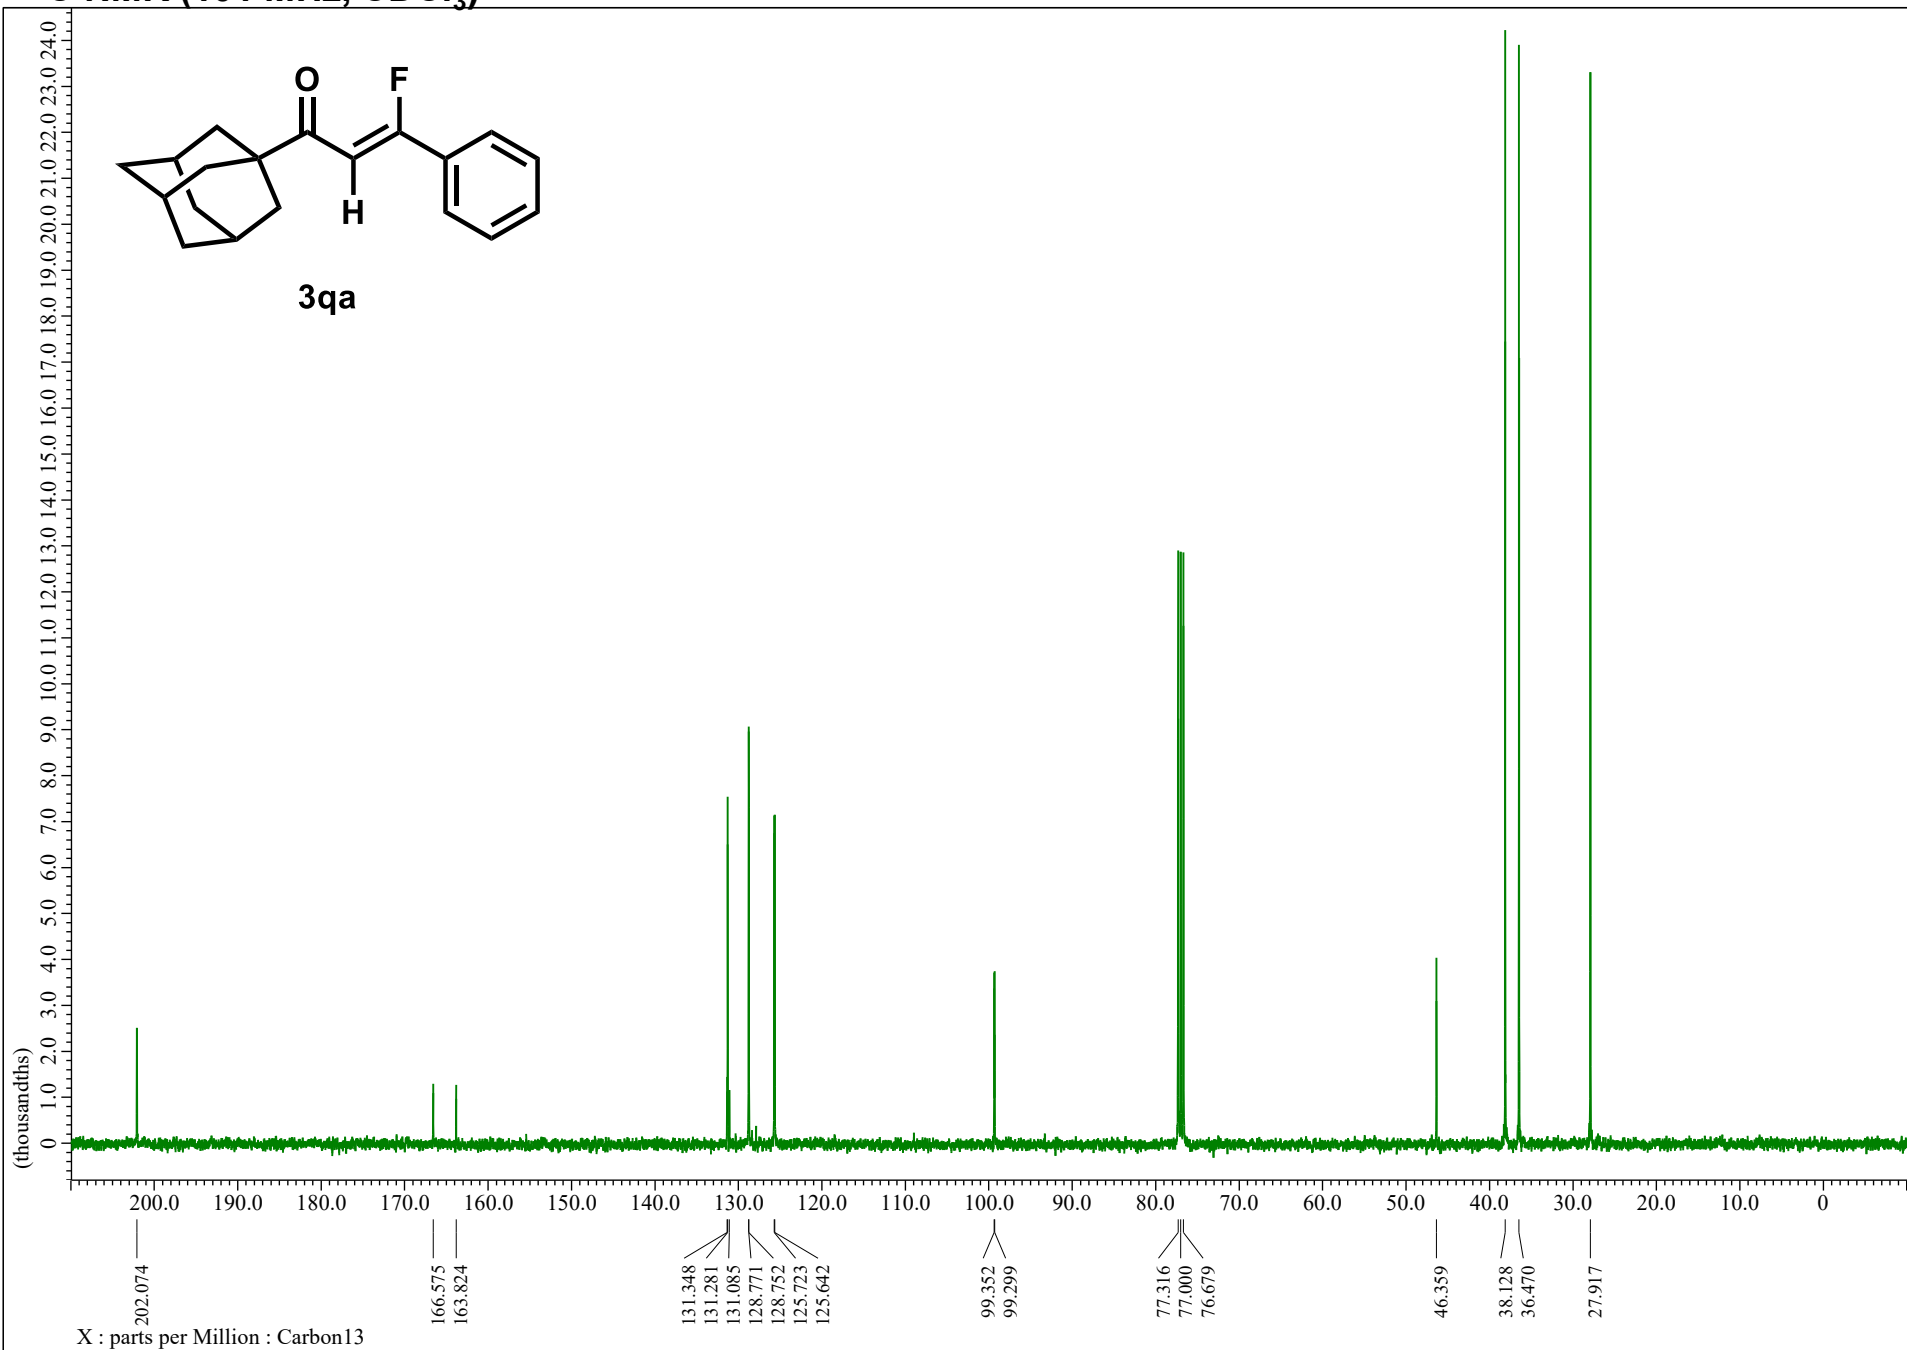

**$^{19}\text{F}$  NMR (376 MHz,  $\text{CDCl}_3$ )**

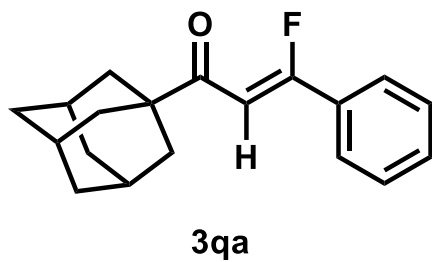

+ *E* isomer

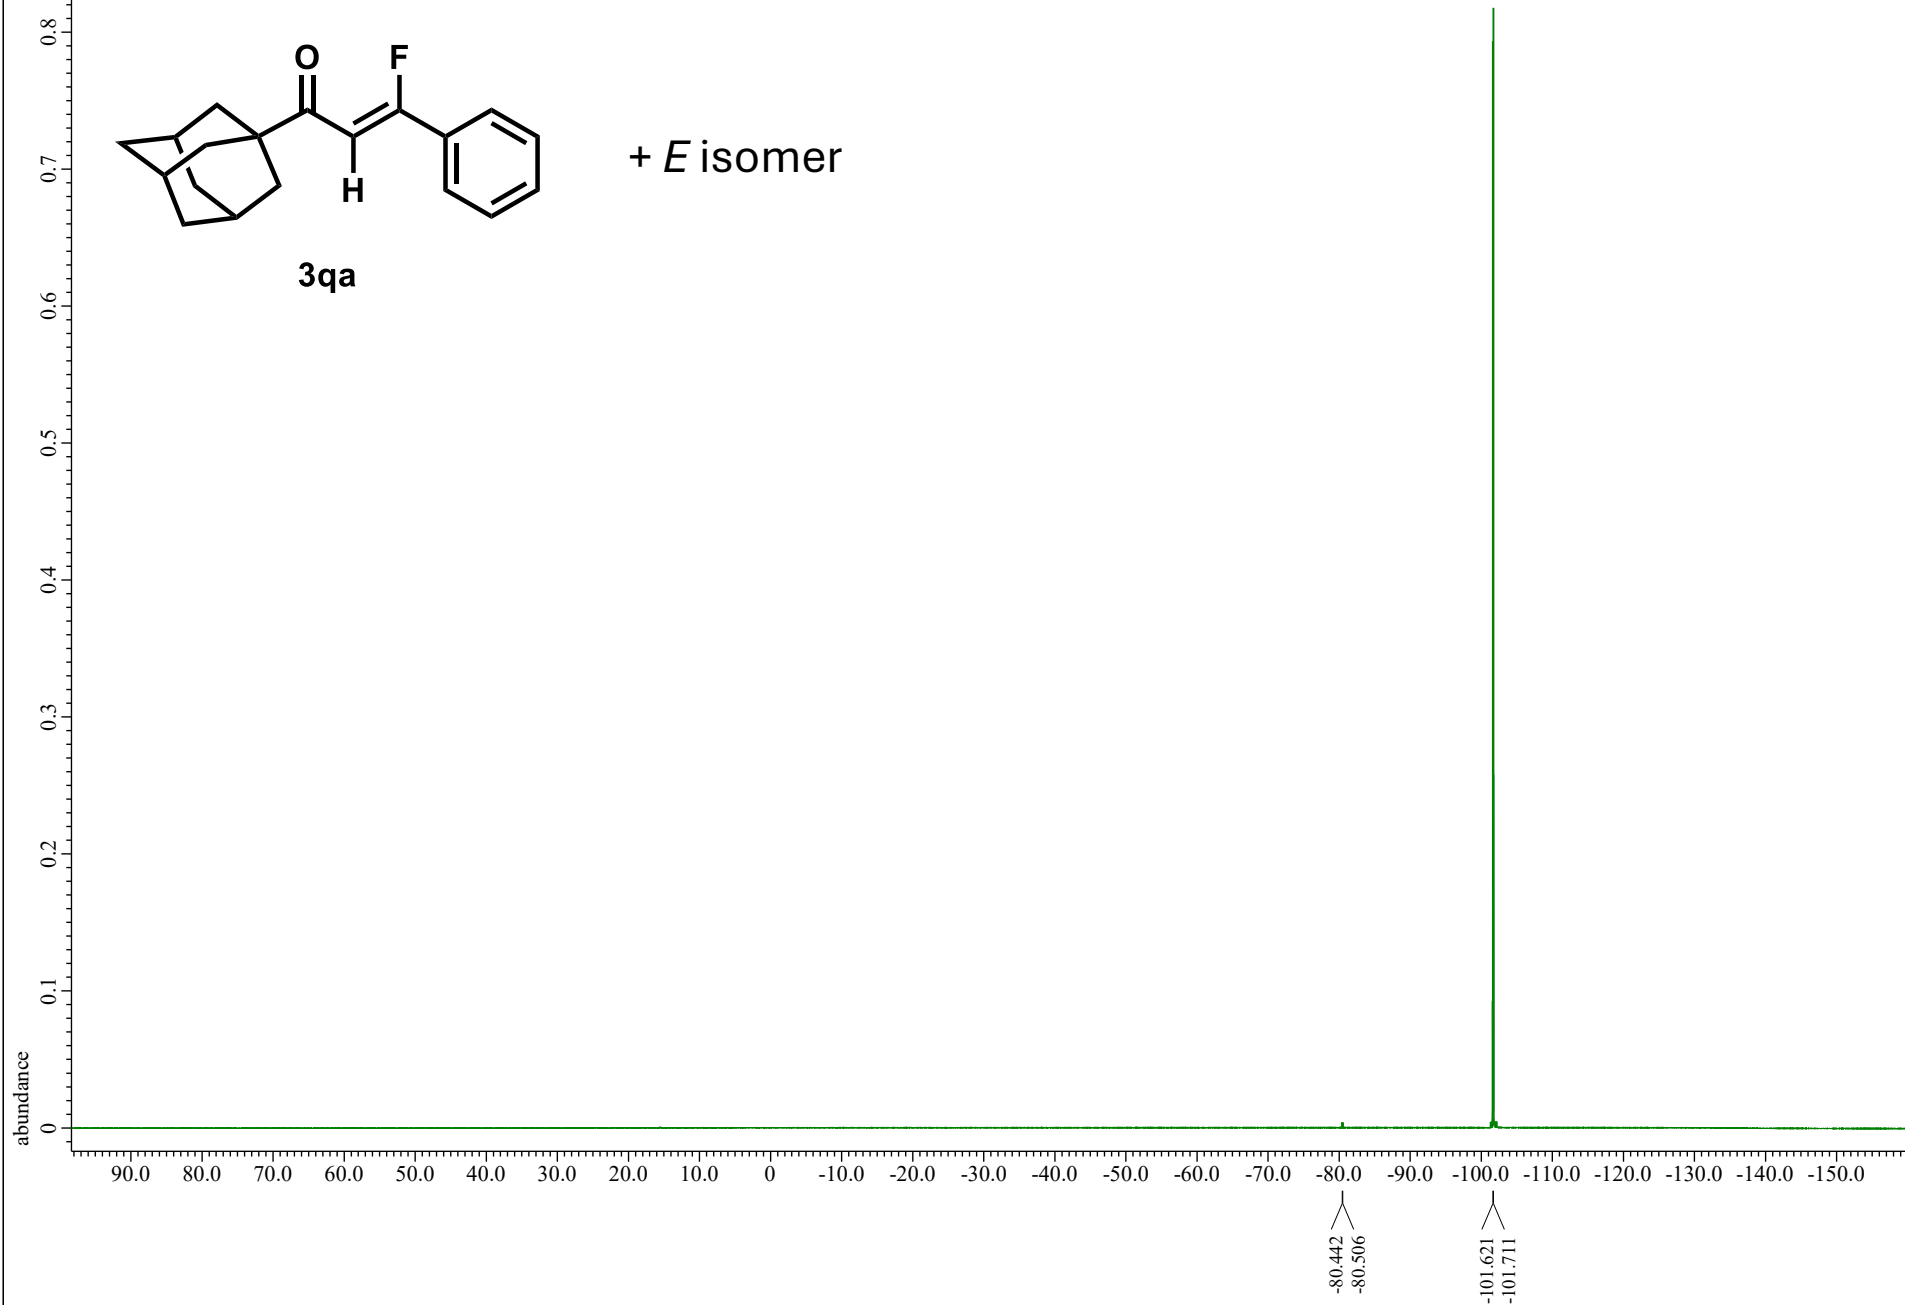

X : parts per Million : Fluorine19

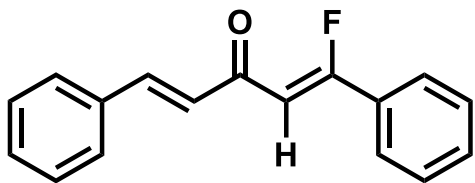

**3ra**

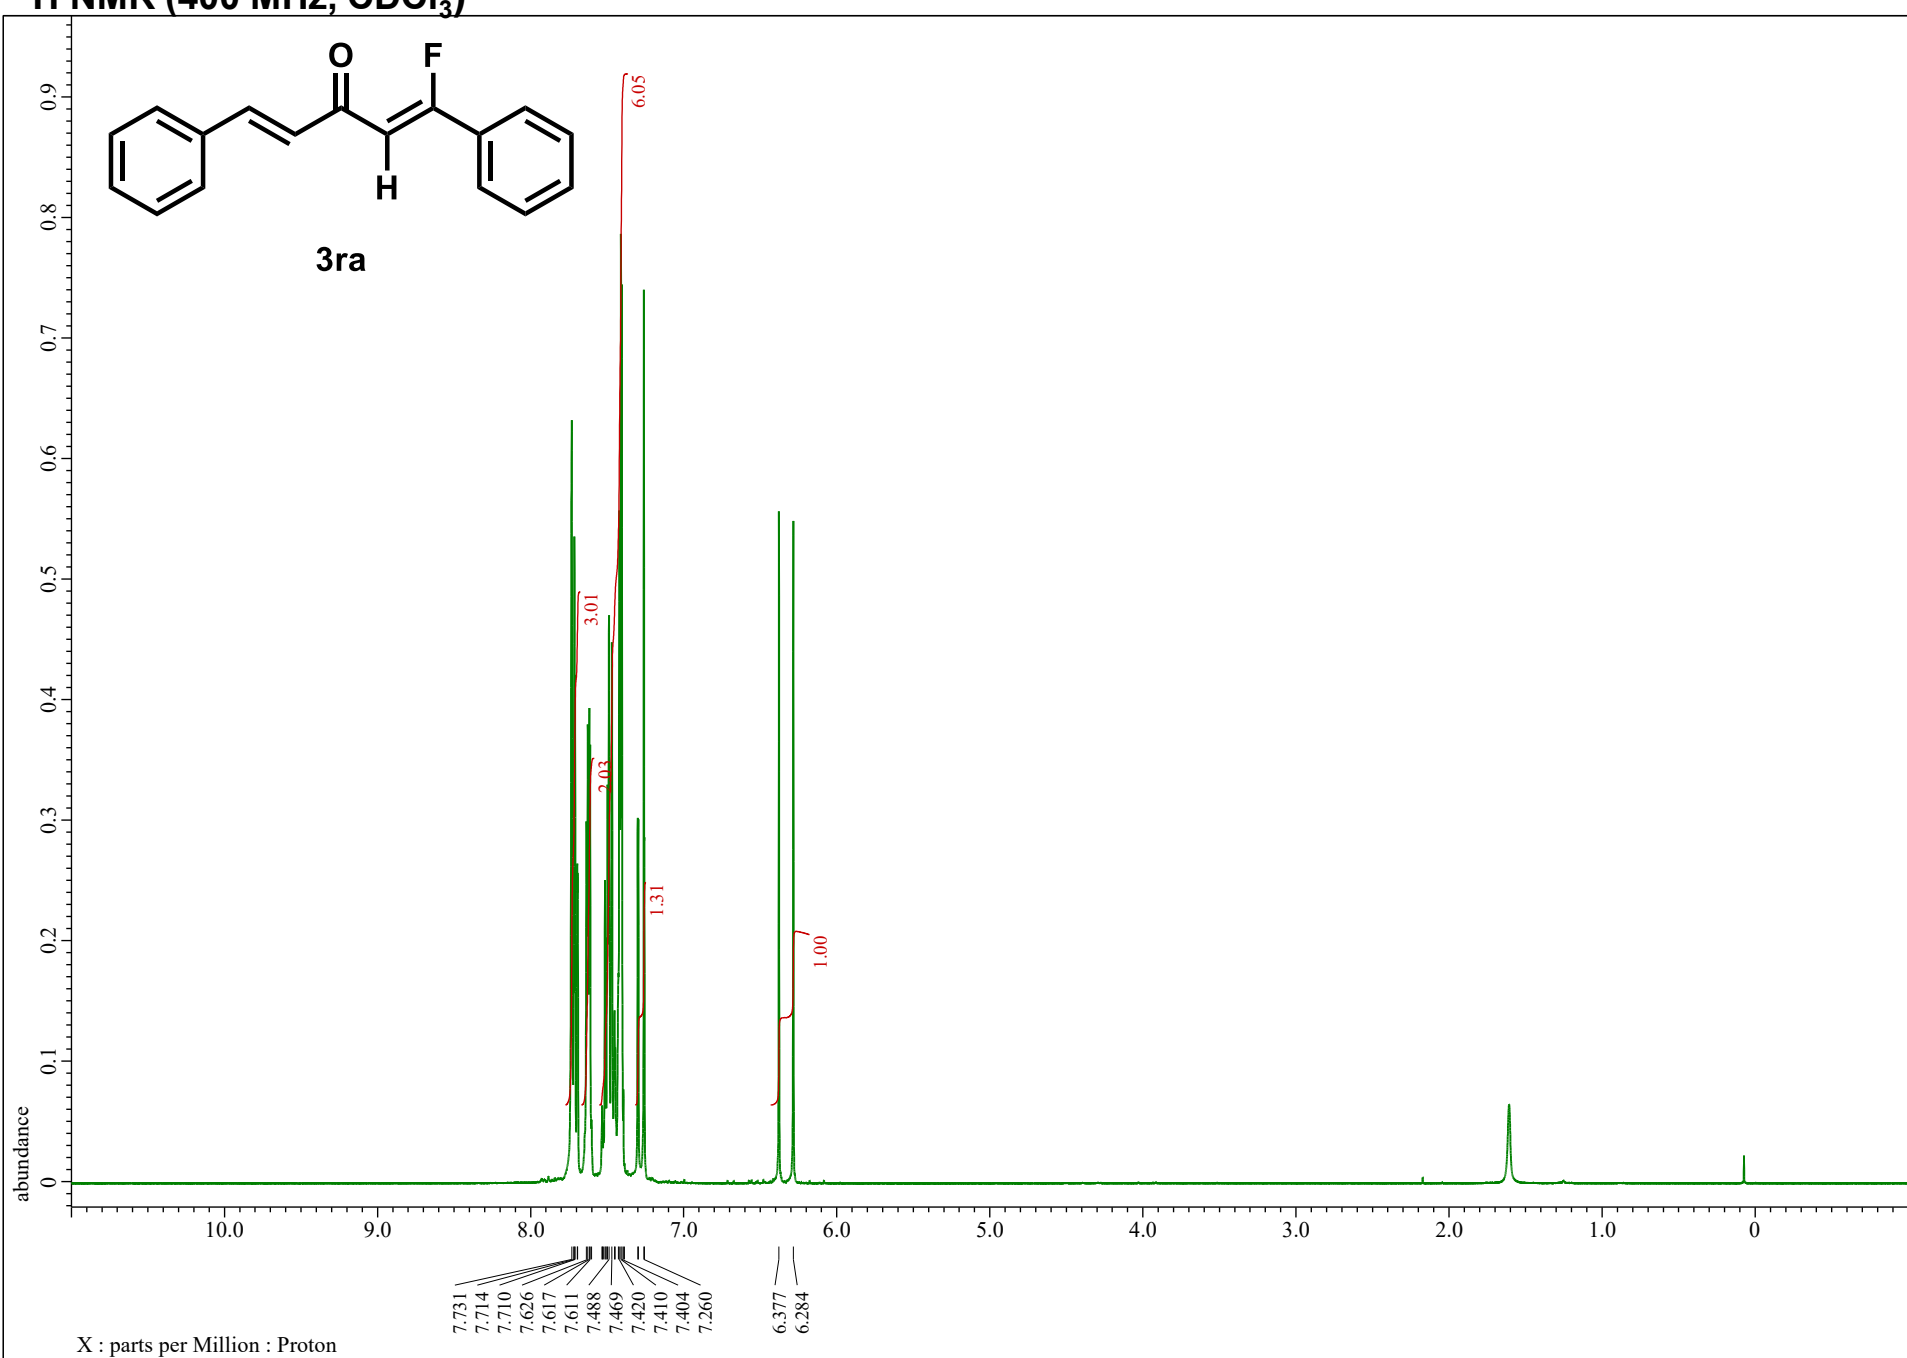

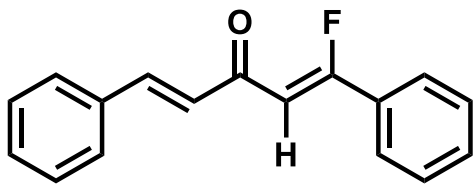

3ra

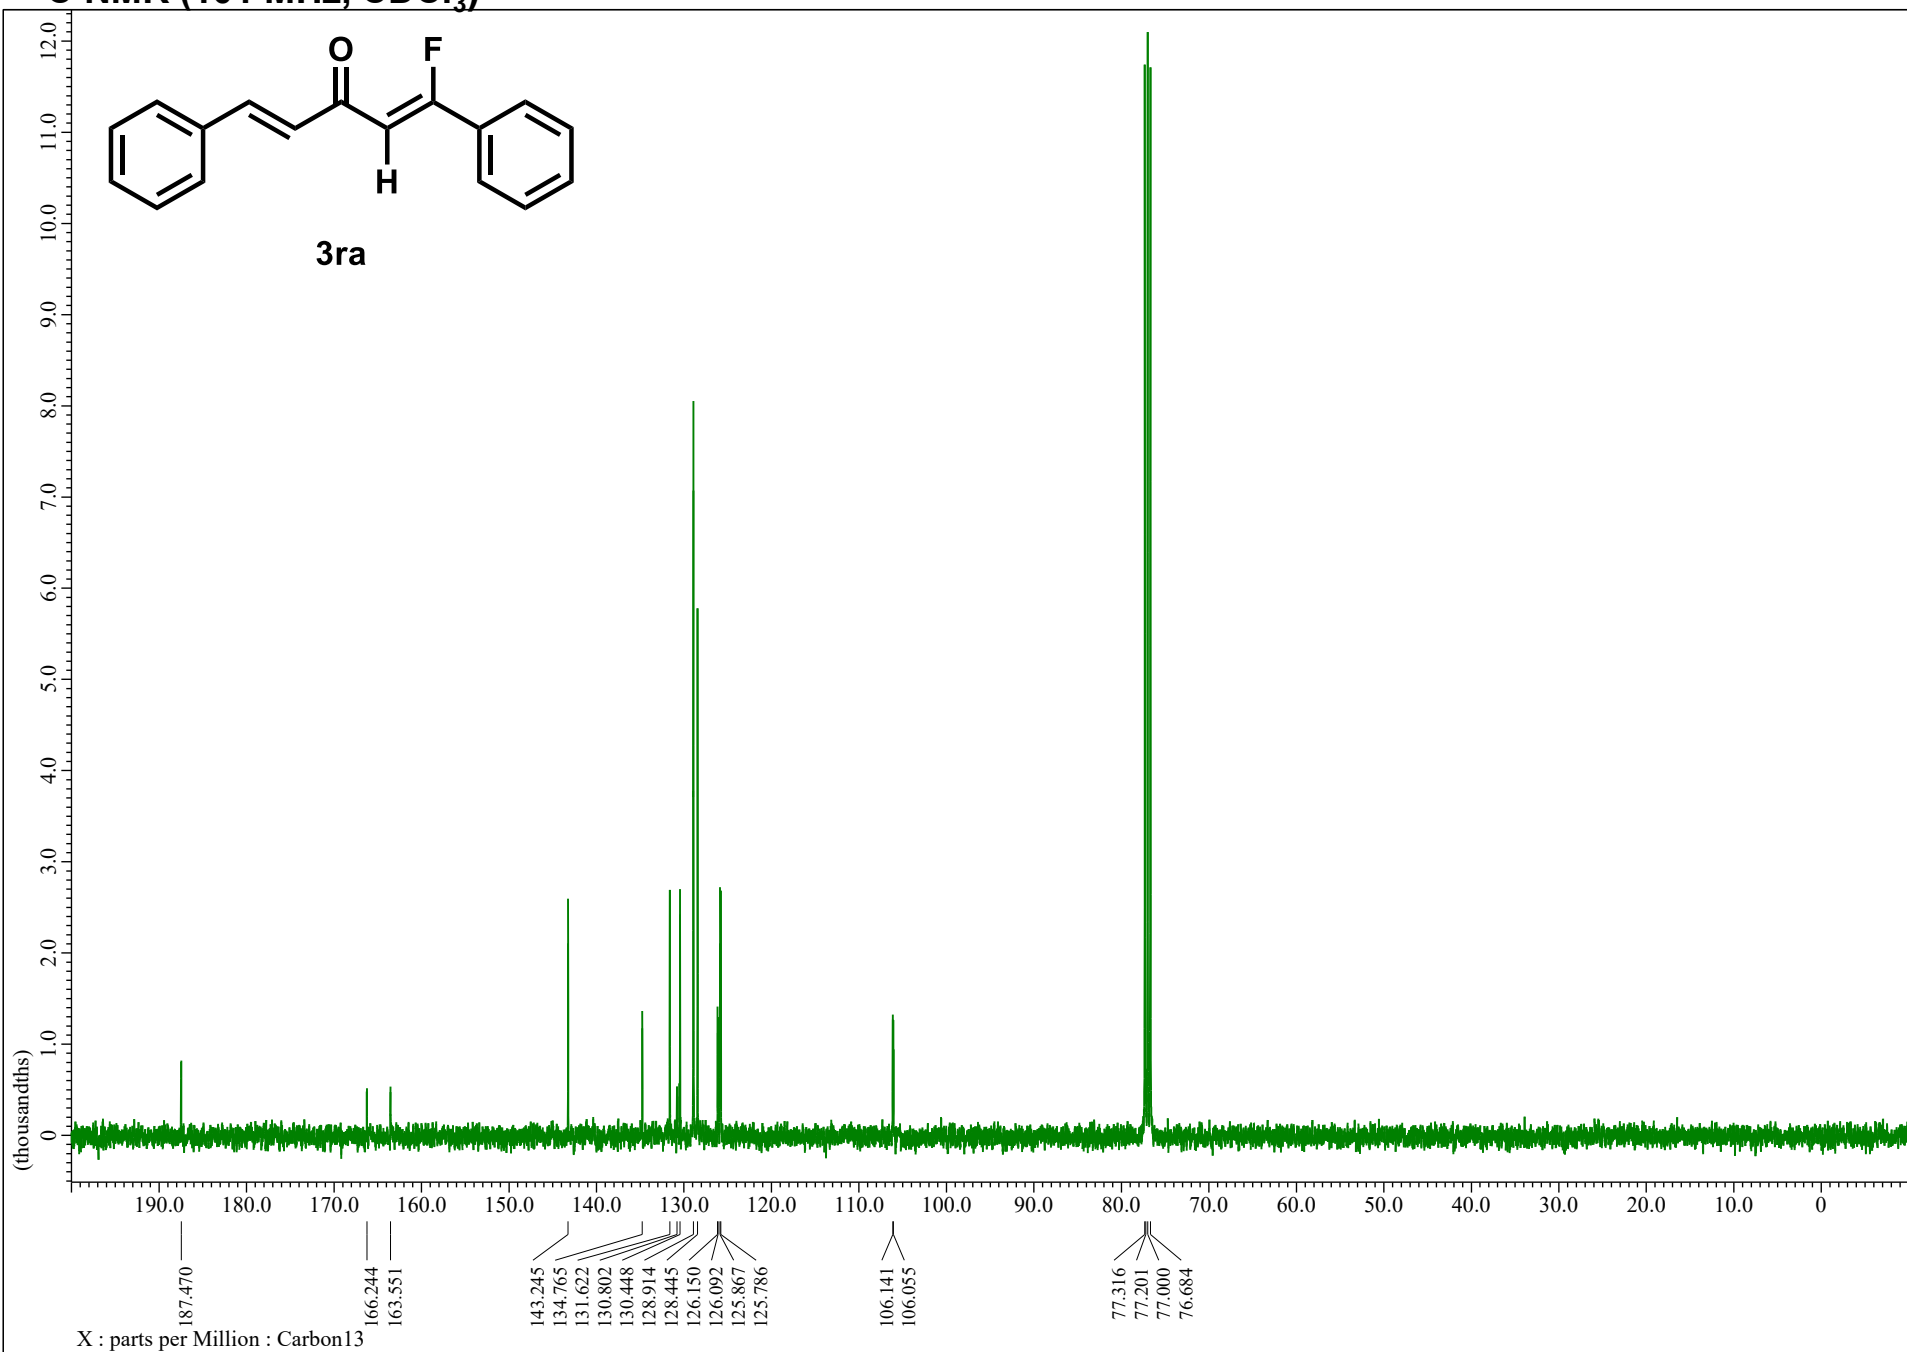

**<sup>19</sup>F NMR (376 MHz, CDCl<sub>3</sub>)**

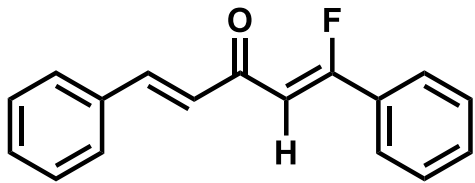

**3ra**

+ *E* isomer

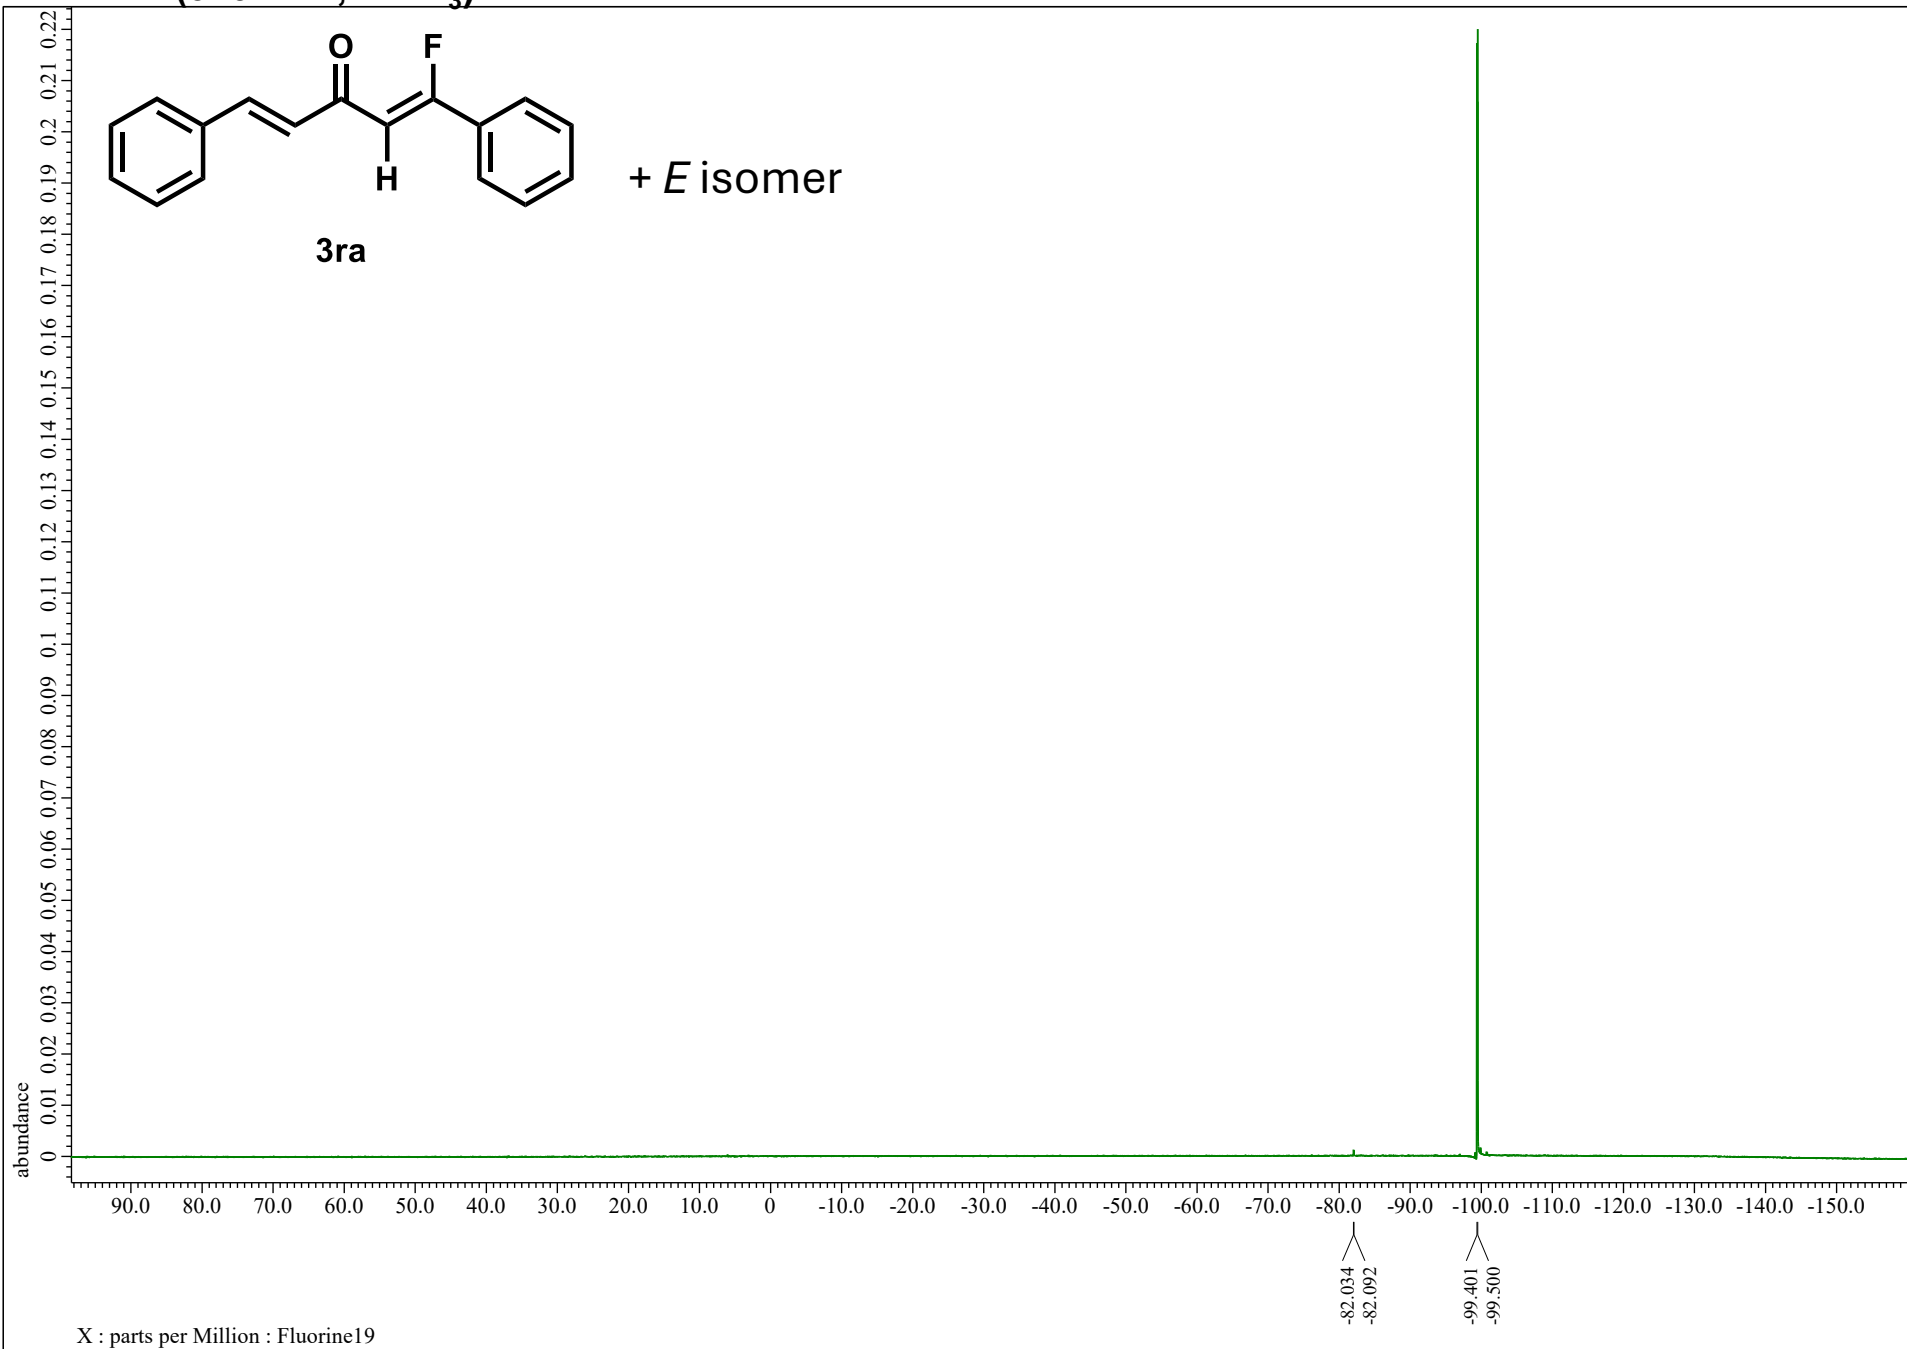

**<sup>1</sup>H NMR (400 MHz, CDCl<sub>3</sub>)**

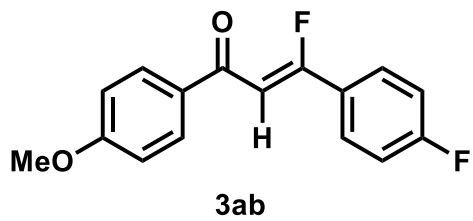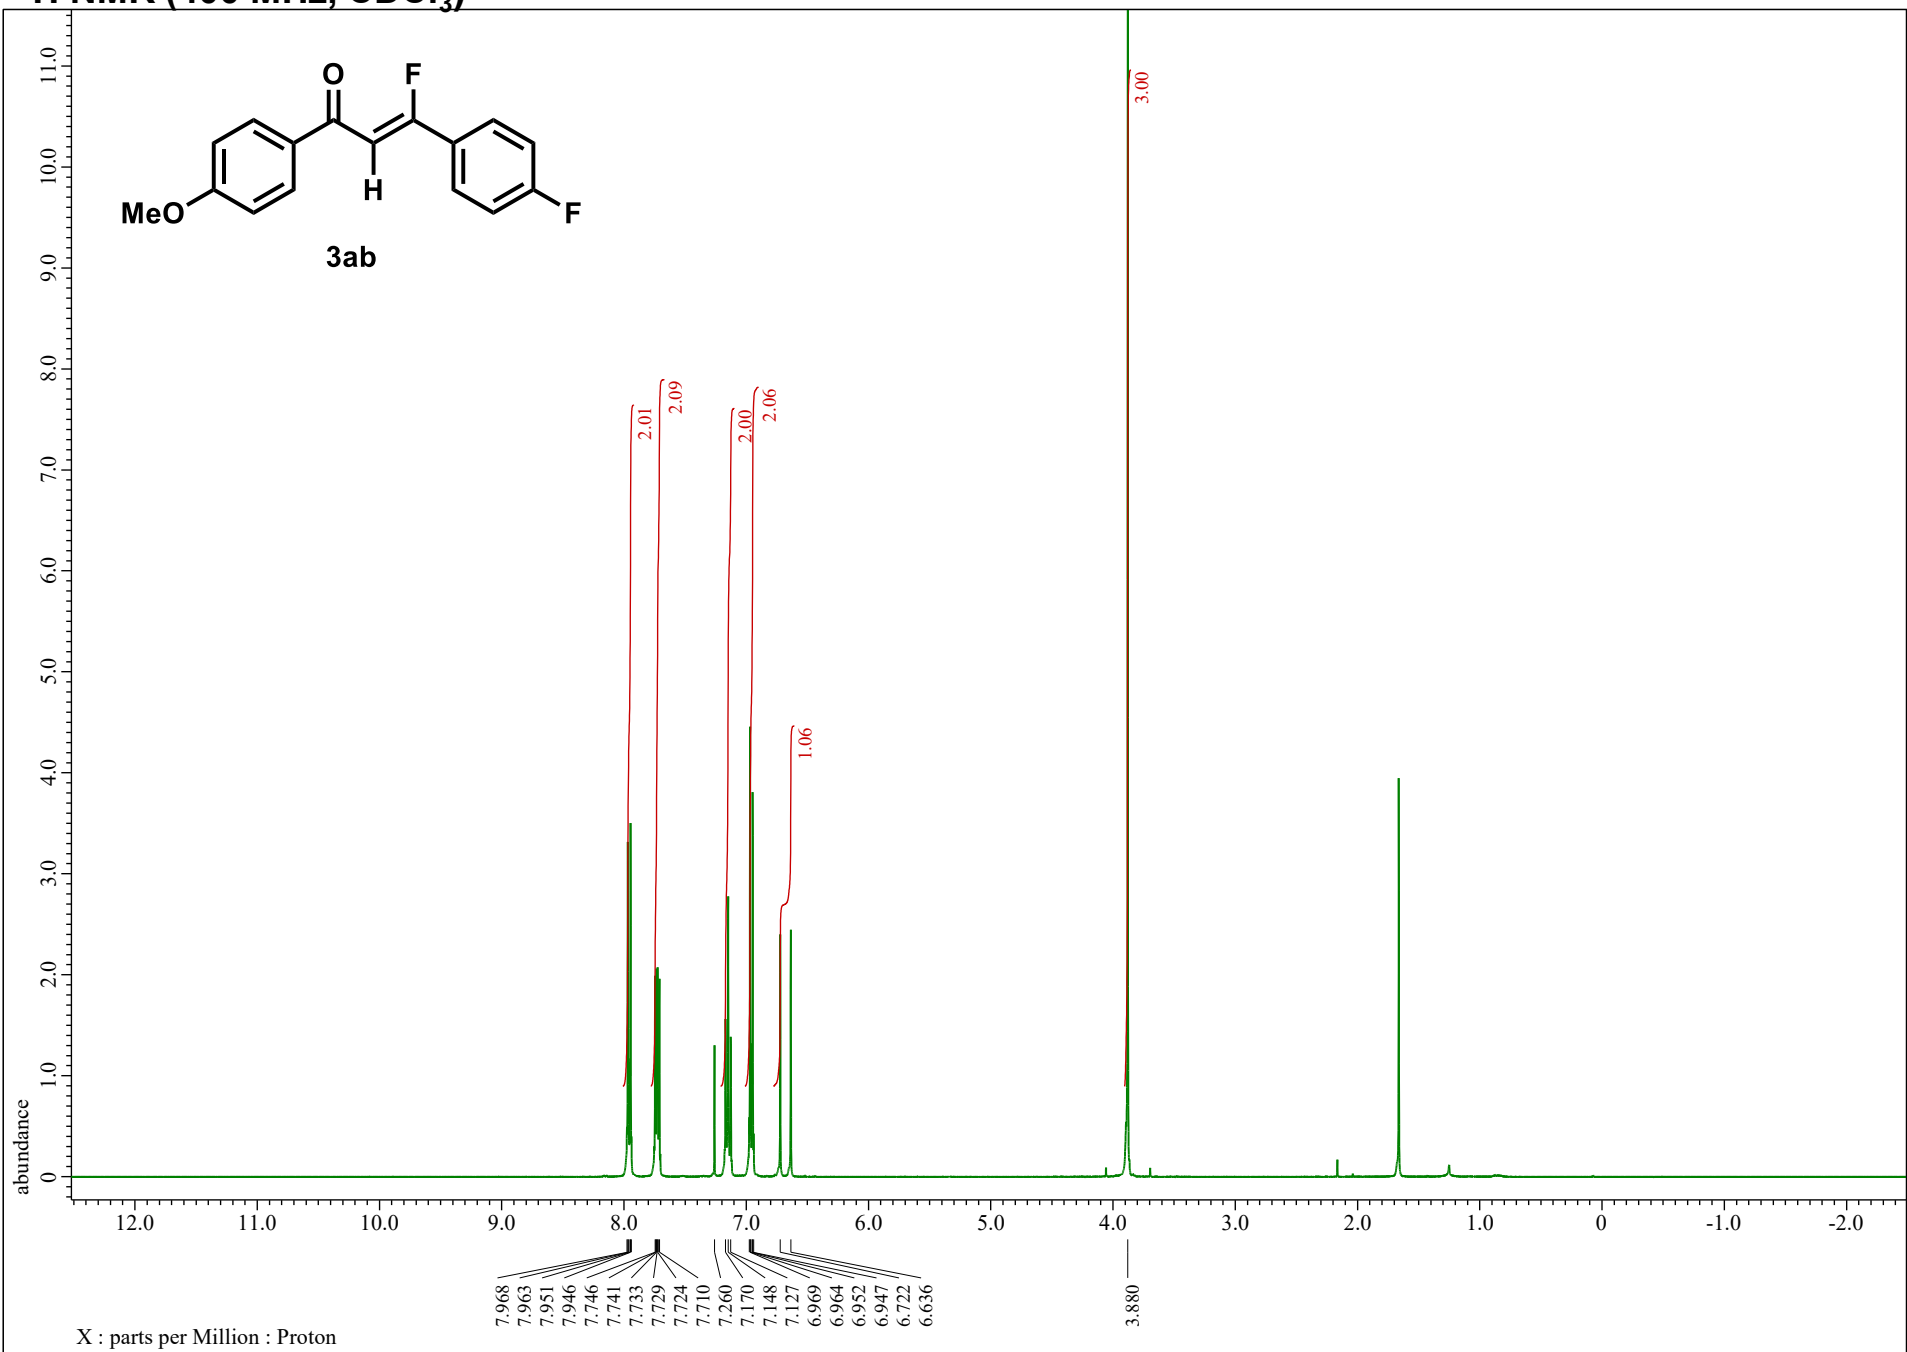

**<sup>13</sup>C NMR (101 MHz, CDCl<sub>3</sub>)**

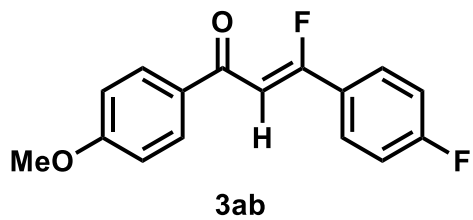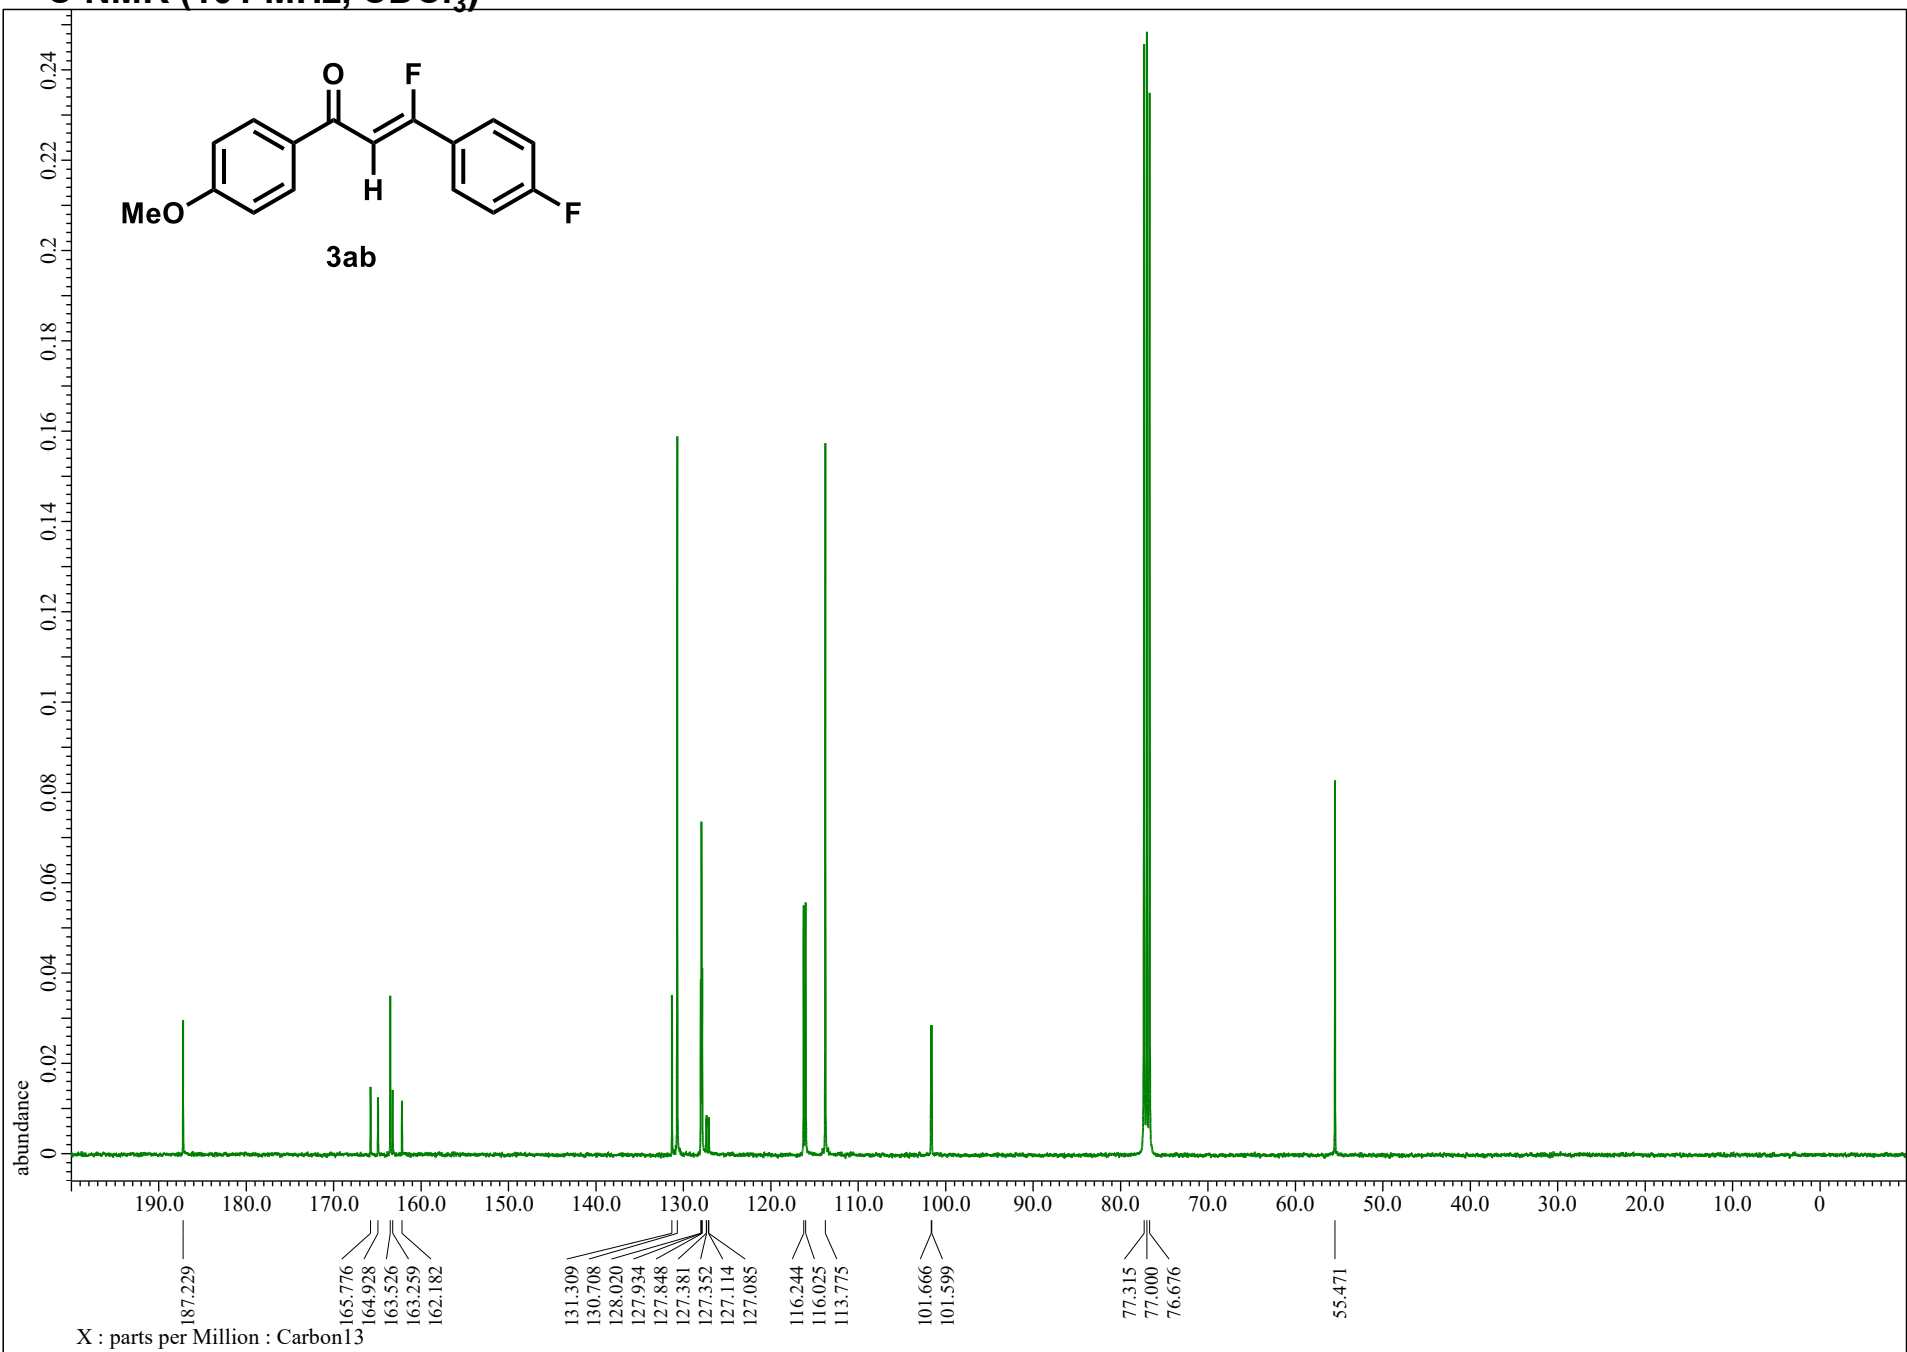

**<sup>19</sup>F NMR (376 MHz, CDCl<sub>3</sub>)**

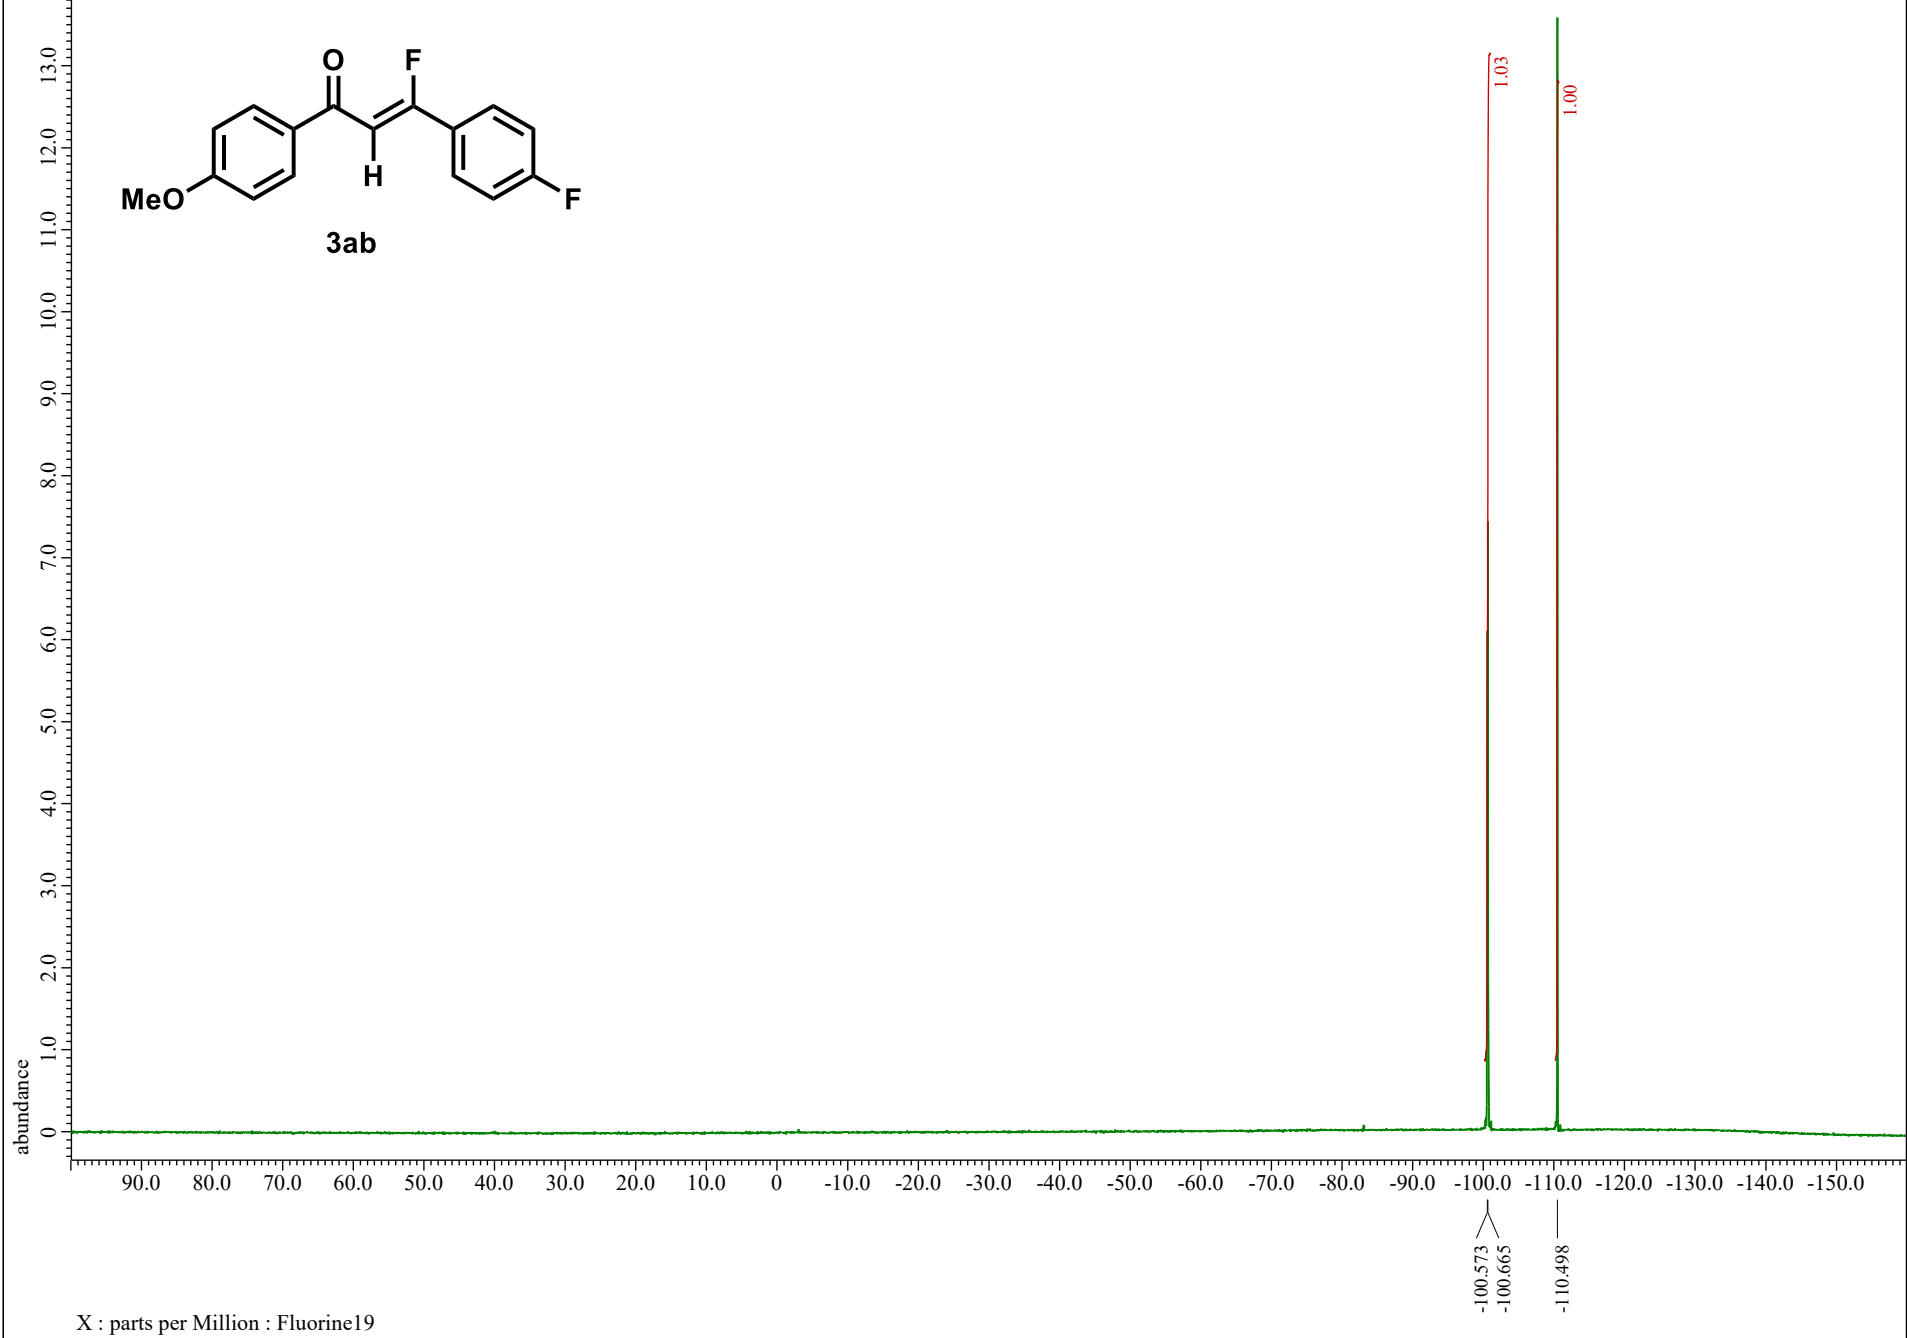

**<sup>1</sup>H NMR (400 MHz, CDCl<sub>3</sub>)**

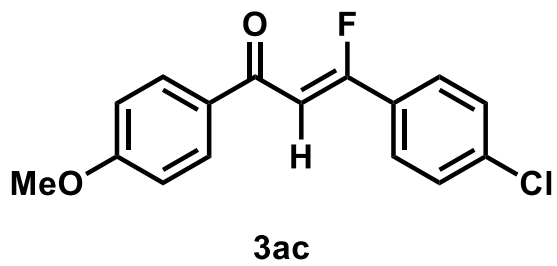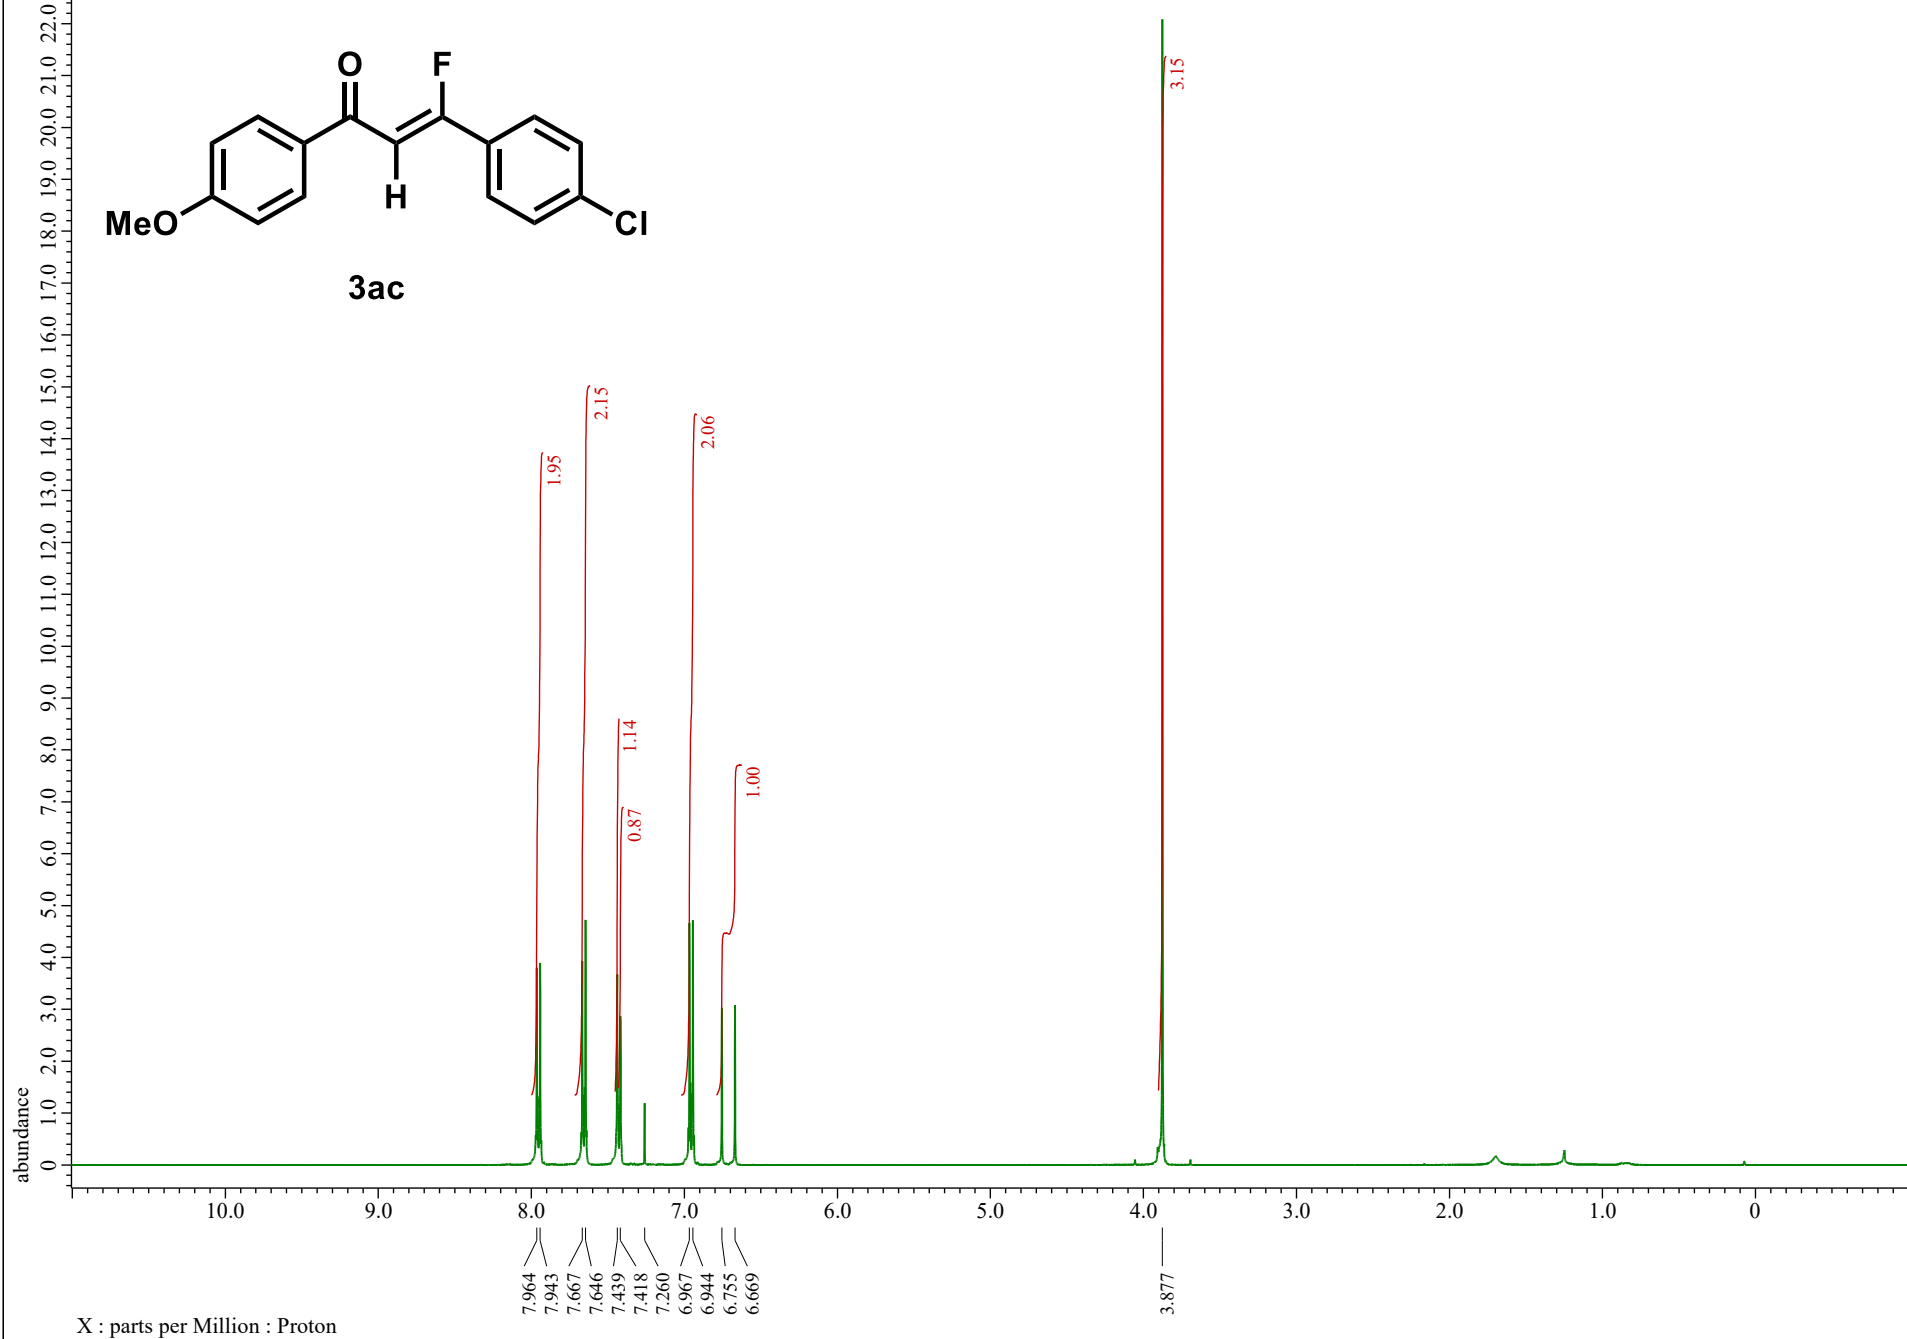

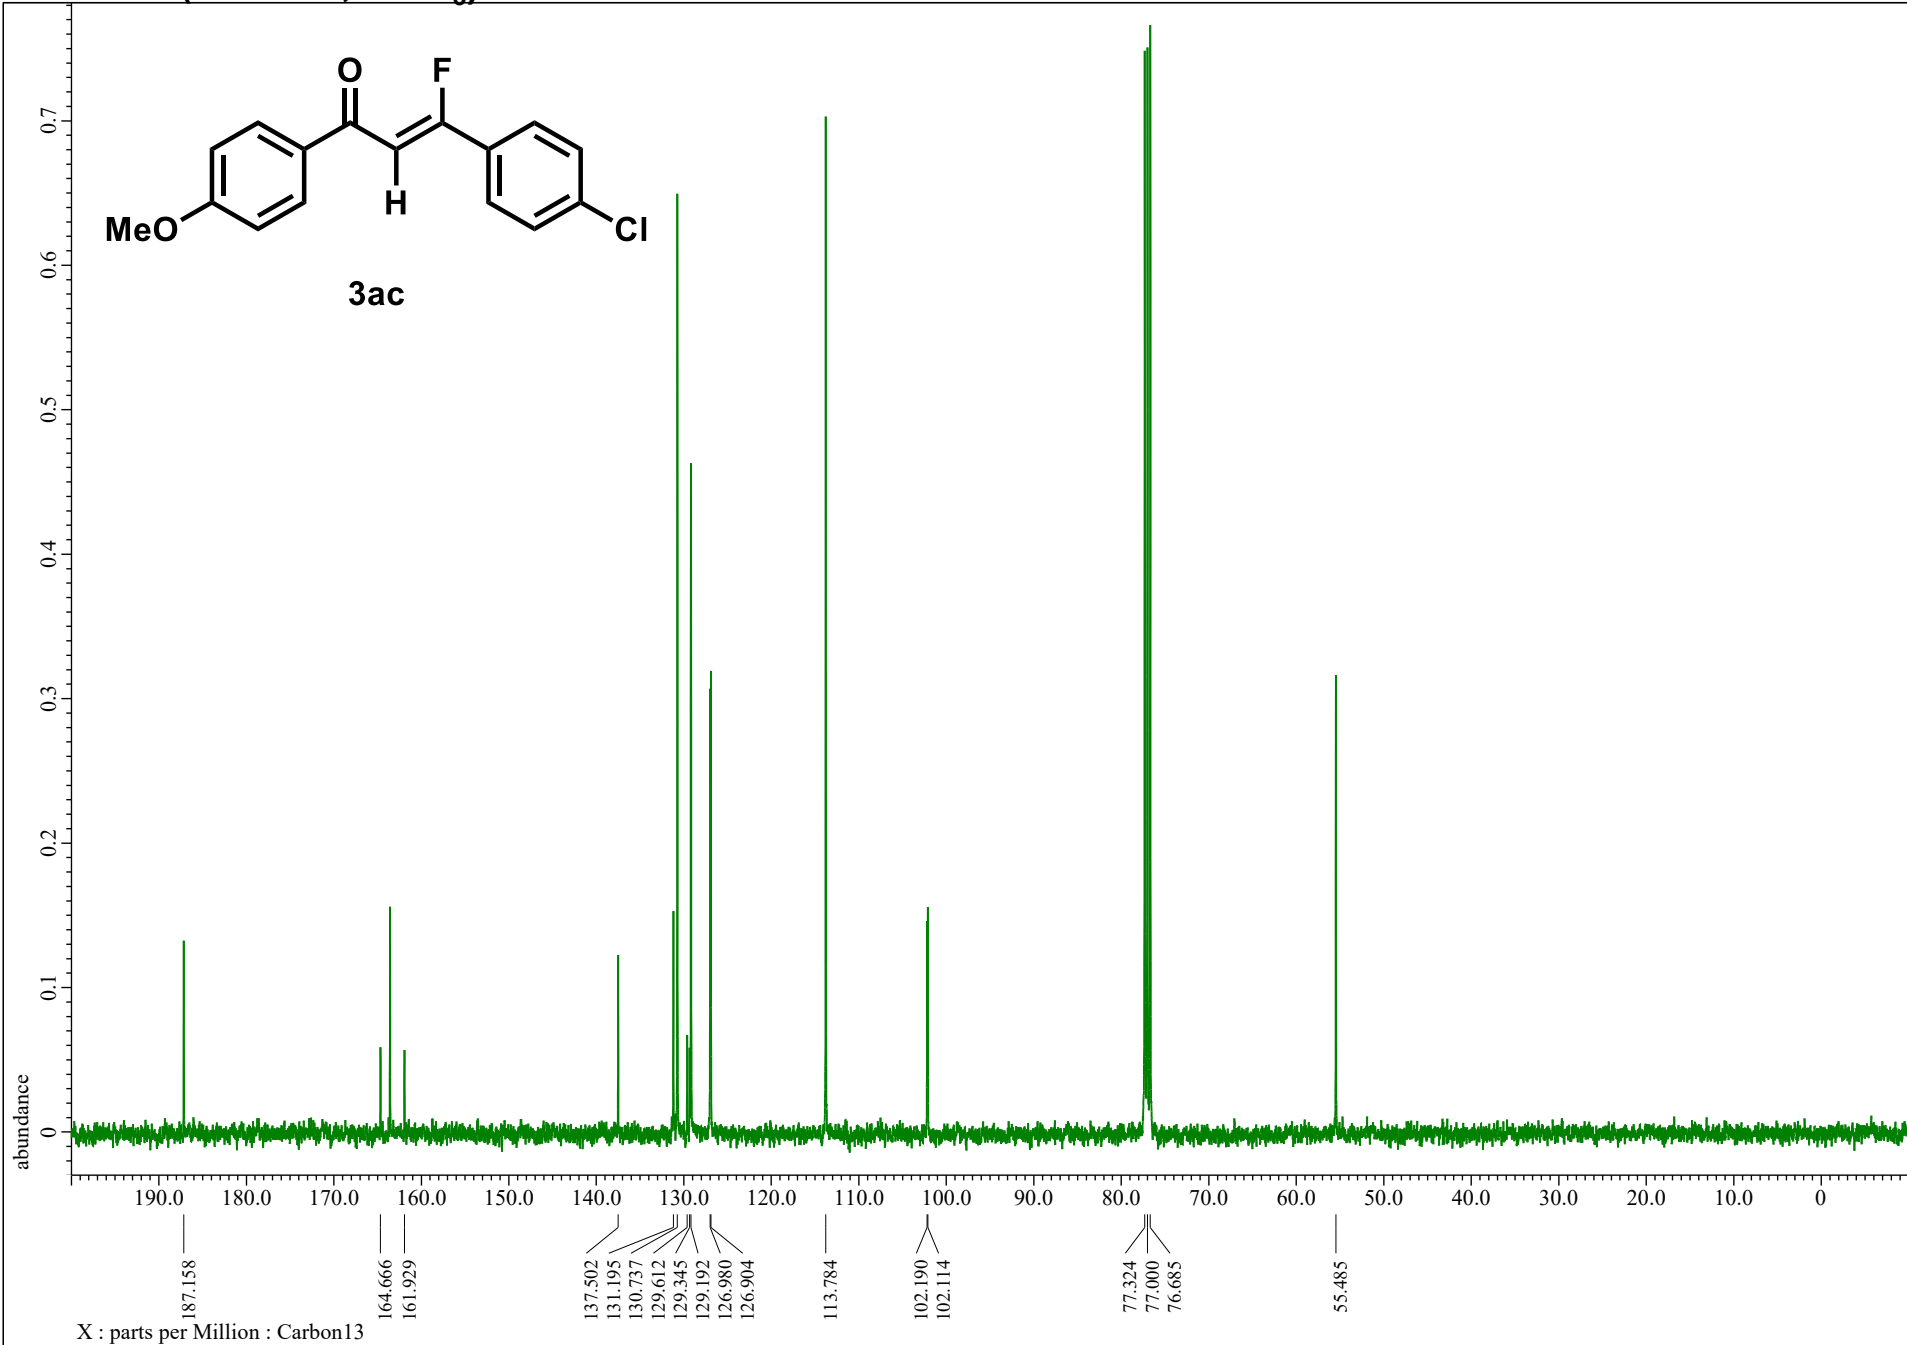

**<sup>19</sup>F NMR (376 MHz, CDCl<sub>3</sub>)**

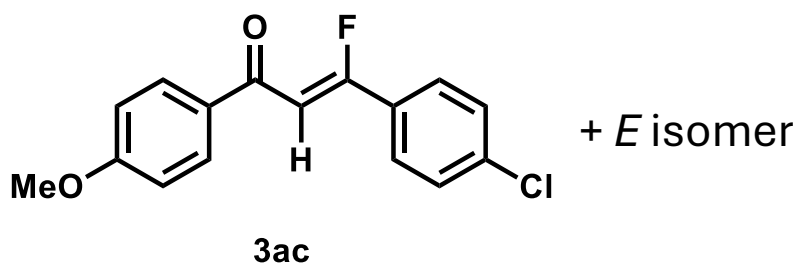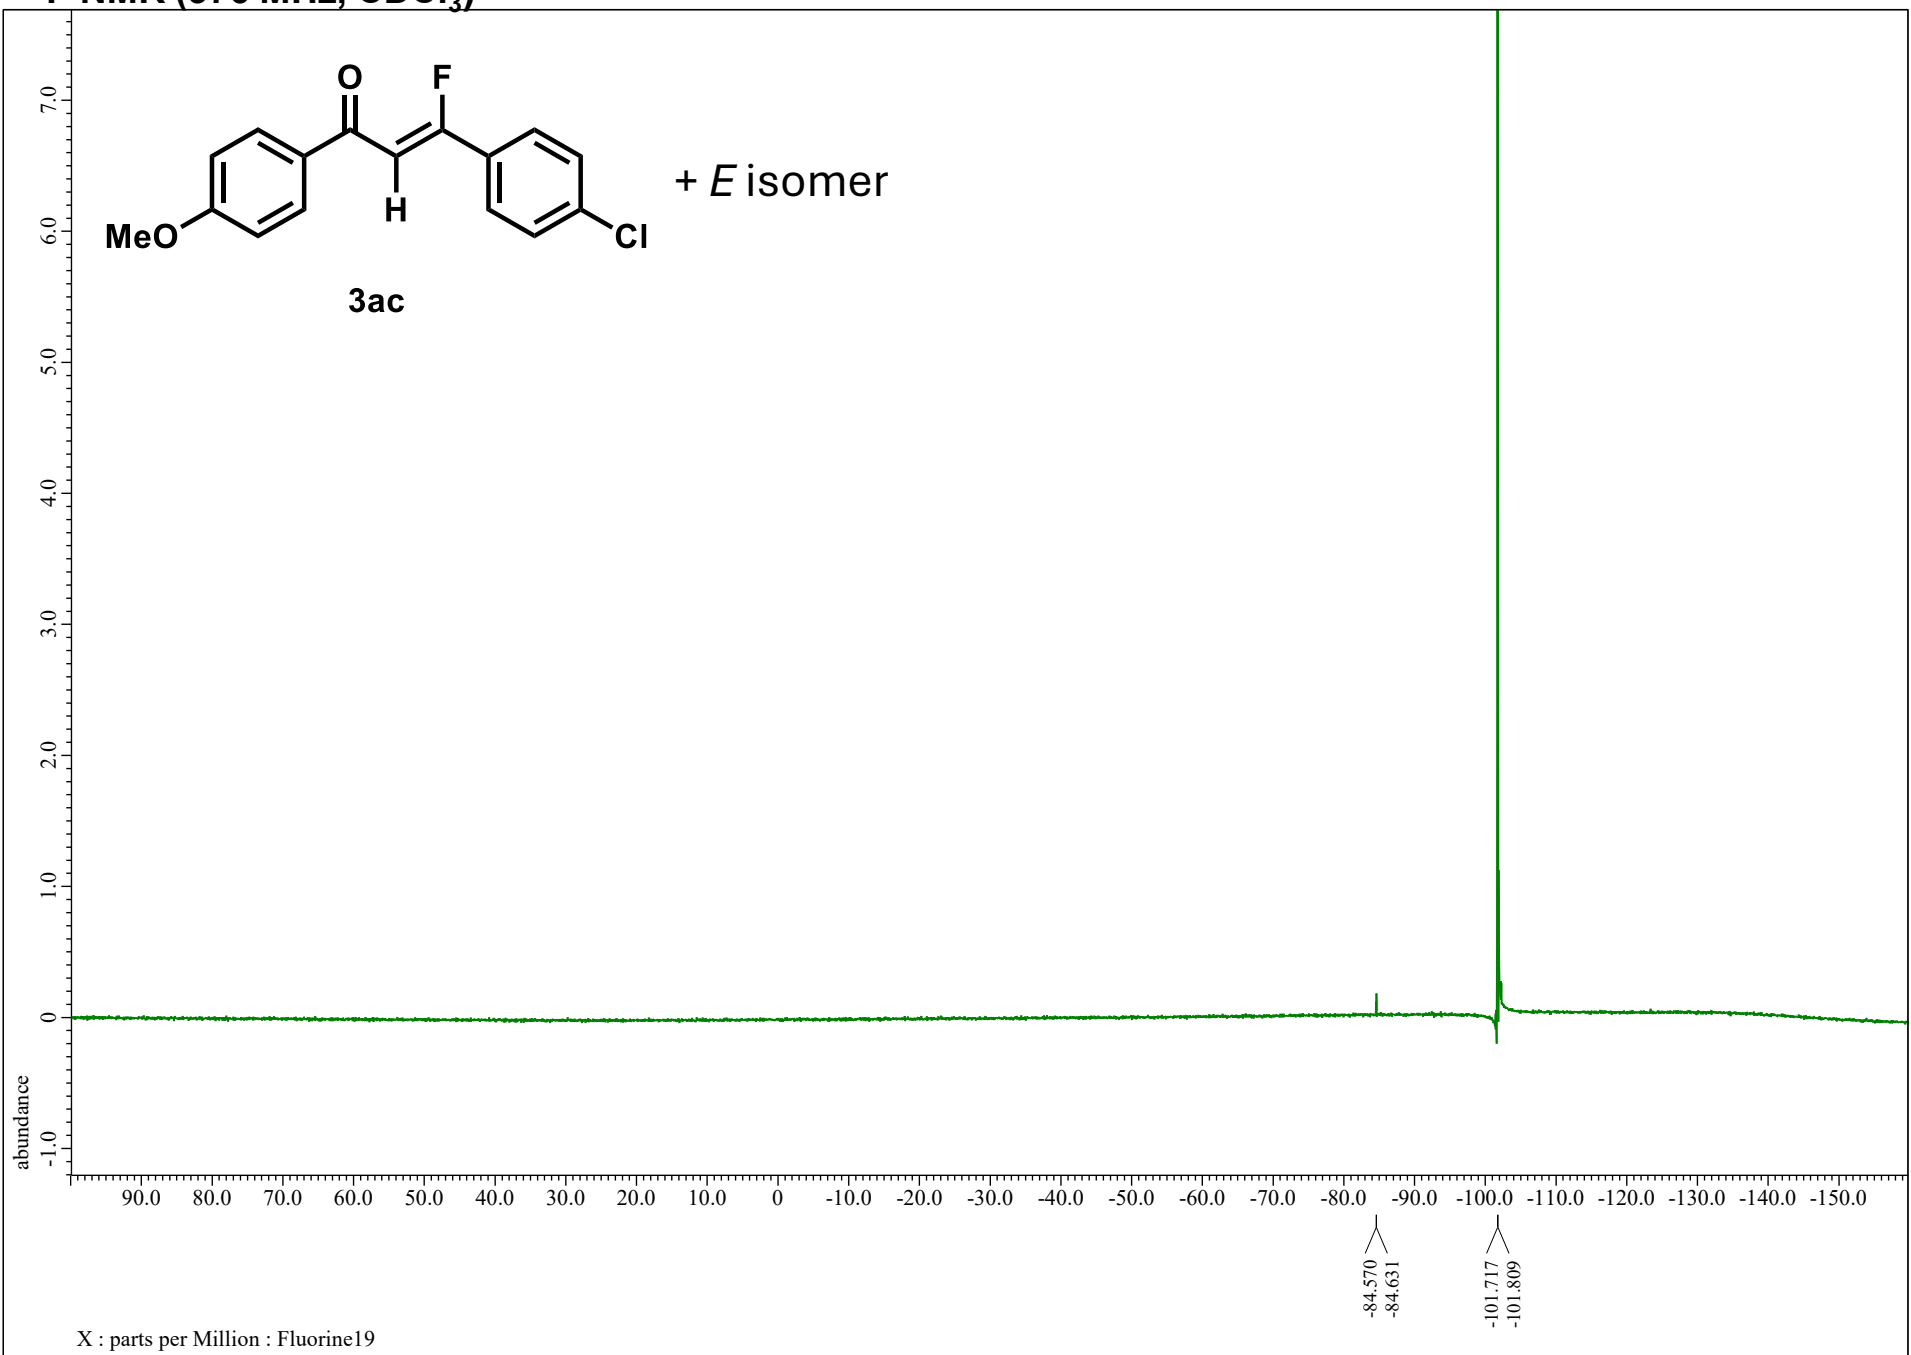

**<sup>1</sup>H NMR (400 MHz, CDCl<sub>3</sub>)**

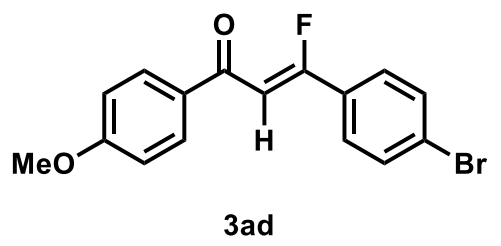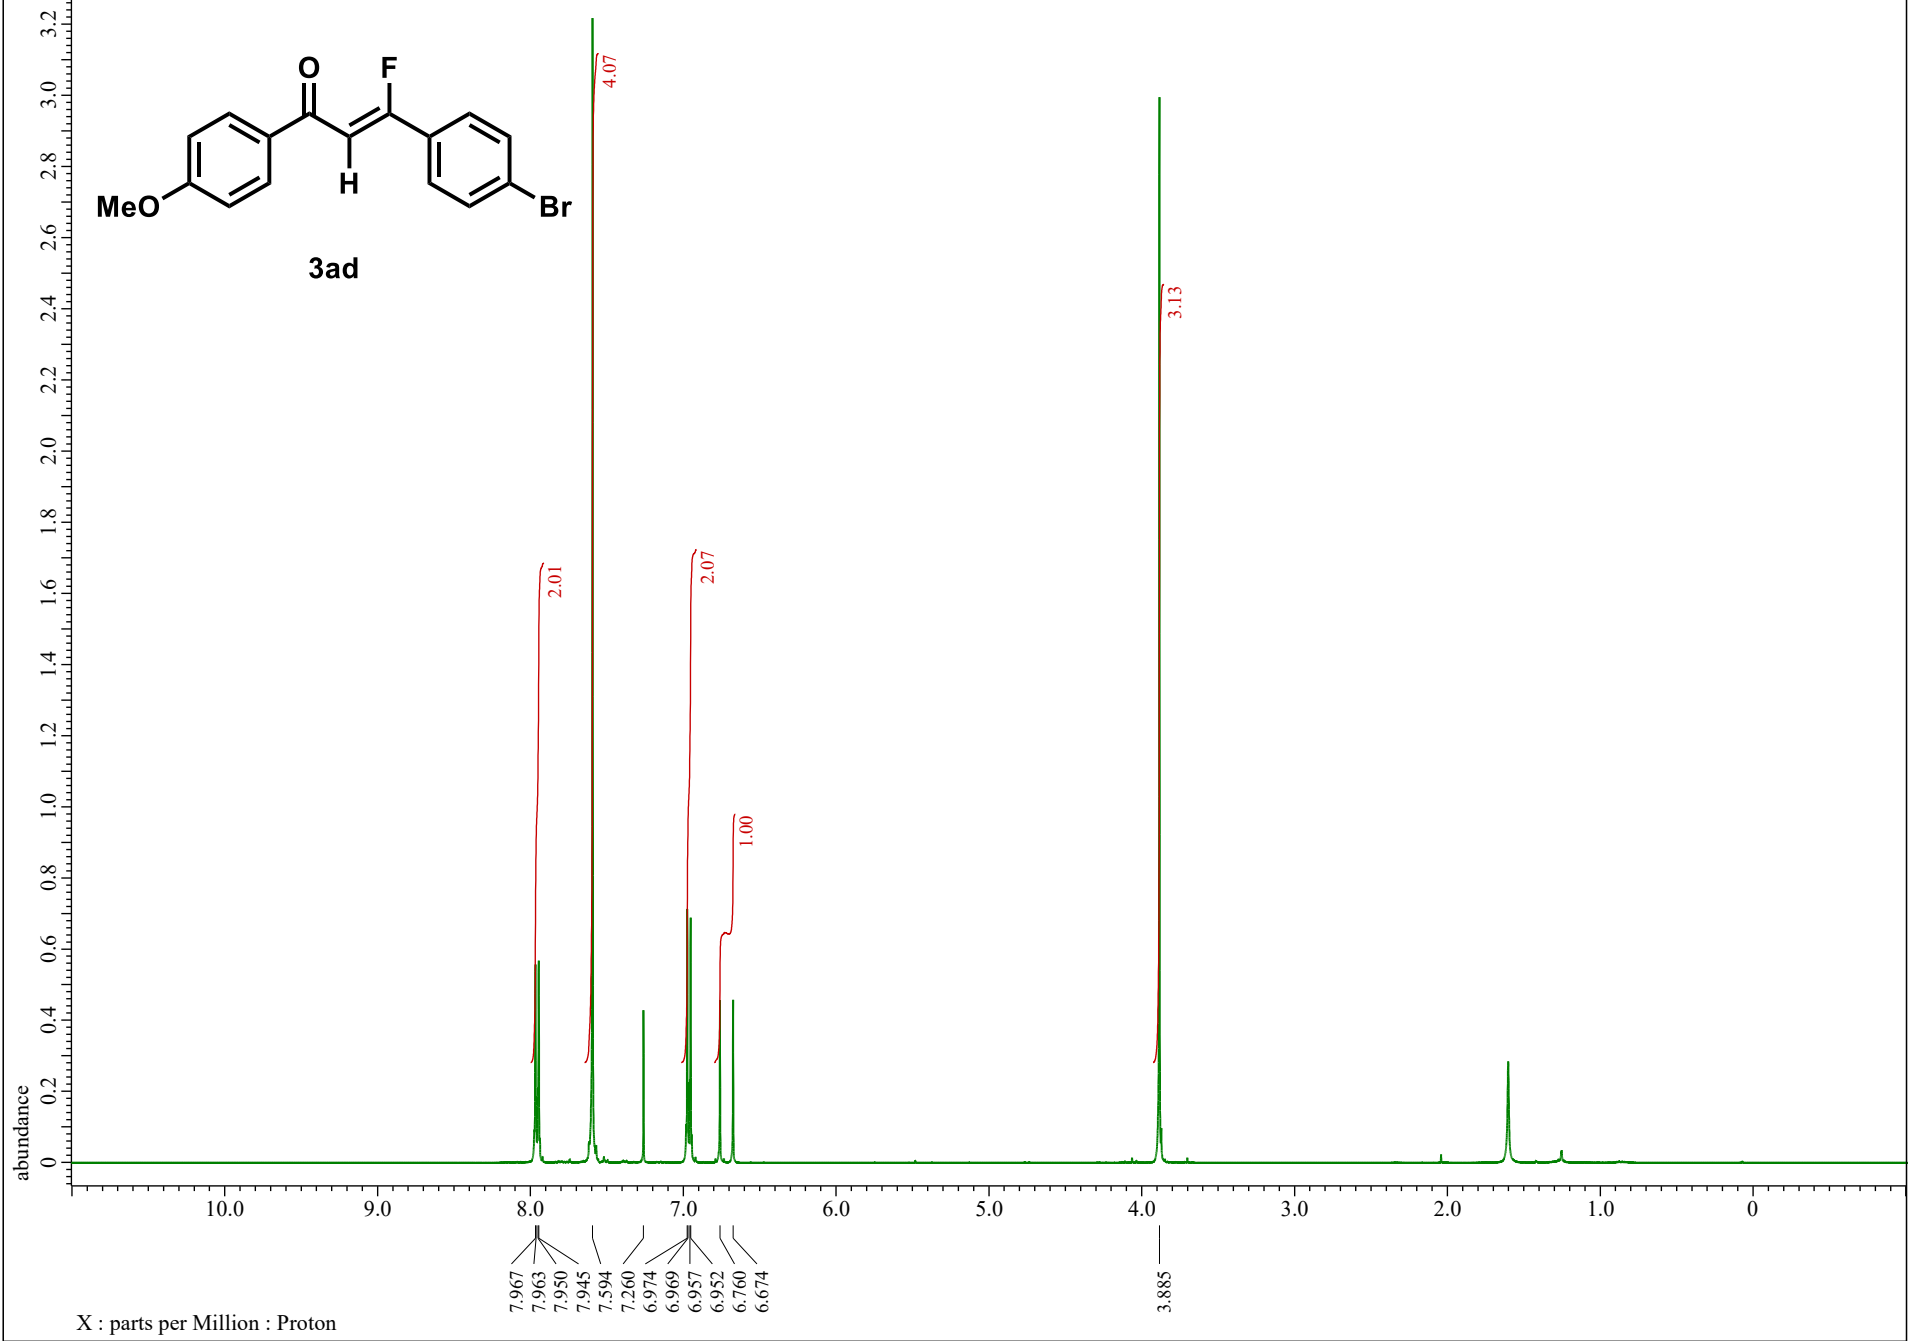

<sup>13</sup>C NMR (101 MHz, CDCl<sub>3</sub>)

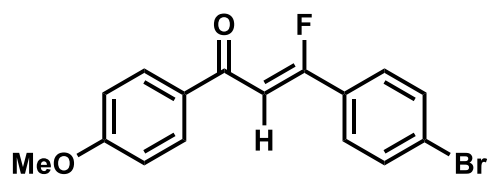

3ad

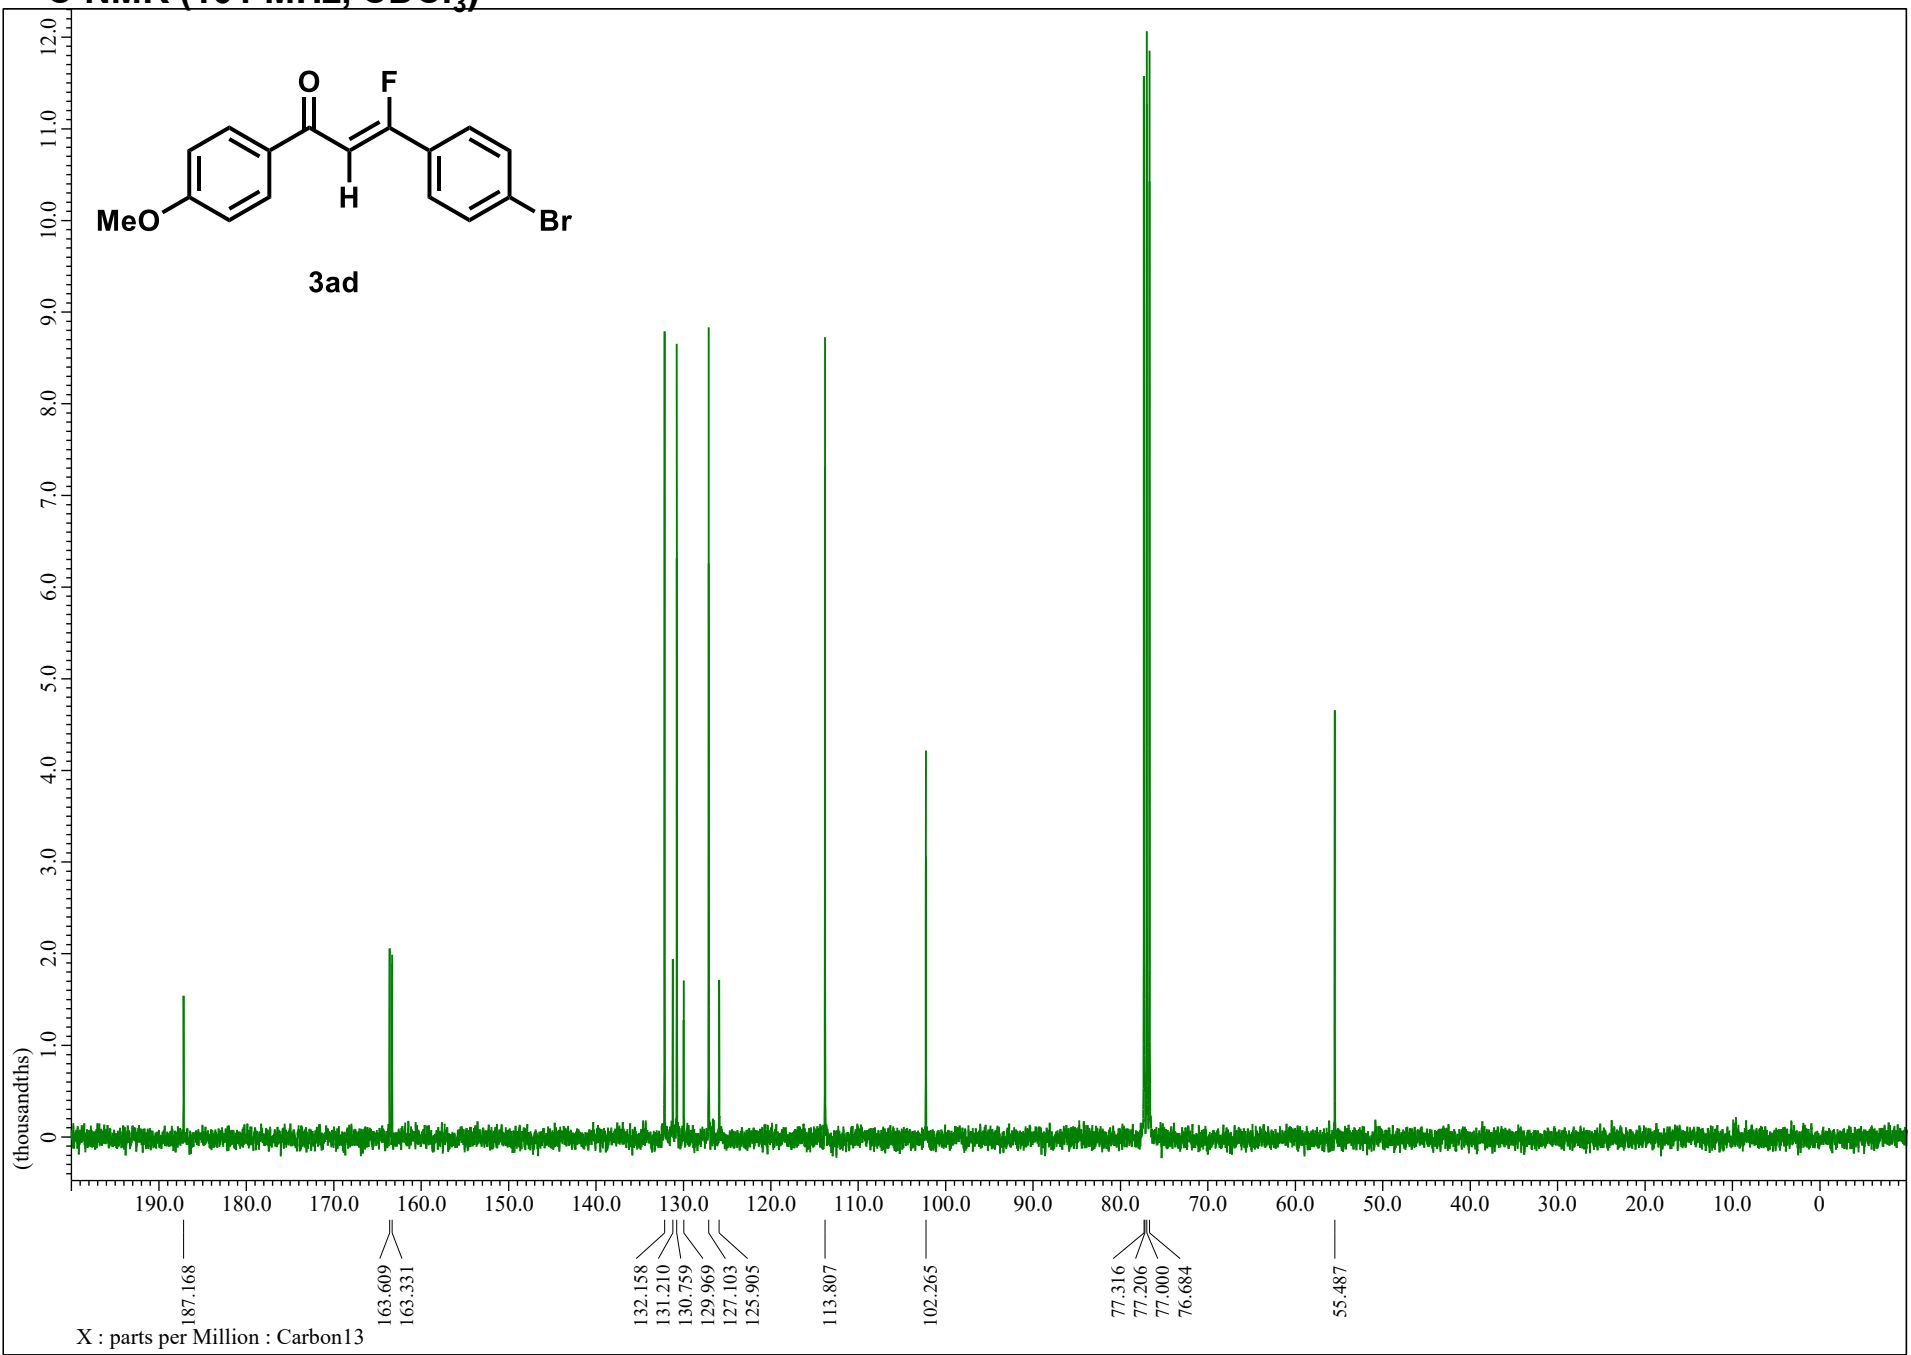

X : parts per Million : Carbon13

**<sup>19</sup>F NMR (376 MHz, CDCl<sub>3</sub>)**

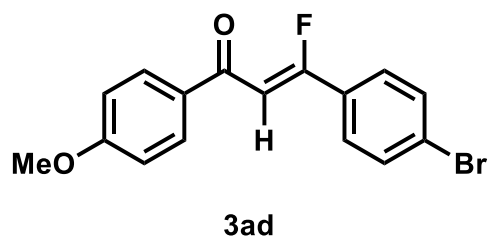

+ *E* isomer

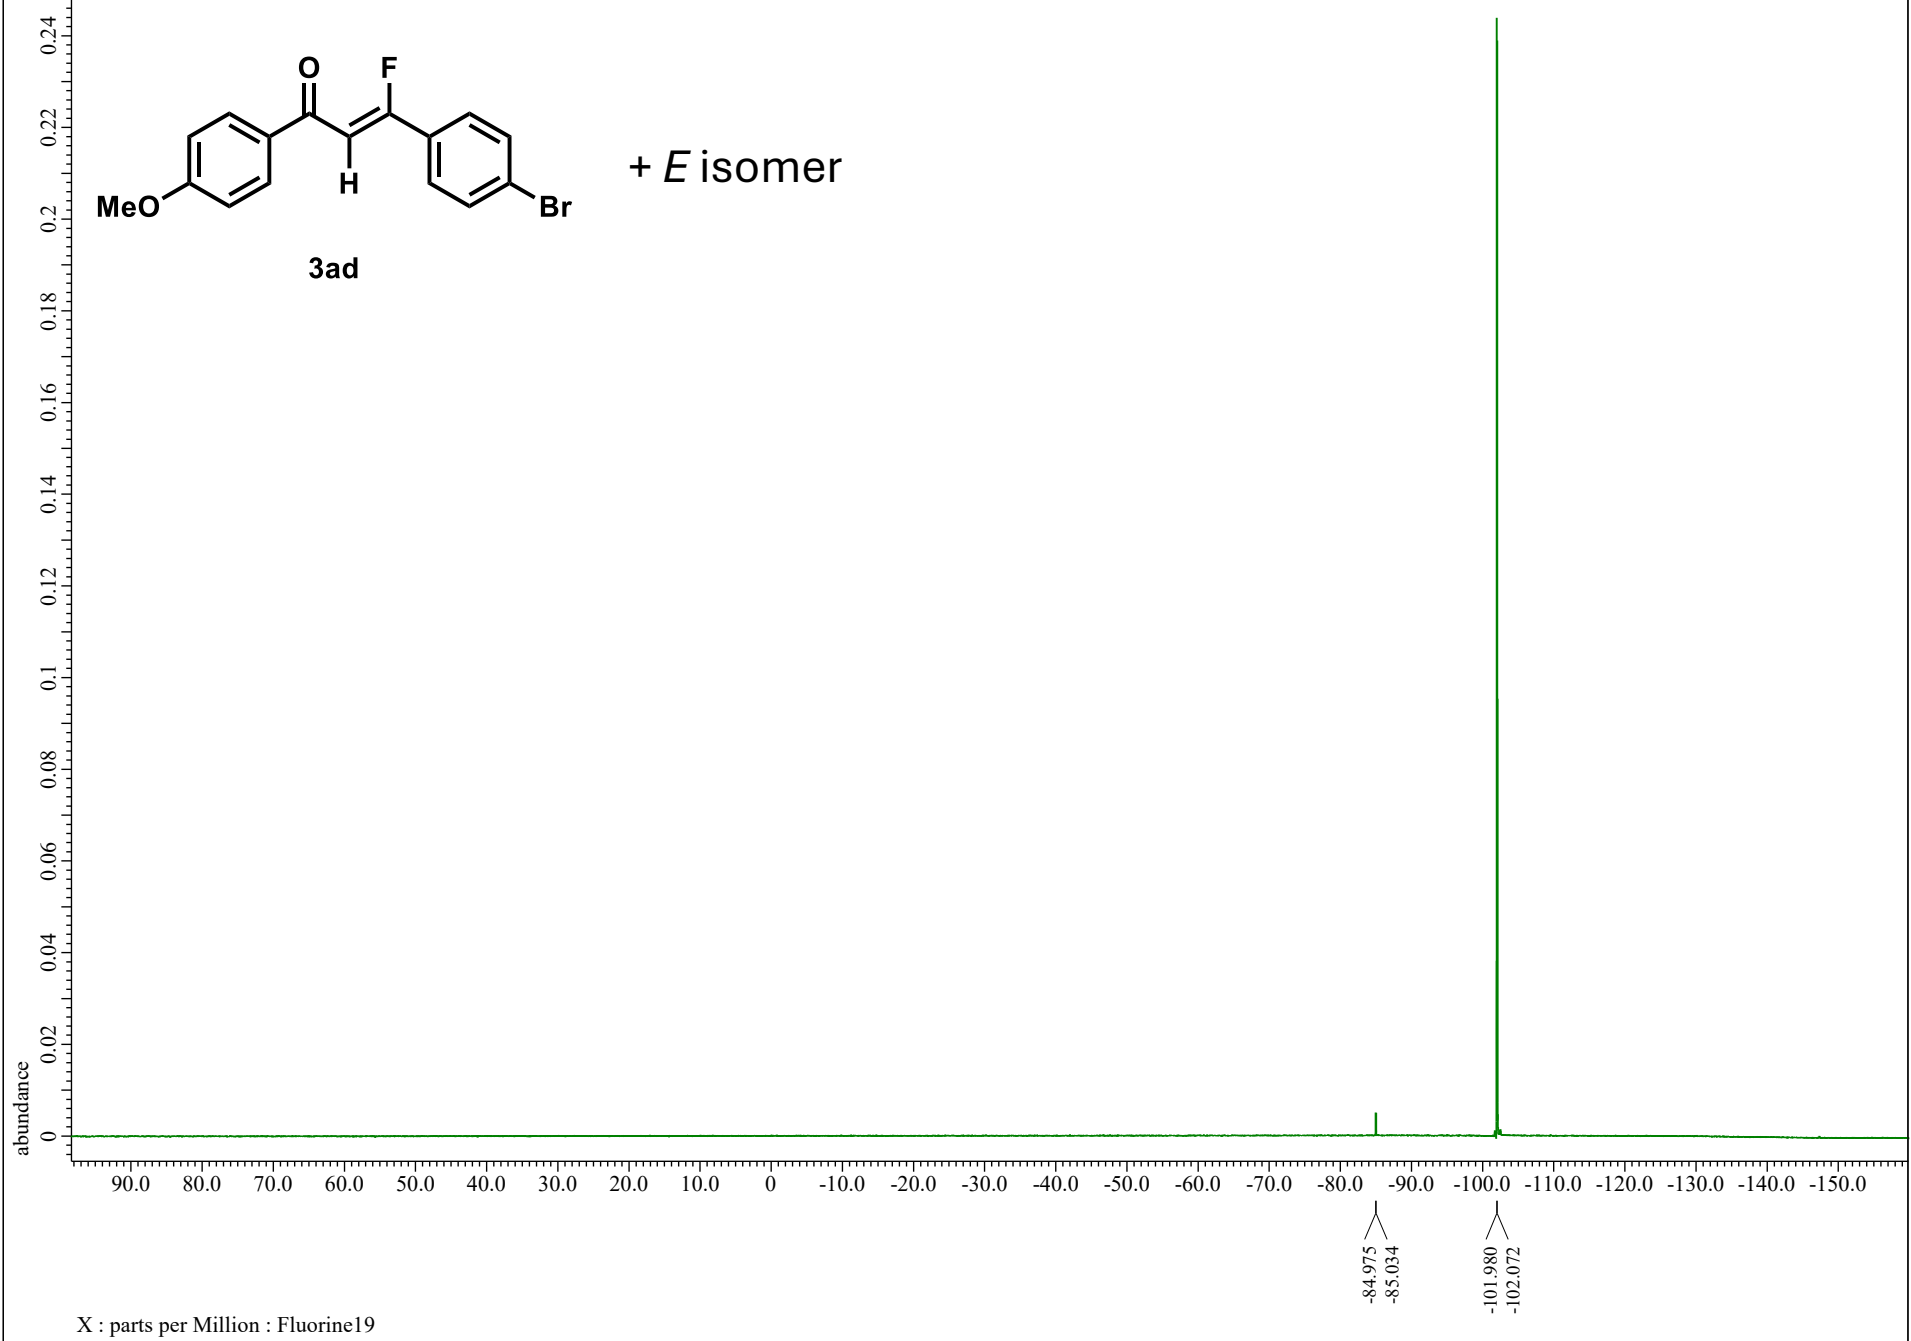

X : parts per Million : Fluorine19

<sup>1</sup>H NMR (400 MHz, CDCl<sub>3</sub>)

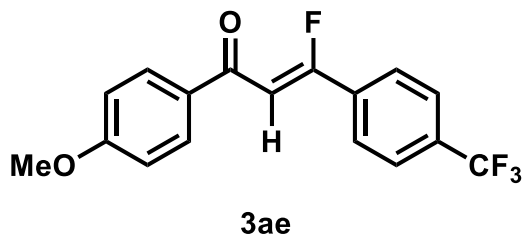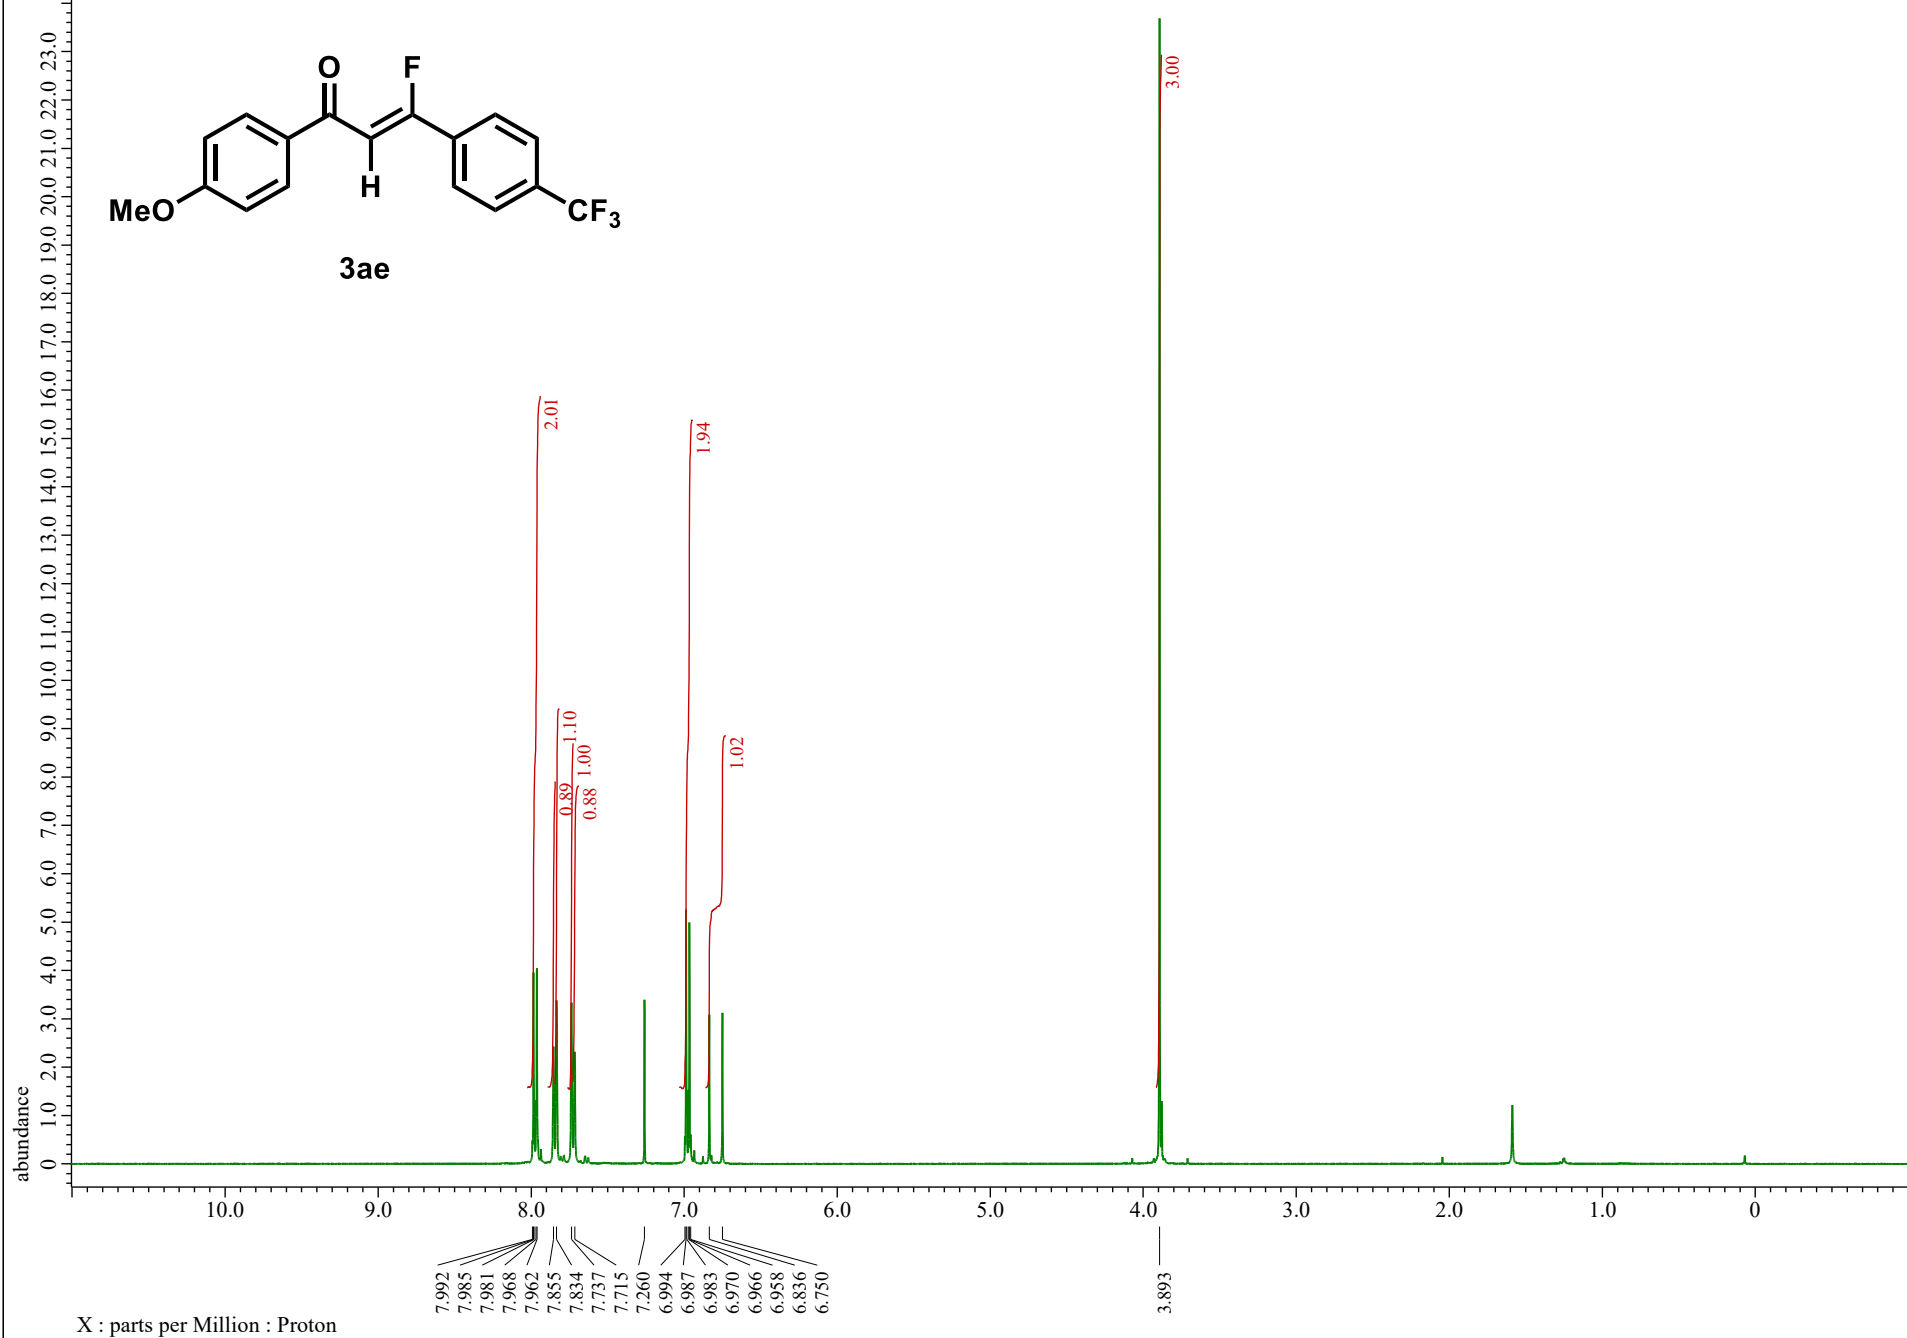

<sup>13</sup>C NMR (101 MHz, CDCl<sub>3</sub>)

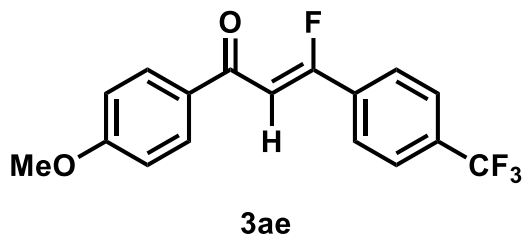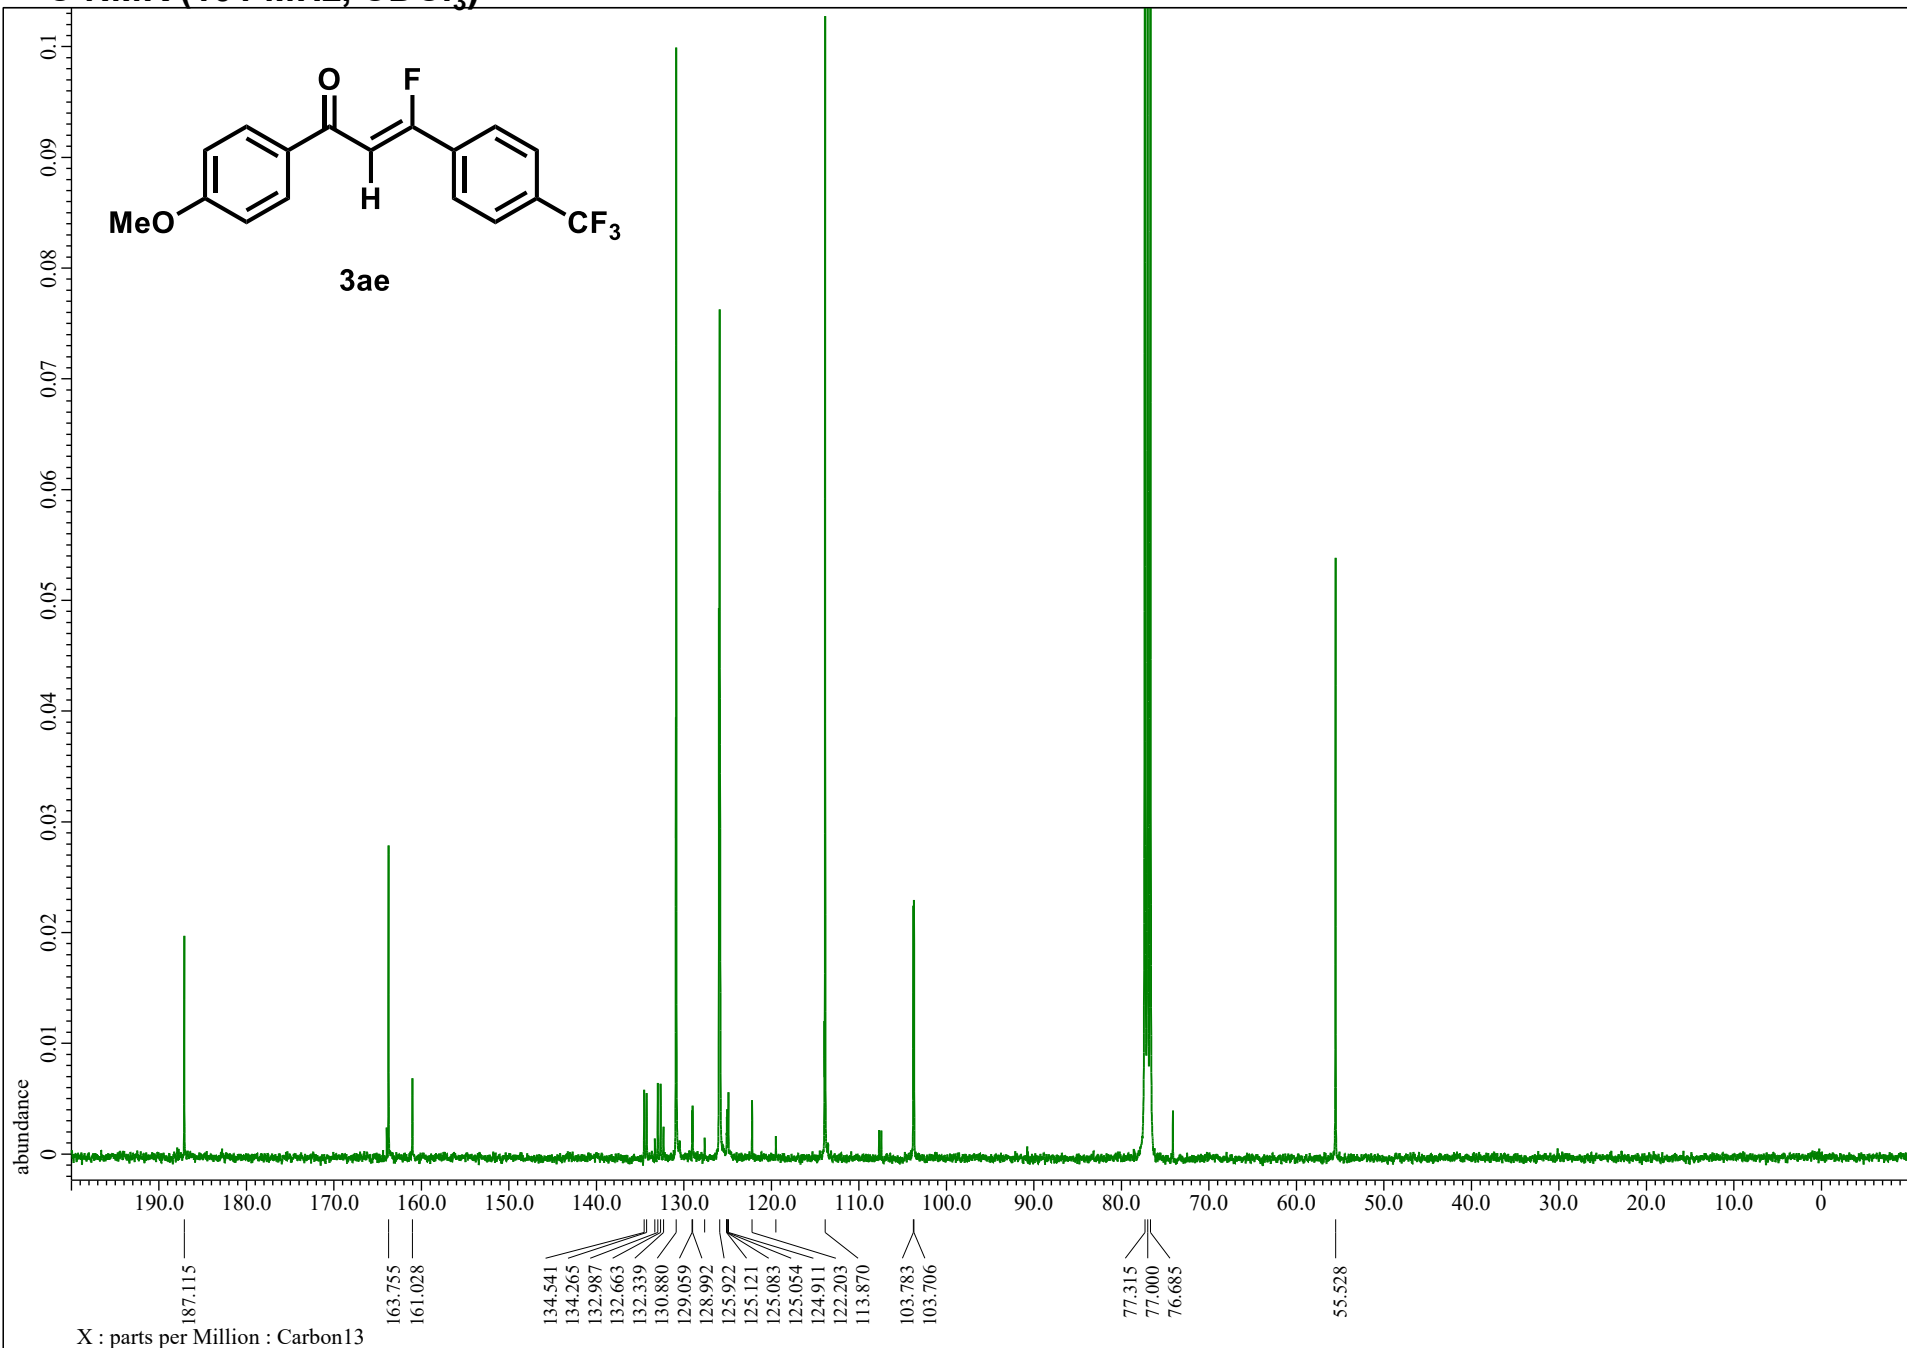

**<sup>19</sup>F NMR (376 MHz, CDCl<sub>3</sub>)**

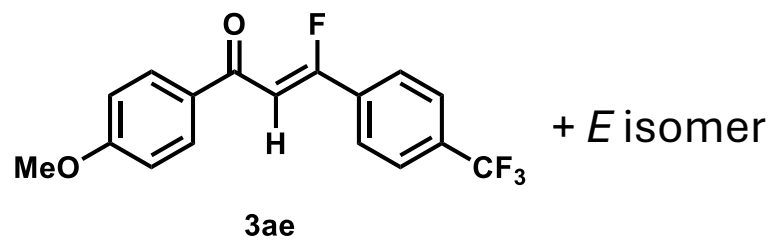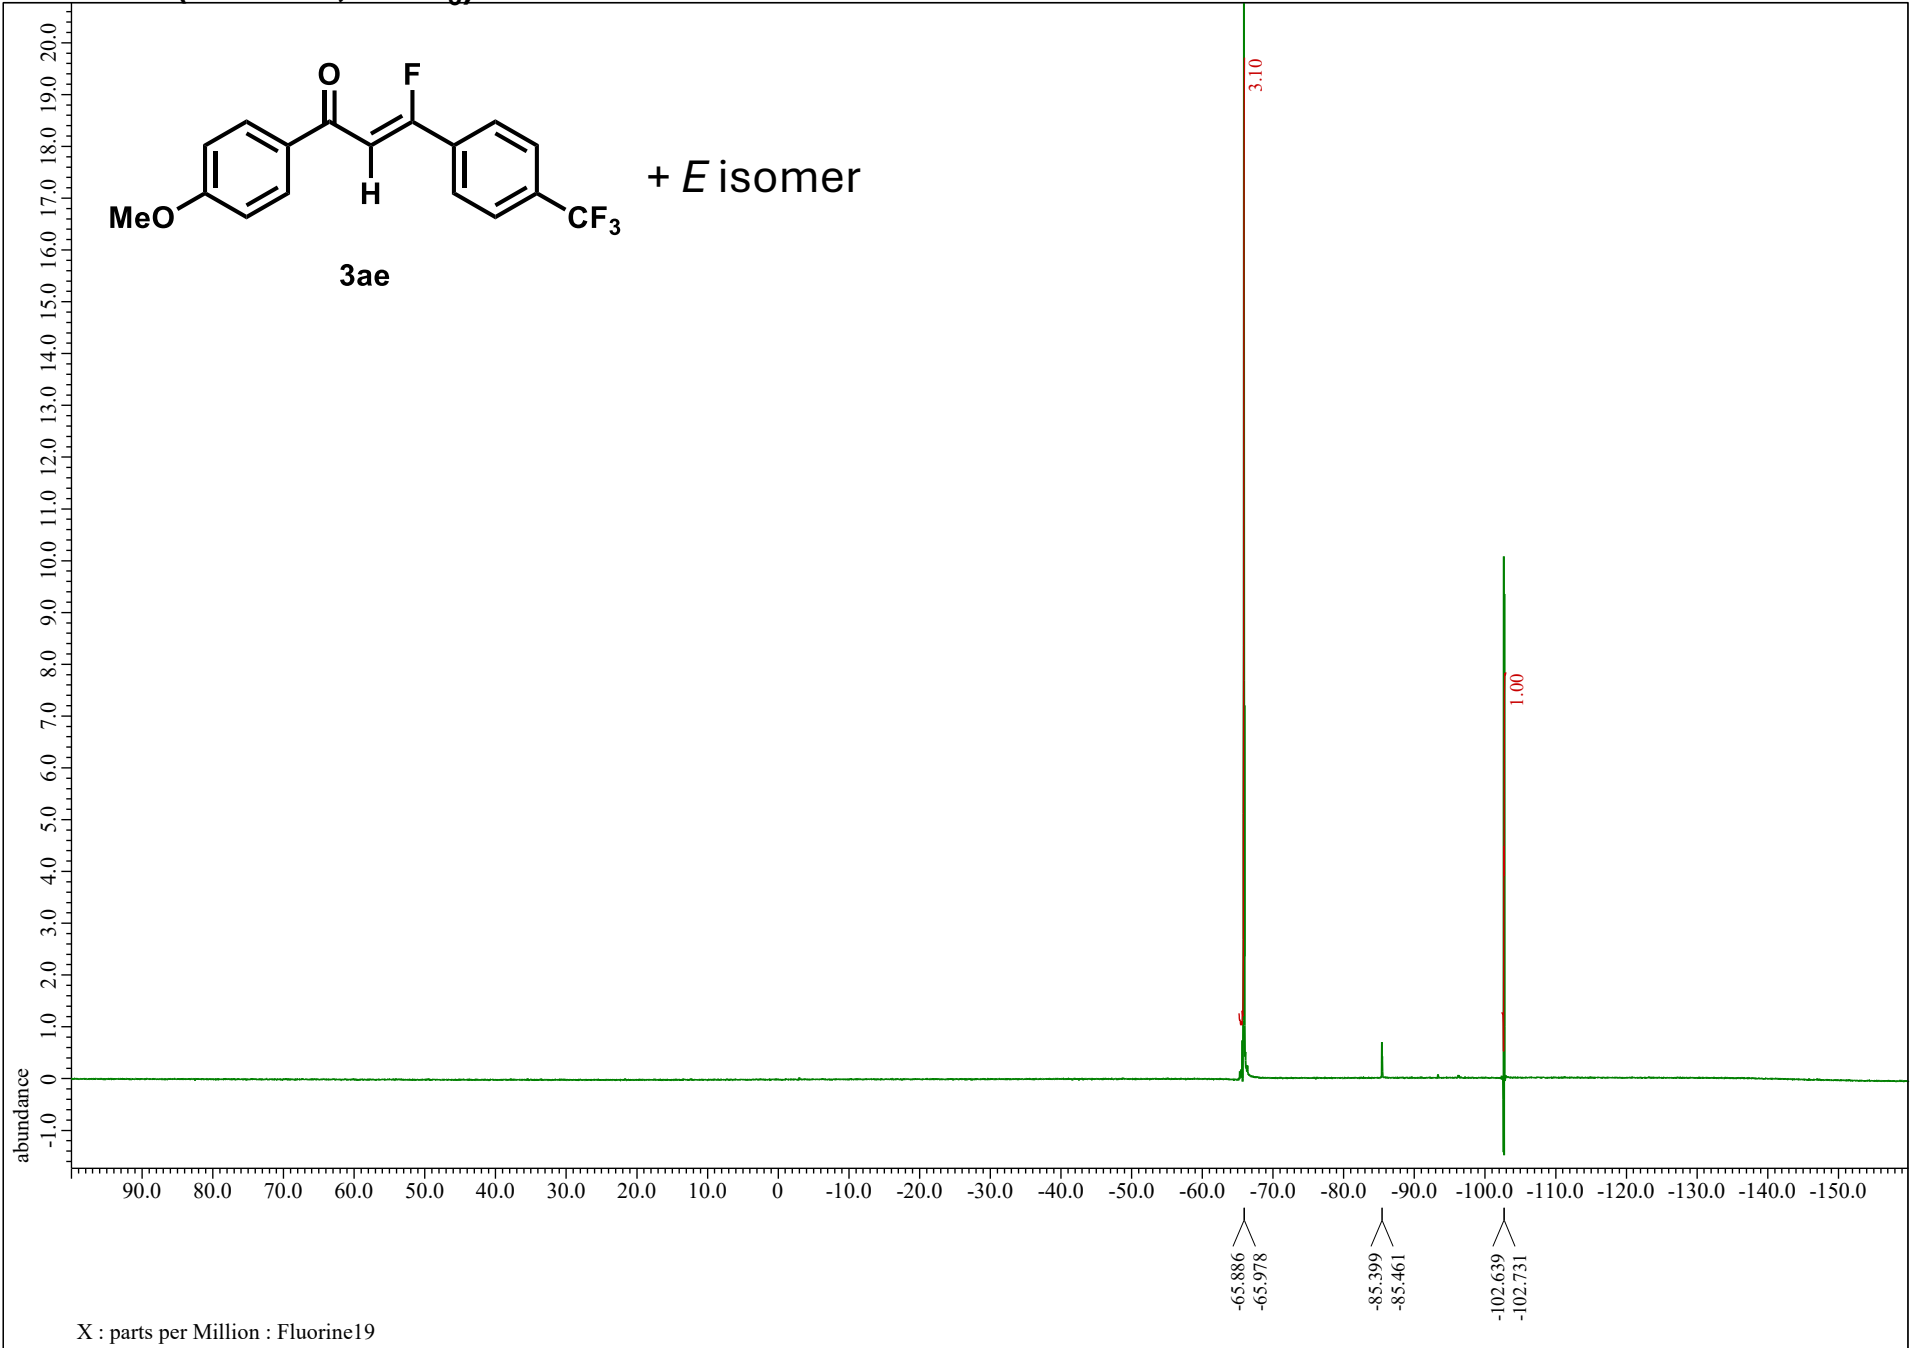

X : parts per Million : Fluorine19

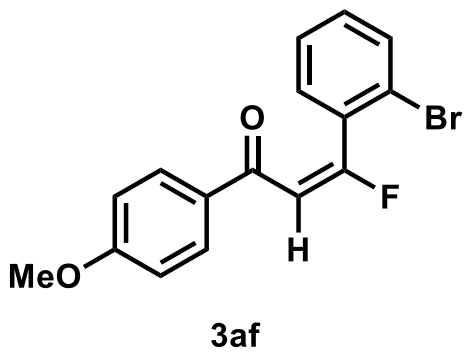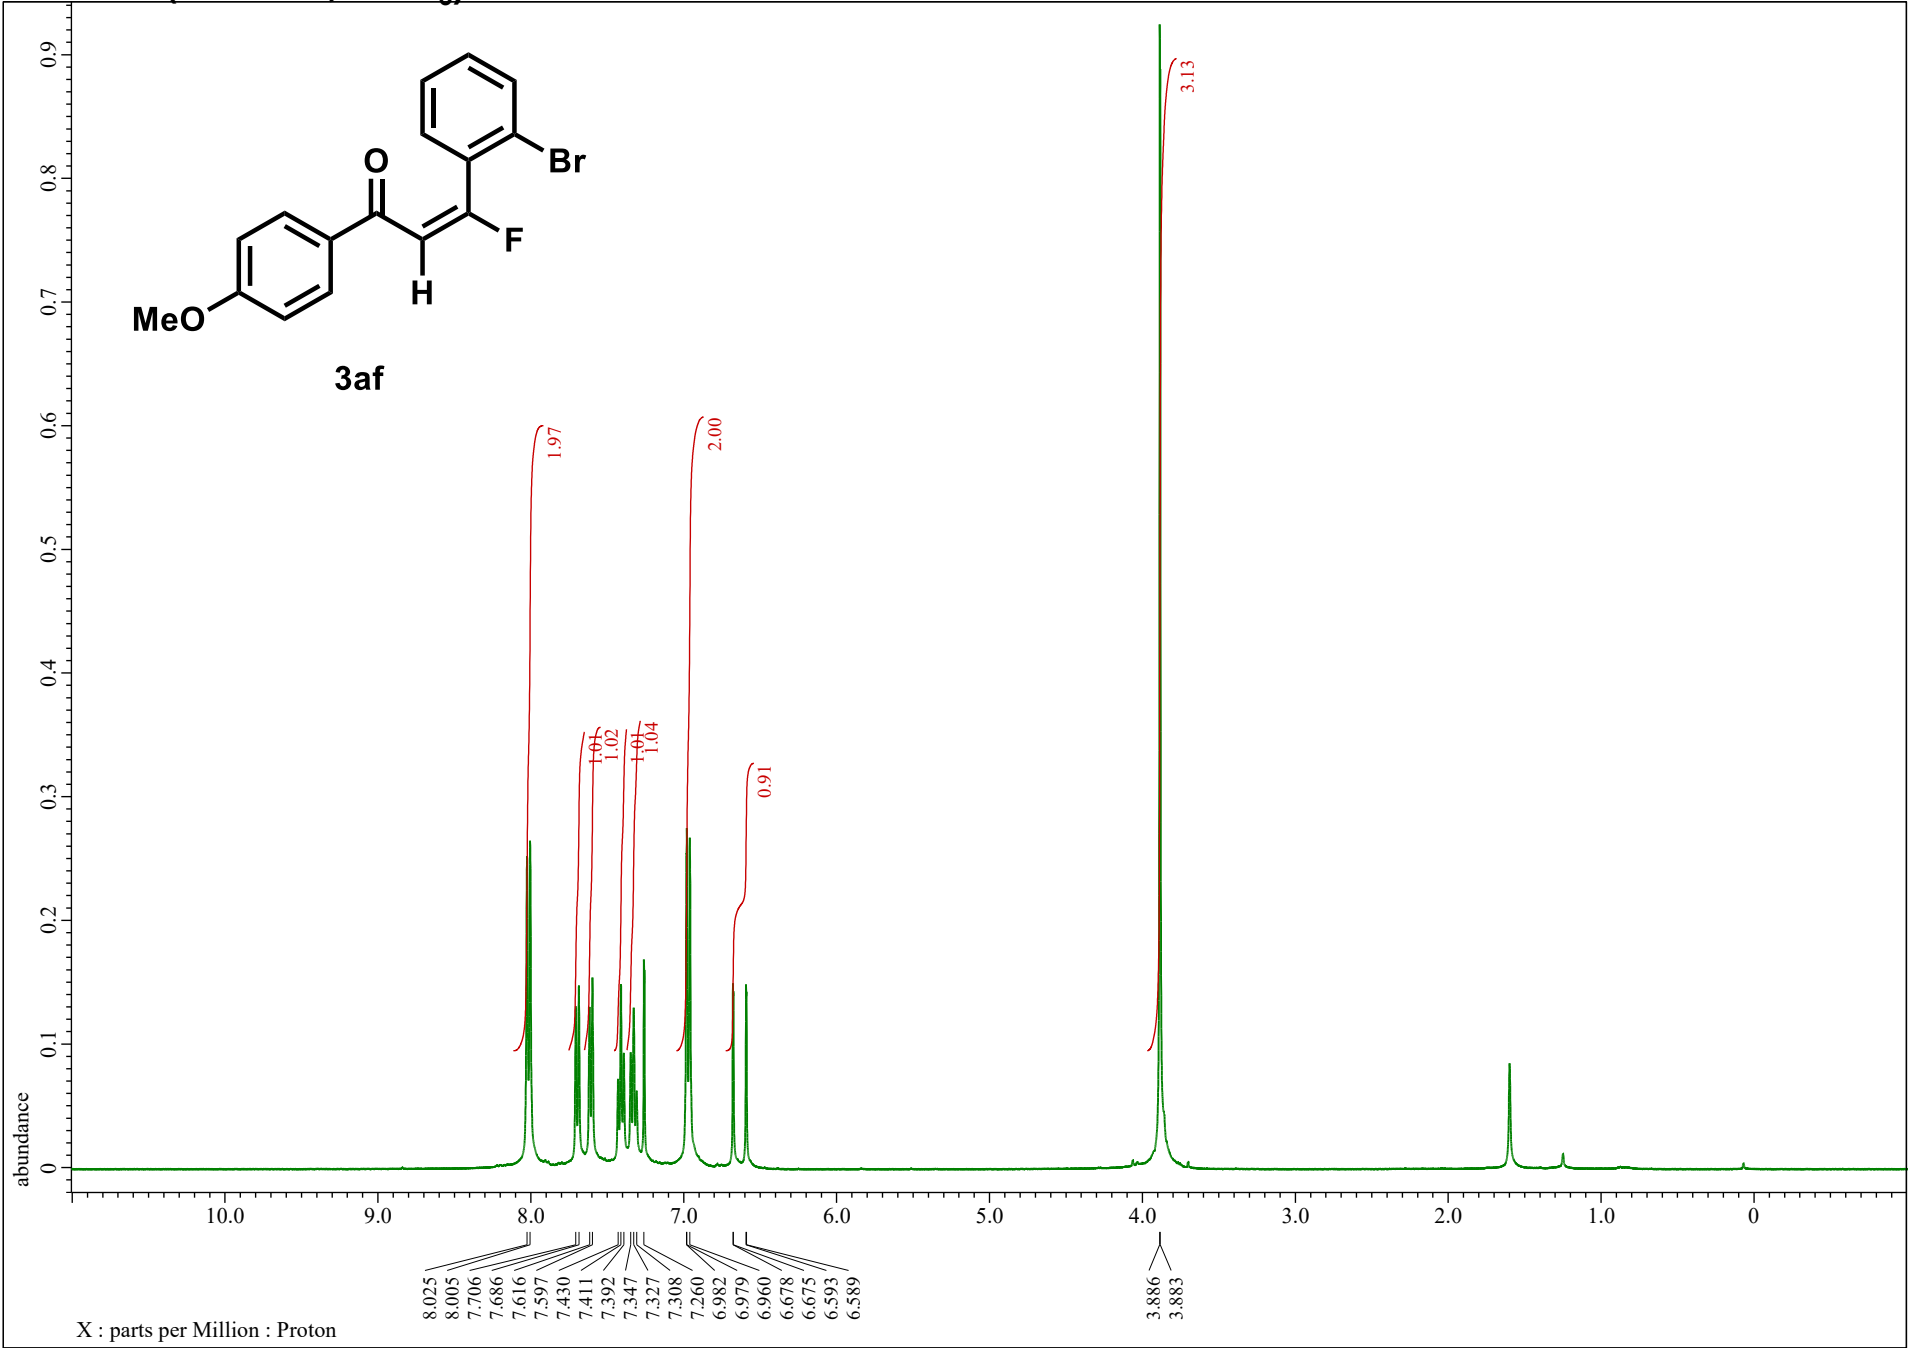

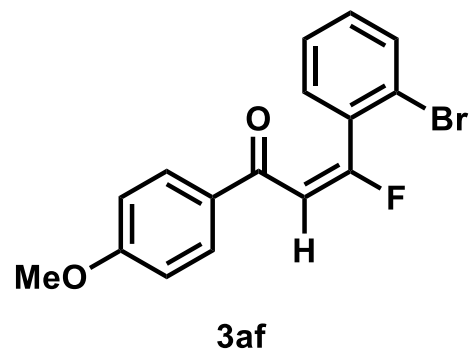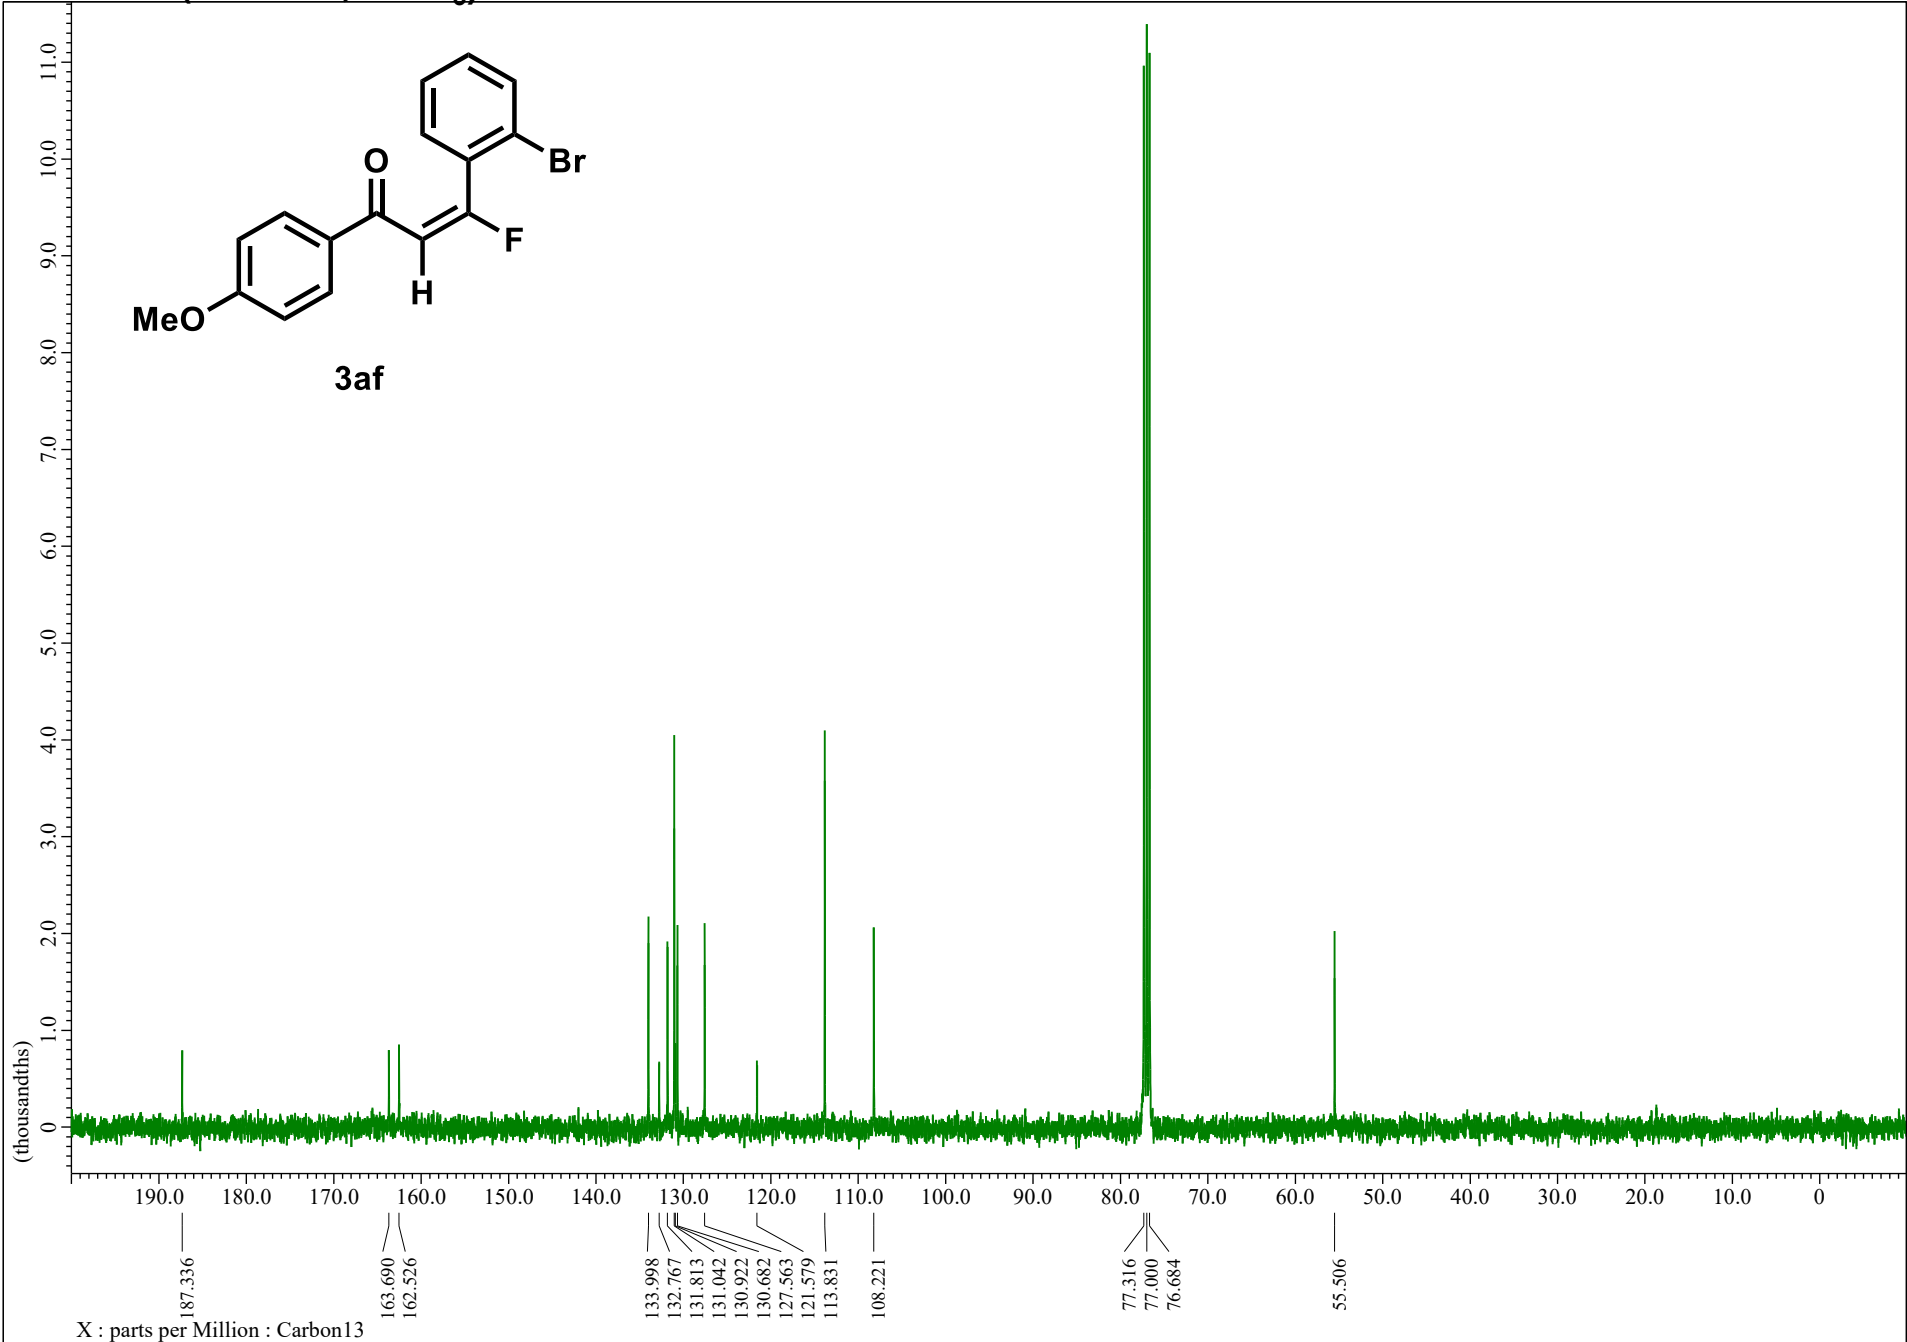

**<sup>19</sup>F NMR (376 MHz, CDCl<sub>3</sub>)**

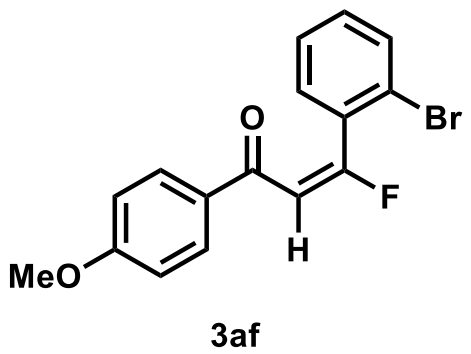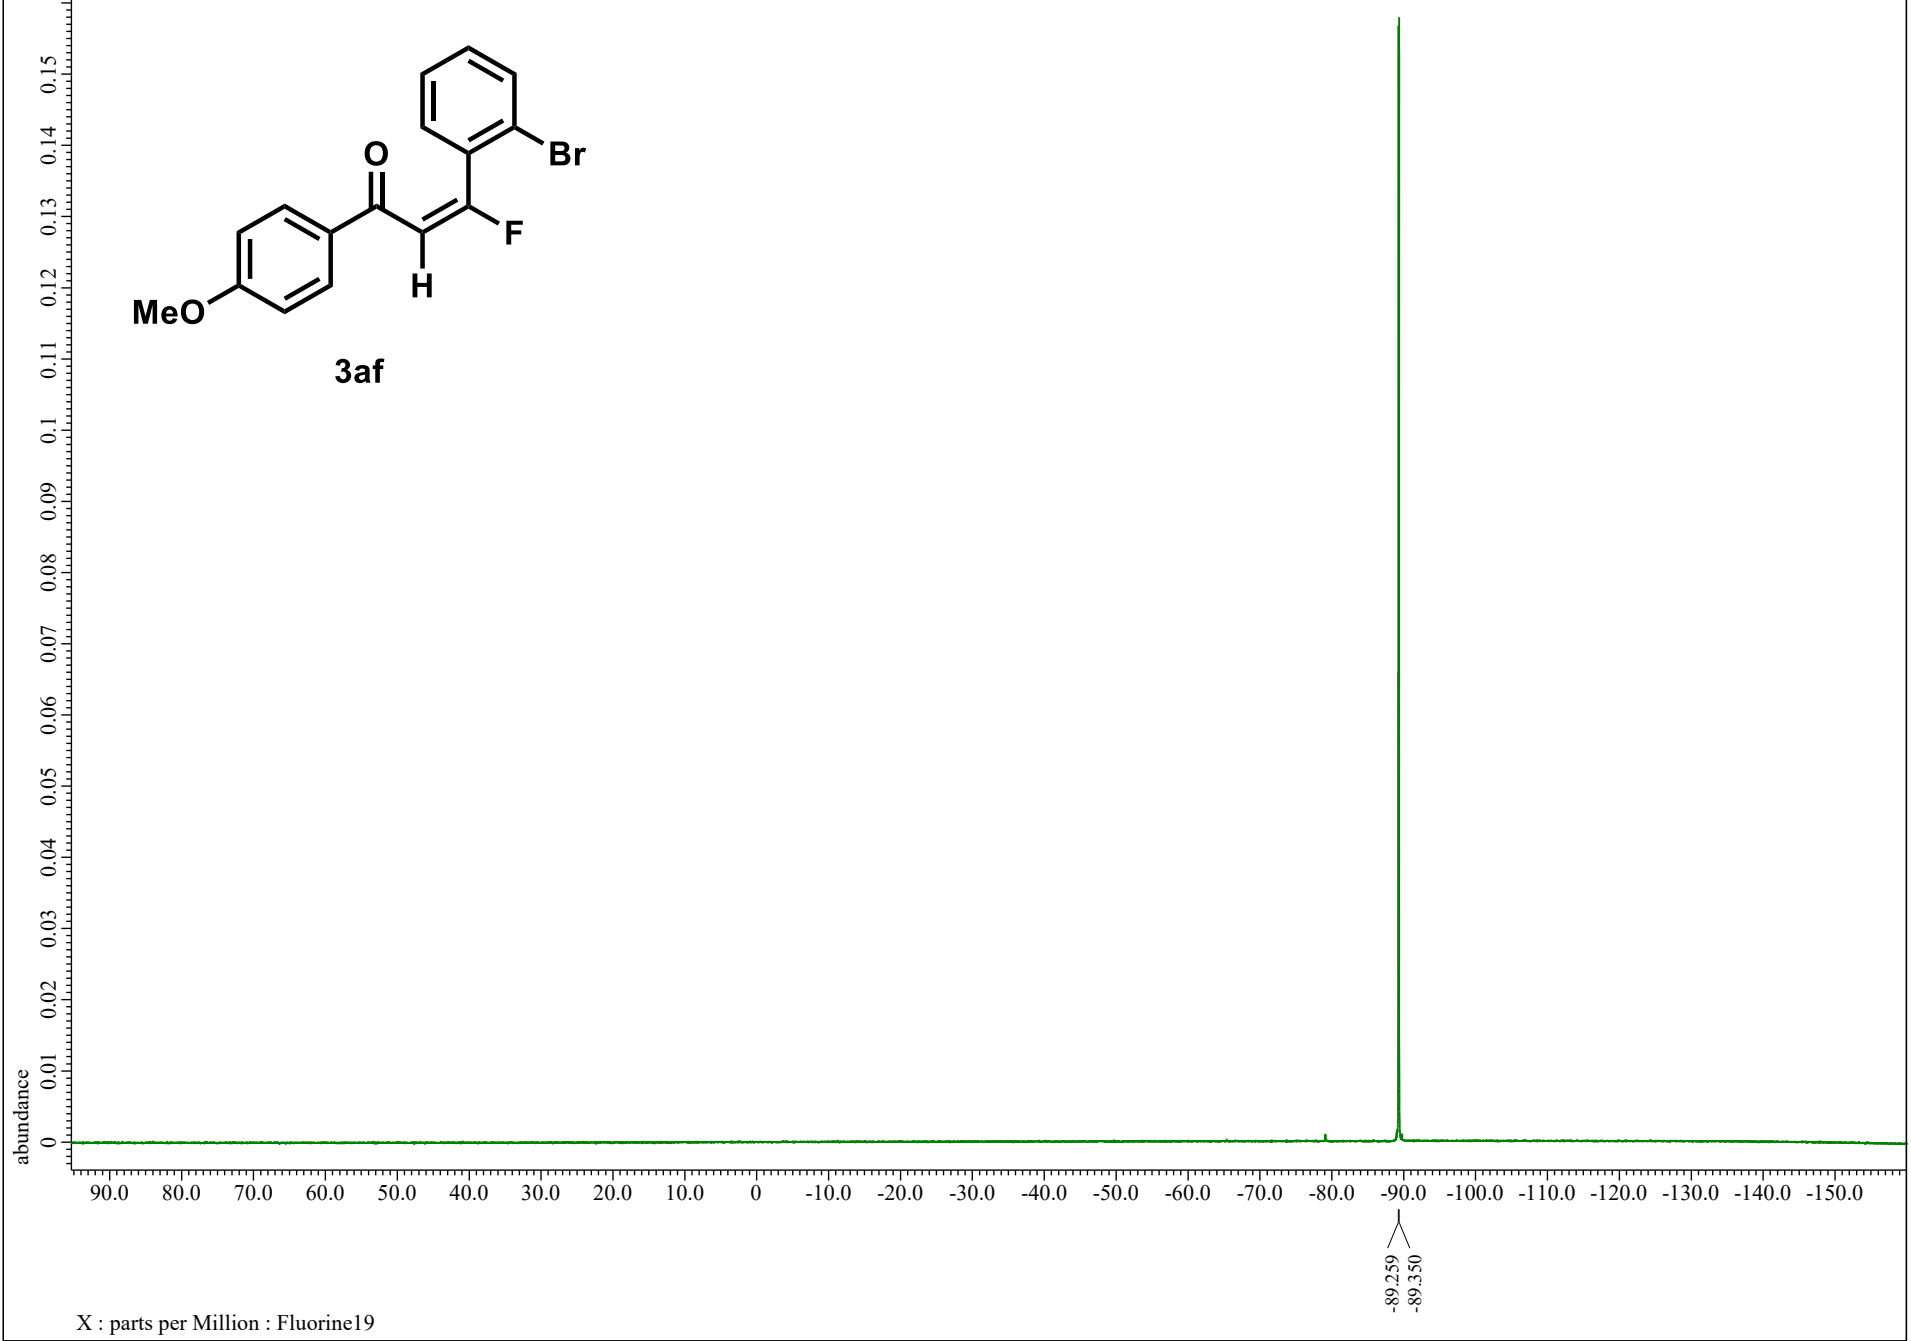

**$^1\text{H}$ - $^{19}\text{F}$  HOESY ( $\text{CDCl}_3$ )**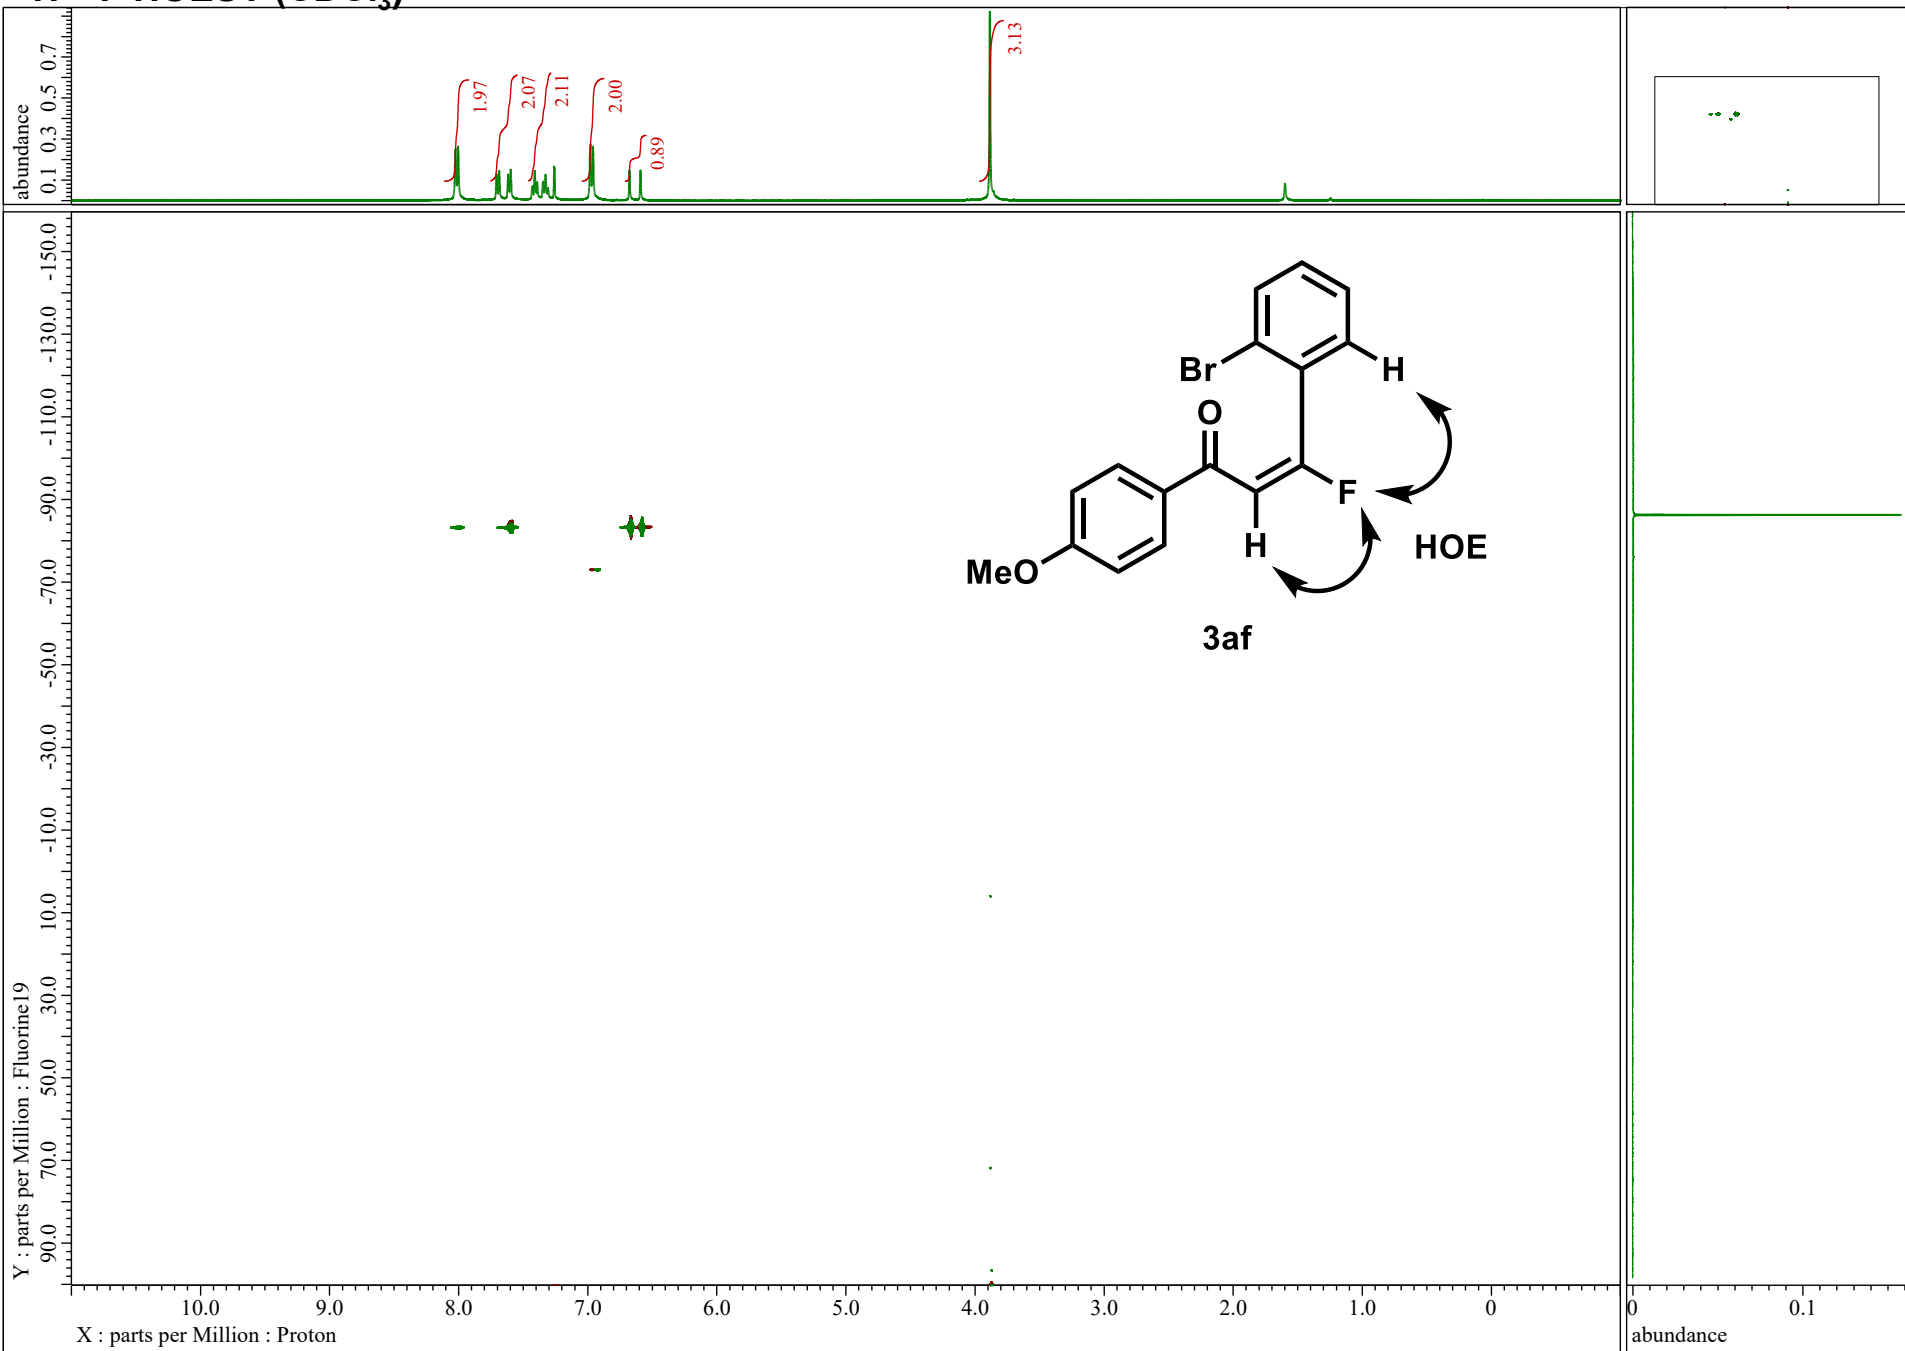

<sup>1</sup>H NMR (400 MHz, CDCl<sub>3</sub>)

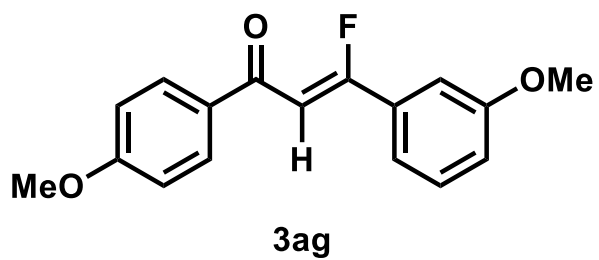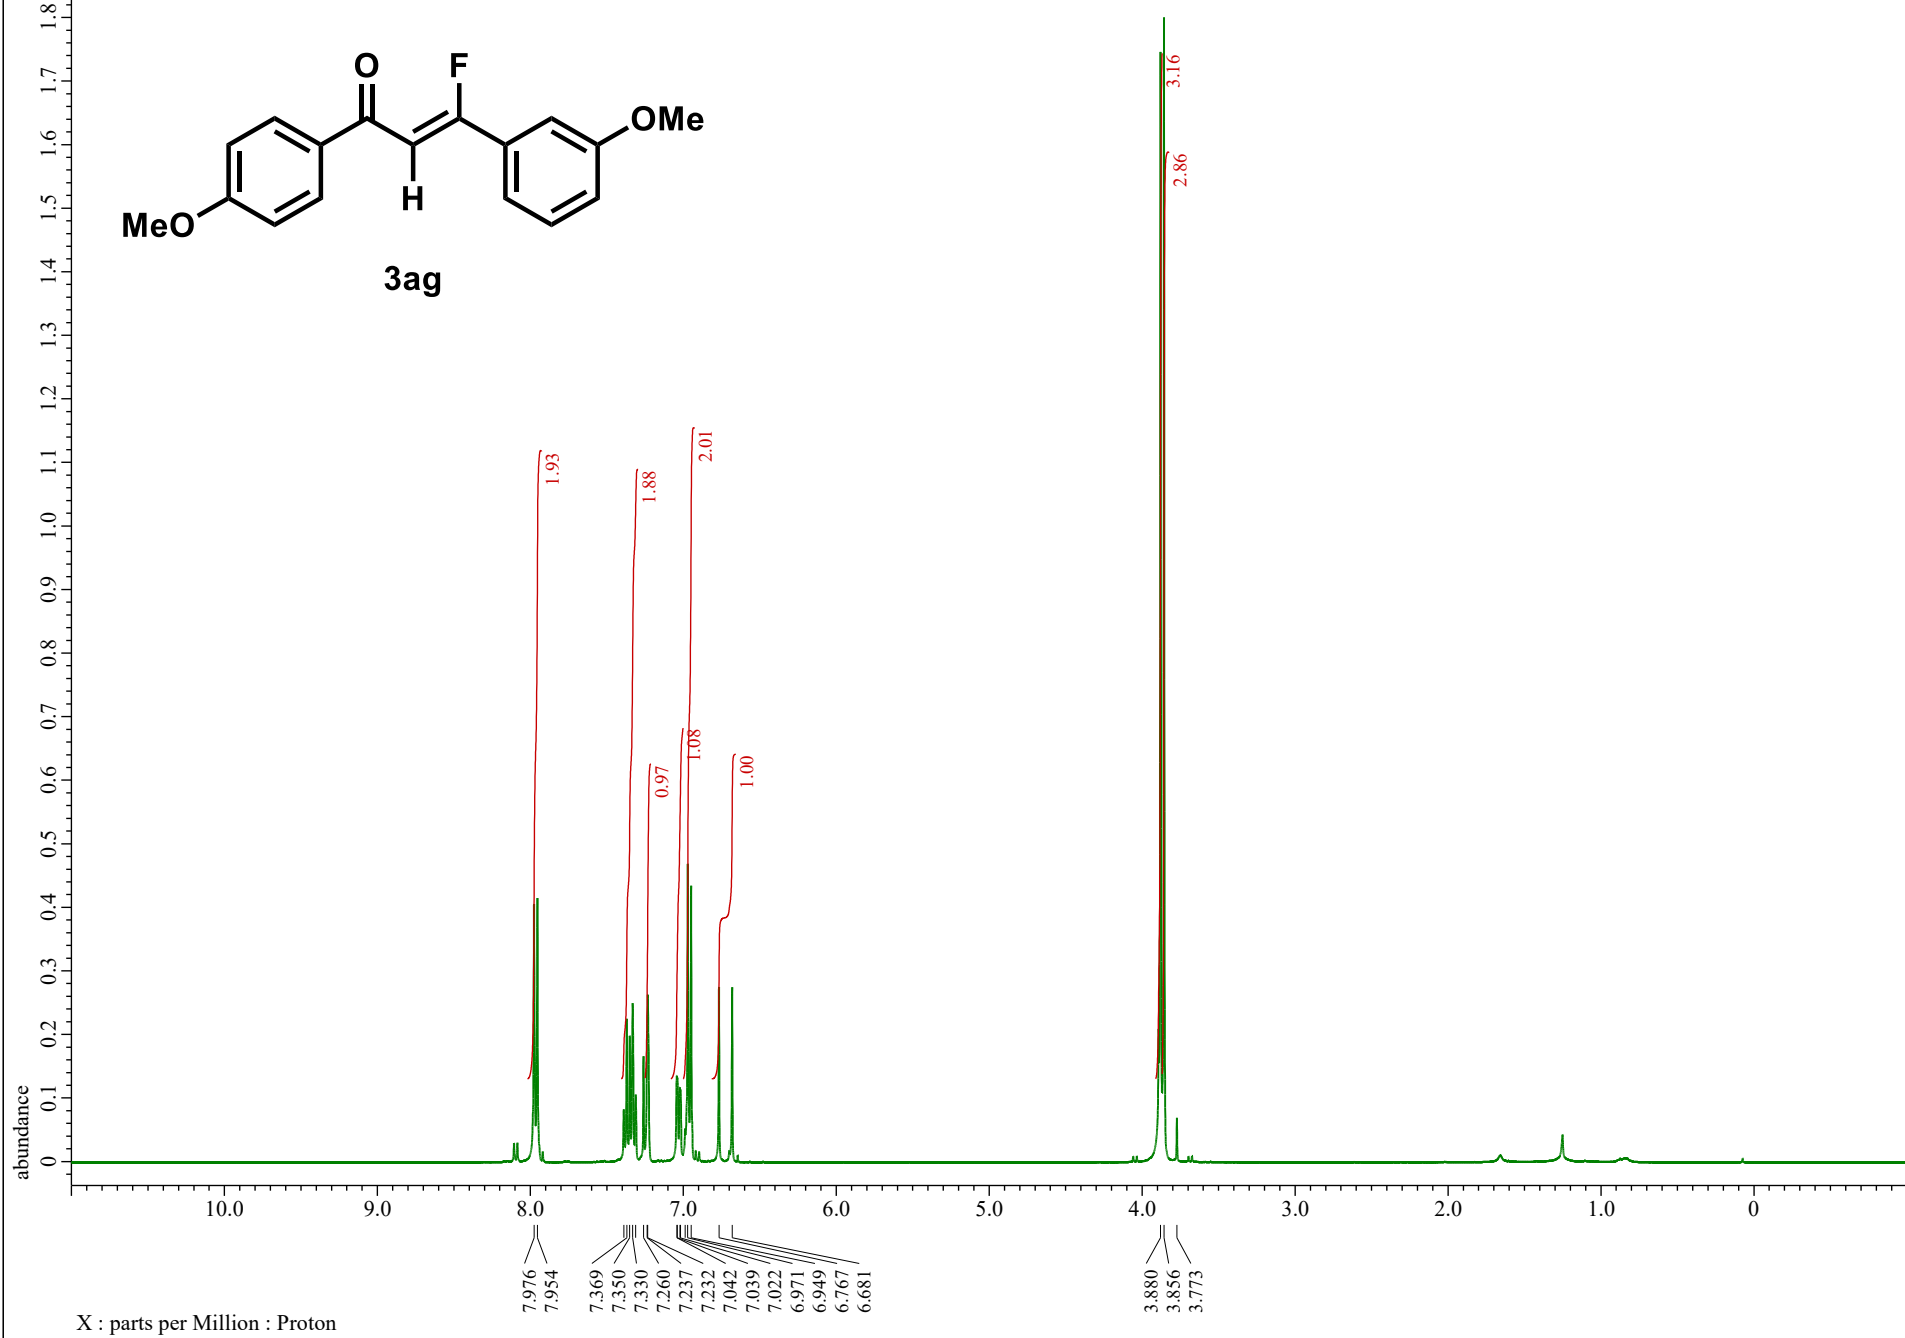

<sup>13</sup>C NMR (101 MHz, CDCl<sub>3</sub>)

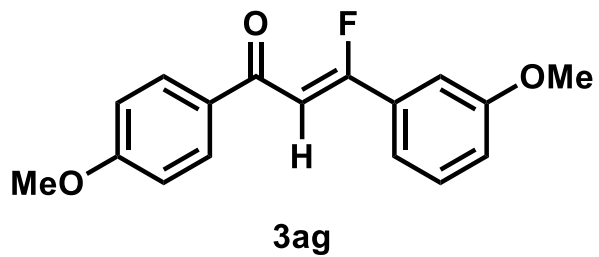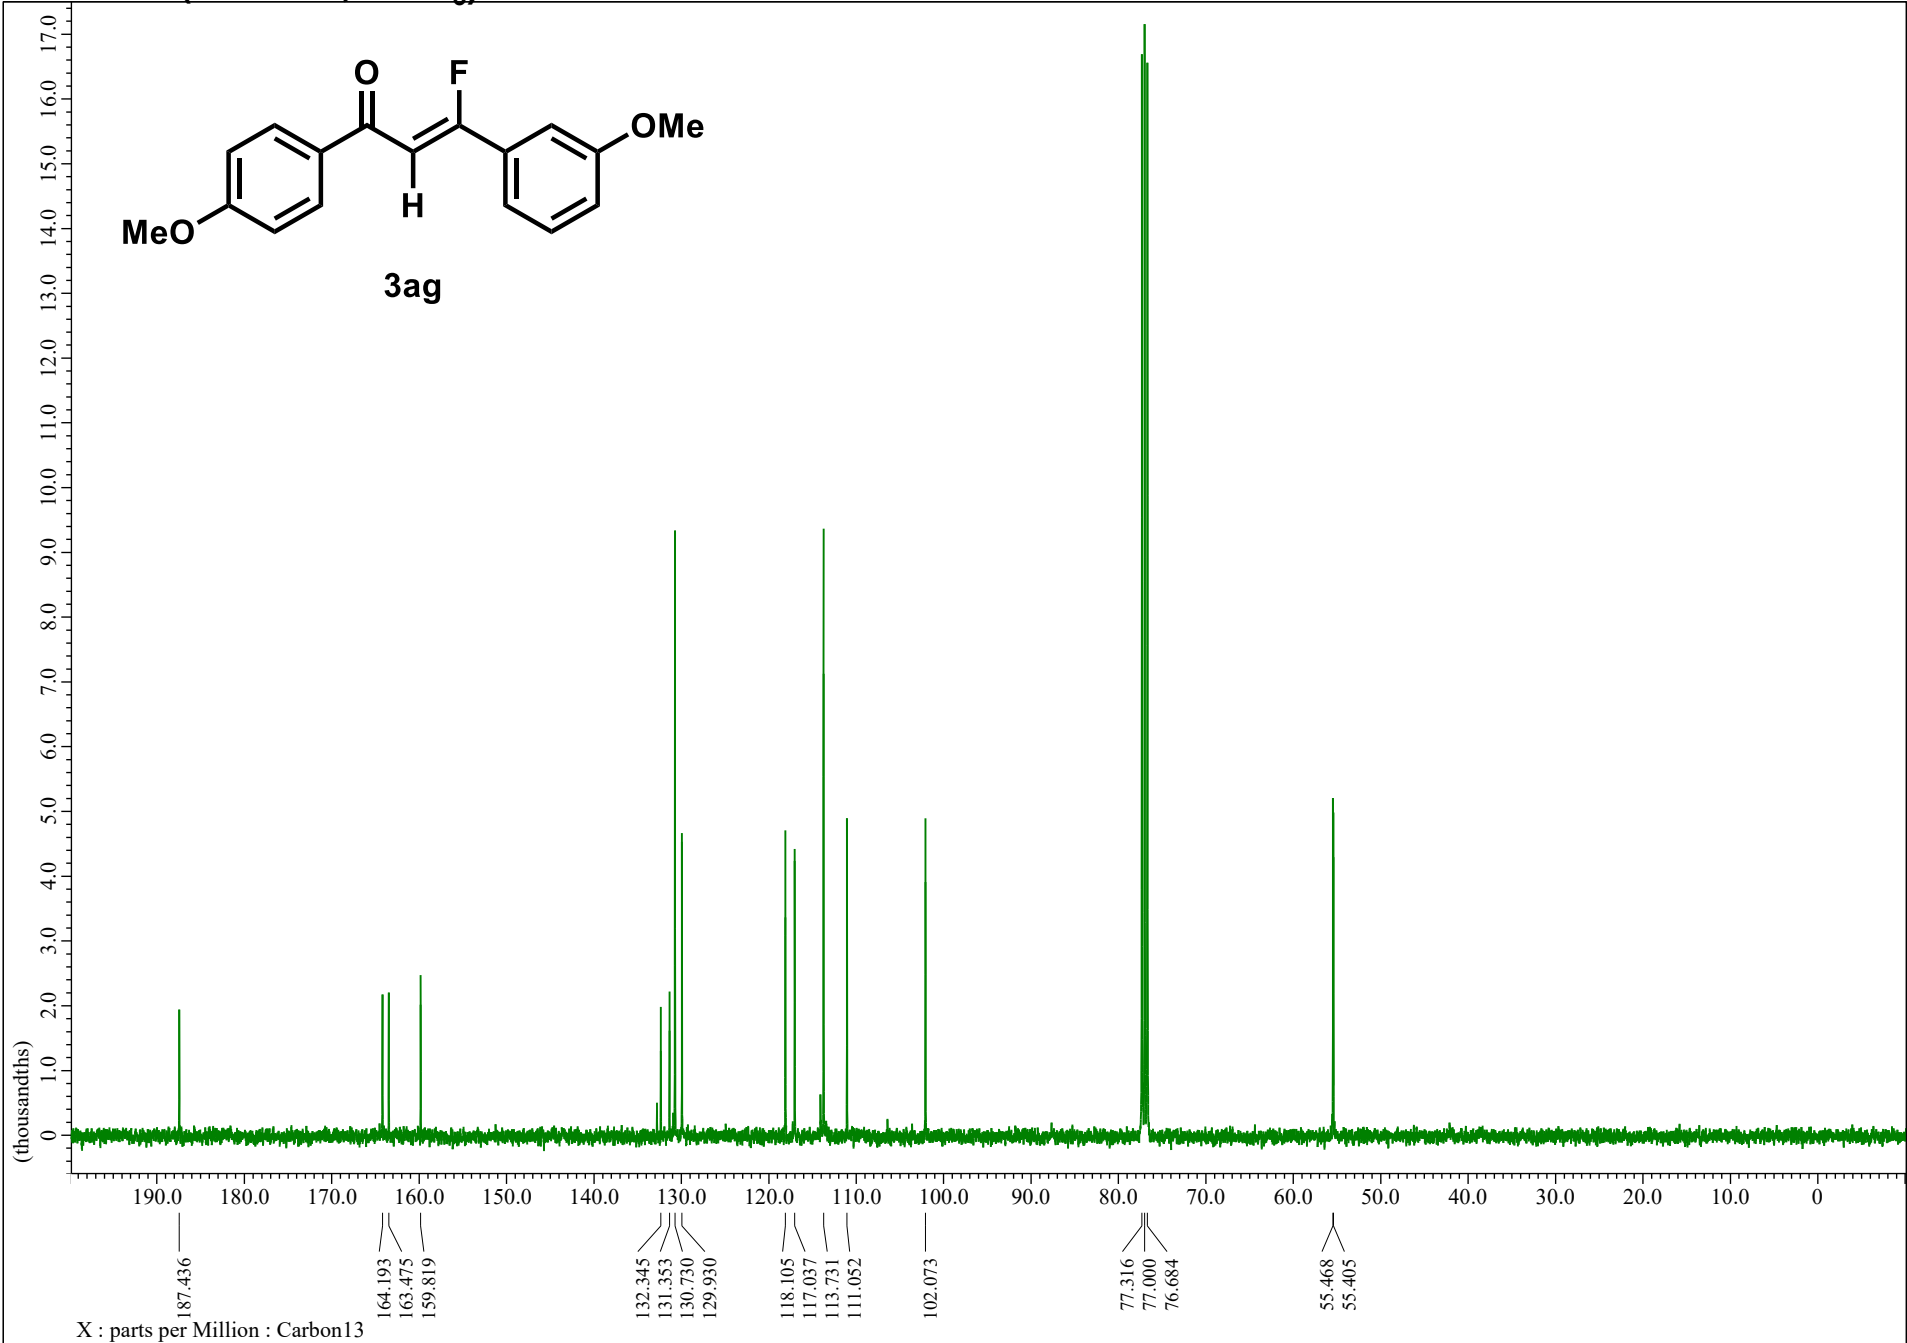

**<sup>19</sup>F NMR (376 MHz, CDCl<sub>3</sub>)**

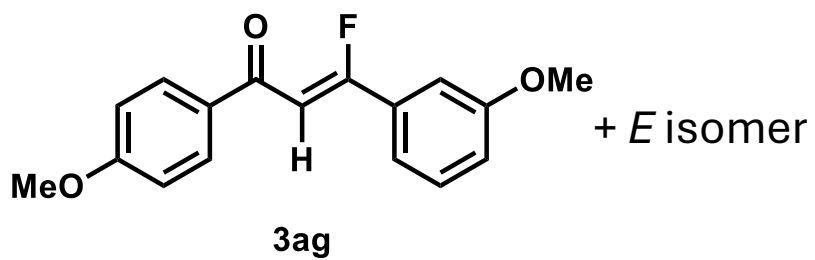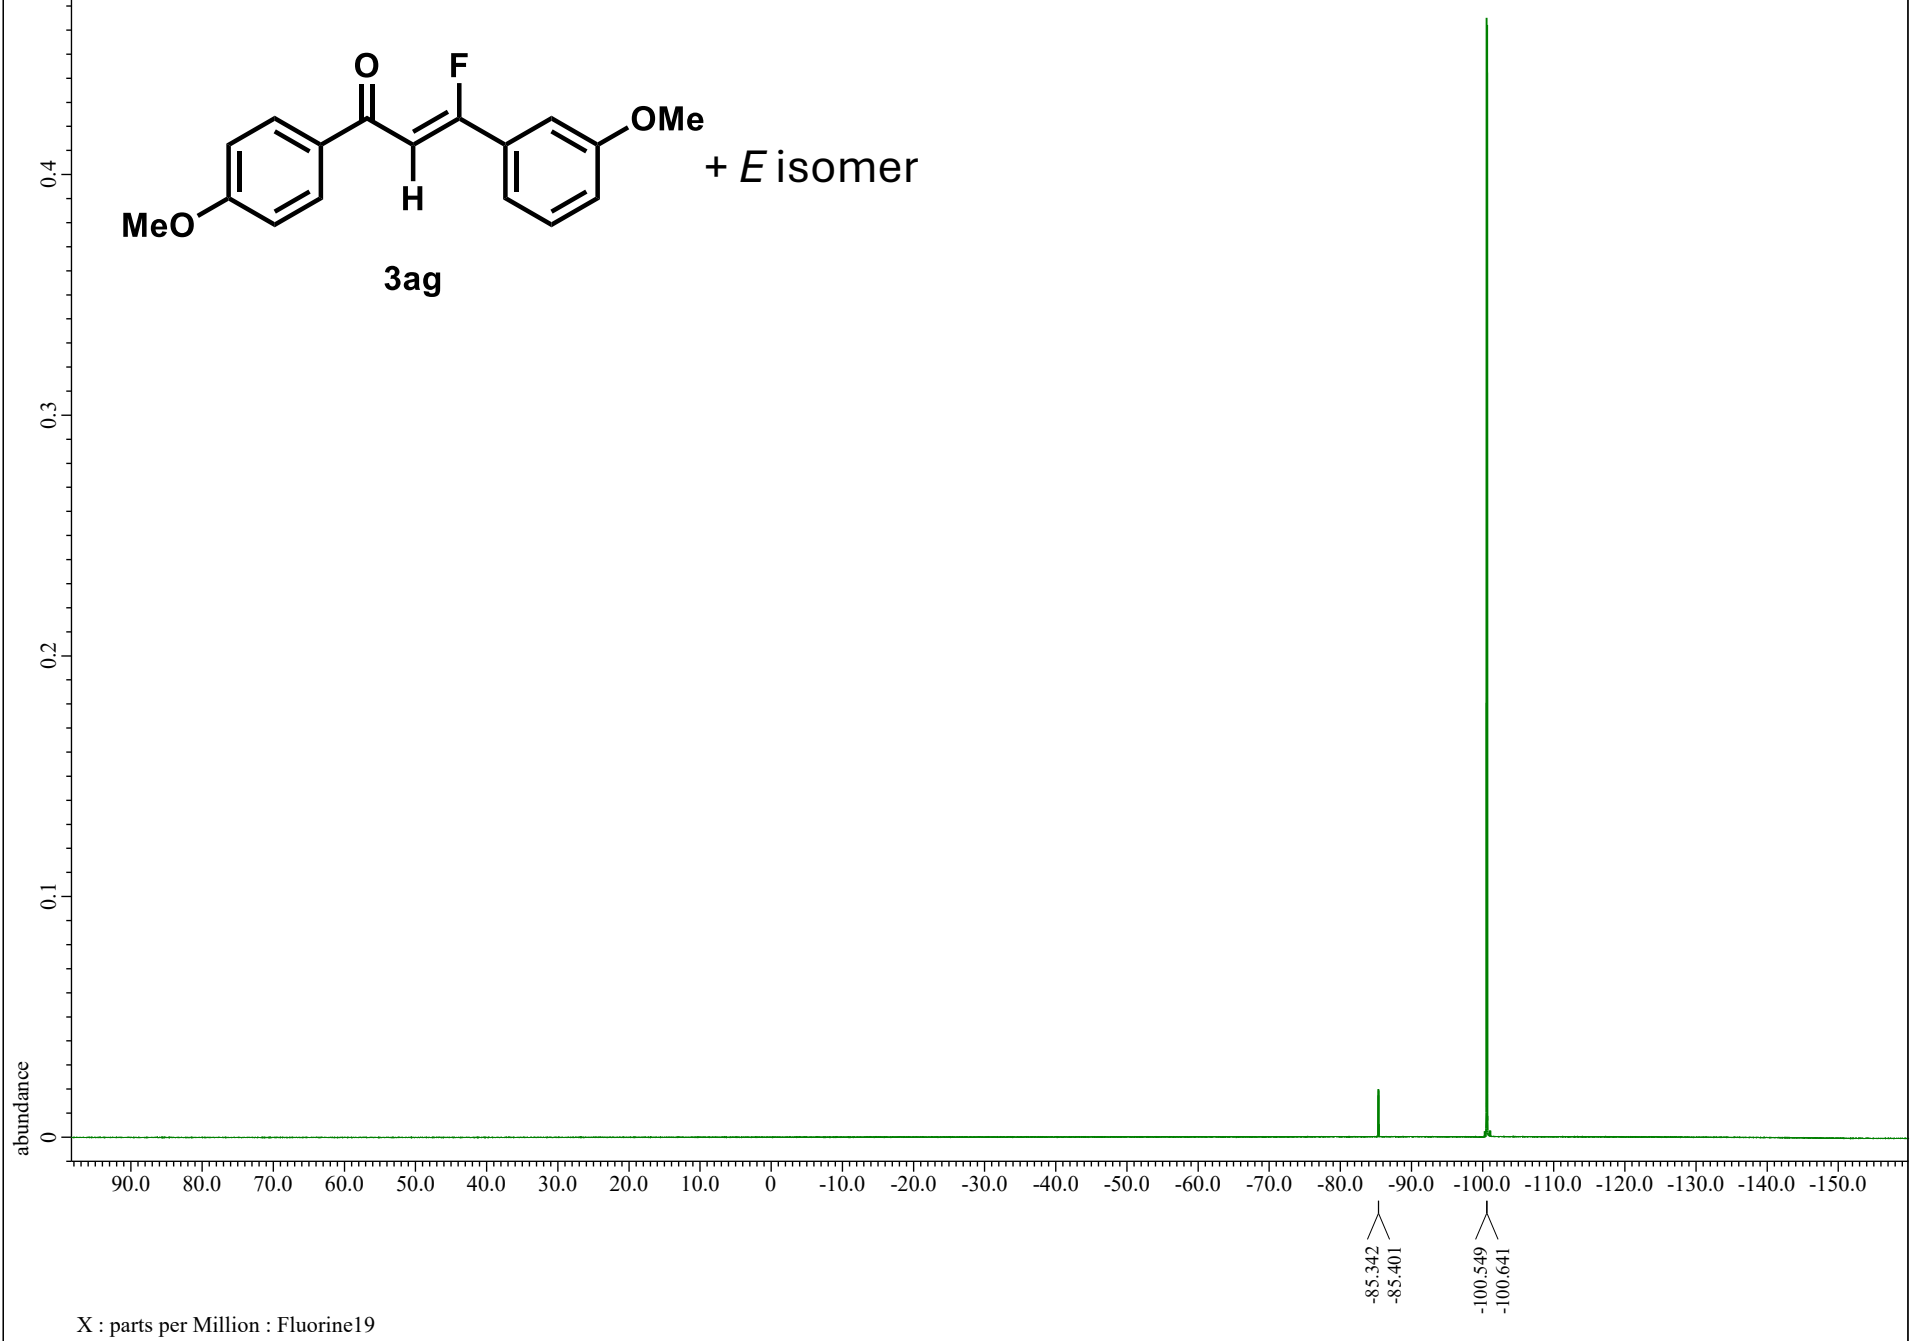

X : parts per Million : Fluorine19

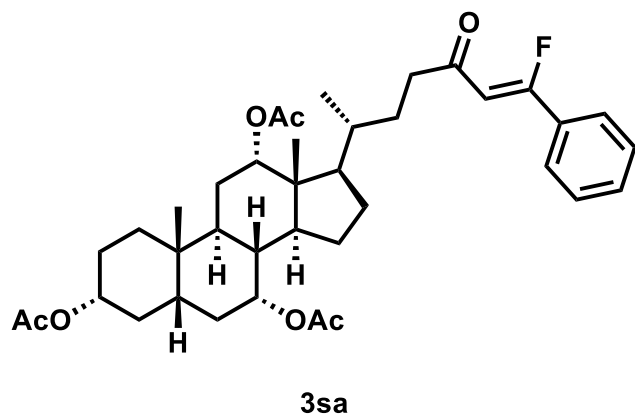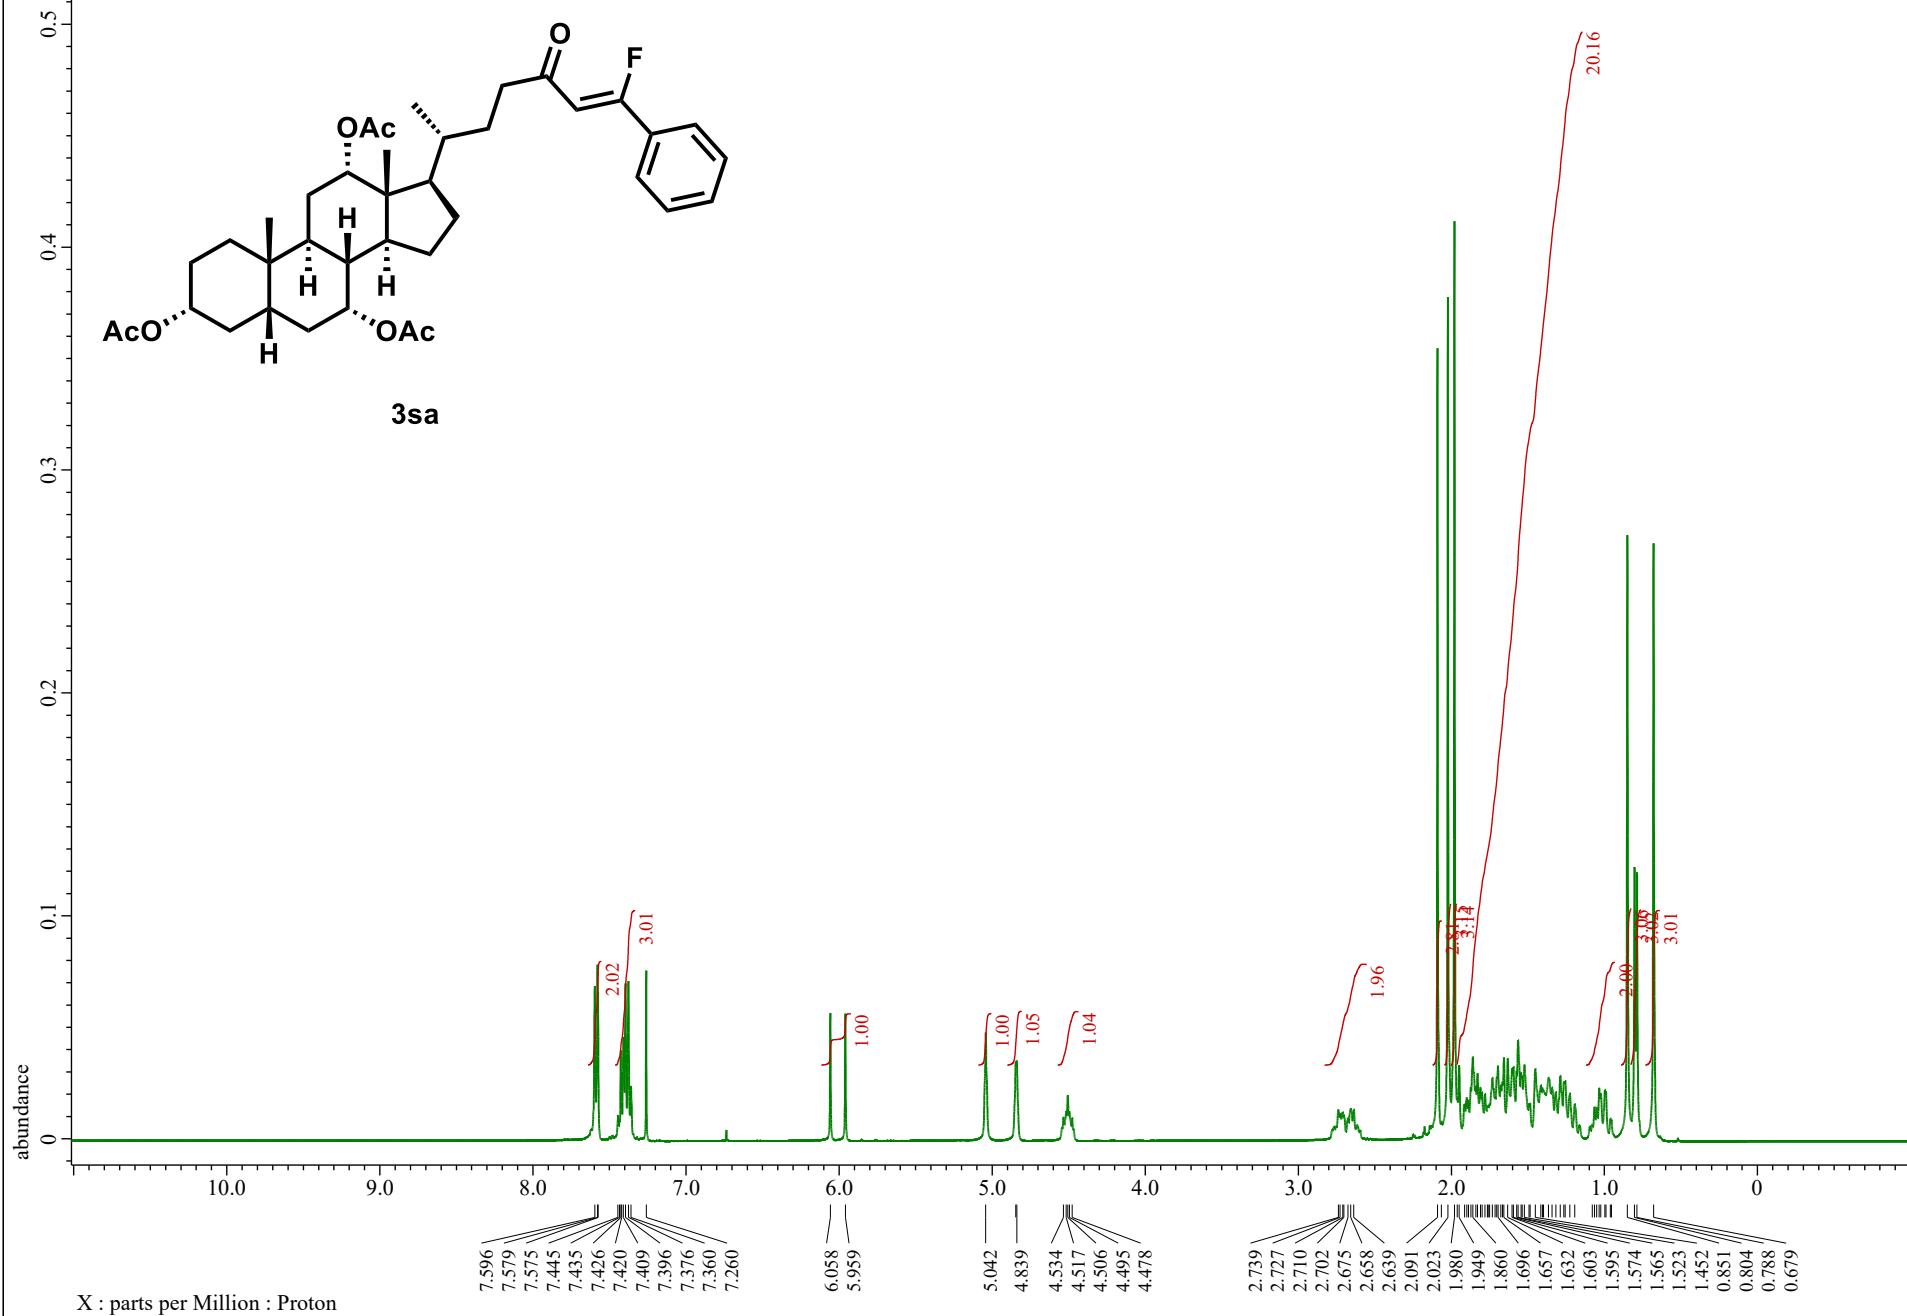



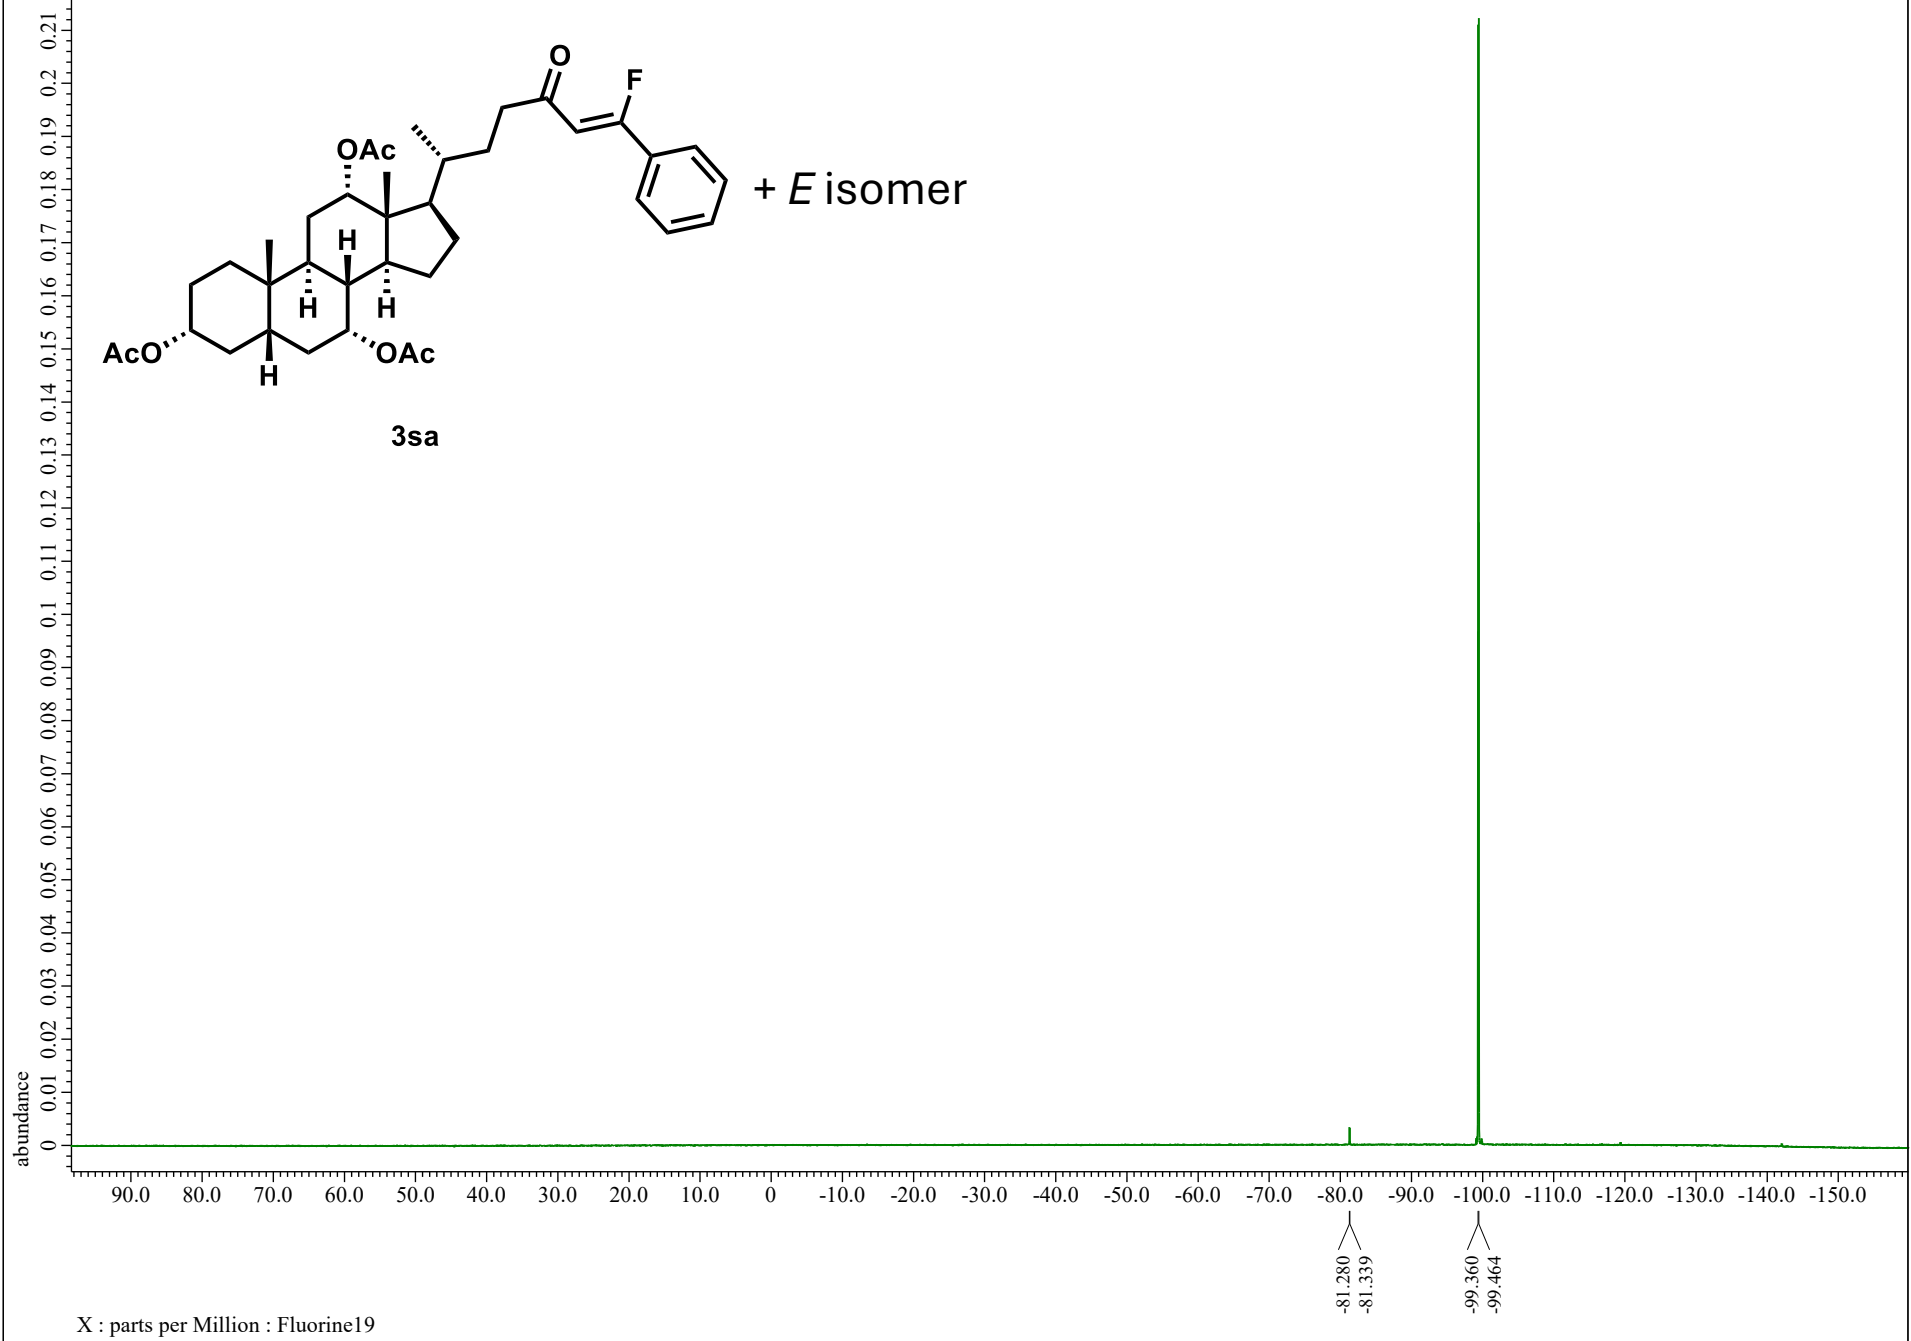

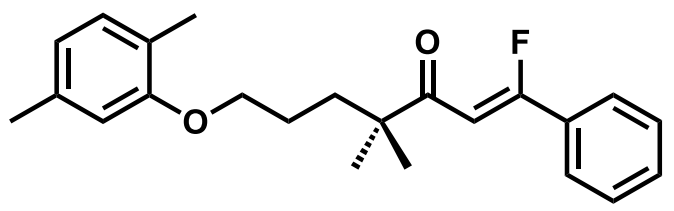

3ta

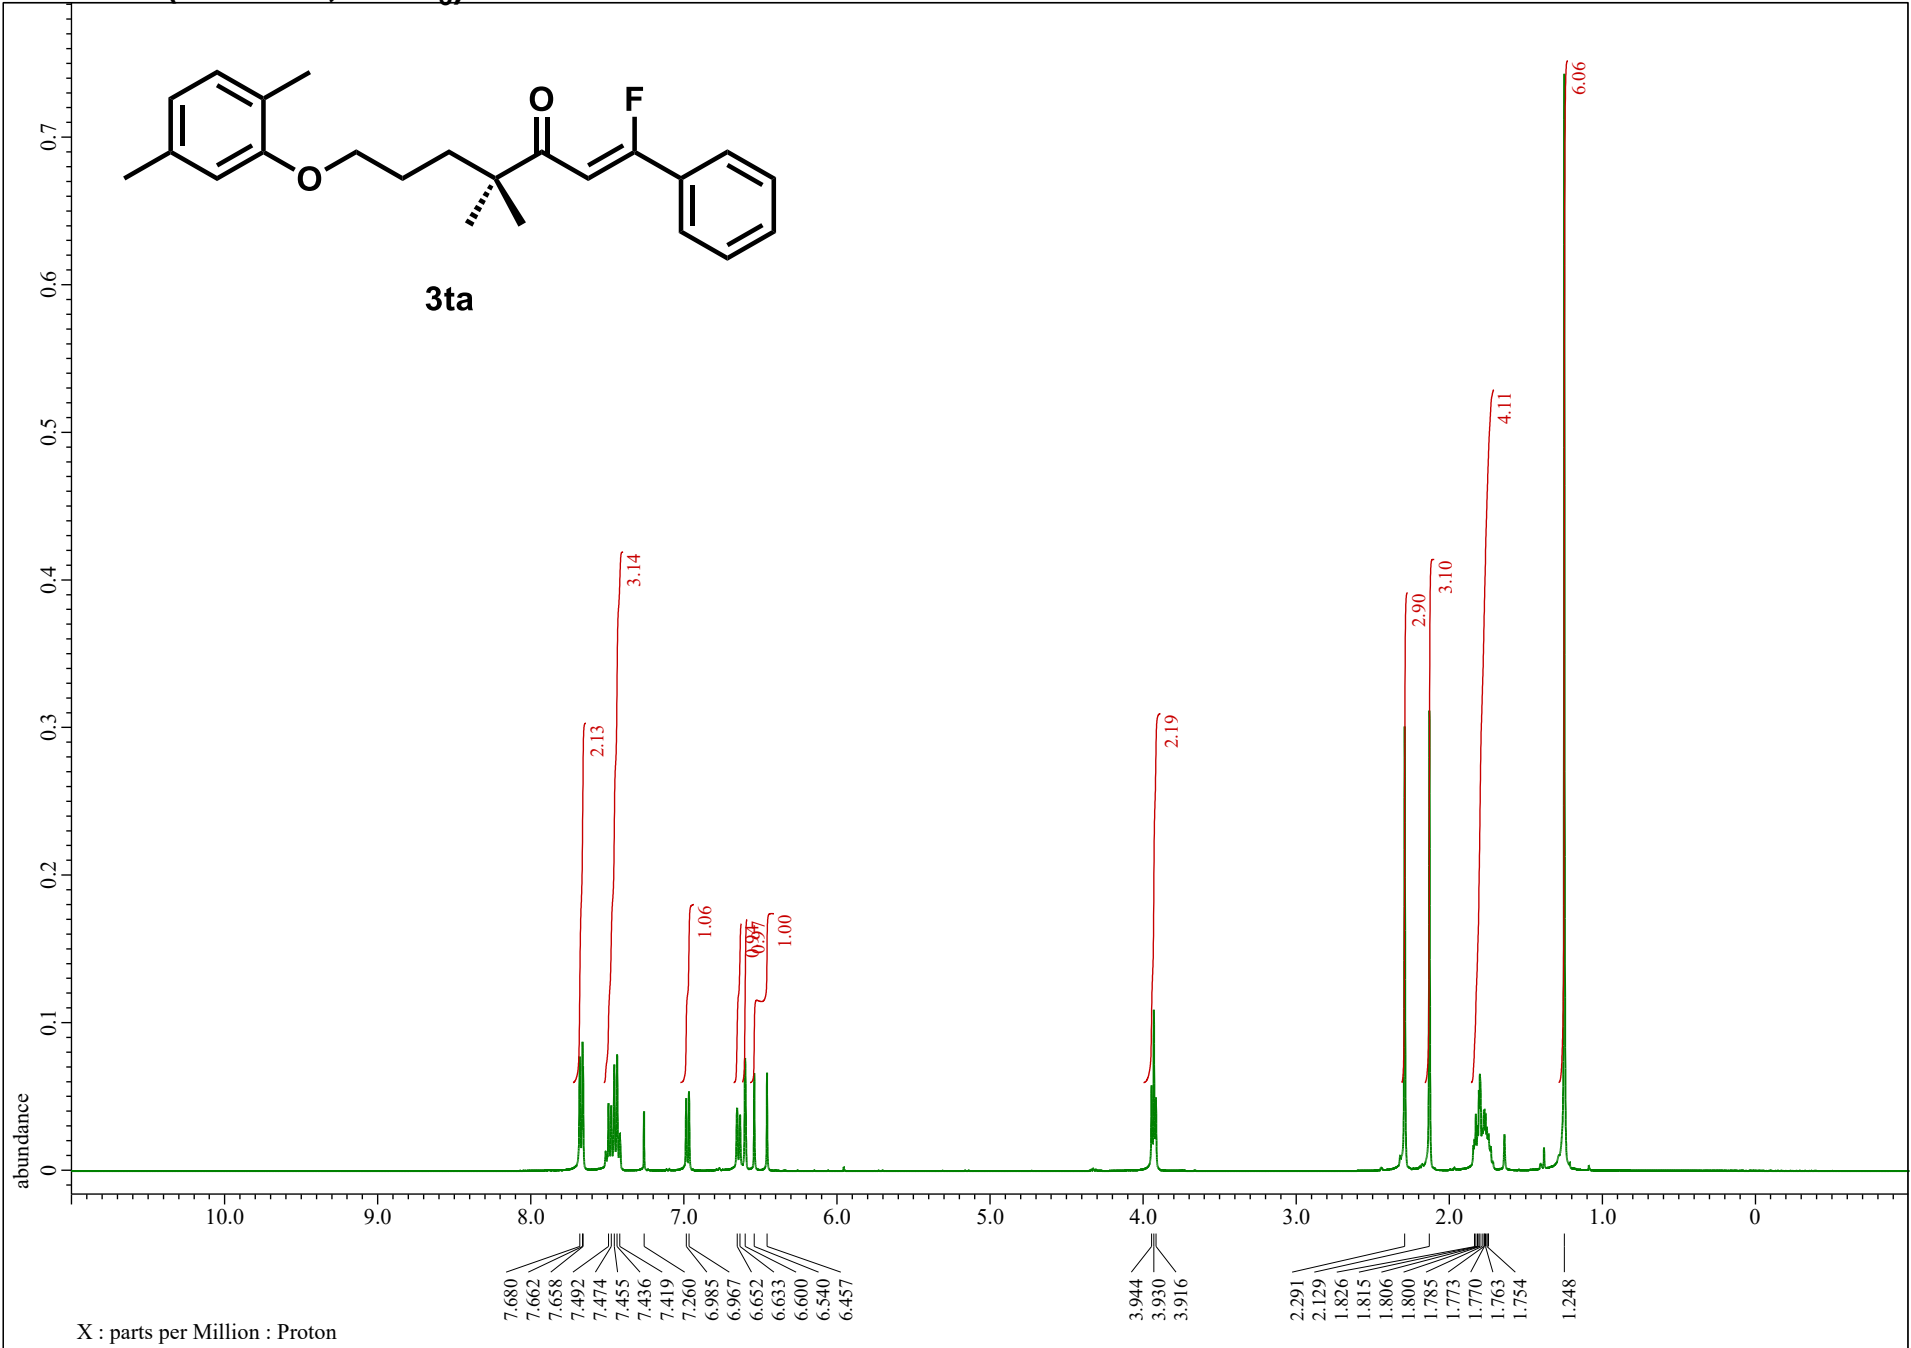

X : parts per Million : Proton

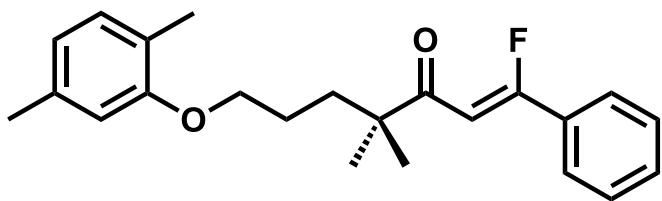

**3ta**

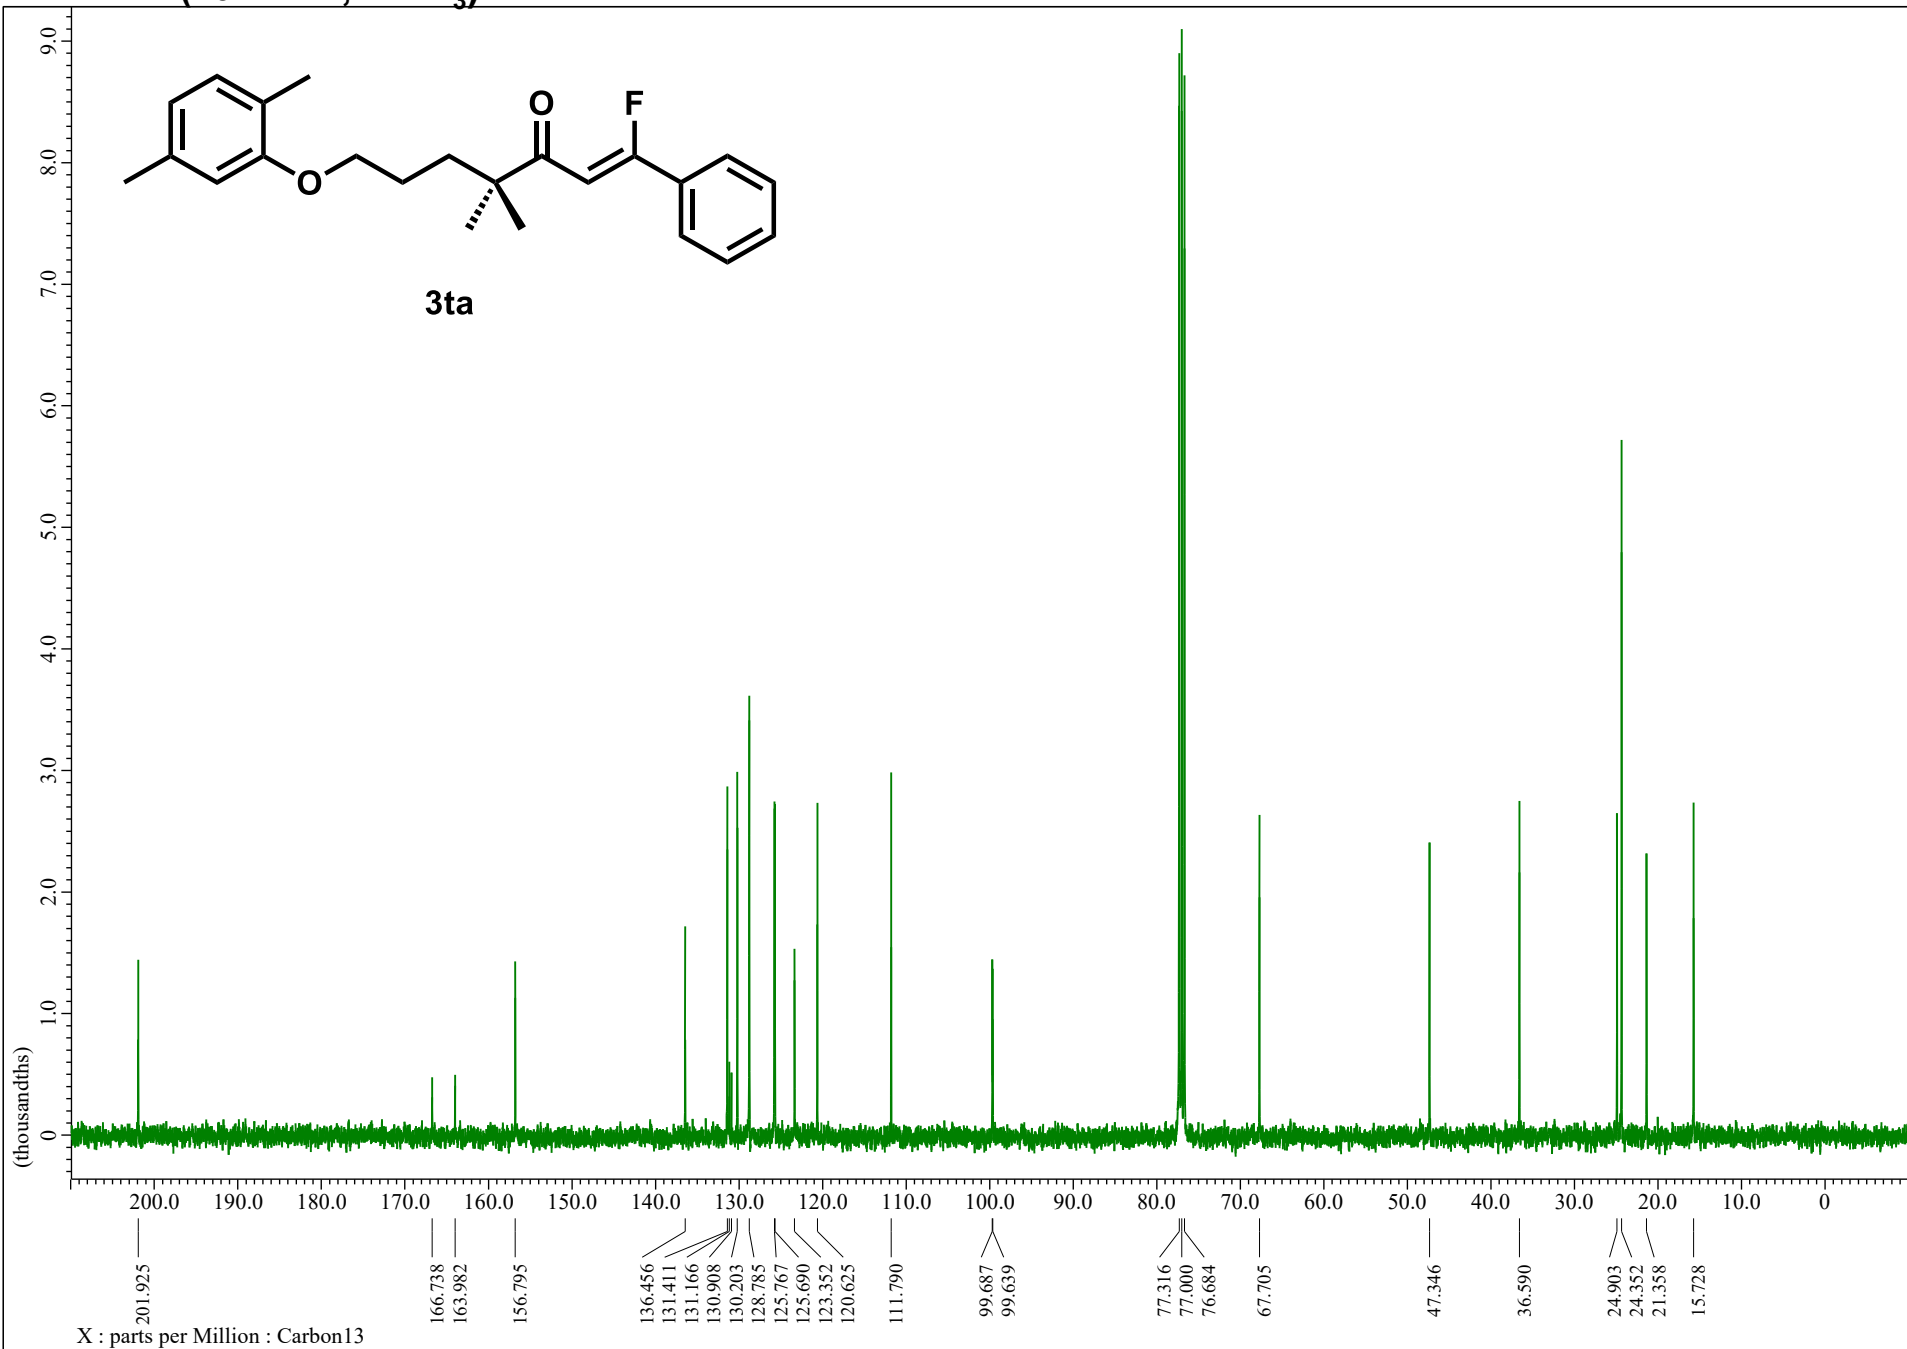



**3ta**

+ *E* isomer

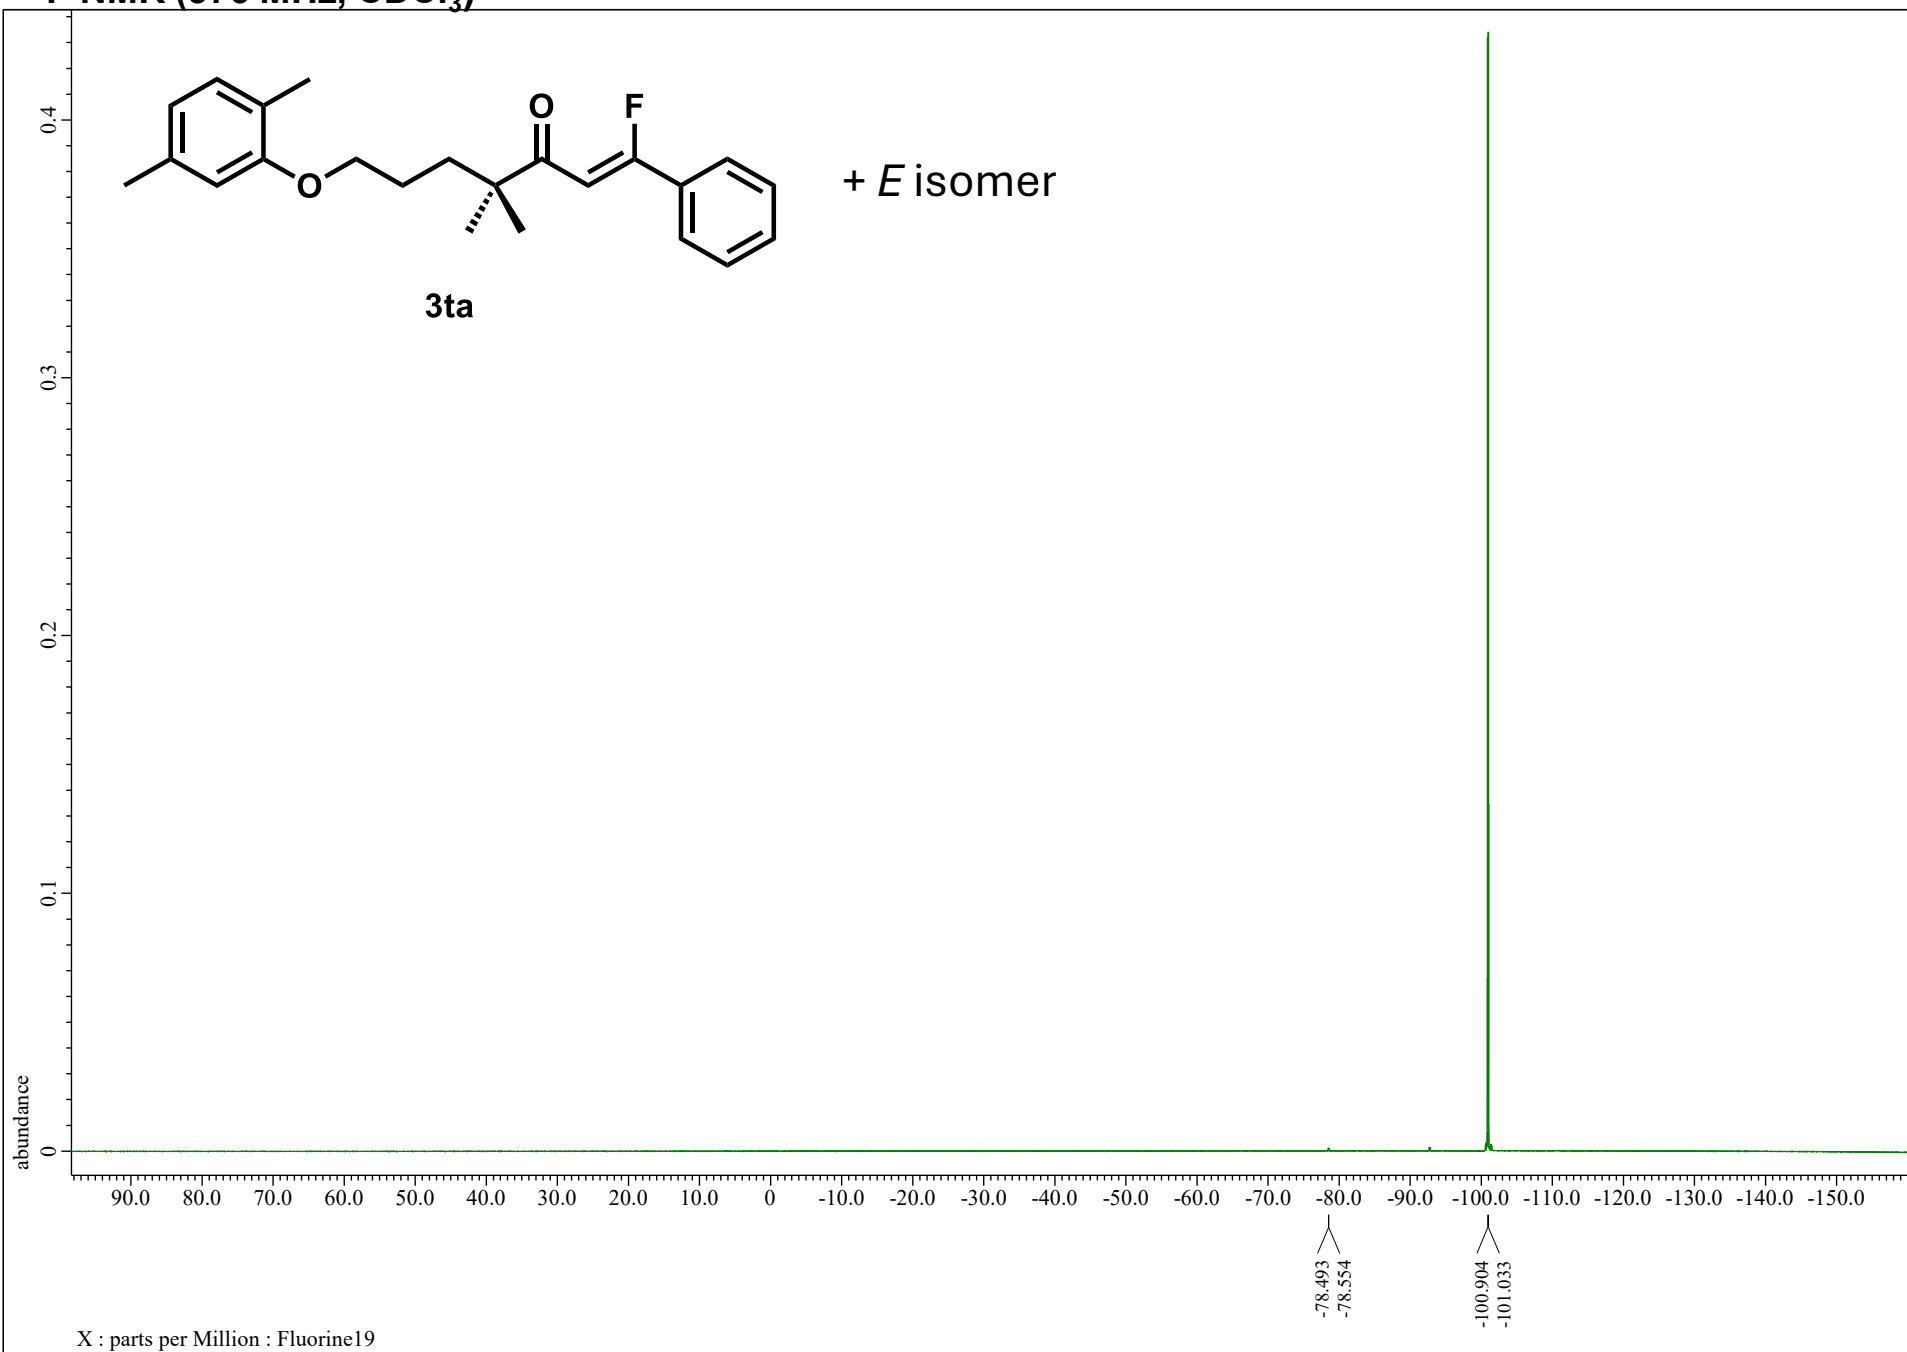

X : parts per Million : Fluorine19

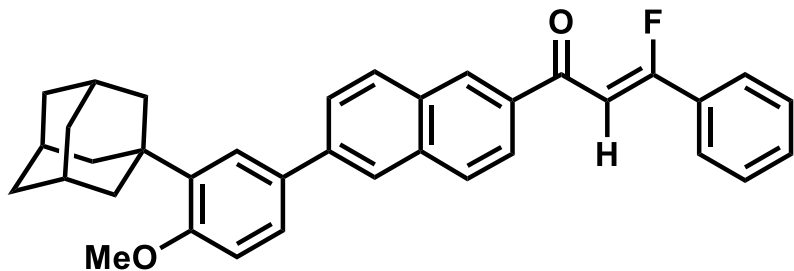

3ua

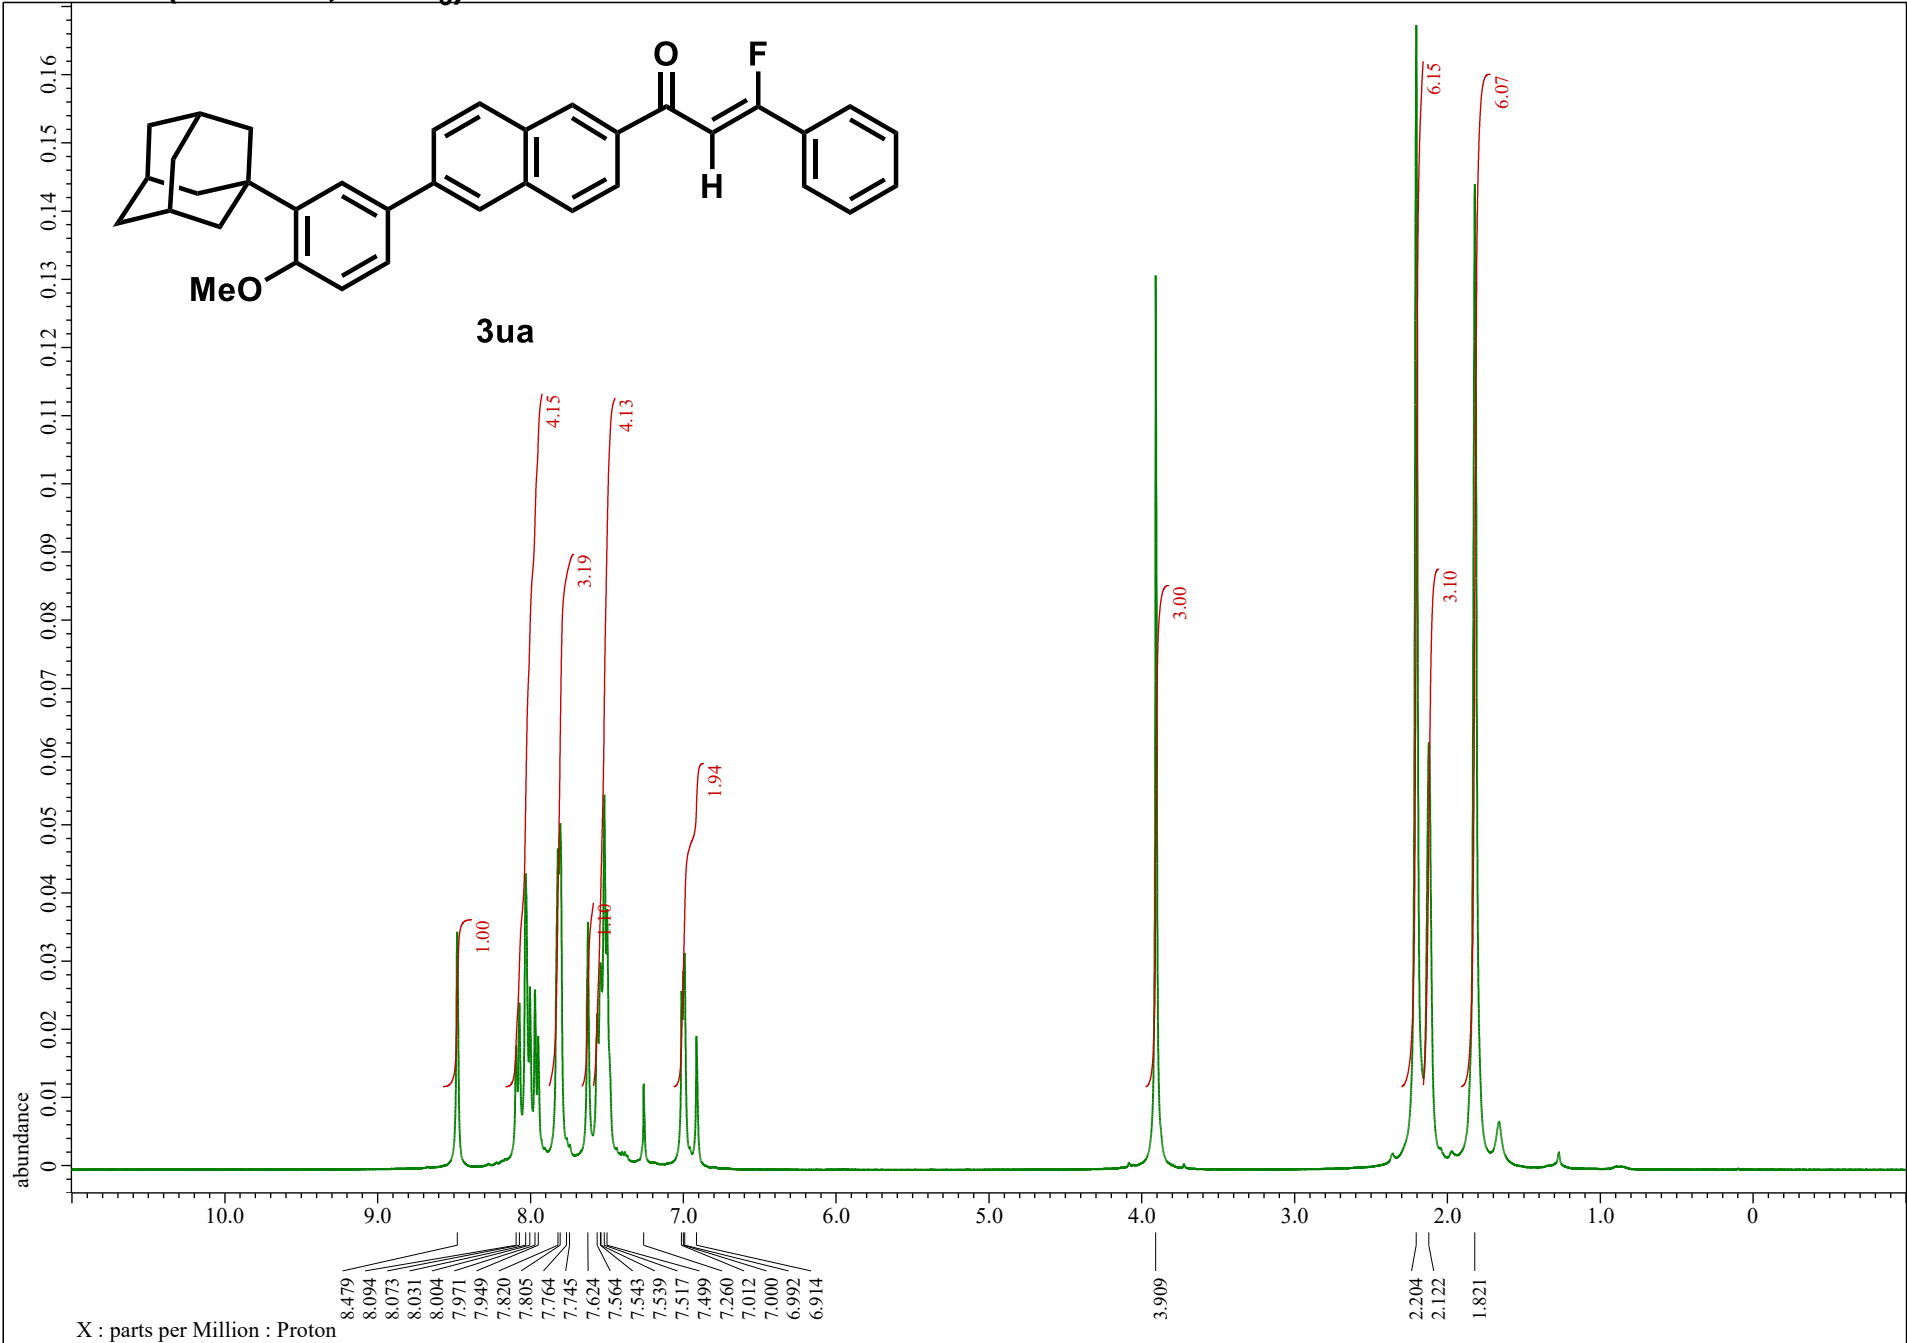



3ua

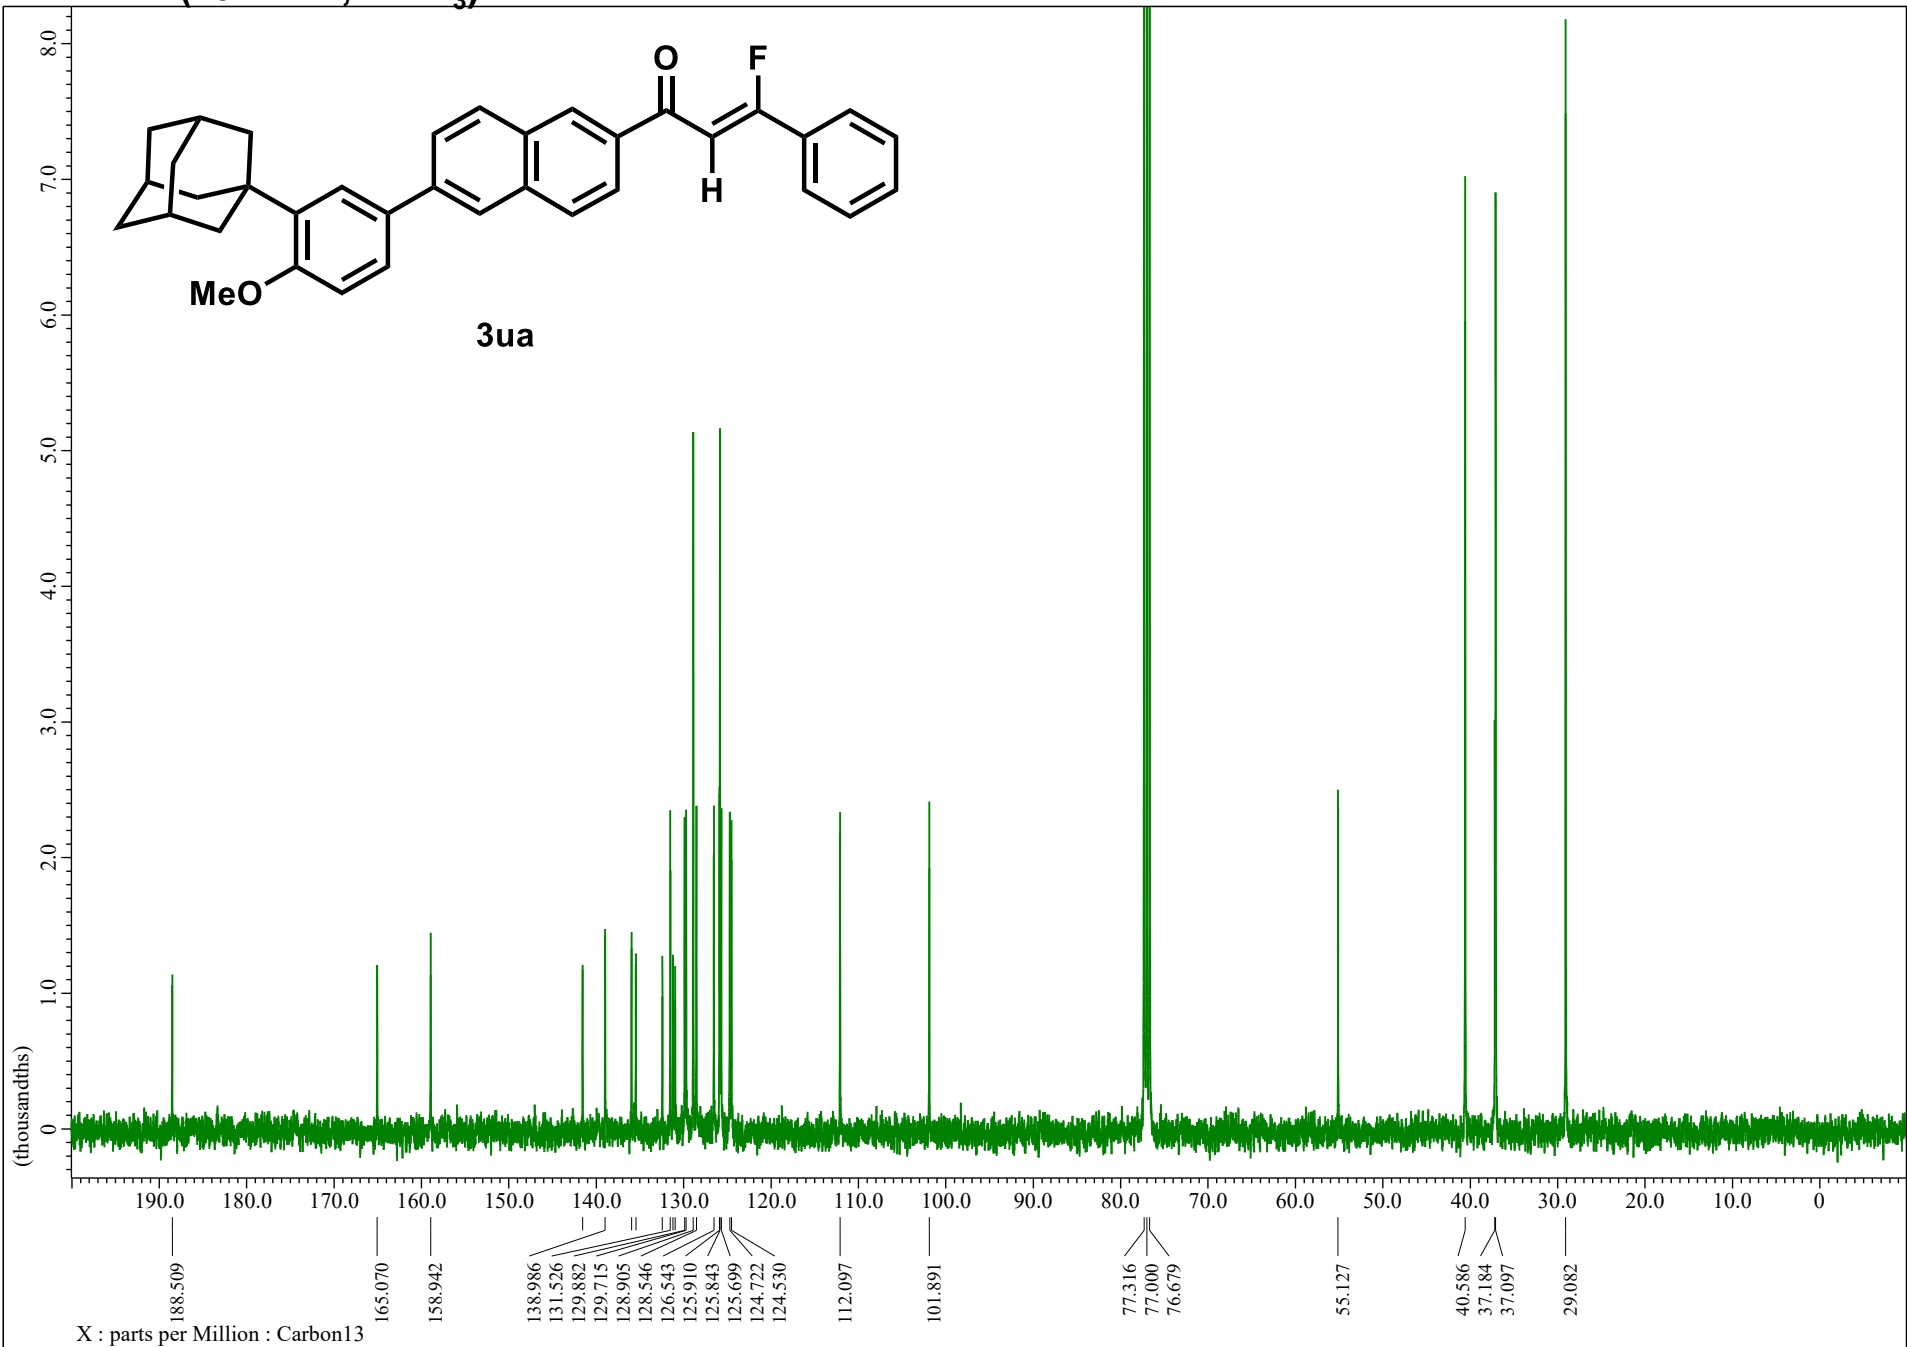

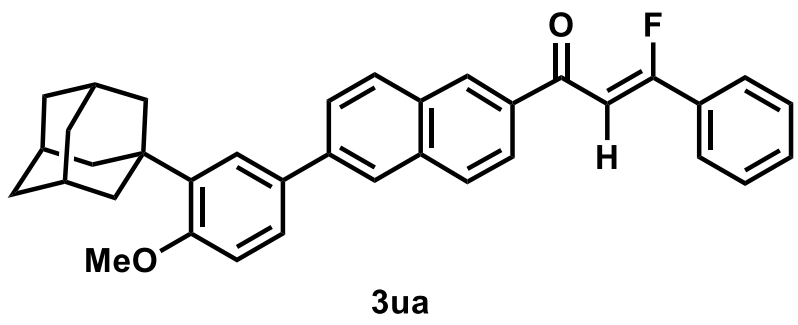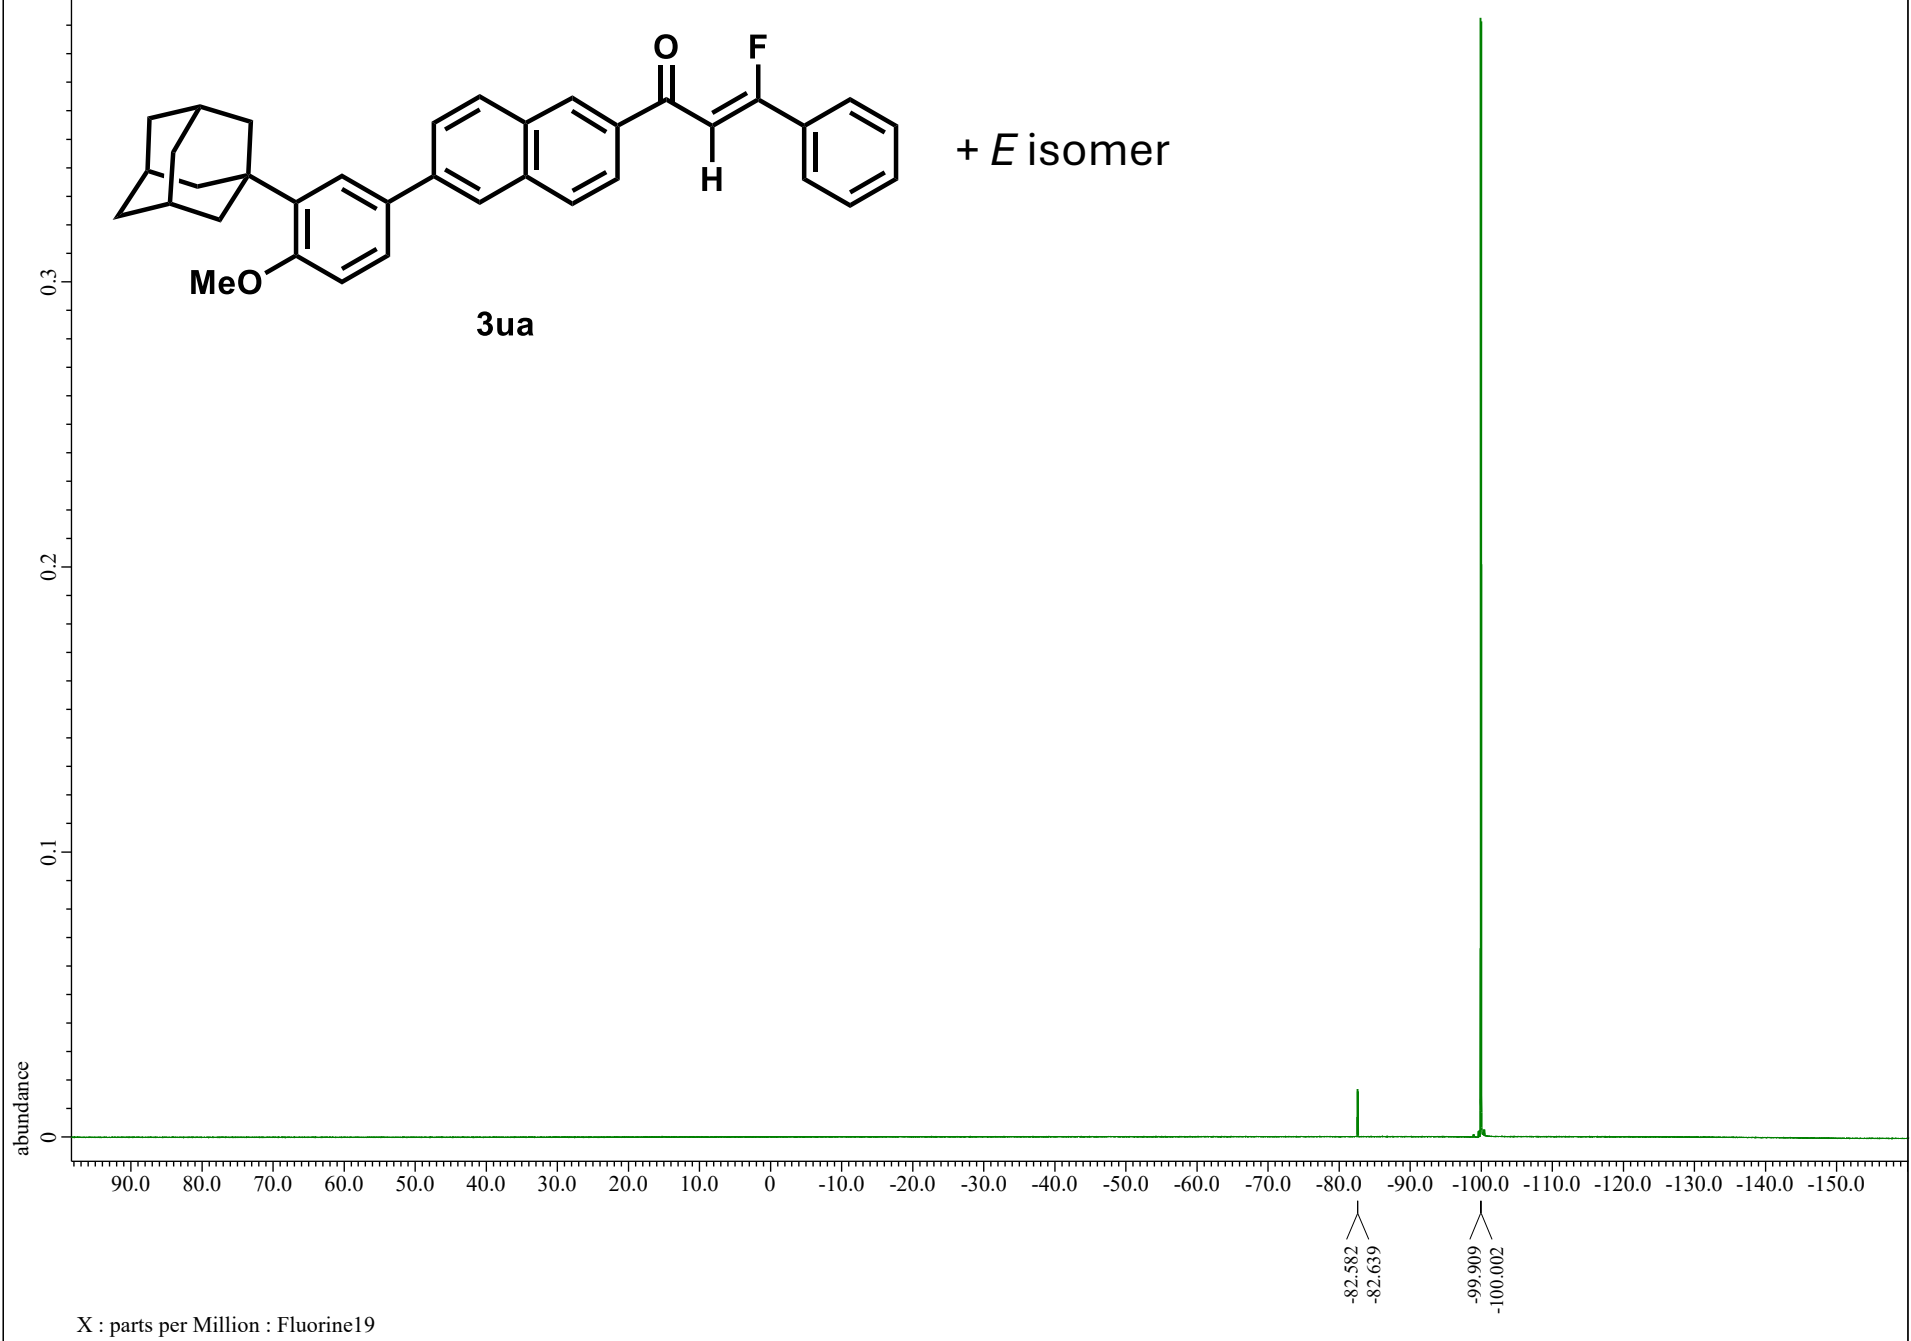

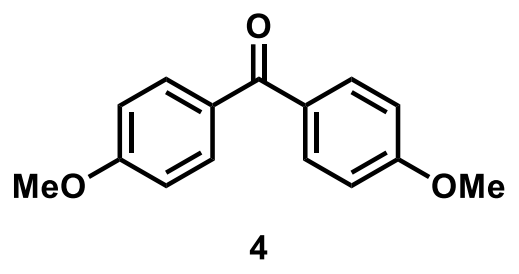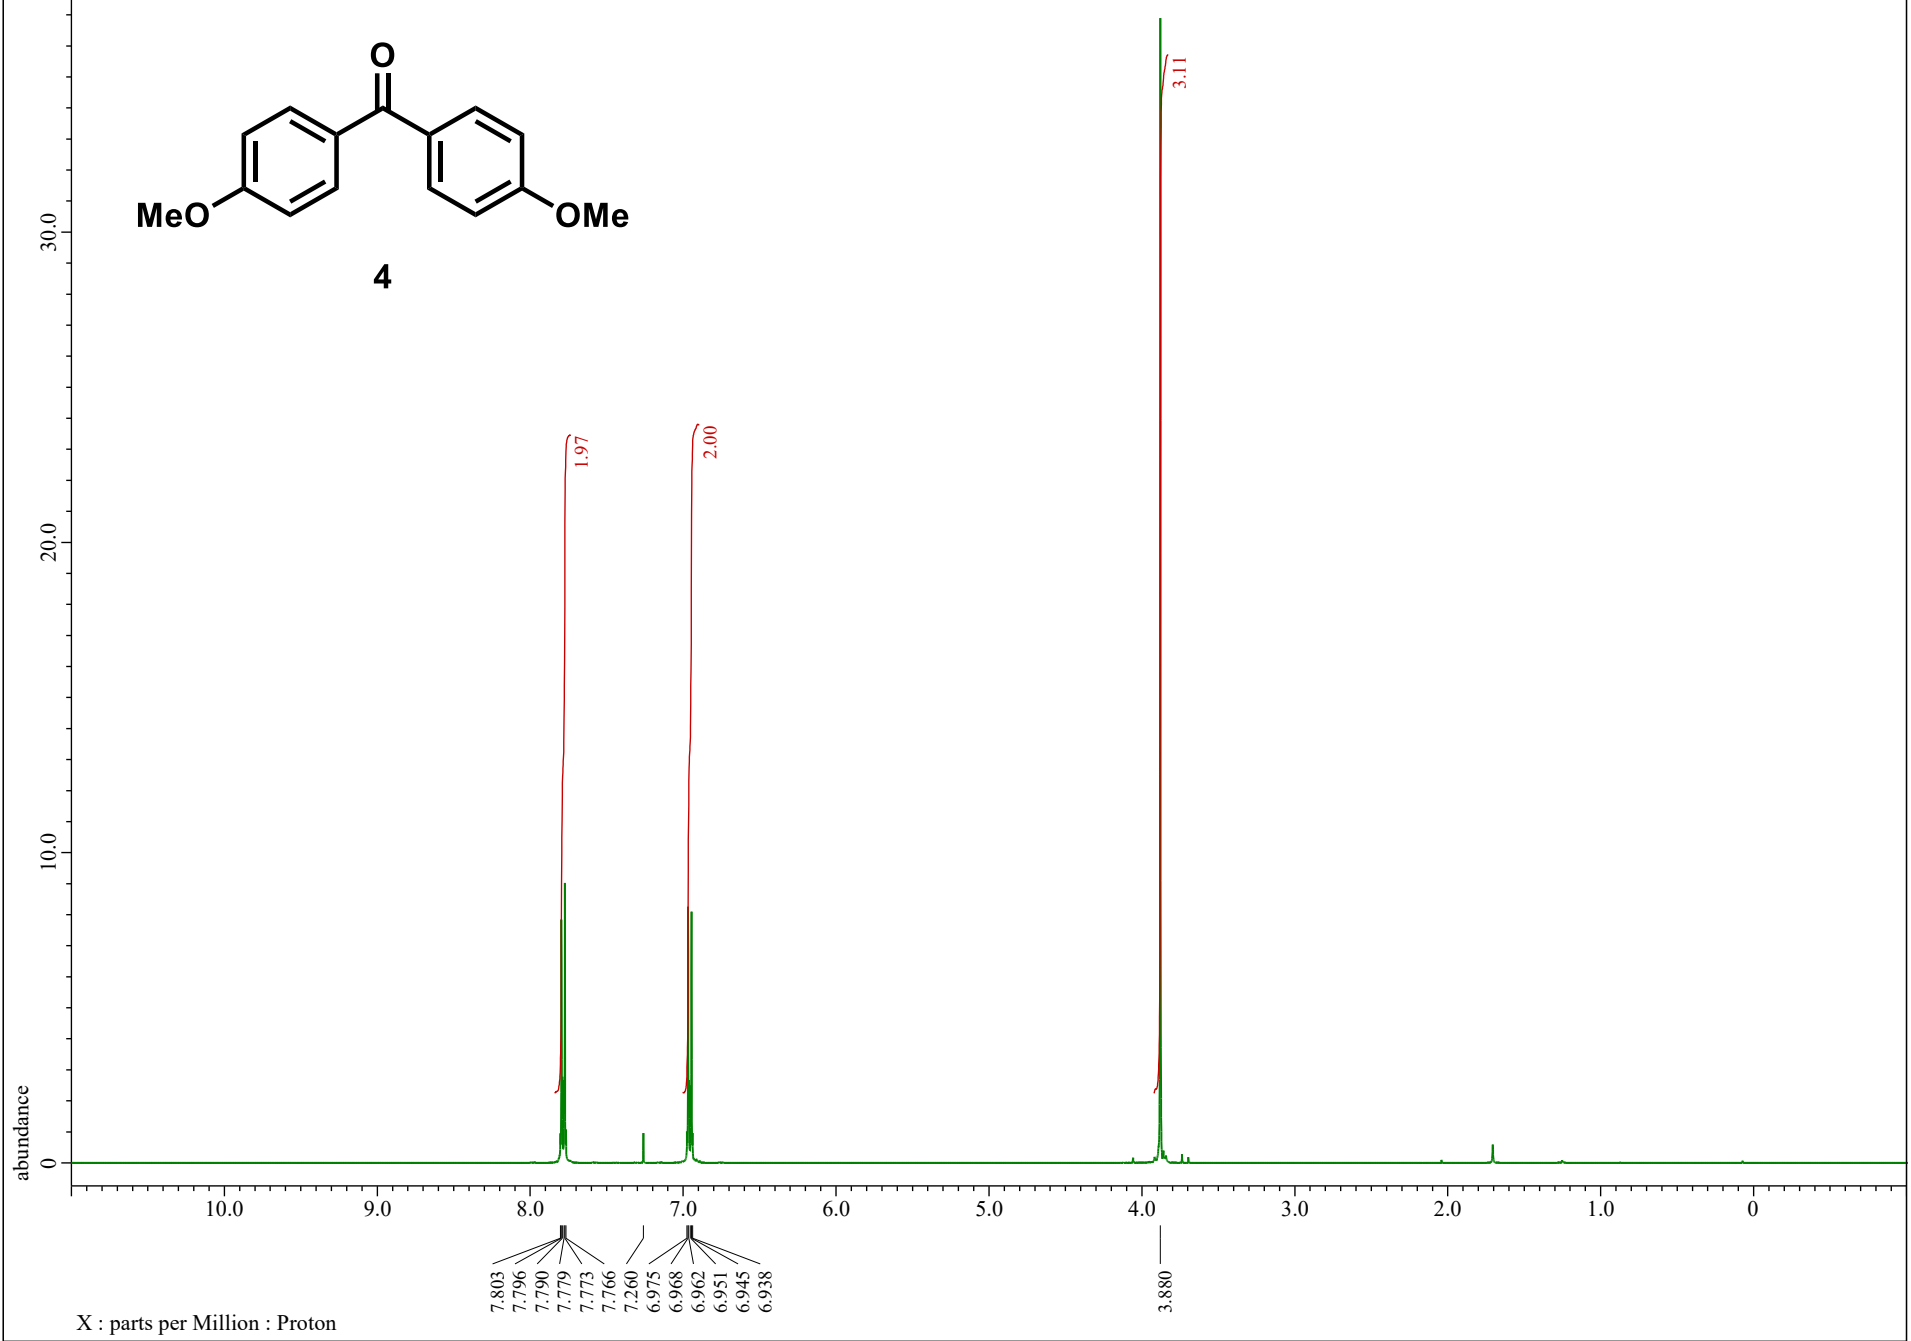

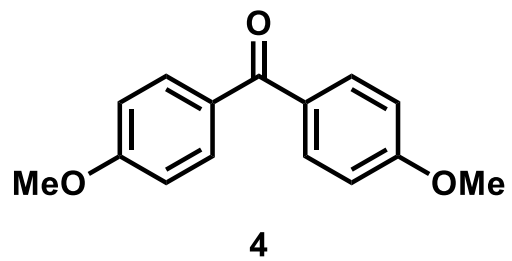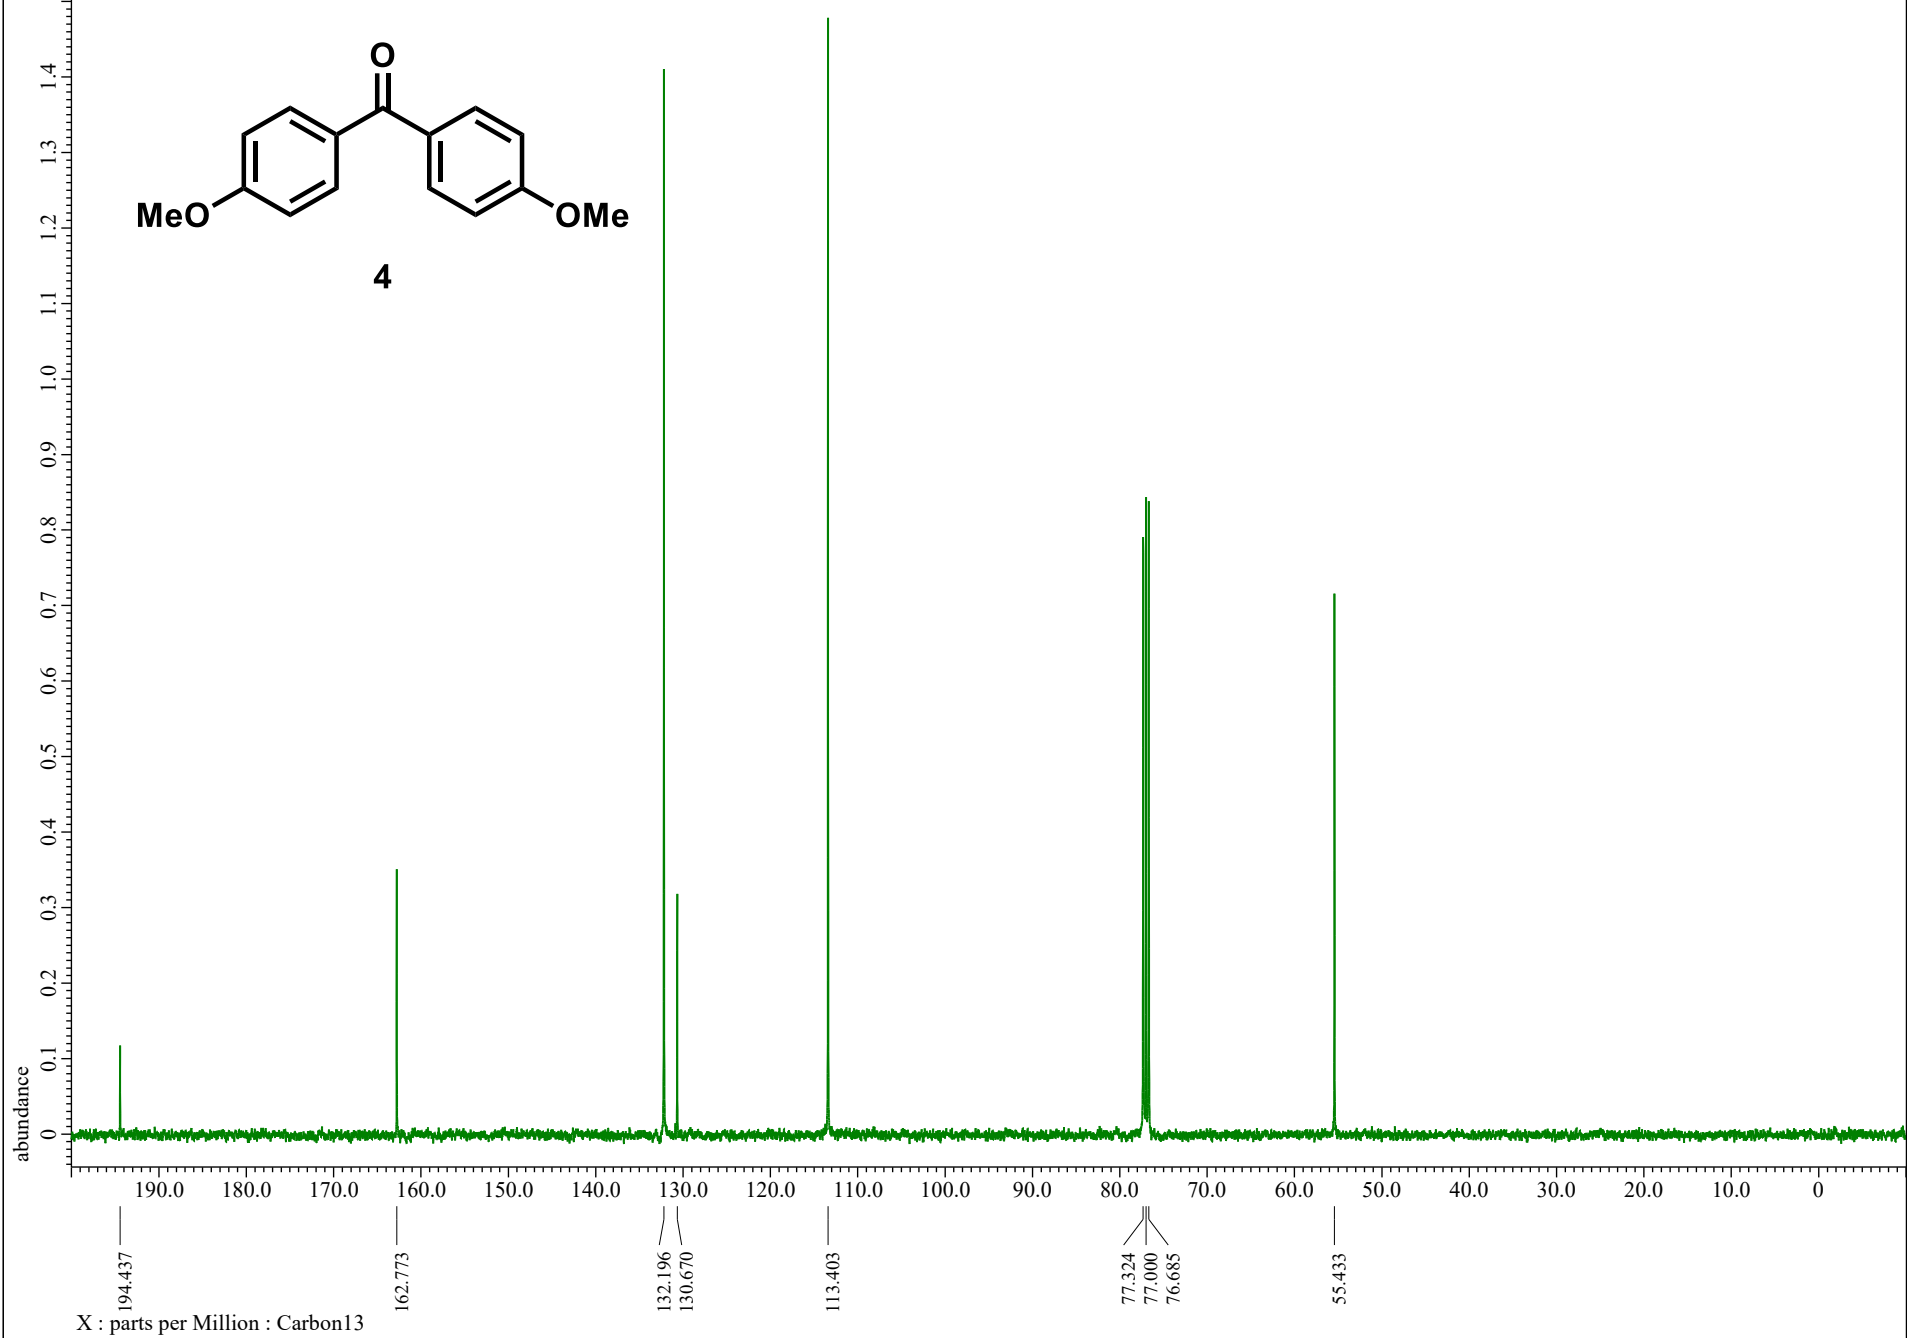

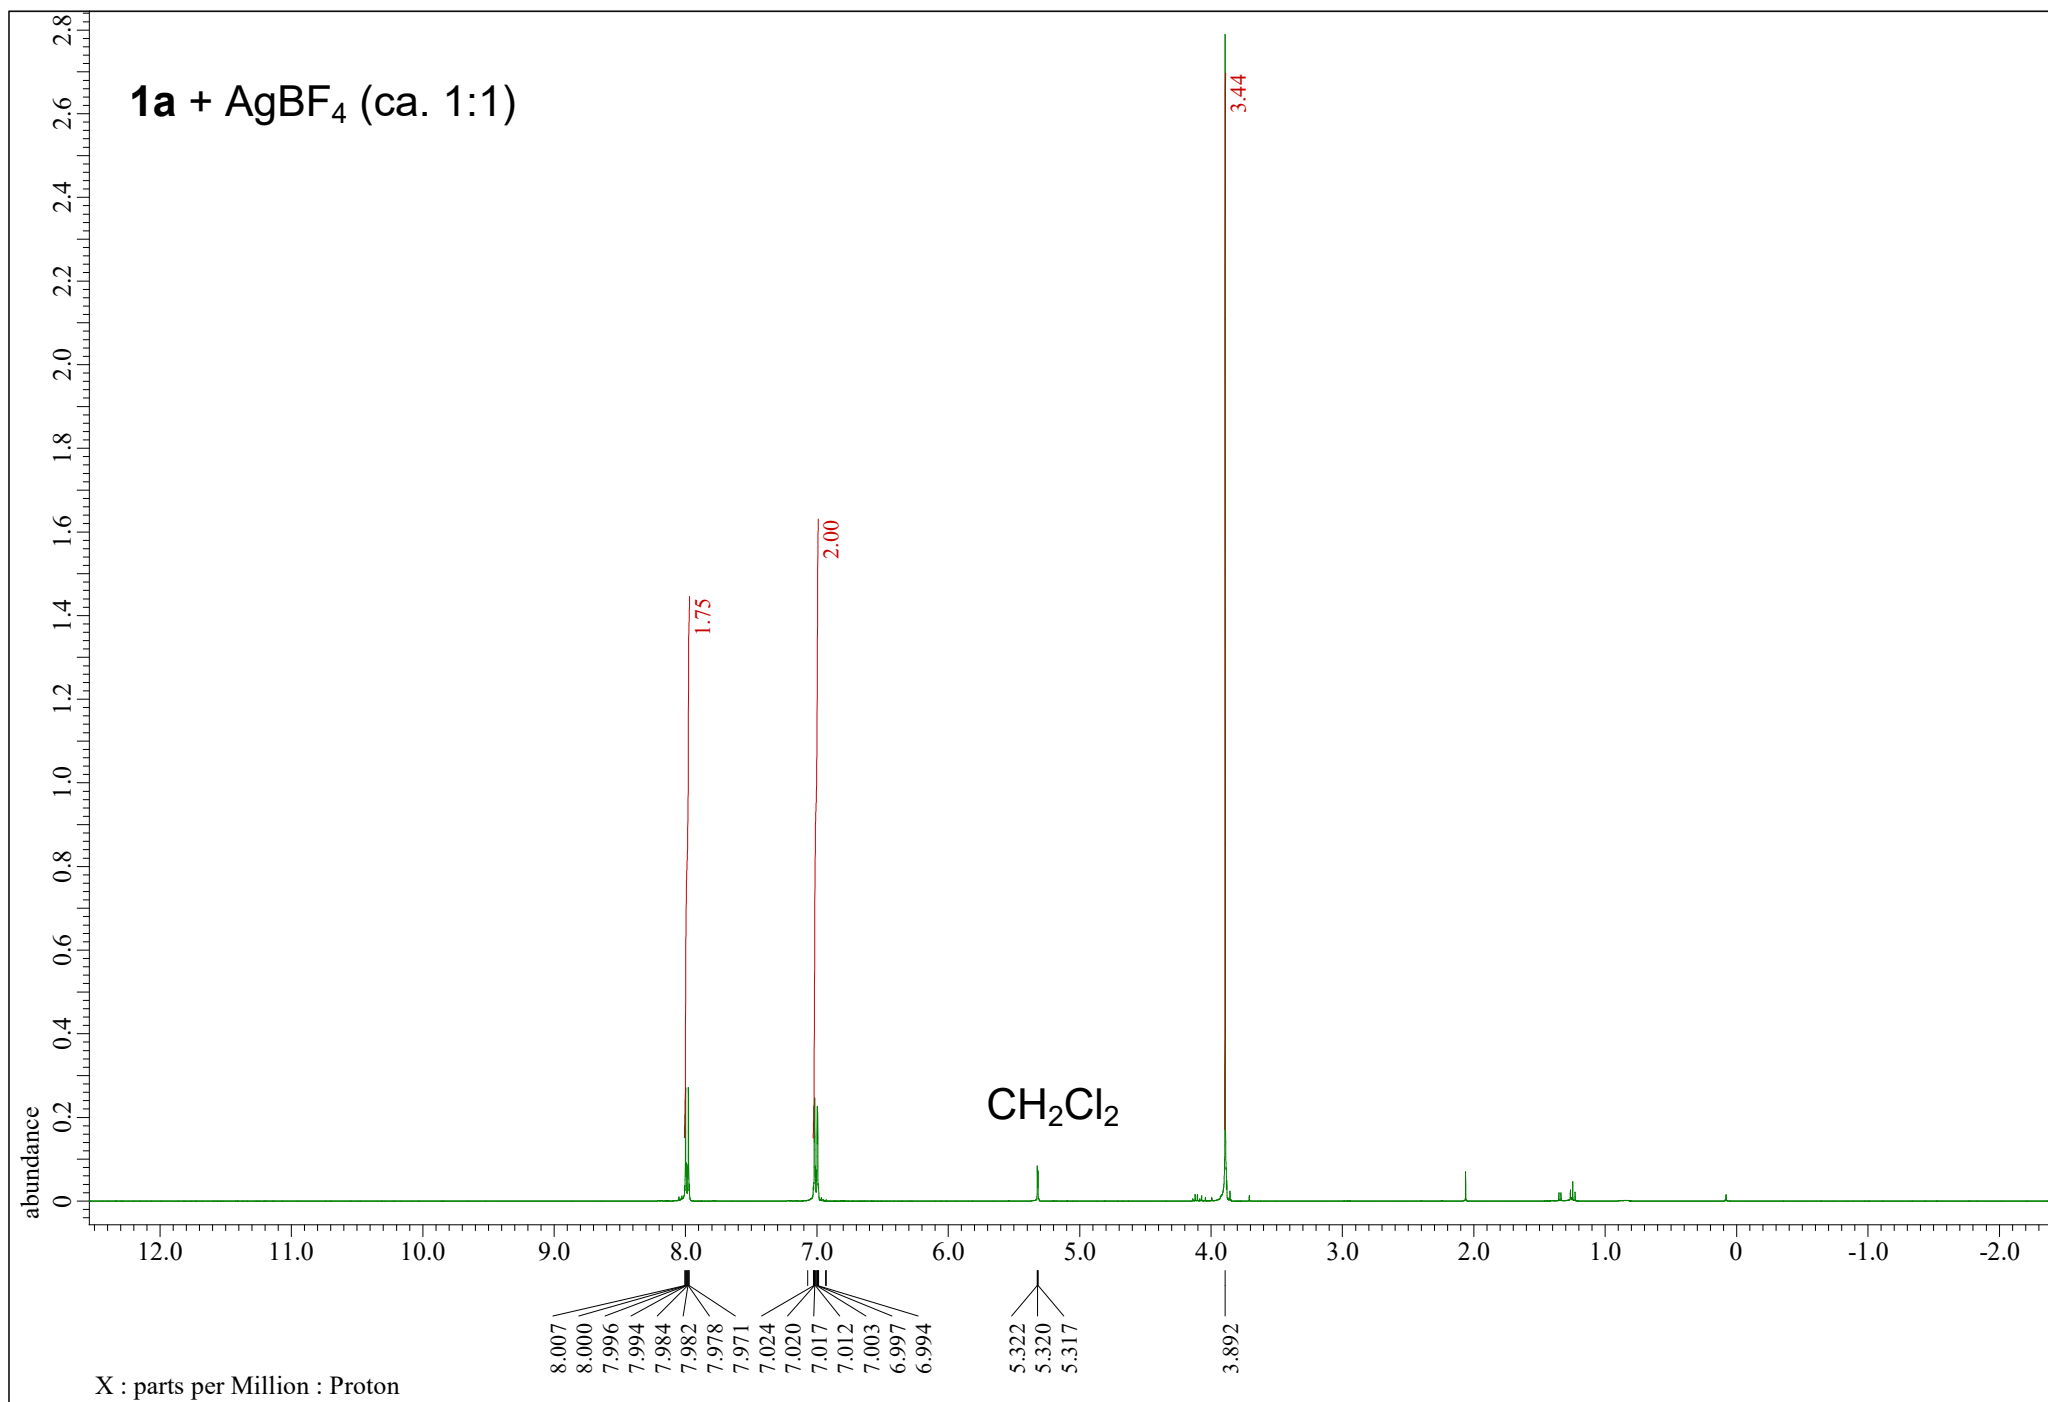

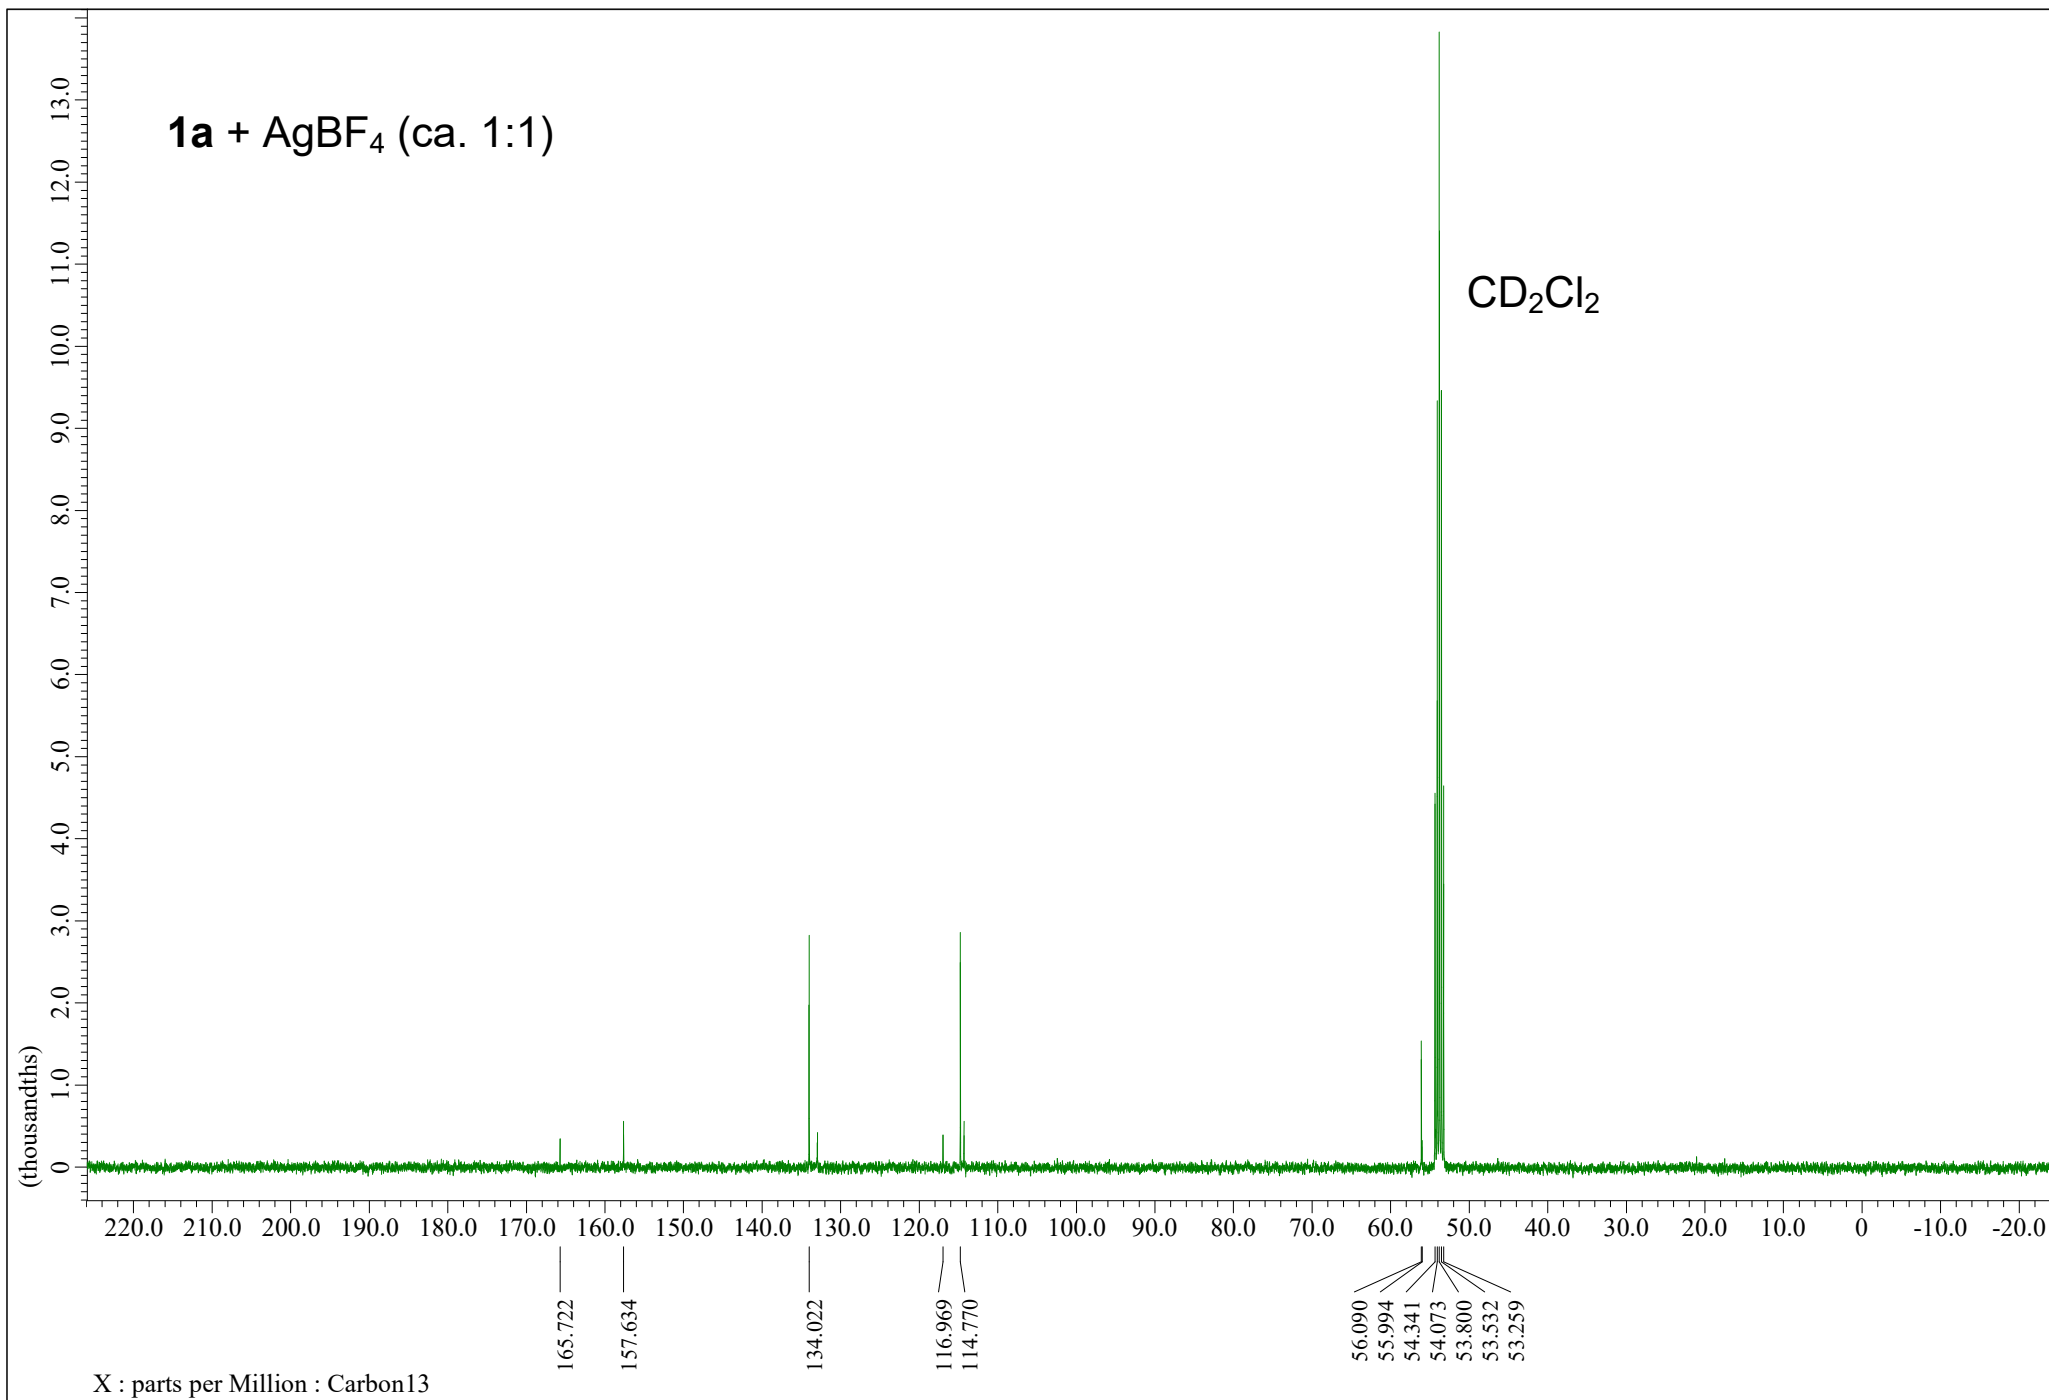

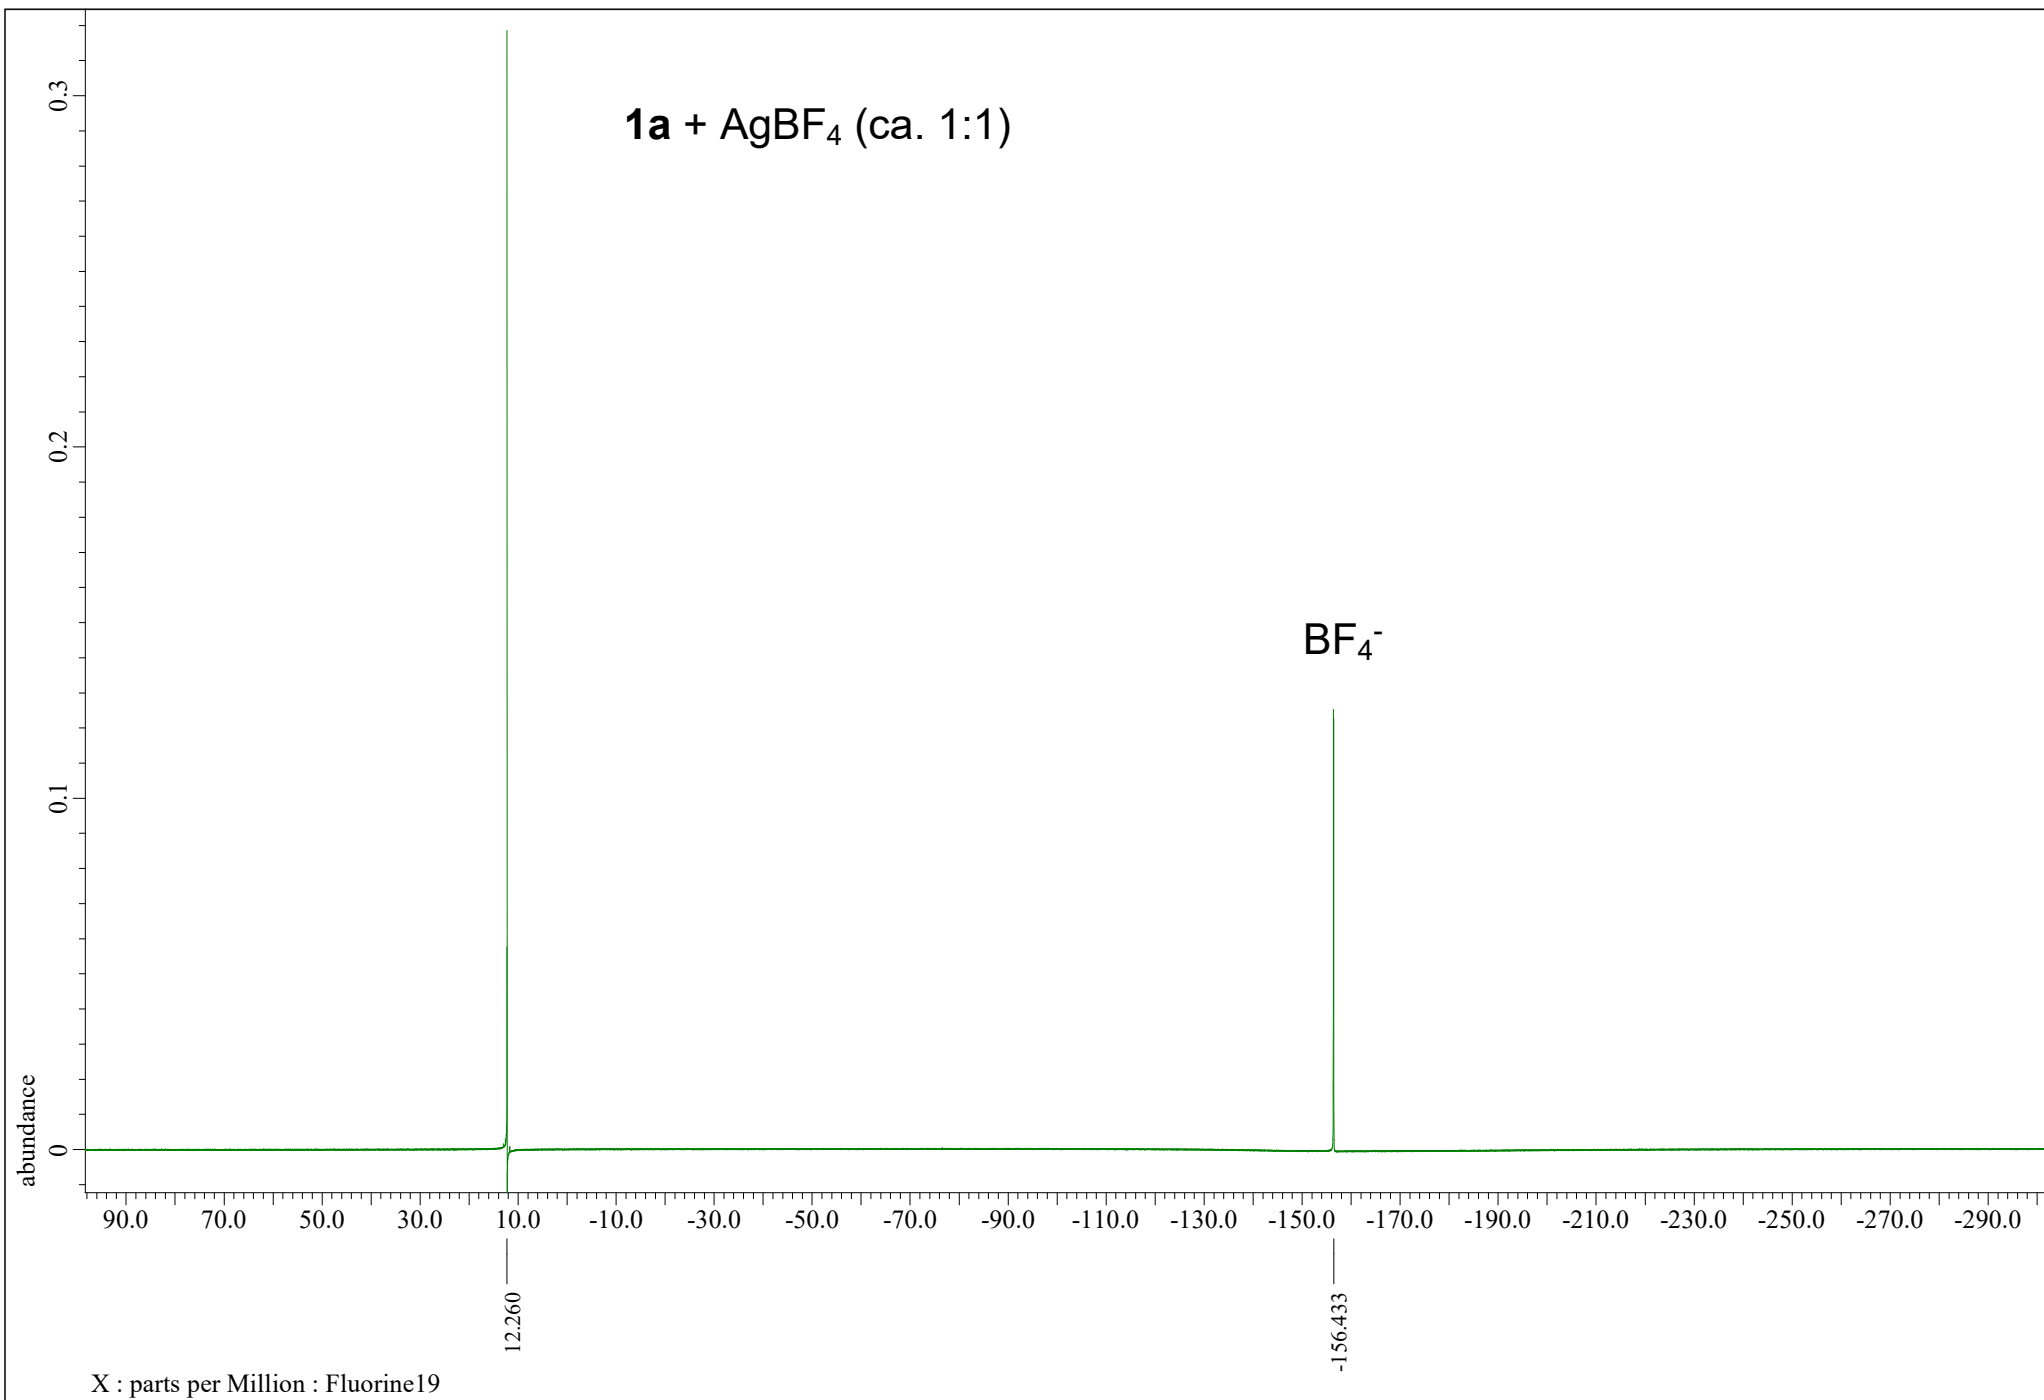

Supplement: d6sc02480g1.pdf [file d6sc02480g1.pdf]
